# Supplementary material for: Network Medicine Approach to Viral Infections: Unraveling Universal and Virus-Specific Immune Pathways
Source: Research Square preprint supplement (doi:10.21203/rs.3.rs-5240411/v1), 2025-10-31
Supplement: Supplementary file 1 [file 10044a7f268a3acaf41a37f0.xlsx]

## Sheet: CHIKV
Symbol	metap	metafc	idx	metapFDRadj
HESX1	8.11472e-47	6.35803	293.046	1.69971e-43
SPATS2L	1.14169e-50	4.93814	246.623	1.19569e-46
ALMS1P1	3.54347e-46	5.06819	230.352	5.30154e-43
SIGLEC1	4.04505e-42	5.35739	221.759	1.17677e-39
LAMP3	3.92625e-41	5.43741	219.704	9.5627e-39
USP18	1.43887e-43	5.02664	215.351	6.55186e-41
ATF3	3.43638e-40	5.1678	203.942	7.19784e-38
LINC02528	1.39338e-38	5.25069	198.77	2.02678e-36
IL1RN	2.54594e-45	4.32656	192.939	2.22197e-42
TMEM255A	2.08698e-45	4.14816	185.342	1.987e-42
CCL2	5.88951e-35	5.27146	180.442	4.50225e-33
CARD17	4.18675e-43	4.07832	172.831	1.62399e-40
SERPING1	7.19744e-39	4.49664	171.515	1.15967e-36
MT2A	3.09324e-42	4.11313	170.734	9.52809e-40
GBP1P1	1.53552e-32	5.23925	166.68	8.47521e-31
OAS3	2.39506e-39	4.26523	164.726	4.11205e-37
IFI44	6.49707e-42	3.96106	163.145	1.79063e-39
OASL	1.2691e-42	3.82508	160.257	4.5832e-40
LINC02068	1.27763e-29	5.46648	157.946	4.59814e-28
IFI44L	1.92058e-35	4.28902	148.9	1.66234e-33
CXCL10	1.51286e-32	4.63913	147.618	8.42775e-31
IFIT1	9.75688e-35	4.25769	144.807	7.24708e-33
IFIT3	2.91659e-38	3.85753	144.793	4.12776e-36
ZNF684	3.97962e-43	3.39259	143.846	1.62399e-40
MX1	1.53065e-40	3.60092	143.371	3.41074e-38
RGL1	6.33612e-46	3.15779	142.726	8.29477e-43
CMPK2	3.67387e-39	3.691	141.863	6.10738e-37
CTSL	1.81723e-44	3.23907	141.679	1.11952e-41
IFI6	1.39691e-37	3.8384	141.464	1.80616e-35
HERC5	5.18482e-36	3.99145	140.839	4.93642e-34
MROCKI	8.72296e-37	3.80135	137.074	9.322e-35
IFIH1	9.99401e-45	3.09929	136.369	8.05133e-42
RSAD2	9.31771e-32	4.36446	135.432	4.49698e-30
ERICH3	1.44516e-36	3.72638	133.554	1.49853e-34
HERC6	9.98268e-50	2.72315	133.436	5.22743e-46
IFIT2	4.84965e-37	3.63409	131.969	5.46134e-35
XAF1	4.05236e-43	3.10595	131.668	1.62399e-40
CD274	1.2098e-33	3.941	129.727	7.86973e-32
CCNA1	5.51983e-36	3.65285	128.792	5.20804e-34
PLSCR1	3.38581e-42	3.05768	126.803	1.01313e-39
KIAA1958	2.09083e-47	2.70857	126.435	5.57542e-44
EIF2AK2	1.62956e-44	2.88114	126.159	1.06665e-41
RIN2	1.394e-44	2.87184	125.947	1.04281e-41
IFI27	9.56108e-31	4.16968	125.172	4.05397e-29
DHX58	1.33638e-42	2.97031	124.379	4.6653e-40
SAMD4A	1.2277e-43	2.87124	123.207	6.12269e-41
CCRL2	1.83751e-43	2.86139	122.284	8.01845e-41
ZBP1	7.71412e-42	2.89687	119.098	2.07154e-39
CXCL11	4.09249e-30	4.01664	118.041	1.59333e-28
PML	4.57631e-37	3.1642	114.986	5.26678e-35
OAS2	1.22132e-38	2.98785	113.279	1.85374e-36
EPSTI1	2.26126e-41	2.7814	113.052	5.63862e-39
IFIT5	2.28044e-40	2.80008	111.001	4.87408e-38
NCOA7	1.35952e-40	2.76183	110.105	3.09526e-38
GALM	2.50517e-37	2.98852	109.383	3.05078e-35
MS4A4A	9.20593e-40	2.79912	109.266	1.81913e-37
LINC02555	4.49e-35	3.17037	108.895	3.5896e-33
GRIN3A	1.6398e-33	3.29017	107.869	1.04717e-31
ABCA1	1.45551e-45	2.39576	107.419	1.54983e-42
SAT1	4.27746e-39	2.79629	107.29	6.99965e-37
MSR1	2.50845e-32	3.39254	107.206	1.32682e-30
PARP12	1.47984e-45	2.3737	106.413	1.54983e-42
SLED1	1.17006e-31	3.41002	105.478	5.5448e-30
GADD45B	6.58092e-34	3.15572	104.712	4.47545e-32
NEXN	2.30835e-42	2.51084	104.543	7.79851e-40
DOCK4	4.93985e-35	3.02269	103.697	3.83223e-33
CFAP58-DT	2.72311e-37	2.82957	103.463	3.2408e-35
NT5C3A	7.00677e-41	2.54384	102.147	1.63071e-38
TFEC	2.00245e-36	2.85221	101.819	2.03609e-34
SHFL	1.60911e-44	2.29091	100.327	1.06665e-41
TNFAIP3	1.7665e-32	3.14078	99.729	9.63572e-31
TTC21A	2.79851e-33	3.03906	98.9309	1.69415e-31
TRIM38	1.70568e-46	2.14407	98.13	2.97726e-43
TMEM123	2.95412e-42	2.35122	97.6453	9.52809e-40
UBE2L6	9.55433e-40	2.4996	97.5339	1.85301e-37
NRIR	3.16898e-38	2.58708	97.013	4.36694e-36
OAS1	3.38915e-35	2.79947	96.4975	2.79485e-33
LINC01093	5.63589e-24	4.13153	96.0542	1.01592e-22
IFITM3	4.82968e-30	3.25264	95.3548	1.8596e-28
TENT5A	3.50462e-44	2.18681	95.0286	2.03911e-41
APOBEC3A	2.92196e-32	3.01049	94.9336	1.52247e-30
PGAP1	8.08401e-42	2.30998	94.9225	2.1166e-39
PFKFB3	2.45428e-37	2.56051	93.7405	3.02956e-35
NT5C3AP1	1.25731e-34	2.74604	93.0922	9.20828e-33
ANKRD22	2.7532e-26	3.62264	92.5953	6.86529e-25
TNFAIP6	8.08818e-32	2.95617	91.9136	3.95829e-30
MAFB	1.05758e-43	2.12993	91.5353	5.53801e-41
PNPT1	2.15303e-39	2.36693	91.5219	3.75812e-37
LAP3	3.94428e-32	2.90878	91.3476	2.01505e-30
GCH1	1.51849e-39	2.3021	89.3644	2.79003e-37
IFI35	1.03778e-32	2.7919	89.296	5.97182e-31
TRIM22	1.83781e-40	2.24453	89.1881	4.00988e-38
DDX60L	8.70551e-37	2.40641	86.7756	9.322e-35
CHROMR	4.38913e-41	2.14326	86.4968	1.04471e-38
RUBCN	8.30682e-39	2.26461	86.2375	1.31814e-36
RTP4	4.38949e-35	2.50053	85.9123	3.53624e-33
SAMSN1	3.37381e-36	2.37546	84.262	3.30223e-34
TNFSF10	9.4736e-33	2.62578	84.0866	5.4816e-31
NBN	2.71439e-39	2.16335	83.4325	4.58514e-37
CD300E	1.21215e-37	2.25163	83.1222	1.58685e-35
STOML1	1.18915e-33	2.52151	83.0203	7.78372e-32
ZCCHC2	4.43255e-42	1.99597	82.5402	1.25465e-39
MARCKS	2.89197e-35	2.36444	81.6651	2.42301e-33
TRIM6	3.45053e-30	2.76067	81.3351	1.36368e-28
ETV7	1.47339e-25	3.26399	81.0503	3.29016e-24
SLC1A3	8.32779e-32	2.60014	80.8111	4.0566e-30
GBP4	3.92565e-35	2.32276	79.9171	3.21198e-33
AIM2	7.85662e-33	2.48145	79.6665	4.59678e-31
NTNG2	1.2572e-32	2.49406	79.5622	7.07885e-31
TOR1B	2.43443e-36	2.21921	79.0342	2.42817e-34
TDRD7	1.8611e-39	2.03756	78.9153	3.36057e-37
FMNL2	6.45644e-37	2.14509	77.6308	7.04357e-35
ACOT9	2.03229e-39	2.0032	77.5078	3.6075e-37
RNF213	2.61989e-33	2.36922	77.1932	1.60457e-31
PARP14	8.04616e-34	2.27367	75.2458	5.36735e-32
SCARB2	1.03778e-43	1.74803	75.1372	5.53801e-41
GRAMD1B	3.13705e-33	2.30876	75.0427	1.88818e-31
SAMD9	2.02434e-37	2.03019	74.4952	2.55432e-35
RASGEF1B	3.73129e-36	2.10135	74.4469	3.61832e-34
PATL1	5.2699e-38	1.99651	74.4263	7.07585e-36
FFAR2	4.54091e-31	2.42992	73.7308	2.00662e-29
TNFSF13B	7.08279e-31	2.44317	73.6611	3.06156e-29
GBP1	1.394e-29	2.54779	73.5185	4.99978e-28
BISPR	4.72696e-40	1.86193	73.2211	9.70695e-38
DDX60	2.39928e-35	2.10836	72.9913	2.0429e-33
SOCS3	2.60372e-28	2.64302	72.9061	8.06769e-27
MX2	1.03365e-35	2.06671	72.3051	9.33226e-34
FLVCR2	6.75288e-31	2.39265	72.1874	2.93456e-29
PARP9	4.88618e-36	2.0365	71.9107	4.69476e-34
FCER1G	6.16987e-35	2.08924	71.4725	4.64871e-33
KLF5	1.22612e-28	2.55614	71.3457	3.9031e-27
MOV10	7.79907e-32	2.27471	70.7615	3.83473e-30
PHF11	5.31306e-43	1.67147	70.661	1.98728e-40
BCL2A1	1.13261e-32	2.20207	70.3472	6.43262e-31
PARP11	2.25687e-41	1.71153	69.5677	5.63862e-39
LILRB4	1.52465e-35	1.99575	69.4855	1.35319e-33
GBP3	5.10128e-37	1.90402	69.1012	5.68359e-35
PDCD1LG2	2.49844e-27	2.58071	68.653	6.99631e-26
DDX58	1.01676e-31	2.21454	68.6346	4.88467e-30
CASP5	5.1574e-26	2.70359	68.3673	1.22758e-24
NFKBIE	3.04609e-29	2.39114	68.1865	1.05635e-27
FRMD3	3.94514e-31	2.21332	67.2936	1.75819e-29
IRAK2	6.46998e-31	2.22151	67.0655	2.82334e-29
CD177	3.26404e-18	3.82451	66.8763	2.70874e-17
STAT2	5.07699e-32	2.12559	66.519	2.55631e-30
SRGAP2B	3.54524e-28	2.41824	66.3814	1.07934e-26
C3AR1	8.4337e-32	2.13209	66.2526	4.08917e-30
BLZF1	1.20883e-39	1.70061	66.1836	2.30183e-37
DDAH2	2.1803e-36	1.85208	66.0479	2.1956e-34
GTPBP2	1.12413e-36	1.8366	66.0242	1.1892e-34
B3GNT5	4.73896e-29	2.32514	65.858	1.60618e-27
CLEC5A	1.74218e-29	2.28621	65.7488	6.16414e-28
FCAR	1.49973e-30	2.19945	65.5964	6.18373e-29
ICAM1	3.26283e-26	2.569	65.4746	8.00272e-25
MYO10	9.78691e-28	2.40288	64.9002	2.86308e-26
CCR1	2.05847e-33	1.98554	64.9001	1.28324e-31
SAMD9L	1.73124e-32	2.04242	64.8705	9.49283e-31
N4BP1	2.3651e-33	1.98371	64.7208	1.46566e-31
TUFT1	3.56863e-32	2.05163	64.5188	1.83207e-30
SRGAP2	7.34182e-29	2.28997	64.4264	2.42558e-27
PLAC8	1.33852e-38	1.70078	64.4143	1.97442e-36
MIR3945HG	1.00398e-28	2.28656	64.0198	3.25532e-27
NUB1	3.11677e-34	1.90809	63.9329	2.20553e-32
CEACAM1	1.14821e-29	2.20903	63.9293	4.18996e-28
LGALS8	9.80001e-39	1.68137	63.9068	1.53187e-36
WDFY1	2.58683e-37	1.74355	63.7916	3.11401e-35
AKIRIN2	7.6291e-40	1.62462	63.551	1.53653e-37
TMEM268	2.6036e-35	1.82295	63.0456	2.19899e-33
IFITM1	1.40913e-26	2.43648	62.9855	3.64392e-25
RAB20	9.60635e-27	2.4065	62.6109	2.50891e-25
CMTR1	2.36714e-34	1.85995	62.5422	1.68647e-32
CARD16	5.05262e-34	1.85221	61.6721	3.50438e-32
STAT1	4.68942e-35	1.78497	61.2761	3.69751e-33
BRCA2	3.15565e-35	1.7729	61.1666	2.62294e-33
SLC3A2	1.27625e-36	1.70061	61.0419	1.33662e-34
ADM	7.82311e-29	2.17082	61.0143	2.56838e-27
ARL5B	1.40948e-29	2.10987	60.8717	5.03806e-28
PIWIL4	2.45882e-37	1.65951	60.7535	3.02956e-35
DYNLT1	1.66553e-34	1.79357	60.5841	1.20297e-32
SRGAP2C	2.4519e-30	2.04383	60.5189	9.83858e-29
ISG20	2.09816e-32	1.91007	60.5074	1.12687e-30
APOL6	6.35452e-32	1.93858	60.4778	3.15407e-30
ELF1	1.29627e-39	1.55362	60.416	2.42426e-37
NFKBIA	4.77223e-25	2.48285	60.3861	9.91658e-24
TRAFD1	3.30249e-33	1.84819	60.0314	1.9764e-31
LINC02785	1.48391e-27	2.22199	59.6128	4.25779e-26
CYSTM1	8.70402e-28	2.19804	59.4797	2.57506e-26
LINC02656	1.34782e-25	2.39106	59.4665	3.02913e-24
PHACTR1	2.08027e-26	2.31115	59.3547	5.30088e-25
TMEM62	2.9957e-38	1.57927	59.2599	4.1832e-36
BLVRA	6.41402e-36	1.67507	58.9506	5.99768e-34
TRIM5	9.08232e-35	1.73144	58.9413	6.79422e-33
APOL1	3.33664e-28	2.12889	58.495	1.02477e-26
NFIL3	4.77104e-31	1.92819	58.4654	2.09067e-29
TIFA	1.3127e-33	1.77707	58.4332	8.48637e-32
IDO1	3.68337e-20	3.00515	58.4014	4.03092e-19
RAB1AP1	1.70276e-24	2.44598	58.1382	3.26015e-23
FIRRE	3.22108e-36	1.63244	57.9387	3.18249e-34
HIF1A	1.58776e-30	1.93848	57.7651	6.47027e-29
MAD2L1BP	1.41788e-37	1.55999	57.4831	1.8109e-35
EMP1	8.38116e-23	2.58268	57.017	1.25753e-21
MTHFD2	6.09199e-38	1.52786	56.8595	8.07612e-36
PRLR	8.97732e-26	2.25692	56.5288	2.05732e-24
CSRNP1	3.69968e-24	2.39132	56.0331	6.84572e-23
LMNB1	1.13849e-29	1.93531	56.015	4.16903e-28
CHMP5	5.37613e-34	1.68335	56.0042	3.68002e-32
KPNB1-DT	5.13643e-32	1.78579	55.8761	2.57387e-30
DCUN1D3	4.0162e-35	1.62378	55.852	3.26059e-33
RAP2C	3.03593e-42	1.33835	55.565	9.52809e-40
LHFPL2	7.64158e-31	1.84426	55.5434	3.26654e-29
BST2	2.49243e-28	2.00877	55.4488	7.74578e-27
IER5	3.53749e-30	1.87319	55.168	1.39279e-28
CXCR2P1	5.99015e-35	1.61051	55.1156	4.54601e-33
ADAP2	1.63086e-31	1.78768	55.0383	7.55751e-30
SLC24A1	1.01853e-21	2.61331	54.8587	1.34177e-20
CREM	2.63981e-32	1.73283	54.7202	1.38929e-30
LINC02649	2.4987e-23	2.42022	54.7025	4.05091e-22
NFKBIZ	1.54579e-30	1.83056	54.5706	6.32387e-29
PLEK	1.99104e-32	1.71369	54.3254	1.07485e-30
KCNMA1	4.66041e-19	2.96127	54.2847	4.30031e-18
ARL8A	1.12852e-29	1.8745	54.2621	4.14701e-28
ELMO2	2.60148e-33	1.66258	54.1749	1.60267e-31
RAB33B-AS1	1.08908e-32	1.68436	53.837	6.23273e-31
LINC02471	1.57277e-26	2.07759	53.6088	4.04707e-25
PPARG	1.09501e-22	2.44018	53.5877	1.63129e-21
STAC3	4.07385e-30	1.81955	53.4765	1.59199e-28
LGALS9	1.13867e-27	1.97457	53.202	3.29427e-26
NMI	4.34576e-34	1.58523	52.8865	3.05457e-32
KLF6	1.59547e-36	1.47116	52.6632	1.63818e-34
LMO2	1.73545e-33	1.60624	52.6212	1.08834e-31
CD2AP	1.34544e-35	1.49538	52.1456	1.20434e-33
RAB1A	1.0231e-35	1.48789	52.0615	9.31736e-34
ZNFX1	4.82303e-32	1.65754	51.9088	2.44017e-30
NAPA	3.58061e-26	2.0397	51.9023	8.72087e-25
SYTL3	2.27936e-32	1.63988	51.8893	1.21795e-30
SHISA5	1.80254e-32	1.63411	51.8733	9.78132e-31
GBP5	3.73456e-22	2.41271	51.699	5.17355e-21
TRIM69	9.97476e-36	1.47172	51.5118	9.16365e-34
ZNF496	1.16608e-29	1.76287	51.0056	4.24039e-28
MAP2K6	1.75532e-30	1.71146	50.9257	7.12538e-29
RIPK2	6.55336e-28	1.86906	50.8077	1.94981e-26
TASL	5.73612e-33	1.57582	50.8065	3.3926e-31
SP100	3.47455e-38	1.35344	50.6985	4.72584e-36
SP110	9.39323e-33	1.57767	50.5283	5.46529e-31
LILRB1	2.22693e-34	1.49743	50.392	1.59744e-32
LILRA5	2.59915e-23	2.19763	49.6338	4.20075e-22
B4GALT5	9.39065e-30	1.70868	49.5982	3.48753e-28
CDKN1A	6.88069e-24	2.12596	49.2422	1.22138e-22
DUSP5	1.19095e-26	1.89125	49.0289	3.08733e-25
IRF1-AS1	2.12774e-31	1.59737	48.9946	9.77362e-30
IRF5	3.61228e-30	1.66004	48.8752	1.41691e-28
IL18R1	1.13389e-25	1.95772	48.8362	2.56484e-24
PGS1	1.29582e-28	1.75034	48.8126	4.10003e-27
ADAMTSL4-AS1	7.68422e-26	1.9423	48.7798	1.78441e-24
CIR1	1.66574e-33	1.48812	48.778	1.05729e-31
RILPL2	4.17009e-27	1.84382	48.6396	1.13733e-25
KLHDC7B-DT	3.59047e-25	1.98655	48.5609	7.67408e-24
IFI16	1.35908e-31	1.57321	48.5599	6.35432e-30
DTX3L	2.69811e-33	1.49097	48.5594	1.64287e-31
TRIM25	9.53313e-30	1.6717	48.5141	3.52793e-28
CNP	8.29141e-27	1.85468	48.3727	2.18181e-25
DRAP1	9.23099e-30	1.66491	48.3402	3.44043e-28
MICB	1.39223e-32	1.51626	48.3025	7.79723e-31
PIK3AP1	2.42251e-32	1.52489	48.2104	1.28786e-30
RBCK1	2.67749e-31	1.55779	47.6252	1.20868e-29
DDIT3	6.72762e-25	1.95485	47.253	1.36547e-23
WARS1	7.71765e-24	2.03919	47.1307	1.35616e-22
FNDC3B	5.76608e-33	1.45529	46.9174	3.3926e-31
CMC2	2.97604e-37	1.28225	46.8359	3.50203e-35
FAM72A	7.29644e-23	2.10152	46.5211	1.10747e-21
C18orf25	4.24028e-30	1.58154	46.454	1.64476e-28
MEF2A	2.02238e-35	1.33808	46.4235	1.7361e-33
LIMK2	4.23083e-25	1.90155	46.3475	8.89748e-24
HNRNPLL	1.58496e-27	1.72676	46.2772	4.52297e-26
CD69	2.09614e-20	2.34736	46.1926	2.38618e-19
UPP1	2.04565e-27	1.7286	46.135	5.79031e-26
IL31RA	2.36403e-19	2.46425	45.9	2.27979e-18
MERTK	1.68256e-23	2.01174	45.8155	2.80151e-22
FNIP2	4.82186e-35	1.32803	45.5736	3.76861e-33
XRN1	2.00364e-30	1.52614	45.3234	8.07081e-29
CNIH4	8.28799e-36	1.29189	45.3216	7.68143e-34
ETS2	7.95244e-28	1.66918	45.2338	2.35937e-26
PRKCE	2.27944e-31	1.47238	45.117	1.04247e-29
FGF13	3.06012e-20	2.30645	45.0086	3.3771e-19
UBE2J1	4.54403e-34	1.33629	44.5555	3.17264e-32
CES1	2.6593e-19	2.39607	44.5075	2.54578e-18
CACNA1E	1.41254e-23	1.94318	44.4017	2.37457e-22
MAFG	1.161e-30	1.48014	44.3084	4.88321e-29
ITPRIP	3.83747e-29	1.5552	44.1925	1.3177e-27
TMEM252	8.52367e-26	1.7544	43.9816	1.97061e-24
PELI1	1.04646e-21	2.08846	43.8165	1.3751e-20
FCGR2B	3.15173e-24	1.85784	43.662	5.91542e-23
LILRA6	2.88885e-27	1.64362	43.6206	8.04653e-26
HSPA1B	5.35941e-25	1.79226	43.4998	1.10927e-23
C3orf38	4.81349e-37	1.19343	43.3423	5.46134e-35
TAP1	1.7192e-28	1.56059	43.3292	5.40697e-27
AZI2	5.41748e-35	1.25542	43.0185	4.17186e-33
TCN1	3.28976e-25	1.75062	42.8602	7.06019e-24
PLAUR	8.85189e-25	1.78123	42.8438	1.75579e-23
CLEC4D	7.77052e-25	1.77173	42.7155	1.55604e-23
ZFP36	2.96605e-26	1.66966	42.6229	7.36101e-25
GTPBP1	9.42854e-26	1.70252	42.6064	2.15131e-24
MYLIP	3.01631e-37	1.16436	42.5232	3.50998e-35
CDKN2D	4.6425e-29	1.49729	42.4231	1.5786e-27
ADAR	1.05788e-30	1.41147	42.3095	4.46741e-29
SLA	3.0478e-28	1.53562	42.2543	9.38812e-27
EAF1	1.23493e-30	1.41058	42.1881	5.17337e-29
TMEM140	4.02132e-26	1.65665	42.0718	9.74891e-25
ZFYVE26	6.81879e-30	1.4412	42.0346	2.60632e-28
SP140	1.07476e-29	1.44907	41.9776	3.96335e-28
ANKDD1A	3.93607e-19	2.27302	41.8347	3.66748e-18
ADPRH	5.17718e-34	1.25549	41.7901	3.56715e-32
PMAIP1	6.68331e-29	1.48299	41.7833	2.22204e-27
MASTL	2.6489e-30	1.41177	41.7558	1.05885e-28
PIM3	4.45953e-22	1.95154	41.6667	6.12922e-21
MILR1	2.95489e-26	1.62796	41.5609	7.35072e-25
SPTLC2	3.05784e-29	1.45458	41.4768	1.05692e-27
SIPA1L2	1.35386e-23	1.8122	41.4423	2.29063e-22
SPPL2A	1.27445e-38	1.09256	41.4022	1.90676e-36
SCARF1	2.57251e-23	1.83141	41.3708	4.16413e-22
MCEMP1	7.24295e-19	2.26806	41.1428	6.51679e-18
TANK	3.73455e-31	1.34446	40.9089	1.67145e-29
SPATA13	1.89848e-35	1.17585	40.8275	1.6569e-33
CKAP4	5.08136e-25	1.6738	40.6633	1.0538e-23
STX11	2.08723e-25	1.64729	40.6559	4.56359e-24
NRIP1	1.19839e-31	1.31093	40.5357	5.65349e-30
TOMM40L	2.23747e-26	1.57765	40.4671	5.66014e-25
FCGR1B	1.07788e-21	1.90978	40.0431	1.41462e-20
EFCAB2	5.39926e-27	1.52286	40.002	1.44991e-25
PLEKHO2	2.31727e-28	1.44609	39.9627	7.22284e-27
USPL1	8.73887e-28	1.47624	39.9448	2.57809e-26
ACVR1B	5.63866e-27	1.52024	39.9045	1.50647e-25
IRF9	7.32758e-31	1.32062	39.7968	3.14516e-29
ERI1	3.12008e-26	1.55898	39.763	7.6886e-25
LYRM1	1.52825e-33	1.20935	39.6857	9.81921e-32
TLR2	1.80629e-25	1.60211	39.6414	3.97422e-24
GYG1	3.67744e-27	1.49534	39.5284	1.01352e-25
SECTM1	2.78397e-23	1.74733	39.4115	4.47186e-22
SESTD1	1.69529e-33	1.19985	39.3199	1.06956e-31
LINC01270	5.02898e-22	1.84174	39.2264	6.88477e-21
MAP3K13	5.34522e-26	1.54871	39.139	1.26082e-24
BRI3	3.38209e-26	1.53035	38.9792	8.25656e-25
GPD2	1.42621e-30	1.30483	38.9437	5.90383e-29
RIT1	3.79406e-28	1.41945	38.9227	1.15174e-26
SLC2A3	1.07098e-26	1.48893	38.6679	2.78323e-25
TLR7	1.13629e-32	1.21003	38.6537	6.43262e-31
C1GALT1	1.40773e-30	1.29384	38.6229	5.85045e-29
KIAA1109	7.8864e-30	1.32178	38.4678	2.98174e-28
NAIP	4.31304e-23	1.71633	38.386	6.74186e-22
MTCO3P23	1.71621e-20	1.94002	38.3453	1.9795e-19
TCF7L2	4.01588e-29	1.34948	38.3201	1.37446e-27
PSTPIP2	1.5088e-24	1.60302	38.1862	2.91543e-23
KDM1B	4.61043e-33	1.17886	38.1199	2.74347e-31
CSGALNACT2	3.05127e-32	1.20912	38.106	1.58198e-30
RBM7	8.07931e-31	1.26196	37.9757	3.43962e-29
SYNPO2	4.50025e-24	1.62469	37.9312	8.21099e-23
GAB2	8.72212e-24	1.64165	37.8554	1.51991e-22
LRRC70	1.98005e-19	2.01958	37.7728	1.93443e-18
ZC3HAV1	1.01618e-27	1.39763	37.7264	2.96446e-26
MXD1	3.95457e-25	1.5437	37.6708	8.33324e-24
AP5B1	4.34523e-26	1.4851	37.665	1.04856e-24
FUT4	1.23917e-29	1.30199	37.6365	4.49061e-28
SPATA1	9.22288e-28	1.38718	37.5025	2.71324e-26
RNF138	4.46717e-26	1.47738	37.4514	1.07551e-24
CGAS	2.78499e-32	1.18523	37.4	1.45836e-30
RPS2P44	3.42013e-19	2.0203	37.3068	3.21535e-18
GLRX	2.97313e-29	1.30651	37.2706	1.03792e-27
SIGLEC14	3.65272e-17	2.26381	37.2111	2.59884e-16
ERMN	6.13407e-25	1.53446	37.1528	1.24742e-23
MYOF	7.89547e-26	1.47743	37.0873	1.82941e-24
KPNB1	5.95563e-29	1.31179	37.0255	1.99276e-27
POMP	7.63465e-34	1.11627	36.9677	5.12549e-32
EPAS1	2.17129e-20	1.8723	36.8156	2.46905e-19
PLIN3	8.0041e-25	1.51961	36.6175	1.59975e-23
TMEM167B	1.54491e-30	1.22746	36.592	6.32387e-29
ACSL1	7.81859e-23	1.65407	36.5662	1.17989e-21
HSH2D	1.50508e-23	1.6014	36.5479	2.51801e-22
RAB24	2.22013e-25	1.48163	36.5276	4.84405e-24
PHACTR2	1.29176e-28	1.3077	36.4701	4.09958e-27
KLF4	7.18518e-23	1.64564	36.4403	1.09262e-21
ENPP2	3.24753e-24	1.5493	36.3906	6.07346e-23
MCL1	2.66672e-26	1.42231	36.3743	6.66553e-25
LATS2	1.24884e-29	1.2532	36.2219	4.51003e-28
CDK17	2.4673e-31	1.18176	36.1711	1.12348e-29
FAM8A1	3.08338e-26	1.41416	36.0767	7.61611e-25
ADAM9	3.60883e-27	1.35825	35.9157	9.97238e-26
SLC26A8	1.47836e-21	1.72337	35.8982	1.9091e-20
MTF1	7.30934e-30	1.2271	35.7531	2.77358e-28
NPC2	4.4816e-26	1.40191	35.5363	1.07651e-24
CHD1	4.73955e-27	1.34956	35.5262	1.27931e-25
UGCG	3.41271e-28	1.2893	35.413	1.04202e-26
LYN	1.68622e-27	1.31937	35.3235	4.78585e-26
MAP3K8	2.398e-27	1.32549	35.2849	6.75115e-26
HAVCR2	1.30565e-27	1.31146	35.2574	3.75661e-26
LAPTM4A	4.72462e-30	1.20104	35.2213	1.82586e-28
CHMP2B	6.9281e-29	1.24803	35.1439	2.29614e-27
RNASE2	6.02692e-22	1.65452	35.1088	8.18676e-21
CASP1P2	3.02141e-29	1.22962	35.0685	1.05127e-27
RPS2P36	1.91943e-24	1.47432	34.9662	3.65494e-23
EHD4	1.10067e-22	1.58361	34.7735	1.63741e-21
PPP1R15A	1.11713e-16	2.16975	34.6115	7.52395e-16
FCGR1CP	1.86685e-16	2.18529	34.3722	1.21438e-15
GBP6	6.3813e-18	1.99763	34.3493	5.0287e-17
REL	5.22704e-26	1.35327	34.213	1.23573e-24
MIR222HG	8.03595e-16	2.26648	34.2124	4.81467e-15
TRIM26	7.27021e-27	1.3066	34.1526	1.93251e-25
TIPARP	8.02821e-25	1.40392	33.8281	1.60151e-23
LACTB	5.52525e-25	1.39321	33.796	1.13686e-23
STARD4	1.6791e-25	1.36059	33.7084	3.70996e-24
MYL12A	1.31204e-31	1.08654	33.5545	6.16188e-30
SLC9A8	3.90958e-23	1.49708	33.5463	6.16643e-22
MIER1	1.70432e-31	1.08265	33.3114	7.86315e-30
SORT1	2.5318e-24	1.40842	33.2339	4.79485e-23
TBK1	6.63217e-30	1.13874	33.2266	2.54428e-28
ECE1	2.45408e-22	1.53541	33.1804	3.48732e-21
PI4K2B	1.92686e-24	1.39796	33.1529	3.66244e-23
LY96	5.60256e-23	1.4814	32.9635	8.65422e-22
LINC00968	4.17788e-23	1.46978	32.8923	6.55014e-22
BUD31	2.20827e-29	1.14638	32.8507	7.76082e-28
TBC1D8	4.06908e-26	1.28644	32.6633	9.84191e-25
JAK2	2.18225e-28	1.17794	32.5831	6.82229e-27
LDLR	9.67031e-20	1.71267	32.5657	9.92117e-19
RNF19B	5.75737e-24	1.40106	32.5604	1.03603e-22
ZNF438	2.13659e-26	1.26398	32.4466	5.43118e-25
PKN2-AS1	1.27945e-20	1.62409	32.3079	1.49217e-19
RMI2	9.95675e-20	1.69721	32.2502	1.01833e-18
RAB39A	2.00954e-26	1.25418	32.2284	5.13314e-25
RBM43	1.61006e-27	1.20036	32.1614	4.58211e-26
GORASP1	9.54815e-25	1.33819	32.1434	1.8832e-23
ANXA3	7.2845e-19	1.76856	32.0775	6.54293e-18
WSB1	8.0275e-30	1.10061	32.0228	3.02417e-28
PIM2	5.67923e-19	1.74952	31.9212	5.16307e-18
PRKAG2	4.04483e-31	1.04906	31.8843	1.79498e-29
SERTAD3	2.33427e-22	1.46902	31.7777	3.33062e-21
PRUNE2	4.36272e-19	1.72773	31.7215	4.03272e-18
H1-0	3.054e-20	1.6212	31.638	3.37389e-19
ACSL3	5.32345e-29	1.11624	31.5603	1.79268e-27
LINC01506	2.67632e-23	1.39815	31.5596	4.31882e-22
C4orf33	5.30815e-29	1.11457	31.5145	1.79268e-27
ERP44	1.09371e-31	1.01717	31.4928	5.20654e-30
PPP1R15B	2.11795e-22	1.44775	31.3786	3.0427e-21
RAB8A	7.30219e-25	1.29813	31.3324	1.47069e-23
CDH23	7.50504e-23	1.41246	31.2501	1.13584e-21
IGF2BP3	1.52662e-24	1.30502	31.0807	2.94444e-23
SKIL	1.13642e-27	1.15267	31.058	3.29427e-26
AQP9	5.13234e-22	1.45773	31.0345	7.00796e-21
SMURF1	2.08704e-22	1.43139	31.0331	3.00654e-21
LONRF1	2.19059e-29	1.07843	30.9071	7.72461e-28
RAB8B	1.5818e-27	1.15084	30.8436	4.52297e-26
MARCHF5	5.44398e-29	1.09056	30.8238	1.8274e-27
DYSF	8.67884e-19	1.70588	30.8108	7.76204e-18
DDIT4	1.71976e-15	2.08553	30.7918	9.84208e-15
TRIB1	6.08946e-22	1.44753	30.71	8.26101e-21
TIMM10	1.27238e-19	1.61743	30.562	1.28132e-18
H3-3B	2.61216e-25	1.24288	30.5538	5.66401e-24
PHTF1	4.16444e-27	1.15368	30.4345	1.13733e-25
MTND5P32	7.50602e-16	2.00176	30.2759	4.51266e-15
IRF1	8.60571e-20	1.5858	30.2336	8.8534e-19
TSC22D3	1.60877e-18	1.69615	30.1805	1.39245e-17
CEBPB	6.04877e-23	1.35562	30.1197	9.30231e-22
CD300LF	7.40049e-24	1.29703	30.0014	1.31143e-22
IL15	5.34895e-27	1.13909	29.9258	1.44009e-25
RICTOR	3.55439e-25	1.2203	29.8355	7.61249e-24
PCBP1-AS1	9.37633e-23	1.35299	29.8036	1.40484e-21
DUSP3	3.56643e-29	1.04739	29.796	1.22866e-27
GNG5	1.43447e-23	1.30313	29.7678	2.40756e-22
SAMD8	3.93187e-27	1.12628	29.7399	1.0808e-25
ANKFY1	5.14499e-28	1.0897	29.7363	1.54394e-26
STAT3	8.02348e-27	1.13703	29.6716	2.12197e-25
CPEB3	1.07455e-27	1.09639	29.5683	3.12605e-26
SERPINB9P1	3.85502e-20	1.51386	29.3899	4.20998e-19
CASP4	8.652e-25	1.21656	29.2739	1.72267e-23
KIAA0319L	2.1711e-23	1.2914	29.2675	3.56394e-22
SERPINB1	8.33523e-24	1.26596	29.2172	1.45491e-22
ADGRG3	1.28764e-16	1.83511	29.1603	8.59493e-16
CCDC146	4.18324e-27	1.09945	29.0017	1.13795e-25
PSMA6	3.71911e-25	1.18617	28.9776	7.91672e-24
RN7SL834P	4.94214e-23	1.29648	28.9194	7.70223e-22
SAT2	1.70537e-20	1.46003	28.8622	1.96917e-19
HCAR2	1.0673e-19	1.51964	28.8302	1.08734e-18
CCR5AS	3.00079e-22	1.33173	28.6625	4.21842e-21
CD63	6.6796e-21	1.42009	28.6507	8.1249e-20
MT-RNR1	1.87869e-12	2.44168	28.6315	7.26035e-12
ADAM17	5.57625e-27	1.08836	28.5734	1.49361e-25
NAP1L4P1	2.22048e-19	1.53146	28.5673	2.15126e-18
FAM72B	1.8218e-17	1.70567	28.552	1.34175e-16
MT-RNR2	3.26269e-16	1.84252	28.5341	2.05597e-15
SELL	3.39776e-23	1.26857	28.5033	5.39981e-22
ETV6	1.55636e-22	1.30347	28.4259	2.28609e-21
CLEC4E	2.56318e-18	1.60857	28.2967	2.15963e-17
SLC16A6	3.51783e-24	1.20528	28.2683	6.52076e-23
CARD6	2.14973e-27	1.05881	28.236	6.06849e-26
FEM1C	4.44159e-27	1.07141	28.2343	1.20198e-25
ALDH1A2	8.50505e-22	1.33939	28.2213	1.12894e-20
CPEB2	2.96478e-23	1.25223	28.2103	4.74049e-22
HLA-B	1.0865e-25	1.12643	28.1202	2.46298e-24
SQOR	6.77332e-23	1.26631	28.0731	1.03256e-21
CLEC1A	7.4171e-21	1.39392	28.0593	8.92865e-20
PSMA4	1.03242e-28	1.00016	27.9907	3.33721e-27
HK2	1.09703e-20	1.39783	27.9003	1.28802e-19
C4orf3	2.24529e-26	1.08766	27.8971	5.66626e-25
SLC22A4	3.47028e-21	1.36234	27.8729	4.3474e-20
KDM6A	5.67252e-25	1.14925	27.8649	1.15806e-23
KLHDC8B	1.14457e-18	1.55031	27.8147	1.00732e-17
ELF4	2.67186e-19	1.49731	27.8098	2.55547e-18
PABIR3	1.33047e-25	1.10918	27.5919	2.99655e-24
CASP1	1.33007e-25	1.10763	27.5536	2.99655e-24
TNFSF15	3.6442e-20	1.40927	27.394	3.99222e-19
DDX10P1	1.65413e-19	1.45779	27.3794	1.63586e-18
DAPP1	3.30886e-24	1.16456	27.3442	6.15519e-23
EPB41L3	1.60318e-25	1.10221	27.3293	3.55723e-24
NECAP1	6.41101e-26	1.08447	27.3212	1.49538e-24
SBF2	7.54501e-27	1.04445	27.2835	2.00048e-25
ITPRID2	1.6823e-26	1.05825	27.2754	4.31831e-25
MEFV	5.04026e-20	1.41141	27.2368	5.41402e-19
USP25	2.72145e-27	1.02349	27.1891	7.60047e-26
PRKD2	3.68966e-17	1.65048	27.1224	2.61978e-16
EFHD2	3.54861e-21	1.32499	27.096	4.44021e-20
ZNF267	9.99332e-24	1.17209	26.9585	1.72138e-22
TBC1D2	2.26848e-20	1.36344	26.7837	2.56287e-19
H2BC21	2.24451e-24	1.13091	26.7448	4.25848e-23
SIGLEC5	2.99763e-20	1.36234	26.5972	3.31863e-19
CNEP1R1	3.10379e-25	1.08485	26.5877	6.67474e-24
HIVEP1	5.97533e-24	1.14123	26.5035	1.07157e-22
PPP4R1L	8.59768e-22	1.25672	26.4735	1.13979e-20
DISC1	3.01032e-22	1.22788	26.4257	4.22616e-21
RN7SL473P	2.16957e-18	1.49339	26.3787	1.84431e-17
USB1	7.85108e-21	1.31193	26.3764	9.4186e-20
TYMP	6.12282e-18	1.53128	26.3581	4.84345e-17
DNAJA1	3.29761e-24	1.11815	26.2561	6.14517e-23
CHSY1	1.7312e-22	1.20524	26.228	2.51468e-21
SIRPD	4.19911e-19	1.41965	26.0887	3.89524e-18
LINC02062	8.23667e-22	1.23625	26.0655	1.09889e-20
SUCNR1	1.06856e-19	1.37305	26.0484	1.08756e-18
GBP2	1.83137e-20	1.31844	26.0224	2.09617e-19
CASP7	4.89589e-26	1.02775	26.0126	1.17065e-24
RAB5A	1.89078e-24	1.09475	25.9711	3.60694e-23
ZBTB43	5.77038e-21	1.2672	25.6467	7.08478e-20
SMCHD1	1.93141e-23	1.12862	25.6356	3.19048e-22
IDI1	1.44692e-20	1.29103	25.6134	1.68e-19
KDM6B	4.21779e-18	1.47375	25.6062	3.41896e-17
APOL4	6.88271e-14	1.94478	25.5976	3.24696e-13
GRIPAP1	9.53954e-25	1.06442	25.568	1.8832e-23
ARID4B	2.76397e-25	1.03802	25.4921	5.98081e-24
CLEC2B	2.39291e-23	1.11855	25.3027	3.89751e-22
PTX3	2.84524e-20	1.2935	25.2826	3.16329e-19
LINC01303	1.74996e-18	1.42205	25.2514	1.50595e-17
NT5C2	1.04432e-21	1.19958	25.1687	1.37401e-20
RGS1	7.4042e-14	1.9033	24.9913	3.47732e-13
STK24-AS1	2.55494e-20	1.2718	24.9178	2.86487e-19
HSPA5	5.06023e-20	1.28702	24.8342	5.4299e-19
LMTK2	1.59887e-19	1.31984	24.808	1.59021e-18
CBWD2	1.55715e-24	1.04097	24.7832	2.9978e-23
TFE3	2.09644e-21	1.19778	24.7684	2.6743e-20
TRIM14	2.69305e-24	1.04765	24.6929	5.08187e-23
ERLIN1	1.04533e-17	1.44872	24.6003	7.95622e-17
RAB5IF	1.07886e-20	1.23199	24.5991	1.26954e-19
CLEC7A	1.83137e-22	1.13021	24.5676	2.65282e-21
FOS	2.8208e-15	1.68695	24.5445	1.58064e-14
PPIF	1.98733e-18	1.38466	24.5108	1.69417e-17
PDE1B	3.33256e-18	1.39962	24.4615	2.76123e-17
BACH1	4.36652e-24	1.04699	24.4576	7.98091e-23
ST3GAL4	3.89921e-17	1.49026	24.4537	2.7555e-16
PLSCR4	2.35514e-17	1.46907	24.4276	1.71884e-16
NFKB2	4.85272e-17	1.49508	24.3907	3.3927e-16
TTC26	4.22169e-16	1.58389	24.3516	2.62241e-15
KCNE1	1.12421e-15	1.62788	24.3354	6.57047e-15
DENND5A	7.38727e-22	1.14922	24.2848	9.90612e-21
FCGR1A	1.96031e-14	1.77064	24.2714	9.91323e-14
IER2	5.05917e-22	1.13368	24.1428	6.91706e-21
PPIAP29	1.84926e-20	1.21858	24.0463	2.11434e-19
LRG1	4.71337e-15	1.6722	23.957	2.57294e-14
SLFN12	7.92624e-24	1.03593	23.931	1.39048e-22
LINC00189	6.31901e-15	1.68412	23.9135	3.39355e-14
PLK2	1.89704e-17	1.42944	23.9029	1.39521e-16
JMJD1C	9.69618e-21	1.19101	23.8362	1.15004e-19
NLRP3	6.62677e-17	1.47317	23.834	4.57798e-16
CALHM6	2.62916e-17	1.43415	23.7784	1.90029e-16
SLC15A4	1.20442e-19	1.25384	23.7216	1.21521e-18
MLKL	2.30983e-21	1.14773	23.6851	2.93578e-20
ANXA5	4.03613e-23	1.04943	23.5011	6.3469e-22
BLOC1S2	5.82883e-24	1.01116	23.4936	1.04709e-22
RBM47	1.82912e-20	1.18673	23.4233	2.09588e-19
MGAT1	4.03452e-23	1.04303	23.3579	6.3469e-22
STAP1	2.8839e-20	1.19534	23.357	3.19609e-19
H4C8	4.21174e-23	1.04214	23.3185	6.59335e-22
IL1B	4.43783e-18	1.34345	23.3126	3.59176e-17
NAMPT	6.83555e-18	1.35509	23.2605	5.35844e-17
CASZ1	2.89472e-18	1.32614	23.2584	2.42144e-17
CLEC6A	2.54264e-17	1.39562	23.1599	1.84157e-16
AMZ2P1	3.32137e-19	1.25207	23.1366	3.12812e-18
CCNL1	2.99678e-19	1.24563	23.0733	2.84545e-18
TAP2	1.5777e-22	1.05797	23.0657	2.31095e-21
UBE2D1	4.9882e-19	1.2578	23.0203	4.57455e-18
MIR23AHG	1.44775e-12	1.93903	22.9568	5.66813e-12
TAPBP	2.70655e-20	1.16915	22.8774	3.01872e-19
RALB	9.80542e-21	1.14172	22.8442	1.16168e-19
PFKFB2	5.57882e-15	1.60136	22.825	3.01481e-14
KIF1B	5.67334e-22	1.07356	22.8091	7.72651e-21
FAS	3.44728e-19	1.2327	22.7587	3.23797e-18
PRKCD	2.26951e-19	1.21937	22.7341	2.19672e-18
RBM11	3.1352e-16	1.46567	22.7234	1.9792e-15
HLA-C	5.24164e-20	1.1783	22.7183	5.61305e-19
C5	2.24792e-21	1.09592	22.6287	2.86057e-20
APOL2	4.85149e-19	1.23489	22.616	4.46482e-18
SRGN	1.07848e-18	1.2581	22.6045	9.52353e-18
CFL2	3.60928e-20	1.16253	22.6025	3.95811e-19
SLC43A3	5.14366e-19	1.23462	22.5797	4.713e-18
LRRK2-DT	1.18013e-19	1.19227	22.5674	1.193e-18
P2RY14	1.84557e-16	1.4329	22.5451	1.20128e-15
EREG	4.64545e-11	2.18081	22.5342	1.52514e-10
IL18RAP	1.33692e-16	1.41788	22.5073	8.8955e-16
SAP30	1.47776e-14	1.62728	22.506	7.60892e-14
PHC2	2.40019e-16	1.44075	22.5042	1.53744e-15
CREG1	3.92318e-20	1.15695	22.4522	4.27549e-19
PLAGL2	1.28977e-16	1.41051	22.4123	8.60368e-16
LILRB2	1.58502e-22	1.02463	22.3369	2.31842e-21
CHMP4B	1.06677e-20	1.11711	22.3108	1.25956e-19
HP	2.87947e-13	1.77165	22.2177	1.24821e-12
RRBP1	6.51425e-20	1.15735	22.205	6.85708e-19
LITAF	8.26918e-20	1.15785	22.0946	8.54074e-19
LTB4R	8.70304e-21	1.09927	22.0518	1.0393e-19
CALCOCO2	6.81695e-22	1.04175	22.0502	9.17659e-21
SMAD1	2.52683e-21	1.068	21.9981	3.19993e-20
NAGK	3.1176e-22	1.02043	21.9456	4.35923e-21
SPI1	3.56796e-18	1.25574	21.9096	2.93998e-17
PHF1	7.48053e-18	1.27703	21.8705	5.80753e-17
PSME2	6.76156e-21	1.08379	21.8601	8.20554e-20
FANCA	3.67805e-19	1.1855	21.8539	3.44545e-18
TFG	1.28555e-20	1.09726	21.8255	1.49762e-19
GPR141	9.85317e-19	1.20891	21.7682	8.74511e-18
IL15RA	2.8019e-19	1.17134	21.7314	2.66767e-18
LONRF3	5.05326e-18	1.25487	21.7047	4.07099e-17
DUSP1	1.24314e-14	1.54143	21.4343	6.45805e-14
DNAJC19P5	4.43134e-17	1.30414	21.3272	3.11473e-16
ZNF702P	8.52708e-17	1.31468	21.1259	5.81785e-16
LCP2	1.49078e-19	1.11385	20.9699	1.48978e-18
NOD2	1.78898e-16	1.32192	20.8168	1.1659e-15
RTCB	2.46555e-20	1.05643	20.7146	2.77057e-19
MGAM2	7.81334e-18	1.20956	20.6922	6.04351e-17
CEACAM3	2.4638e-19	1.10739	20.6068	2.36512e-18
SERPINA1	2.97035e-17	1.24461	20.5699	2.13218e-16
OSCAR	3.11061e-18	1.17152	20.51	2.59168e-17
BAK1	2.645e-17	1.23515	20.4759	1.91042e-16
TLE3	8.95437e-16	1.35912	20.452	5.33746e-15
C17orf67	1.02231e-18	1.12953	20.3206	9.04276e-18
ETF1	3.94179e-20	1.04388	20.2559	4.2913e-19
STX3	1.95165e-18	1.1431	20.2438	1.66718e-17
EMILIN2	4.20683e-20	1.03658	20.0847	4.56089e-19
HMOX1	5.50685e-16	1.30427	19.9019	3.36483e-15
RN7SL600P	3.68549e-17	1.21025	19.8887	2.6186e-16
AFF1	2.79811e-20	1.01508	19.8479	3.11419e-19
ARHGAP26	5.54951e-18	1.14779	19.806	4.44003e-17
SYNJ1	2.39726e-20	1.00936	19.804	2.69673e-19
OR52K3P	3.59228e-19	1.07223	19.7768	3.36812e-18
GZF1	7.25248e-15	1.39731	19.7572	3.86738e-14
LILRB3	2.53046e-16	1.26543	19.7367	1.61299e-15
CD163	1.00217e-12	1.64386	19.7248	4.01058e-12
PLP2	7.52975e-18	1.14412	19.5909	5.84142e-17
DOCK8-AS1	2.83849e-18	1.11482	19.5616	2.38393e-17
NAIPP2	1.72273e-16	1.2401	19.5486	1.12552e-15
TRIM21	9.74971e-19	1.08498	19.5417	8.67534e-18
VEGFA	1.18588e-11	1.77478	19.3912	4.14915e-11
KLF10	2.8444e-13	1.5446	19.3785	1.23352e-12
AK4	3.10344e-13	1.54625	19.3408	1.3392e-12
RIPK3	5.59343e-18	1.12077	19.336	4.46835e-17
METRNL	5.49596e-16	1.2622	19.2612	3.36014e-15
JUNB	2.58489e-17	1.15756	19.2011	1.86958e-16
PIK3R5	4.95199e-15	1.33816	19.1427	2.69834e-14
SMPDL3A	1.13623e-19	1.00979	19.1301	1.15195e-18
KCNJ2-AS1	1.82108e-15	1.29747	19.1242	1.03992e-14
CIBAR1	1.14682e-17	1.12355	19.0336	8.67818e-17
PPP1R3B	3.26058e-18	1.08652	18.9996	2.70801e-17
RHOG	1.22665e-15	1.26337	18.8385	7.12916e-15
FMR1-IT1	3.41317e-15	1.29944	18.7988	1.89534e-14
S100A11	3.05248e-19	1.01475	18.7884	2.89309e-18
PPCDC	7.18866e-16	1.23939	18.7685	4.3343e-15
MOB3C	2.12227e-17	1.12455	18.7498	1.55648e-16
SLC31A2	7.07298e-17	1.16006	18.7354	4.86378e-16
FKBP5	2.31396e-15	1.27835	18.7095	1.30925e-14
BTN2A2	1.19547e-18	1.04201	18.6755	1.05035e-17
FCGR2C	4.85124e-14	1.40254	18.6736	2.33488e-13
NLRC5	4.38489e-17	1.1309	18.4994	3.08622e-16
SLC15A3	1.03999e-15	1.23362	18.4833	6.11194e-15
RELT	5.62361e-18	1.07054	18.4667	4.48903e-17
THEMIS2	4.09045e-16	1.19495	18.3881	2.54844e-15
MKNK1	4.06905e-18	1.05432	18.3352	3.30863e-17
RNF24	1.79782e-18	1.03036	18.284	1.54459e-17
HLA-A	1.4429e-17	1.08025	18.1922	1.07862e-16
DENND3	2.43562e-17	1.09255	18.151	1.77264e-16
MPZ	1.64423e-17	1.07956	18.1193	1.22214e-16
CCDC26	6.86671e-18	1.05046	18.0293	5.37482e-17
JMJD6	1.49477e-14	1.30261	18.0091	7.69272e-14
CFAP58	9.0964e-16	1.18907	17.885	5.41595e-15
ELL	1.46999e-13	1.38341	17.7529	6.63017e-13
CD83	6.39656e-11	1.7314	17.65	2.06e-10
FZD5	2.78074e-17	1.05938	17.5389	2.00294e-16
POLR2A	1.65097e-13	1.37181	17.5348	7.39373e-13
ZNF165	1.64107e-13	1.35525	17.3267	7.35428e-13
BCL6	7.31738e-17	1.07062	17.2751	5.02195e-16
MAPKAPK2	1.10859e-15	1.15269	17.2387	6.48979e-15
CDKN1C	3.08016e-13	1.37101	17.1532	1.3297e-12
CWC25	1.33704e-17	1.01542	17.1341	1.00451e-16
HSD17B13	1.05809e-16	1.07049	17.1016	7.14468e-16
FGR	9.35471e-17	1.06656	17.0959	6.35341e-16
CBX3P2	1.25661e-17	1.00397	16.9679	9.46119e-17
FMNL1	3.52866e-14	1.26006	16.9509	1.72852e-13
IFITM2	3.24844e-13	1.34175	16.7562	1.39831e-12
CLP1	3.50386e-17	1.01731	16.7404	2.49802e-16
RAP2C-AS1	8.97838e-17	1.03941	16.6793	6.1178e-16
DOK3	9.1222e-16	1.10773	16.6601	5.42823e-15
MMP8	1.59405e-09	1.88216	16.5583	4.3127e-09
NADK	3.18216e-17	1.00295	16.5459	2.27642e-16
ZCWPW2	1.09342e-14	1.18062	16.4829	5.71998e-14
DEDD2	1.64138e-15	1.11336	16.4608	9.42442e-15
FOSL2	1.25928e-15	1.10113	16.4066	7.30662e-15
LINC00528	1.55618e-14	1.18819	16.4064	7.98917e-14
PTGES3P1	3.01119e-16	1.05683	16.4034	1.90666e-15
CD80	9.16275e-13	1.36049	16.3776	3.69225e-12
HORMAD1	1.73222e-14	1.18931	16.3666	8.79805e-14
CALR	9.4846e-16	1.0804	16.2308	5.62152e-15
PELATON	4.97826e-15	1.13443	16.2256	2.71125e-14
TP53I3	7.671e-16	1.07344	16.2252	4.60392e-15
CSNK1D	2.00413e-15	1.1034	16.2179	1.14134e-14
GBA	3.66742e-16	1.04945	16.1989	2.29581e-15
BIN3	3.37293e-15	1.11544	16.1426	1.87706e-14
ZFAS1	2.9426e-14	1.1903	16.1062	1.45367e-13
CXCL16	5.57806e-13	1.30897	16.0395	2.32652e-12
VDR	8.45283e-15	1.13889	16.0276	4.4733e-14
GK	1.87289e-15	1.08604	15.9947	1.06834e-14
SLC16A3	7.71897e-14	1.21512	15.9332	3.61542e-13
SQSTM1	1.61226e-16	1.00418	15.8587	1.0593e-15
S100A9	1.26527e-14	1.13756	15.8096	6.56976e-14
OR2B6	1.35587e-13	1.21615	15.6492	6.14986e-13
FAM157B	1.904e-12	1.32633	15.5451	7.35273e-12
CAPG	6.44156e-14	1.17824	15.5421	3.05398e-13
FLOT1	4.89716e-14	1.16665	15.5282	2.3559e-13
PTK2B	2.78475e-15	1.04294	15.1802	1.56212e-14
JDP2	5.53913e-13	1.23752	15.1677	2.31356e-12
TNFAIP2	1.06835e-13	1.16791	15.1493	4.90524e-13
OR52K1	7.70807e-14	1.14595	15.0269	3.61193e-13
RN7SL141P	3.01332e-12	1.30055	14.9836	1.13397e-11
LRRN1	5.4574e-14	1.12743	14.9531	2.6182e-13
RNF144B	4.1963e-13	1.19472	14.7872	1.78143e-12
JUN	4.0892e-13	1.18706	14.7057	1.73808e-12
CD82	2.38253e-12	1.26288	14.6784	9.06036e-12
NAMPTP1	8.78114e-13	1.19646	14.425	3.55214e-12
MAPK10	1.33295e-13	1.10777	14.2627	6.05113e-13
CXCR1	5.62332e-14	1.07069	14.1867	2.69164e-13
NXT1	3.27773e-11	1.34668	14.1192	1.09358e-10
SLC25A28	2.60738e-13	1.10865	13.951	1.13496e-12
MIR22HG	1.78838e-09	1.59344	13.9387	4.80373e-09
KCNJ2	4.9641e-14	1.04554	13.91	2.38701e-13
IFNGR2	2.34427e-14	1.01531	13.8387	1.17415e-13
S100A8	7.46432e-14	1.04685	13.742	3.49928e-13
PDE4B	2.32278e-12	1.17656	13.6881	8.84599e-12
CHD4	3.56098e-13	1.0897	13.5651	1.5247e-12
TNFRSF1B	8.8089e-14	1.03647	13.5312	4.09661e-13
ZEB2-AS1	1.06925e-13	1.01843	13.21	4.9072e-13
RLF	5.40816e-13	1.06857	13.1081	2.26287e-12
PIGA	5.99087e-11	1.27977	13.0824	1.93709e-10
CD38	2.24742e-13	1.02887	13.0135	9.873e-13
LOXHD1	7.71403e-12	1.15931	12.8831	2.76864e-11
ZFAND2A	7.30156e-13	1.06022	12.8675	2.99059e-12
TRAF3IP2	8.93373e-12	1.15763	12.7906	3.17917e-11
JAG1	5.03477e-13	1.0315	12.6854	2.11424e-12
MIR181A1HG	1.25254e-12	1.0648	12.6735	4.9576e-12
CYTH4	3.50859e-13	1.01589	12.6528	1.50473e-12
FCGR3B	4.14373e-12	1.11096	12.6456	1.53564e-11
HCAR3	5.61809e-12	1.11088	12.4979	2.05012e-11
SMAD7	1.58139e-11	1.15374	12.4615	5.43725e-11
CSF3R	7.15629e-13	1.02344	12.43	2.93913e-12
RNASEH2B-AS1	1.21014e-11	1.12439	12.2752	4.22884e-11
RPS15AP29	1.58901e-10	1.25098	12.2582	4.85321e-10
ANKRD33B	1.07474e-10	1.20299	11.9922	3.36999e-10
PLIN2	6.33342e-10	1.29992	11.9572	1.80384e-09
LINC01002	1.85971e-10	1.22871	11.956	5.62261e-10
MIDN	3.35487e-12	1.02177	11.7241	1.2558e-11
HILPDA	3.9756e-11	1.11539	11.6008	1.31719e-10
IL1R2	1.60405e-08	1.4841	11.5682	3.81281e-08
ZNF687	1.27607e-11	1.05752	11.5208	4.44882e-11
ZNF415P1	2.47742e-11	1.0856	11.5138	8.34008e-11
TNIP1	4.96524e-11	1.11298	11.4682	1.6225e-10
DUSP10	6.22749e-11	1.10439	11.271	2.00802e-10
CCDC97	1.52668e-11	1.03416	11.1857	5.26817e-11
MIR3136	1.03545e-08	1.38124	11.029	2.51666e-08
NEAT1	5.7993e-09	1.30929	10.7841	1.45232e-08
RPL11P3	4.23589e-11	1.03261	10.7113	1.39724e-10
FAM157C	1.11844e-10	1.07076	10.6555	3.50071e-10
APBB2	1.00002e-09	1.18018	10.6216	2.77217e-09
RPL35AP2	2.3028e-09	1.22717	10.5999	6.08342e-09
MVB12B	3.87276e-11	1.00825	10.4979	1.28515e-10
WAKMAR2	8.18784e-11	1.02848	10.3741	2.60959e-10
ITGA9	1.36515e-08	1.30971	10.3007	3.26869e-08
ARHGAP26-IT1	3.27138e-10	1.07215	10.1696	9.62933e-10
MYADM	3.92741e-09	1.2012	10.0972	1.00739e-08
FAM133DP	2.89332e-10	1.05813	10.0931	8.58649e-10
TOB1	1.79036e-08	1.28115	9.92516	4.23165e-08
NAIPP4	9.73774e-08	1.39989	9.81541	2.11452e-07
RN7SL288P	4.68621e-10	1.02678	9.57905	1.35352e-09
NCF1	2.37088e-09	1.11018	9.57539	6.24661e-09
BMF	1.28516e-08	1.19808	9.45413	3.09271e-08
POFUT2	1.28581e-09	1.05679	9.39572	3.51324e-09
HK3	3.80229e-09	1.09801	9.24519	9.77213e-09
RN7SKP16	9.84442e-08	1.31245	9.19609	2.13724e-07
TSPYL2	3.03911e-09	1.06794	9.09591	7.9038e-09
NLRP9P1	5.99829e-09	1.10487	9.08418	1.49857e-08
NDUFV2	9.32867e-09	1.07332	8.61892	2.28056e-08
TREM1	1.48205e-08	1.09439	8.56812	3.53484e-08
SIDT2	5.15991e-09	1.00797	8.35344	1.29997e-08
JUND	9.91419e-09	1.01177	8.09794	2.41356e-08
GCNT1P3	1.55498e-08	1.03383	8.07243	3.7012e-08
ZBTB16	1.73037e-07	1.12751	7.62405	3.64046e-07
RBMS2	1.01839e-07	1.01407	7.09045	2.20636e-07
RPS16P5	2.61842e-07	1.05454	6.94093	5.38123e-07
SAMD4B	3.19361e-07	1.02982	6.68944	6.50207e-07
HBB	0.001306	2.03326	5.86404	0.00176419
OLFM4	0.00017464	1.50152	5.6425	0.000258298
PLPP3	1.87867e-05	1.07728	5.0914	3.10778e-05
CD1C	1.18993e-38	-2.71604	-103.005	1.83267e-36
GRAMD1C	1.62245e-35	-2.59238	-90.1886	1.4279e-33
BRI3BP	2.52234e-38	-1.81976	-68.4196	3.6187e-36
PID1	2.53354e-31	-2.12216	-64.9301	1.14865e-29
EIF4B	2.12944e-47	-1.26006	-58.809	5.57542e-44
EIF3L	1.32086e-43	-1.35022	-57.8963	6.28791e-41
GZMK	9.21475e-30	-1.81252	-52.6275	3.44043e-28
CPA3	1.59695e-24	-2.19975	-52.3467	3.06877e-23
CNTNAP3	1.63015e-21	-2.48265	-51.6087	2.10254e-20
NT5E	1.75347e-24	-2.16757	-51.493	3.35112e-23
IL5RA	2.59911e-20	-2.54709	-49.8852	2.91129e-19
DSC1	7.23678e-22	-2.34166	-49.5037	9.71677e-21
LINC02397	7.45836e-24	-2.11354	-48.8807	1.31722e-22
CCN3	2.36197e-22	-2.11812	-45.808	3.36556e-21
CASS4	4.2233e-28	-1.66854	-45.6751	1.27466e-26
ZNF860	1.37509e-21	-2.17513	-45.3768	1.78676e-20
SNRPD3	5.47437e-37	-1.22768	-44.5178	6.03506e-35
CR2	3.01159e-23	-1.93128	-43.4947	4.80799e-22
CACNA2D3	5.47524e-25	-1.79225	-43.4828	1.13101e-23
CACNB4	5.72055e-25	-1.73815	-42.1372	1.16559e-23
INPP4B	9.42827e-29	-1.47723	-41.4002	3.07608e-27
DPP4	4.38198e-27	-1.55622	-41.0194	1.18893e-25
NUDT3	1.0698e-34	-1.17843	-40.0321	7.89014e-33
RFLNB	1.98877e-30	-1.34081	-39.8238	8.04183e-29
THEM4	9.36604e-26	-1.5852	-39.6751	2.14171e-24
NELL2	1.38246e-21	-1.89486	-39.5255	1.79412e-20
ABCD2	1.00585e-23	-1.66923	-38.3881	1.72976e-22
PAIP2B	4.36502e-25	-1.57386	-38.3392	9.14297e-24
SLC16A10	7.67936e-23	-1.73024	-38.2637	1.16055e-21
RPL5	4.79485e-32	-1.22037	-38.221	2.43769e-30
SDC2	4.26339e-24	-1.62057	-37.8732	7.80604e-23
FITM2	1.40945e-25	-1.52246	-37.8346	3.15409e-24
OSBPL10	9.4625e-24	-1.63529	-37.6508	1.63803e-22
VSIG1	1.72253e-23	-1.64422	-37.4288	2.85443e-22
RPS6KA5	1.33021e-30	-1.22975	-36.7402	5.55031e-29
RPL4	2.96318e-31	-1.19394	-36.449	1.33191e-29
LRRN3	5.44583e-17	-2.20929	-35.9317	3.79217e-16
ADGRE3	1.3332e-22	-1.62937	-35.6426	1.97212e-21
NUDT5	1.12859e-28	-1.27035	-35.5031	3.60358e-27
COCH	2.1269e-23	-1.55621	-35.2828	3.49687e-22
RPL22	4.60523e-31	-1.16125	-35.2284	2.02649e-29
NOG	5.40675e-16	-2.30393	-35.1743	3.31527e-15
ZNF781	1.877e-19	-1.85953	-34.8225	1.84235e-18
FCER1A	6.5411e-19	-1.89017	-34.3714	5.91069e-18
RCAN3	1.34183e-24	-1.42239	-33.9558	2.6024e-23
CAMK1D	1.08387e-28	-1.2121	-33.8965	3.48203e-27
PCYOX1	3.05328e-26	-1.32701	-33.859	7.55957e-25
FCRLA	3.86056e-18	-1.93938	-33.7711	3.15888e-17
RPL6	3.26034e-32	-1.06855	-33.6453	1.68204e-30
CD200R1	2.37199e-23	-1.48109	-33.5094	3.86944e-22
RPL3	3.28801e-26	-1.30354	-33.2182	8.04563e-25
TC2N	5.99249e-28	-1.21187	-32.99	1.78802e-26
PIGX	4.85349e-26	-1.29849	-32.8698	1.16317e-24
LINC00402	3.44913e-20	-1.6685	-32.4729	3.78645e-19
ADGRE4P	4.01802e-16	-2.09995	-32.3308	2.50657e-15
HRH4	1.70833e-17	-1.92614	-32.2964	1.2644e-16
EEF1B2	1.25649e-27	-1.18154	-31.7844	3.62513e-26
RPS23	8.35818e-30	-1.08996	-31.6936	3.13746e-28
ATM	2.9805e-28	-1.12934	-31.0859	9.20789e-27
HOPX	5.81242e-21	-1.52683	-30.8964	7.12804e-20
PATJ	1.1476e-24	-1.28872	-30.8523	2.25072e-23
BACE2	1.00141e-22	-1.38251	-30.4143	1.49825e-21
FAM184A	8.26379e-20	-1.59299	-30.3987	8.54074e-19
GCSAM	6.49704e-20	-1.58059	-30.3272	6.85232e-19
RPL10A	8.50413e-27	-1.14892	-29.9528	2.23217e-25
RPGRIP1	6.19348e-21	-1.46661	-29.6373	7.55995e-20
RPS3AP6	2.26949e-23	-1.30522	-29.5556	3.71381e-22
ITGA6	1.69669e-21	-1.417	-29.4317	2.18567e-20
CCDC141	2.60581e-22	-1.35761	-29.3028	3.68295e-21
RPS3A	2.16897e-26	-1.13571	-29.1465	5.50016e-25
SDR42E1	4.08713e-24	-1.24464	-29.1104	7.49641e-23
AK5	2.13977e-19	-1.5551	-29.0332	2.07883e-18
NT5DC1	2.25084e-26	-1.1145	-28.5844	5.66659e-25
EEF1A1	1.96094e-28	-1.02633	-28.4372	6.14879e-27
TRIM2	1.25634e-21	-1.3542	-28.304	1.63856e-20
LINC00920	3.04806e-17	-1.71365	-28.3026	2.18347e-16
B3GALT2	8.64062e-15	-2.00205	-28.1558	4.56806e-14
NLRC3	3.04745e-23	-1.24854	-28.1122	4.85045e-22
AGMAT	5.1267e-18	-1.62564	-28.1076	4.11748e-17
EEF1A1P5	5.6612e-25	-1.15432	-27.9888	1.15806e-23
CHRM3-AS2	1.31212e-18	-1.56341	-27.9569	1.14802e-17
KIT	1.68391e-20	-1.41243	-27.929	1.94653e-19
SACS	9.45411e-24	-1.21244	-27.9156	1.63803e-22
SGK1	6.16427e-22	-1.30938	-27.772	8.33012e-21
CD96	6.97955e-27	-1.05868	-27.691	1.85997e-25
SSPN	3.4491e-18	-1.58195	-27.6245	2.85327e-17
FCMR	1.15214e-19	-1.45477	-27.5511	1.16583e-18
HVCN1	2.28367e-22	-1.27032	-27.4916	3.26288e-21
ZNF204P	1.02728e-17	-1.60893	-27.3331	7.82452e-17
RTN1	6.07559e-20	-1.40629	-27.0238	6.44025e-19
TTC9	2.1954e-22	-1.24192	-26.8982	3.14534e-21
ABCC5	2.29256e-25	-1.0868	-26.7784	4.99169e-24
EEF2K	6.07694e-23	-1.20474	-26.7649	9.33193e-22
TMEM204	1.43627e-17	-1.58632	-26.718	1.0752e-16
FCRL2	2.25233e-17	-1.60137	-26.6587	1.64725e-16
RPL6P27	1.39708e-23	-1.14954	-26.2724	2.35235e-22
ZNF84	7.43273e-24	-1.13457	-26.2412	1.31492e-22
CNR2	4.56614e-19	-1.4239	-26.1149	4.21704e-18
DPEP2	5.27244e-18	-1.51095	-26.1061	4.22804e-17
ZNF30	9.77083e-19	-1.44674	-26.056	8.68675e-18
SCAI	3.80294e-25	-1.06232	-25.9418	8.0624e-24
TBC1D9	3.21682e-22	-1.20309	-25.8576	4.48598e-21
USP13	2.64774e-21	-1.25435	-25.8109	3.34093e-20
COL19A1	1.72779e-17	-1.53098	-25.663	1.27791e-16
TRAC	2.38027e-18	-1.45403	-25.6249	2.01362e-17
LINC01550	7.38501e-18	-1.49513	-25.614	5.73762e-17
RPL13A	1.39943e-25	-1.02672	-25.5182	3.13838e-24
FCRL3	2.71079e-20	-1.30273	-25.4904	3.02022e-19
CYBRD1	3.03339e-22	-1.18445	-25.487	4.25284e-21
ZNF248	1.0195e-25	-1.01707	-25.4183	2.32114e-24
RPS8	1.71383e-23	-1.11375	-25.3556	2.84453e-22
NRG1	4.06248e-16	-1.64558	-25.3275	2.53252e-15
FCRL1	2.10936e-17	-1.51348	-25.2385	1.5481e-16
CLC	5.29884e-13	-2.04987	-25.1639	2.21979e-12
NMT2	5.99791e-23	-1.12628	-25.0281	9.23766e-22
IFNG-AS1	2.86259e-20	-1.26536	-24.7292	3.17584e-19
TRBV3-1	1.1673e-16	-1.55137	-24.7177	7.84666e-16
USP44	3.99904e-17	-1.50616	-24.6981	2.82223e-16
LIMA1	9.73048e-20	-1.29483	-24.6171	9.97136e-19
SEPTIN1	9.16503e-18	-1.44407	-24.6039	7.02674e-17
PKIA	5.76109e-22	-1.15394	-24.5091	7.83583e-21
DPH5	6.49306e-22	-1.15627	-24.4986	8.76312e-21
RPS6	1.24763e-22	-1.11764	-24.4807	1.84815e-21
LRIG1	4.63253e-25	-1.0045	-24.4438	9.66463e-24
ZNF540	8.59572e-20	-1.2788	-24.3811	8.85181e-19
TRBC2	7.27845e-21	-1.20482	-24.2627	8.78194e-20
KLRB1	8.28902e-20	-1.27039	-24.2409	8.5499e-19
SPEF2	6.19799e-24	-1.04395	-24.2277	1.1096e-22
ZNF831	1.63107e-22	-1.10734	-24.1262	2.37914e-21
RPS3AP26	1.07204e-20	-1.20779	-24.1194	1.26435e-19
ZNF439	2.2705e-22	-1.11168	-24.061	3.24849e-21
TBC1D4	2.29346e-20	-1.21822	-23.9252	2.5883e-19
CRIM1	1.7228e-20	-1.2097	-23.9082	1.98491e-19
LEF1-AS1	6.62096e-16	-1.57244	-23.8682	4.00585e-15
THEMIS	1.39764e-18	-1.3365	-23.8627	1.21776e-17
MAP7	2.30848e-19	-1.27922	-23.8404	2.23032e-18
PDE4DIP	3.76985e-22	-1.11178	-23.8183	5.21554e-21
CLEC17A	2.48491e-15	-1.63066	-23.8153	1.40143e-14
N6AMT1	1.05798e-19	-1.25501	-23.8145	1.07994e-18
ECI2	2.50171e-22	-1.09416	-23.6358	3.54539e-21
CNKSR2	4.88308e-19	-1.27704	-23.3844	4.48994e-18
MS4A1	7.45386e-17	-1.44069	-23.2349	5.10892e-16
PAQR8	1.80157e-17	-1.38548	-23.199	1.32779e-16
PCDH9	1.99517e-16	-1.47681	-23.1859	1.28984e-15
LINC00861	3.04716e-17	-1.39931	-23.1112	2.18347e-16
EIF4BP3	1.82182e-20	-1.16395	-22.9757	2.0921e-19
FMO5	2.36137e-23	-1.0139	-22.9414	3.85814e-22
AMIGO1	2.01174e-15	-1.56101	-22.9412	1.14505e-14
TRAF5	5.00347e-21	-1.12859	-22.9112	6.1867e-20
TTN	2.33171e-19	-1.21838	-22.7013	2.2507e-18
ZNF559	3.85662e-18	-1.30336	-22.6964	3.15888e-17
PRKCQ-AS1	5.03921e-20	-1.17288	-22.6337	5.41402e-19
IGIP	3.52681e-18	-1.29531	-22.6065	2.91296e-17
RPS4X	5.65131e-21	-1.1149	-22.5744	6.96308e-20
HRK	1.68211e-15	-1.52484	-22.5282	9.65301e-15
COLGALT2	8.56942e-16	-1.49391	-22.5088	5.11382e-15
ZNF793	6.45276e-18	-1.30907	-22.5032	5.08118e-17
TRABD2A	2.06647e-17	-1.34256	-22.4003	1.51768e-16
METTL2B	2.39033e-20	-1.1383	-22.3352	2.69183e-19
CDHR3	1.86621e-19	-1.19131	-22.3121	1.83347e-18
ZNF404	3.10071e-14	-1.64154	-22.1748	1.53106e-13
SPRED1	3.75165e-17	-1.34857	-22.1512	2.65839e-16
ZNF287	7.2191e-18	-1.29202	-22.1471	5.62961e-17
GVQW3	4.9627e-19	-1.20914	-22.1324	4.55915e-18
ZNF91	1.61612e-22	-1.0092	-21.992	2.36061e-21
LDHB	1.11191e-21	-1.0494	-21.989	1.45745e-20
THNSL1	3.01977e-16	-1.4127	-21.9251	1.91094e-15
CAT	1.47082e-21	-1.04943	-21.8623	1.90171e-20
LINC02273	2.1228e-14	-1.59876	-21.86	1.06885e-13
PTPRK	5.26587e-16	-1.43063	-21.8579	3.24027e-15
DPH6	7.89071e-22	-1.0237	-21.603	1.05592e-20
IMPDH2	1.37734e-17	-1.27817	-21.5511	1.0333e-16
SEC22B4P	1.07462e-17	-1.26877	-21.5294	8.14955e-17
ZNF599	1.70012e-17	-1.28192	-21.4972	1.26011e-16
ZFYVE9	2.00956e-19	-1.14292	-21.369	1.95992e-18
LCK	1.47835e-16	-1.34739	-21.3295	9.78063e-16
MIR600HG	6.19941e-14	-1.61427	-21.3207	2.94718e-13
GCNT4	1.46574e-16	-1.33886	-21.1995	9.70332e-16
ZNF181	9.36055e-17	-1.31118	-21.0165	6.35341e-16
IRAK1BP1	2.26694e-20	-1.06633	-20.9476	2.56287e-19
DYNC2H1	5.34227e-21	-1.02577	-20.7947	6.59783e-20
CDCA7L	2.50488e-18	-1.17261	-20.6394	2.11391e-17
HLA-DOA	1.42502e-15	-1.39006	-20.6371	8.23176e-15
TRAV17	9.74495e-17	-1.28433	-20.5637	6.60148e-16
PTGDR	8.39737e-16	-1.36248	-20.5405	5.0226e-15
ZCCHC18	1.92415e-18	-1.15673	-20.4923	1.64772e-17
HDAC9	5.97606e-21	-1.01228	-20.4719	7.31159e-20
ZNF527	1.47915e-19	-1.07992	-20.3349	1.47957e-18
TRBC1	2.97378e-17	-1.22808	-20.2962	2.13318e-16
C12orf42	5.7422e-18	-1.1752	-20.2615	4.55936e-17
ZNF208	4.24427e-14	-1.51434	-20.2501	2.05693e-13
CD40LG	7.10225e-20	-1.05601	-20.2211	7.41594e-19
MEGF6	4.16866e-16	-1.31442	-20.2157	2.591e-15
OSGEPL1	5.2275e-18	-1.16847	-20.1932	4.19522e-17
DOCK9	7.79841e-20	-1.05561	-20.1707	8.08641e-19
PTGS2	2.80913e-13	-1.60477	-20.1422	1.21923e-12
FGFR2	1.18304e-13	-1.55755	-20.1344	5.40103e-13
TRAV12-1	8.40338e-16	-1.33383	-20.1083	5.02332e-15
AKAP12	3.75932e-15	-1.39009	-20.052	2.07436e-14
ZNF382	3.22614e-17	-1.20783	-19.9187	2.30316e-16
ZNF891	5.76342e-19	-1.09183	-19.9142	5.23506e-18
CBX1	1.92568e-19	-1.06325	-19.8991	1.88483e-18
TRAV9-2	6.97502e-15	-1.39875	-19.8013	3.72829e-14
ZNF737	1.23046e-19	-1.0437	-19.7363	1.24029e-18
IKBIP	3.2577e-15	-1.35637	-19.6498	1.81554e-14
NIBAN3	3.38319e-15	-1.35151	-19.5573	1.88169e-14
SATB1-AS1	8.49344e-19	-1.08116	-19.5376	7.60272e-18
CD302	1.42824e-18	-1.09458	-19.533	1.24235e-17
ARL10	9.47169e-16	-1.29739	-19.4914	5.61704e-15
TRIM32	1.78409e-17	-1.15472	-19.34	1.31769e-16
GLIPR1	1.60831e-19	-1.02805	-19.3208	1.59808e-18
LINC01184	6.42327e-19	-1.06104	-19.3027	5.80923e-18
LINC01934	3.69225e-19	-1.04538	-19.2693	3.45567e-18
TCL1A	6.57825e-12	-1.72299	-19.2663	2.3847e-11
UBASH3A	1.3061e-14	-1.38677	-19.254	6.76835e-14
TRAV4	8.87593e-14	-1.46402	-19.1081	4.12595e-13
LINC01963	2.30601e-15	-1.30401	-19.087	1.30616e-14
ARL6	5.13827e-16	-1.24782	-19.0782	3.16548e-15
ZNF354C	5.54649e-17	-1.17091	-19.0343	3.8597e-16
ZNF658	7.88471e-15	-1.33837	-18.8753	4.18746e-14
HECW2-AS1	2.1504e-15	-1.28476	-18.8442	1.22e-14
MSANTD2	1.19225e-18	-1.04897	-18.8013	1.0484e-17
TRAV12-2	1.0214e-13	-1.44359	-18.7534	4.70618e-13
MOSMO	3.99728e-18	-1.07196	-18.6502	3.2528e-17
RPS27AP16	5.54389e-18	-1.07867	-18.6138	4.43893e-17
SLC4A10	7.29625e-13	-1.5332	-18.6083	2.98958e-12
IL7R	9.13734e-17	-1.15789	-18.5716	6.21399e-16
LINC00926	6.38574e-15	-1.30813	-18.5686	3.42612e-14
TRAV23DV6	4.32033e-13	-1.49578	-18.4945	1.82963e-12
GGTA1	1.1857e-15	-1.23533	-18.4386	6.90646e-15
TNFRSF9	4.09998e-16	-1.19825	-18.4377	2.55286e-15
LINC02210	1.20161e-16	-1.15471	-18.3833	8.06697e-16
CXCR6	4.23324e-14	-1.36862	-18.303	2.05253e-13
MBLAC2	1.79969e-17	-1.09298	-18.3017	1.32733e-16
MYO1B	1.46213e-15	-1.22762	-18.2118	8.43687e-15
PCYOX1L	9.23038e-19	-1.0048	-18.1214	8.23422e-18
FBLN5	1.46778e-12	-1.52964	-18.1008	5.74443e-12
KLRG1	1.53614e-14	-1.30926	-18.0856	7.89401e-14
COX10-AS1	8.64124e-18	-1.05184	-17.948	6.63974e-17
SYNJ2BP	1.25015e-18	-1.00139	-17.9279	1.09563e-17
LEF1	3.98541e-15	-1.24468	-17.9227	2.19333e-14
ZNF420	2.53762e-17	-1.07129	-17.7786	1.84043e-16
ATP6V0E2	2.17514e-15	-1.21229	-17.7752	1.23269e-14
ZNF285	9.24935e-14	-1.36237	-17.757	4.29001e-13
ZNF594	6.71441e-15	-1.2521	-17.746	3.59509e-14
PLEKHA1	6.73482e-18	-1.02835	-17.6586	5.29136e-17
TRAV8-3	1.05307e-13	-1.36039	-17.6545	4.84144e-13
MRTFB	6.74447e-17	-1.09041	-17.633	4.65315e-16
RPL13	1.22241e-16	-1.10634	-17.605	8.19607e-16
CLEC9A	6.56403e-14	-1.32897	-17.5195	3.10392e-13
PLEKHG3	3.42367e-16	-1.13102	-17.4919	2.15223e-15
FAM30A	1.64096e-15	-1.17734	-17.4069	9.42442e-15
DTD2	1.41675e-16	-1.09563	-17.3643	9.40283e-16
ANKEF1	3.13103e-16	-1.11934	-17.3545	1.97776e-15
C21orf62-AS1	5.38084e-16	-1.12968	-17.2493	3.30132e-15
MPZL1	6.3137e-15	-1.21465	-17.2476	3.39268e-14
BACH2	1.70287e-16	-1.08717	-17.1433	1.11394e-15
CD8B	7.96522e-15	-1.21461	-17.1246	4.22807e-14
RPLP0	1.02463e-16	-1.07023	-17.1124	6.92318e-16
KAT14	2.51657e-15	-1.16958	-17.0749	1.41852e-14
LINC02325	4.46081e-15	-1.18898	-17.0625	2.44469e-14
EOMES	5.57204e-15	-1.18609	-16.9066	3.0127e-14
ZNF583	1.78665e-15	-1.14364	-16.8664	1.02137e-14
CD244	6.42809e-16	-1.10158	-16.7351	3.89141e-15
AFF3	6.32179e-15	-1.17728	-16.7164	3.39355e-14
TRAV13-1	2.59923e-14	-1.22483	-16.6395	1.29627e-13
TAS2R14	2.63359e-15	-1.14074	-16.6314	1.48049e-14
NR3C2	9.42103e-16	-1.10659	-16.6275	5.59333e-15
ZNF33B	3.60012e-17	-1.0089	-16.59	2.5649e-16
TRBV12-4	4.91922e-12	-1.466	-16.5777	1.80712e-11
TRBV14	8.66424e-14	-1.26295	-16.497	4.03471e-13
ZFP37	6.04063e-13	-1.34616	-16.4486	2.50648e-12
TIGIT	6.22424e-15	-1.15673	-16.4323	3.34633e-14
GEMIN6	3.52717e-15	-1.12948	-16.3239	1.95553e-14
ZFP28	8.72606e-15	-1.15682	-16.264	4.6109e-14
MME	8.9441e-13	-1.34743	-16.2345	3.61248e-12
EPHX2	1.20745e-13	-1.24996	-16.1471	5.50769e-13
A2M-AS1	7.80036e-13	-1.33346	-16.1454	3.17625e-12
ACTL6A	2.04532e-16	-1.02356	-16.059	1.319e-15
TRAV1-2	9.13312e-12	-1.45301	-16.0403	3.24021e-11
PDGFD	9.99355e-16	-1.0649	-15.9738	5.88984e-15
SNX22	7.79266e-14	-1.21479	-15.9239	3.64667e-13
ZNF681	3.1181e-15	-1.0931	-15.8566	1.74258e-14
LINC02648	4.68518e-14	-1.18791	-15.8339	2.26015e-13
TRBV19	2.97015e-13	-1.26158	-15.8042	1.28539e-12
ZNF607	5.55499e-13	-1.28783	-15.7827	2.31783e-12
LINC01871	5.96023e-15	-1.1058	-15.7297	3.21429e-14
WLS	1.60616e-11	-1.45584	-15.7146	5.5206e-11
ACVR1C	1.80034e-13	-1.2305	-15.6823	8.01996e-13
GDF11	1.12737e-12	-1.31049	-15.6577	4.48252e-12
ANGPT1	5.36734e-16	-1.02352	-15.6294	3.29497e-15
GALNT12	6.97741e-15	-1.10357	-15.6224	3.72829e-14
SNORD13	5.46275e-16	-1.01941	-15.5588	3.34374e-15
BCL11B	5.92605e-16	-1.01917	-15.5192	3.60415e-15
CKMT2-AS1	5.80201e-14	-1.16846	-15.4662	2.77084e-13
UNG	9.45771e-16	-1.02871	-15.4556	5.61193e-15
RPS18	1.04054e-15	-1.02839	-15.4082	6.11194e-15
GPR34	1.13814e-10	-1.54677	-15.3807	3.55919e-10
IKZF2	1.03235e-15	-1.02576	-15.3723	6.07062e-15
QARS1	6.68168e-16	-1.00577	-15.2627	4.04026e-15
C5orf63	9.63487e-16	-1.01594	-15.2555	5.69768e-15
WDR92	5.91183e-13	-1.24665	-15.2443	2.4579e-12
PARM1	3.54956e-13	-1.21711	-15.1528	1.52043e-12
TTC3P1	4.76992e-13	-1.22792	-15.1298	2.00624e-12
RPP40	2.03696e-12	-1.29203	-15.1051	7.82579e-12
NT5C3AP2	3.56276e-14	-1.11724	-15.0249	1.7444e-13
ZNF71	1.12425e-15	-1.00362	-15.0032	6.57047e-15
TRAV14DV4	9.7165e-13	-1.2476	-14.9868	3.90188e-12
JPT2	1.38656e-15	-1.00376	-14.914	8.01846e-15
FAM111B	7.16347e-13	-1.2247	-14.8738	2.94093e-12
ZNF582	2.97695e-15	-1.02262	-14.8548	1.66636e-14
TRBV5-1	4.65532e-12	-1.30949	-14.8392	1.71673e-11
ESYT1	3.86436e-13	-1.1946	-14.8285	1.64874e-12
AKAP6	1.61001e-13	-1.15677	-14.7988	7.23365e-13
TRBV2	1.59733e-12	-1.25201	-14.7694	6.22121e-12
MAL	1.3965e-13	-1.14803	-14.7578	6.32047e-13
SIGLEC6	1.99002e-12	-1.26032	-14.7472	7.65949e-12
SLAMF6	3.4829e-14	-1.09415	-14.7252	1.7085e-13
ZNF69	6.10359e-15	-1.03588	-14.7244	3.28589e-14
ZNF658B	2.35508e-13	-1.16155	-14.6681	1.03157e-12
LINC01534	3.96642e-15	-1.01716	-14.6488	2.18403e-14
HLA-DOB	1.28007e-14	-1.05358	-14.6371	6.6433e-14
TRAV12-3	5.19174e-13	-1.18974	-14.6156	2.17754e-12
RPS5	1.4088e-13	-1.13669	-14.6077	6.37336e-13
ZNF354A	6.02951e-15	-1.01745	-14.4679	3.2483e-14
CCDC65	2.52154e-13	-1.14706	-14.451	1.09896e-12
MAGEH1	2.52467e-14	-1.05819	-14.3891	1.26029e-13
ACVR2B	1.02202e-14	-1.02789	-14.3808	5.36524e-14
RPL10	2.08308e-14	-1.04947	-14.3582	1.05037e-13
ANTXRLP1	1.08779e-12	-1.18955	-14.2311	4.32844e-12
SIGLEC10	2.23293e-14	-1.04206	-14.2253	1.12214e-13
CD3G	1.41893e-14	-1.02548	-14.2008	7.31679e-14
FUT10	1.96664e-14	-1.03073	-14.1275	9.93908e-14
CYSLTR2	3.16304e-14	-1.04537	-14.1123	1.55743e-13
CD22	8.37575e-13	-1.15944	-14.0025	3.39734e-12
WDCP	1.66651e-14	-1.01342	-13.9631	8.50141e-14
TLR10	4.91942e-12	-1.22927	-13.9007	1.80712e-11
FSBP	8.27789e-13	-1.15032	-13.8983	3.36024e-12
GPRASP2	2.07203e-13	-1.09233	-13.8546	9.15628e-13
TMEM42	1.91208e-13	-1.08632	-13.8163	8.48166e-13
JAKMIP2	2.18538e-12	-1.18063	-13.7667	8.35616e-12
IPO5P1	1.94056e-14	-1.00239	-13.7448	9.81809e-14
TRBV10-3	2.49186e-11	-1.29339	-13.7144	8.37523e-11
MAN1C1	7.03216e-13	-1.12636	-13.6885	2.89042e-12
MRI1	3.31071e-14	-1.01517	-13.6845	1.62784e-13
CMTM2	2.90717e-12	-1.18596	-13.6818	1.09639e-11
TRAV13-2	2.67014e-12	-1.18187	-13.6783	1.00991e-11
BMPR1A	8.74384e-14	-1.04505	-13.6465	4.06997e-13
LINC00539	4.33842e-12	-1.20091	-13.6455	1.60439e-11
FBL	6.11268e-14	-1.03223	-13.6397	2.90991e-13
TRAV16	3.63454e-12	-1.18782	-13.5882	1.35316e-11
CAMK4	5.63426e-14	-1.01622	-13.4641	2.69441e-13
CD3D	1.13737e-13	-1.03771	-13.4323	5.19933e-13
ZFP14	9.02076e-14	-1.02132	-13.3229	4.19141e-13
ATP8B2	1.03948e-12	-1.1082	-13.2798	4.14722e-12
ZNF626	8.85517e-13	-1.10122	-13.2728	3.57932e-12
CIITA	6.46528e-13	-1.08519	-13.2279	2.66683e-12
KCNH8	7.73808e-13	-1.09158	-13.2205	3.15457e-12
PLPP1	2.03204e-13	-1.03611	-13.1503	8.99474e-13
TMCC1-DT	1.03023e-12	-1.09284	-13.1	4.11191e-12
SNORA22	5.41931e-13	-1.0591	-12.991	2.26663e-12
CD200	3.83076e-11	-1.23773	-12.8931	1.27162e-10
YAE1	2.52557e-13	-1.02004	-12.8501	1.10026e-12
ABCB4	3.24032e-13	-1.02465	-12.7973	1.39539e-12
SIT1	7.67453e-12	-1.13614	-12.6281	2.75541e-11
ALDH18A1	5.5299e-13	-1.02474	-12.5606	2.31104e-12
ZNF239	1.30861e-10	-1.26452	-12.4975	4.05836e-10
KLHL14	9.08517e-11	-1.24227	-12.4745	2.88418e-10
ZNF286B	7.63559e-13	-1.02416	-12.41	3.114e-12
ZNF485	1.00799e-11	-1.12298	-12.3489	3.55203e-11
MICU3	9.47542e-12	-1.11472	-12.288	3.34579e-11
GATM	1.55809e-11	-1.13103	-12.2235	5.36066e-11
SNORA23	7.31526e-13	-1.00346	-12.1778	2.99502e-12
TRAV21	1.71356e-10	-1.2463	-12.1715	5.21671e-10
RNVU1-28	1.05505e-08	-1.51277	-12.067	2.56237e-08
ZNF132	2.09087e-11	-1.12845	-12.0514	7.09121e-11
KRBA2	3.76444e-12	-1.0315	-11.7842	1.39954e-11
CCR7	2.33817e-10	-1.21501	-11.7019	6.99647e-10
ZNF501	1.32576e-10	-1.16748	-11.5318	4.10668e-10
FZD6	3.59743e-12	-1.00354	-11.4845	1.34078e-11
BTLA	1.69753e-10	-1.17064	-11.4374	5.16958e-10
ZNF572	5.54732e-12	-1.01101	-11.3798	2.02499e-11
KLF8	6.65355e-12	-1.01679	-11.3647	2.40866e-11
NAP1L3	1.51761e-11	-1.03132	-11.1577	5.2386e-11
TRAV19	5.45907e-11	-1.07645	-11.0474	1.77335e-10
BTG1P1	3.4772e-10	-1.1535	-10.9107	1.02007e-09
AXIN2	8.88003e-11	-1.07407	-10.7961	2.82333e-10
BEND5	6.18543e-11	-1.05346	-10.7544	1.99507e-10
ZNF8-DT	9.18982e-11	-1.05722	-10.611	2.91387e-10
MS4A2	2.97894e-09	-1.24118	-10.5822	7.76273e-09
TRBV28	3.4679e-10	-1.11696	-10.5664	1.01763e-09
ZNF2	8.26019e-10	-1.16126	-10.5477	2.31741e-09
IGHV3-30	3.06391e-08	-1.40119	-10.5282	7.06325e-08
PASK	4.82683e-11	-1.01441	-10.465	1.58072e-10
NHS	7.96744e-10	-1.13437	-10.3212	2.23828e-09
KLF3-AS1	6.67307e-11	-1.00186	-10.1946	2.14509e-10
NSUN5P1	3.31953e-10	-1.03484	-9.80917	9.76557e-10
ELOVL4	2.94189e-10	-1.02593	-9.77848	8.72322e-10
TRAV29DV5	8.63709e-09	-1.21162	-9.77003	2.11941e-08
LIX1-AS1	2.19451e-10	-1.00837	-9.73954	6.58353e-10
TRDV2	4.87835e-08	-1.32773	-9.70798	1.09968e-07
TRIM65	2.31489e-10	-1.0049	-9.68268	6.93078e-10
GSTM3	4.85439e-09	-1.15732	-9.62182	1.2307e-08
ADAM23	4.89293e-10	-1.02438	-9.53747	1.41089e-09
LINC02158	1.76635e-09	-1.08649	-9.51	4.7482e-09
NAP1L2	3.58163e-09	-1.12379	-9.49147	9.24584e-09
LINC01781	9.67418e-09	-1.16551	-9.34089	2.35732e-08
LINC01355	6.4094e-10	-1.01188	-9.3024	1.82308e-09
CD72	8.55926e-10	-1.00863	-9.14586	2.3949e-09
TMEM169	9.67484e-10	-1.01316	-9.13302	2.68837e-09
ZNF696	2.95879e-09	-1.0701	-9.12675	7.71407e-09
LRRIQ3	1.57719e-08	-1.1587	-9.04032	3.75151e-08
LTB	5.12369e-09	-1.0709	-8.87817	1.29178e-08
NBPF3	2.25185e-09	-1.02565	-8.86925	5.95696e-09
BBS10	1.13352e-08	-1.06086	-8.42911	2.74229e-08
TCEA3	1.37323e-08	-1.03696	-8.15284	3.28652e-08
IGKV1-17	1.71694e-08	-1.01605	-7.88989	4.06455e-08
DACT1	8.06589e-08	-1.10631	-7.84743	1.76835e-07
ELAPOR1	4.39942e-07	-1.23111	-7.82567	8.79465e-07
IGLV3-1	3.27906e-08	-1.04167	-7.79612	7.53105e-08
PAX5	1.41343e-07	-1.05985	-7.25969	3.00932e-07
NEFL	5.30687e-07	-1.13459	-7.11976	1.04866e-06
ZKSCAN7	8.75421e-08	-1.00016	-7.05889	1.91205e-07
IGHM	1.74953e-06	-1.1286	-6.49742	3.24814e-06
TRGV8	3.57951e-07	-1.007	-6.49128	7.23013e-07

## Sheet: DENV
Symbol	metap	metafc	idx	metapFDRadj
KCTD14	8.7695e-161	3.45144	552.427	8.62699e-157
SPATS2L	3.58768e-162	3.37647	545.115	7.05877e-158
TCN2	1.234e-157	3.31171	519.636	6.06971e-154
SERPING1	6.46408e-146	3.50531	508.935	1.58976e-142
C1QB	5.4842e-139	3.35542	463.924	9.80924e-136
CCL2	9.40262e-120	3.78525	450.546	5.44107e-117
CXCL10	4.15898e-118	3.72626	437.392	2.15337e-115
OTOF	3.20843e-111	3.78192	417.878	1.10747e-108
CCL8	1.31897e-107	3.7126	396.802	3.46009e-105
ISG15	1.93569e-134	2.83606	379.219	2.38029e-131
SEPTIN4	1.02922e-133	2.69554	358.473	1.19117e-130
NEXN	8.39943e-147	2.40236	350.926	2.36084e-143
ANKRD22	1.27308e-117	2.94086	343.772	6.26195e-115
IRF7	1.26678e-129	2.63056	339.072	9.96957e-127
IFI27	3.73564e-85	3.97988	336.012	3.60288e-83
RTP4	1.21704e-145	2.31538	335.533	2.66059e-142
TIMM10	2.24821e-131	2.53992	331.835	2.10636e-128
LAMP3	1.93834e-113	2.91732	328.819	7.62735e-111
IFI35	9.95533e-158	2.06841	324.744	6.06971e-154
SOCS1	1.01223e-118	2.72123	321.091	5.53209e-116
LGALS3BP	2.0871e-133	2.36291	313.511	2.28132e-130
FBXO6	1.27915e-156	2.00567	312.671	5.03344e-153
H2AC20	2.21855e-135	2.31833	312.172	2.90999e-132
H2AC18	2.42389e-128	2.37151	302.641	1.7663e-125
ZBP1	2.66436e-147	2.05639	301.414	8.73688e-144
MT2A	3.82866e-124	2.35464	290.602	2.59755e-121
OASL	3.94827e-110	2.63906	288.722	1.27348e-107
GALM	4.39457e-119	2.35845	279.139	2.47037e-116
DHX58	2.39681e-120	2.30633	275.884	1.42901e-117
H2BC21	1.31803e-137	1.97944	270.946	2.16101e-134
IFIT3	7.11087e-110	2.47522	270.166	2.22074e-107
SCO2	1.03333e-130	2.07479	269.693	8.83948e-128
RSAD2	7.90318e-101	2.66572	266.844	1.48091e-98
IFI44L	9.01944e-105	2.55051	265.367	2.08774e-102
P2RY6	1.10443e-130	2.00028	259.95	9.05406e-128
CD38	9.32585e-108	2.42297	259.331	2.47954e-105
DUSP5	2.73944e-128	2.02035	257.721	1.92495e-125
SAMD4A	8.03019e-103	2.50451	255.698	1.71733e-100
ATF3	9.98766e-92	2.78123	253.094	1.35522e-89
CEACAM1	4.30317e-107	2.35138	250.107	1.09954e-104
IDO1	5.11571e-86	2.92572	249.538	5.21511e-84
C1QC	9.70223e-109	2.2824	246.529	2.84913e-106
MT1IP	8.88782e-73	3.40438	245.29	4.84398e-71
IL1RN	3.53331e-114	2.16204	245.287	1.47911e-111
OAS3	1.32135e-105	2.33847	245.256	3.2497e-103
C2	1.87825e-115	2.13164	244.555	8.0336e-113
H2BC5	1.56706e-118	2.07023	243.883	8.33294e-116
TGM1	2.16942e-106	2.29135	242.113	5.40296e-104
SIGLEC1	5.27554e-111	2.13098	234.999	1.78959e-108
H4C8	5.48244e-116	2.0004	230.568	2.6309e-113
BATF2	5.26413e-102	2.26053	228.943	1.05686e-99
HES4	8.40441e-87	2.64955	228.061	8.98678e-85
HESX1	1.2906e-83	2.69881	223.702	1.18104e-81
CTSL	3.22205e-100	2.23104	221.971	5.92465e-98
VAMP5	4.04083e-131	1.70211	221.945	3.61379e-128
GBP4	1.74283e-113	1.92372	216.916	6.99802e-111
RGL1	1.15029e-108	2.00834	216.779	3.32824e-106
CASP5	3.84526e-86	2.51807	215.081	3.94266e-84
BST2	4.8713e-132	1.61443	211.994	4.79214e-129
MDK	5.11723e-90	2.36671	211.326	6.53776e-88
NCOA7	3.94345e-108	1.9416	208.536	1.09278e-105
TNFSF10	5.66853e-116	1.80522	208.045	2.65544e-113
PLAC8	7.30012e-123	1.68841	206.217	4.78766e-120
AIM2	3.168e-108	1.88286	202.406	8.90434e-106
SAMD9L	1.12101e-106	1.88946	200.189	2.82767e-104
ABCA1	1.42282e-101	1.96081	197.742	2.77167e-99
GAS6	6.88656e-112	1.75242	194.802	2.46351e-109
IFIT1	9.81322e-88	2.21991	193.15	1.09082e-85
IL27	1.54594e-96	1.99772	191.403	2.49315e-94
LAP3	2.58627e-108	1.75731	189.065	7.37463e-106
OAS2	1.70266e-111	1.69653	187.923	5.98213e-109
IL4I1	4.66423e-101	1.85508	186.122	8.82391e-99
IFI6	3.29385e-87	2.08591	180.394	3.5608e-85
TMEM140	1.69158e-104	1.71792	178.271	3.86997e-102
JUP	2.66696e-103	1.72293	176.728	5.83028e-101
DEFB1	2.63949e-73	2.43324	176.601	1.47534e-71
HERC6	2.77668e-92	1.92507	176.253	3.82036e-90
NT5C3A	6.13564e-95	1.86515	175.72	9.28606e-93
PLSCR1	1.72309e-83	2.12072	175.518	1.56953e-81
WARS1	5.68815e-105	1.66337	173.398	1.34837e-102
MOV10	3.16479e-88	1.98051	173.294	3.66277e-86
C3AR1	1.60466e-101	1.71519	172.882	3.09281e-99
IFI30	2.50898e-113	1.53123	172.418	9.67927e-111
GPR84	4.09137e-100	1.7186	170.809	7.45349e-98
HERC5	5.01672e-84	2.05013	170.775	4.67792e-82
MT1G	1.40092e-100	1.70185	169.936	2.6003e-98
LILRB4	2.69649e-98	1.73985	169.756	4.57357e-96
PARP10	9.68698e-116	1.42803	164.243	4.23536e-113
SP140	1.20414e-122	1.3429	163.725	7.64241e-120
H2AC21	2.12265e-78	2.0744	161.125	1.54107e-76
H2AJ	1.26697e-132	1.20834	159.376	1.31198e-129
C1QA	3.40103e-84	1.90615	159.104	3.18644e-82
MX1	1.101e-113	1.40273	158.45	4.51293e-111
CDKN1A	5.31625e-99	1.60757	157.983	9.17519e-97
CARD16	2.27322e-99	1.59611	157.446	3.99336e-97
TNFSF13B	2.0208e-105	1.48747	155.73	4.90856e-103
LHFPL2	6.596e-94	1.61546	150.529	9.68481e-92
GBP1	2.51521e-77	1.94392	148.904	1.71829e-75
TAP1	8.84243e-113	1.32091	148.013	3.22175e-110
RIN2	5.33696e-79	1.89002	147.937	3.97745e-77
MYOF	4.11324e-89	1.6672	147.357	5.058e-87
KIAA0319L	6.58053e-96	1.5095	143.677	1.02755e-93
ISG20	2.09762e-128	1.12504	143.643	1.58733e-125
SDSL	1.81815e-83	1.71876	142.211	1.64848e-81
MT1A	6.29393e-88	1.62868	142.023	7.15799e-86
SP110	5.94958e-116	1.21525	140.028	2.72228e-113
BLVRA	3.33178e-109	1.28297	139.173	1.0085e-106
SAMD9	9.46108e-96	1.46245	138.968	1.45427e-93
IFI44	3.77783e-73	1.90051	137.64	2.09377e-71
IFIT2	6.29505e-80	1.72901	136.939	4.93447e-78
KIAA1958	2.76496e-78	1.76284	136.723	1.9782e-76
USP18	4.34278e-47	2.92477	135.599	7.5215e-46
H2BC6	1.89191e-84	1.61009	134.802	1.78102e-82
SLC3A2	1.46628e-99	1.35305	133.727	2.62264e-97
OAS1	3.15921e-88	1.52576	133.504	3.66277e-86
XAF1	9.7953e-88	1.53246	133.338	1.09082e-85
PARP12	1.411e-88	1.47213	129.327	1.68251e-86
TLR7	1.09133e-88	1.46635	128.983	1.30927e-86
ATF5	3.94958e-90	1.43792	128.555	5.07896e-88
IFITM3	8.62103e-95	1.36567	128.461	1.2948e-92
PARP9	4.91157e-91	1.39904	126.346	6.44235e-89
H4C14	9.88274e-87	1.46629	126.109	1.04539e-84
HELZ2	1.60102e-102	1.22848	125.054	3.3158e-100
ACTA2	1.26262e-80	1.53274	122.464	1.02653e-78
FRMD3	2.50567e-53	2.32181	122.13	5.6993e-52
EIF2AK2	2.62196e-86	1.41929	121.465	2.75866e-84
IFITM1	7.89253e-111	1.09634	120.71	2.63196e-108
RNASE2	2.21281e-74	1.63206	120.209	1.3035e-72
DYNLT1	1.08689e-94	1.27269	119.587	1.62004e-92
CCRL2	1.721e-61	1.95676	118.901	5.8684e-60
EPSTI1	2.64902e-79	1.50304	118.105	2.01234e-77
CCR1	2.24732e-90	1.31382	117.782	2.90895e-88
GRIN3A	7.26957e-73	1.62888	117.505	3.98409e-71
ACP2	7.82093e-97	1.21985	117.236	1.28231e-94
AXL	9.57084e-76	1.56024	117.048	6.03546e-74
H4C5	8.61767e-80	1.47355	116.506	6.70169e-78
STAP1	3.84748e-86	1.36399	116.505	3.94266e-84
SCARB2	4.79926e-110	1.04929	114.708	1.52299e-107
GADD45B	6.45563e-105	1.09682	114.278	1.51208e-102
UBE2L6	2.20862e-97	1.17747	113.809	3.6826e-95
CMPK2	9.4487e-55	2.10481	113.712	2.30363e-53
SLC6A12	4.13351e-79	1.43536	112.509	3.09227e-77
ZNF438	4.69105e-88	1.28427	112.153	5.36606e-86
CALHM6	1.7088e-51	2.2013	111.754	3.59964e-50
TENT5A	1.07658e-87	1.27636	111.002	1.18999e-85
MTHFD2	2.06843e-87	1.27614	110.621	2.26091e-85
GRN	7.7971e-102	1.08946	110.153	1.53408e-99
MX2	5.26211e-86	1.28733	109.782	5.3367e-84
TMEM51	3.50264e-83	1.32674	109.397	3.1183e-81
H3C4	2.45827e-85	1.28791	108.969	2.41832e-83
DDX58	1.02855e-69	1.56797	108.171	4.94787e-68
NDC80	3.71814e-78	1.39391	107.93	2.64095e-76
GCH1	1.46002e-85	1.27175	107.889	1.45816e-83
STAT1	8.63225e-103	1.0239	104.503	1.82623e-100
MAFB	3.66992e-77	1.36689	104.479	2.48985e-75
TOR1B	2.87856e-85	1.23062	104.038	2.78993e-83
TUFT1	7.0002e-75	1.39516	103.458	4.22482e-73
LY6E	3.61108e-74	1.38689	101.856	2.10825e-72
SP100	1.02889e-85	1.19082	101.205	1.0337e-83
PHACTR2	2.26235e-78	1.29077	100.223	1.63646e-76
C15orf48	4.11925e-60	1.6616	98.6742	1.31782e-58
TDRD7	2.72813e-85	1.16616	98.6156	2.65723e-83
SIL1	1.38476e-71	1.37101	97.1478	7.10688e-70
BAMBI	6.43466e-75	1.3094	97.1464	3.90747e-73
STAT2	5.75903e-91	1.06645	96.2365	7.5039e-89
STOML1	9.6468e-82	1.17387	95.1022	8.07663e-80
LAG3	2.03607e-68	1.40169	94.8823	9.14606e-67
H2BC9	5.71341e-78	1.22173	94.3699	4.0004e-76
TTC21A	1.19178e-57	1.6468	93.7423	3.37871e-56
HP	4.77209e-56	1.68439	93.1827	1.23541e-54
ATOX1	4.77492e-75	1.25327	93.144	2.92668e-73
FAM72D	3.05298e-66	1.39384	91.3176	1.2488e-64
ADM	8.14602e-66	1.38695	90.2754	3.28428e-64
H2BC4	1.71446e-76	1.18947	90.1209	1.11695e-74
CSRNP1	4.07108e-78	1.15863	89.667	2.88124e-76
RMI2	6.6666e-85	1.06266	89.4502	6.36725e-83
PSMA4	1.68629e-85	1.03744	87.9468	1.67564e-83
KCND1	3.03041e-70	1.26046	87.6251	1.47582e-68
RNASE1	4.66339e-50	1.77323	87.4755	9.27726e-49
CLEC5A	6.88412e-69	1.27142	86.6627	3.17946e-67
FDXR	3.04806e-75	1.15849	86.3263	1.88587e-73
SLAMF7	3.53643e-86	1.00626	85.9861	3.66207e-84
GNG5	8.59245e-83	1.0283	84.3882	7.41476e-81
RAB20	4.1546e-73	1.16546	84.3576	2.29612e-71
IFIT5	4.93311e-64	1.3284	84.0969	1.86294e-62
TMEM268	1.98843e-73	1.15652	84.0809	1.12745e-71
UBQLNL	8.61198e-58	1.46608	83.6618	2.46638e-56
DNAJC1	7.04122e-77	1.09533	83.4121	4.68027e-75
LILRA5	5.88669e-67	1.25187	82.9118	2.49077e-65
MS4A4A	6.73988e-72	1.15778	82.4007	3.53619e-70
UNC93B1	7.68021e-80	1.04017	82.2927	5.99636e-78
RBCK1	4.29571e-77	1.06513	81.3405	2.89446e-75
NTNG2	8.15847e-54	1.53196	81.3291	1.90413e-52
IFI16	7.83603e-67	1.22191	80.7755	3.30137e-65
TRIM5	3.05903e-72	1.12948	80.7739	1.61791e-70
BUB1	6.91991e-29	2.86672	80.7264	4.48154e-28
ZNF366	5.2295e-64	1.26494	80.0472	1.96731e-62
SMCO4	2.44698e-80	1.00531	80.0343	1.95709e-78
TRIM38	4.463e-74	1.07429	78.7993	2.59791e-72
GPBAR1	3.66866e-66	1.20145	78.6174	1.49753e-64
ASPHD2	2.45376e-76	1.02817	77.7399	1.57256e-74
APOBEC3H	3.7097e-51	1.54073	77.7003	7.73182e-50
GLRX	6.42632e-75	1.04269	77.3596	3.90747e-73
IGHG4	2.3077e-20	3.89117	76.4101	8.72817e-20
SIGLEC5	1.85258e-63	1.21548	76.2497	6.813e-62
ASPRV1	3.4815e-34	2.2605	75.6322	3.0897e-33
CTSD	3.27367e-69	1.09349	74.8877	1.52268e-67
MT1E	1.48512e-51	1.47192	74.815	3.13516e-50
CLEC1B	4.81115e-53	1.4214	74.3645	1.07936e-51
ETV7	9.15071e-50	1.51623	74.3535	1.8022e-48
CGAS	5.13097e-71	1.05689	74.2886	2.58189e-69
TRIM21	4.38153e-73	1.01917	73.7453	2.41475e-71
ADAP2	5.28147e-71	1.04862	73.6938	2.65084e-69
APOBEC3F	1.74025e-63	1.16658	73.2136	6.41187e-62
NFIL3	5.22611e-67	1.08994	72.2431	2.22562e-65
CNIH4	1.19995e-66	1.089	71.7875	5.01252e-65
RASGRP3	1.49559e-61	1.17316	71.3578	5.13536e-60
NAPA	1.26213e-66	1.07389	70.7682	5.26112e-65
SAT1	1.38348e-66	1.06635	70.2286	5.75477e-65
FFAR2	1.96808e-57	1.22848	69.6619	5.50812e-56
SCIMP	1.29219e-55	1.26322	69.3362	3.28473e-54
IGLC2	3.73663e-22	3.22954	69.201	1.58718e-21
VRK2	1.70421e-69	1.00591	69.175	8.0796e-68
PARP14	1.50861e-53	1.30804	69.0924	3.46346e-52
SLCO4A1	6.31954e-67	1.04182	68.968	2.66818e-65
EPHB2	4.1193e-59	1.17789	68.7716	1.26242e-57
DDX60	4.27685e-46	1.50116	68.1061	7.10702e-45
PKD2L1	4.83226e-50	1.37681	67.8988	9.59381e-49
HSPA1B	1.8943e-56	1.21525	67.717	4.99603e-55
ABTB2	1.72323e-58	1.17229	67.716	5.1061e-57
OSM	1.59825e-58	1.17052	67.6519	4.75727e-57
UBE2S	2.59901e-36	1.8867	67.1384	2.6183e-35
SIGLEC16	2.02504e-45	1.50214	67.136	3.22352e-44
IGLC3	4.38213e-22	3.13272	66.9096	1.85336e-21
LGALS9	6.4345e-55	1.21296	65.7321	1.58447e-53
DRAP1	6.82834e-64	1.03943	65.6561	2.53965e-62
H2BC8	5.67006e-63	1.05072	65.4035	2.0432e-61
CMC2	1.63647e-64	1.01306	64.6193	6.32566e-63
MCEMP1	2.74847e-47	1.38782	64.6182	4.8025e-46
IGLJ3	6.64053e-19	3.49052	63.4499	2.2734e-18
FZD2	3.94474e-52	1.2305	63.2526	8.51952e-51
GBP3	5.66027e-54	1.18005	62.8343	1.33213e-52
RUFY4	2.6659e-61	1.03294	62.5696	8.99685e-60
ANXA3	9.54712e-50	1.26614	62.0662	1.87652e-48
H1	3.90531e-60	1.044	62.0222	1.25142e-58
TRIM6	1.47908e-56	1.10966	61.9523	3.93255e-55
APOL2	5.68776e-62	1.01109	61.9242	1.98065e-60
IGKC	3.6888e-22	2.88418	61.817	1.56788e-21
ERICH3	4.0088e-44	1.41459	61.3888	6.00252e-43
GM2A	8.96253e-61	1.01288	60.8209	2.96865e-59
SDC3	3.20115e-54	1.13341	60.6317	7.58827e-53
ABCD1	8.7646e-53	1.14952	59.8409	1.93322e-51
SLC26A8	2.25321e-48	1.23349	58.7722	4.15093e-47
MASTL	2.72998e-58	1.0206	58.7494	7.9929e-57
AURKB	4.5267e-26	2.31773	58.741	2.46848e-25
GNGT2	1.06933e-57	1.02136	58.1878	3.04915e-56
ACOT9	1.68146e-54	1.05811	56.8993	4.02957e-53
SESTD1	5.43564e-55	1.04813	56.8766	1.34186e-53
NT5C3AP1	5.01531e-31	1.87552	56.8276	3.71606e-30
BCL2A1	1.98408e-48	1.17372	55.9893	3.66542e-47
ELL2	5.42101e-27	2.12356	55.7774	3.14812e-26
IRF4	5.7737e-47	1.20576	55.7525	9.92986e-46
PALM2AKAP2	3.491e-54	1.03724	55.4476	8.24556e-53
BAK1	4.85996e-43	1.30814	55.3517	6.91394e-42
JAK2	1.19077e-48	1.14928	55.0784	2.23128e-47
SIGLEC11	3.92311e-29	1.90386	54.0818	2.58151e-28
ZNF684	1.31945e-47	1.14876	53.8536	2.34298e-46
ANKRD33	4.69954e-54	1.00668	53.6844	1.10735e-52
DDIT3	5.23149e-53	1.00326	52.4519	1.16833e-51
TIFA	1.97572e-49	1.07253	52.2366	3.82978e-48
TNNT1	8.12344e-36	1.48094	51.9665	7.95564e-35
CHMP5	4.84319e-45	1.15722	51.2823	7.53278e-44
H4C15	7.13337e-30	1.73682	50.6224	4.91418e-29
PTTG1	1.66535e-24	2.1194	50.3962	8.2264e-24
HSH2D	2.39483e-47	1.07176	49.9662	4.18829e-46
FAR2	1.13708e-46	1.05311	48.3841	1.94201e-45
SLC49A3	2.10164e-48	1.01417	48.3529	3.87896e-47
SPC24	9.04121e-41	1.20285	48.1668	1.14839e-39
NAT8B	4.40884e-42	1.14552	47.3739	5.9741e-41
SLC22A4	8.78385e-41	1.17938	47.2414	1.11714e-39
CYTOR	1.36534e-44	1.07391	47.1068	2.09868e-43
IFI27L2	2.6218e-43	1.10083	46.8747	3.78181e-42
XRN1	4.79277e-43	1.09678	46.4153	6.82822e-42
TRIP6	1.67832e-38	1.2142	45.8665	1.90652e-37
PML	1.08284e-37	1.21284	44.8331	1.17318e-36
CYSTM1	2.81372e-39	1.16246	44.8137	3.35922e-38
CDCA5	7.31428e-32	1.41966	44.2023	5.70386e-31
H2AC8	7.71811e-41	1.05651	42.3793	9.87989e-40
NCAPG	8.43144e-34	1.27598	42.2019	7.324e-33
GBA	6.78773e-34	1.27061	42.1441	5.91708e-33
ARHGAP23	8.18068e-23	1.90546	42.0863	3.61859e-22
LINC02555	3.90099e-17	2.54399	41.744	1.19291e-16
CACNA1A	1.48322e-41	1.02054	41.6673	1.96779e-40
GBP6	1.87174e-39	1.06562	41.2692	2.24826e-38
STAB1	2.00295e-32	1.27927	40.5508	1.6184e-31
SEC24D	1.42356e-36	1.12813	40.4398	1.45651e-35
CD300C	3.63715e-38	1.07169	40.1234	4.04528e-37
IGHM	1.01391e-18	2.20778	39.7267	3.42878e-18
PPIB	3.04055e-38	1.04781	39.3106	3.39132e-37
ESPL1	3.22065e-22	1.81613	39.0324	1.37454e-21
TYMP	8.47702e-36	1.04758	36.7403	8.28541e-35
CENPW	9.72787e-34	1.10283	36.4067	8.42411e-33
IGLL5	4.545e-14	2.72808	36.3993	1.14031e-13
DTL	1.30599e-33	1.08078	35.5403	1.12305e-32
EMP1	1.37663e-32	1.10975	35.3579	1.12293e-31
SRGAP2	1.26598e-31	1.14424	35.3543	9.72213e-31
CEACAM3	7.58546e-35	1.03376	35.272	7.01005e-34
TCN1	2.46328e-21	1.7085	35.2095	9.89892e-21
TROAP	1.51377e-20	1.73472	34.382	5.80008e-20
KIF18B	2.53709e-22	1.58733	34.2794	1.08871e-21
CXCR2P1	4.59164e-14	2.5636	34.1934	1.15142e-13
GBP1P1	1.53568e-11	3.10442	33.5703	3.26185e-11
H1-0	3.00576e-21	1.60914	33.0229	1.20224e-20
CCNA2	1.31893e-30	1.10317	32.9625	9.54746e-30
CKS2	1.21878e-26	1.26946	32.897	6.90455e-26
LMNB1	2.44617e-26	1.27507	32.6565	1.35956e-25
MYL6B	3.55032e-22	1.51977	32.5987	1.51098e-21
PDIA6	1.47131e-29	1.10609	31.891	9.91708e-29
TFEC	7.44263e-29	1.12885	31.7526	4.80899e-28
IL18R1	1.98253e-30	1.06147	31.5285	1.42203e-29
TRPV4	5.47844e-32	1.00704	31.4813	4.30981e-31
RUBCN	3.01176e-23	1.37561	30.9804	1.36946e-22
CHROMR	2.62769e-20	1.58077	30.9521	9.90417e-20
CDT1	1.76283e-30	1.03584	30.8201	1.26676e-29
MARCO	6.29742e-31	1.01262	30.5821	4.64052e-30
GMNN	2.18289e-28	1.10543	30.5772	1.37699e-27
CCNA1	1.62125e-26	1.11059	28.6422	9.11372e-26
KIAA0895L	1.01357e-23	1.23031	28.2898	4.76284e-23
SEC24A	2.73363e-27	1.06267	28.2279	1.61708e-26
IFIH1	3.27851e-22	1.28705	27.6514	1.39863e-21
PDIA5	9.55562e-18	1.62038	27.5784	3.03776e-17
H2BC18	4.25312e-16	1.75571	26.9875	1.2177e-15
ADGRL4	1.55963e-19	1.40871	26.4935	5.58227e-19
H1-2	5.72275e-18	1.51525	26.1266	1.84946e-17
LY96	7.32152e-23	1.14056	25.2468	3.24658e-22
DDX60L	1.15202e-15	1.68174	25.1227	3.20957e-15
GRAMD1B	3.14253e-15	1.71998	24.9444	8.51759e-15
DYNC2I2	3.07285e-18	1.38367	24.2315	1.00983e-17
IGHA1	6.94446e-14	1.78576	23.4977	1.72168e-13
IGHV4	1.66725e-14	1.69918	23.4113	4.29326e-14
CFB	2.51971e-18	1.31154	23.0814	8.33059e-18
EXOC3L1	1.13971e-20	1.1232	22.4003	4.40979e-20
PRDX4	2.23466e-13	1.7526	22.1718	5.35267e-13
LINC01093	1.18307e-08	2.78864	22.1056	2.09418e-08
FLVCR2	4.52245e-17	1.29761	21.2089	1.37653e-16
NAIPP3	1.00518e-10	2.10753	21.0706	2.02694e-10
IGKV1	9.94378e-14	1.59343	20.7184	2.43884e-13
FAM225A	4.83355e-13	1.66774	20.5394	1.13214e-12
MRPL12	4.97812e-18	1.18141	20.4418	1.61518e-17
FABP5	1.03044e-10	1.99002	19.8743	2.0766e-10
NAIPP1	8.72522e-12	1.7906	19.8026	1.88337e-11
ANKRD36BP2	2.0739e-11	1.81998	19.4432	4.3636e-11
IGKV1D	9.70227e-16	1.28026	19.2207	2.71888e-15
IGHV3	4.01364e-13	1.51065	18.7267	9.46296e-13
BFSP2	3.90597e-12	1.50382	17.156	8.61064e-12
ANO7L1	1.69401e-10	1.75465	17.1449	3.36798e-10
IGHV1	3.46233e-09	1.97452	16.7057	6.33712e-09
GTSF1	6.83077e-16	1.05497	15.9992	1.93069e-15
LINC01679	5.63176e-11	1.55092	15.8959	1.15398e-10
JPX	1.5339e-12	1.32694	15.6767	3.4717e-12
RPL22L1	7.19613e-13	1.2151	14.7549	1.6655e-12
RETN	2.17724e-12	1.22863	14.3284	4.87952e-12
CCDC194	1.078e-08	1.77988	14.181	1.91353e-08
TMEM150B	1.26788e-11	1.22704	13.371	2.70706e-11
TXNDC5	1.94767e-08	1.69028	13.0329	3.39961e-08
SRGAP2B	6.28946e-09	1.51493	12.4246	1.13102e-08
VSIG10L	1.79805e-10	1.26627	12.3401	3.56692e-10
IGHA2	3.52648e-08	1.5719	11.7148	6.06022e-08
RNY1	8.888e-08	1.65838	11.6935	1.49081e-07
MILR1	1.55729e-10	1.13206	11.1028	3.10275e-10
CCL3L3	2.32852e-10	1.14674	11.0464	4.591e-10
LINC01146	9.16408e-10	1.20753	10.9135	1.74004e-09
ANG	1.72568e-10	1.1055	10.7931	3.4275e-10
SMPD5	1.0234e-06	1.76433	10.5683	1.59856e-06
TBC1D27P	3.70691e-09	1.15512	9.73884	6.76814e-09
CKS1B	8.79428e-09	1.1219	9.03783	1.56799e-08
IGHG3	4.55889e-05	1.99496	8.66041	6.42989e-05
FEN1	4.77547e-07	1.35709	8.57814	7.61466e-07
MIR3945HG	9.66718e-07	1.32243	7.95403	1.51278e-06
KDELR2	6.9541e-07	1.03307	6.36142	1.09827e-06
IGHE	1.08186e-05	1.01428	5.03672	1.58884e-05
LINC02649	2.82775e-05	1.02653	4.66924	4.0436e-05
LINC00278	0.00221549	1.61362	4.28341	0.00280971
RNA5S9	0.000223975	1.1591	4.23048	0.000303137
FAM157B	0.000144221	1.05609	4.05643	0.000197505
APOBEC3B	0.000855382	1.00592	3.086	0.00111366
PI3	1.06667e-136	-4.16628	-566.497	1.61436e-133
TXNDC12	2.76071e-142	-1.57954	-223.598	5.43171e-139
NELL2	8.43071e-113	-1.82169	-204.165	3.1297e-110
CAMK1D	6.70499e-116	-1.49391	-172.059	2.9982e-113
DPEP3	1.16751e-99	-1.63561	-161.815	2.10741e-97
VENTX	1.41736e-109	-1.44559	-157.35	4.35726e-107
KLRB1	1.5703e-99	-1.57668	-155.783	2.78338e-97
STRADB	1.20561e-72	-2.13039	-153.215	6.5526e-71
RPS23	9.13032e-99	-1.49668	-146.734	1.56208e-96
KLHL3	6.23671e-109	-1.2616	-136.512	1.8592e-106
RTN1	1.92496e-83	-1.60154	-132.472	1.73732e-81
VIPR1	3.98128e-113	-1.17107	-131.628	1.50638e-110
EEF1G	3.22889e-89	-1.4561	-128.852	4.02078e-87
EIF3L	5.43142e-118	-1.05657	-123.899	2.74008e-115
CCN3	7.20469e-88	-1.42059	-123.794	8.14669e-86
CRIP2	6.47106e-104	-1.19798	-123.619	1.4468e-101
RNF144A	1.56628e-107	-1.13817	-121.563	4.05482e-105
ERP27	4.13639e-108	-1.11767	-120.02	1.13033e-105
RPL22	3.3115e-102	-1.17754	-119.496	6.78685e-100
CYBRD1	2.29063e-88	-1.36121	-119.296	2.71495e-86
CYP27A1	1.51283e-76	-1.54951	-117.484	9.88868e-75
SELENBP1	1.69017e-52	-2.23968	-115.953	3.69902e-51
MXD4	7.80885e-108	-1.07601	-115.249	2.10464e-105
HAGH	1.77077e-77	-1.46982	-112.811	1.22675e-75
PID1	2.296e-83	-1.3571	-112.149	2.06273e-81
ALPL	9.45161e-57	-1.97959	-110.905	2.53698e-55
MME	5.2794e-70	-1.60086	-110.903	2.56475e-68
CBX7	8.1407e-104	-1.05855	-109.125	1.79964e-101
NOP53	9.95219e-103	-1.03313	-105.381	2.08308e-100
RPL4	1.09972e-96	-1.08991	-104.586	1.78818e-94
FBXO7	4.8131e-75	-1.3858	-102.99	2.94092e-73
PRSS33	1.12763e-52	-1.98037	-102.876	2.47889e-51
PPM1F	2.75644e-92	-1.08462	-99.3074	3.81922e-90
CD8B2	3.29074e-63	-1.54092	-96.281	1.19899e-61
IL11RA	3.50715e-91	-1.0632	-96.1717	4.66237e-89
SPNS3	1.55898e-87	-1.0939	-94.9586	1.71357e-85
DCAF12	2.50832e-61	-1.56583	-94.8901	8.47959e-60
RPS6KA5	4.54467e-88	-1.08158	-94.4679	5.22902e-86
RFLNB	6.88636e-75	-1.25097	-92.7744	4.1689e-73
CA4	9.21757e-64	-1.45785	-91.8958	3.41536e-62
MICAL2	2.33765e-76	-1.21008	-91.5196	1.51293e-74
ARAP3	6.78709e-77	-1.18585	-90.3244	4.52665e-75
RPGRIP1	3.30564e-81	-1.12096	-90.2161	2.73271e-79
CLC	1.03947e-43	-2.096	-90.0928	1.52623e-42
RBL2	4.10916e-89	-1.01667	-89.8597	5.058e-87
PIK3IP1	2.25146e-70	-1.28508	-89.5029	1.10467e-68
FAM102A	2.47408e-87	-1.02436	-88.7167	2.68936e-85
DENND11	2.21591e-73	-1.21958	-88.6083	1.24566e-71
FCGBP	2.05864e-61	-1.45809	-88.4862	7.00755e-60
TBL1X	3.01965e-86	-1.02678	-87.8102	3.14347e-84
DYRK2	3.65953e-83	-1.05585	-87.0411	3.2433e-81
EPHA1	2.52658e-78	-1.11952	-86.8718	1.8209e-76
PITHD1	1.67466e-71	-1.22001	-86.3478	8.55818e-70
ASCC2	1.54901e-75	-1.14217	-85.4458	9.67516e-74
SNCA	4.07515e-52	-1.65135	-84.8629	8.79151e-51
ZNF395	3.49958e-83	-1.02682	-84.6677	3.1183e-81
TMEM204	4.8039e-81	-1.05295	-84.5711	3.9382e-79
PTGDR2	7.87464e-65	-1.26433	-81.048	3.09248e-63
STMN3	3.70991e-59	-1.37384	-80.2745	1.13873e-57
RPL13A	2.59086e-78	-1.03029	-79.937	1.86041e-76
SLC25A39	5.72025e-63	-1.27384	-79.2873	2.05751e-61
GZMK	1.47458e-76	-1.04272	-79.0709	9.67077e-75
ABLIM1	6.28296e-76	-1.04988	-78.9531	4.00056e-74
SNHG29	3.52412e-69	-1.13575	-77.7457	1.63531e-67
EPB42	3.39758e-41	-1.91157	-77.359	4.42112e-40
DPEP2	2.11901e-70	-1.10945	-77.2999	1.0449e-68
PLCH2	8.39347e-57	-1.3762	-77.1717	2.26843e-55
TSPAN5	9.65801e-56	-1.39877	-76.9536	2.47102e-54
CD96	1.24875e-74	-1.03094	-76.1902	7.40034e-73
LEF1	1.64819e-61	-1.23867	-75.2898	5.62988e-60
SGK1	2.80042e-68	-1.10729	-74.8007	1.25509e-66
BEX2	3.5099e-64	-1.16972	-74.2239	1.33315e-62
SLC4A1	1.89256e-46	-1.60316	-73.3013	3.19075e-45
GOLGA8B	2.15798e-45	-1.63601	-73.0738	3.42682e-44
CNTNAP2	2.21619e-57	-1.28583	-72.8477	6.1937e-56
PHOSPHO1	2.71613e-52	-1.40581	-72.4922	5.89843e-51
SPOCK2	3.46424e-65	-1.09462	-70.5597	1.36865e-63
PCMTD2	1.2155e-69	-1.01641	-70.0462	5.80461e-68
SESN3	1.49215e-54	-1.29595	-69.7561	3.59339e-53
UBXN6	9.42594e-55	-1.28665	-69.5123	2.30094e-53
TESC	8.13962e-58	-1.21066	-69.116	2.33791e-56
SIGLEC17P	2.10181e-49	-1.41424	-68.8413	4.06618e-48
GYPC	2.37554e-51	-1.33016	-67.3383	4.99345e-50
MAL	4.25681e-65	-1.0257	-66.0254	1.67841e-63
MKRN1	1.89985e-66	-1.00367	-65.9627	7.85284e-65
RGCC	1.1849e-65	-1.00878	-65.4961	4.72877e-64
FCER1A	1.55861e-36	-1.81363	-64.9412	1.58889e-35
PTGDR	2.60214e-60	-1.06761	-63.613	8.42057e-59
RNF10	2.65964e-49	-1.30649	-63.4632	5.1102e-48
TBC1D4	3.3218e-54	-1.17599	-62.8906	7.8648e-53
AXIN2	2.44155e-63	-1.00302	-62.8015	8.91233e-62
PLEKHA1	7.24089e-62	-1.01956	-62.3364	2.5126e-60
NINJ2	1.29907e-59	-1.04825	-61.7274	4.06995e-58
ARRDC5	2.03328e-47	-1.2939	-60.4143	3.56232e-46
HOPX	5.61093e-56	-1.08931	-60.1856	1.44119e-54
CDC34	8.37388e-48	-1.27708	-60.1213	1.50462e-46
PNMA3	1.29794e-49	-1.22033	-59.658	2.53594e-48
ALDH5A1	1.38108e-55	-1.08564	-59.5581	3.49713e-54
VWCE	5.98261e-42	-1.40274	-57.8252	8.05115e-41
CD248	5.60711e-56	-1.04293	-57.6234	1.44119e-54
ID3	2.13997e-53	-1.06563	-56.1263	4.88444e-52
OLIG2	1.88323e-49	-1.14561	-55.8198	3.65771e-48
BCL2L1	3.62949e-50	-1.12352	-55.5472	7.24977e-49
ELAPOR1	4.15788e-37	-1.47519	-53.6692	4.36533e-36
GLRX5	2.0496e-50	-1.06363	-52.8499	4.14023e-49
SLC6A8	6.46154e-40	-1.28158	-50.2245	7.91106e-39
MIR646HG	4.72722e-46	-1.10144	-49.9232	7.82896e-45
FAM210B	5.18379e-41	-1.19654	-48.203	6.67918e-40
YBX3	5.71089e-47	-1.03368	-47.8005	9.83042e-46
RAP1GAP	1.97297e-33	-1.45037	-47.4341	1.6819e-32
DMTN	4.45146e-38	-1.26786	-47.3563	4.9176e-37
KLC3	1.85836e-37	-1.28612	-47.2402	1.98133e-36
TMOD1	6.13318e-44	-1.03362	-44.6651	9.10719e-43
CNTNAP3B	5.13772e-23	-2.00371	-44.6611	2.30314e-22
DGAT2	1.95572e-44	-1.02174	-44.6588	2.98286e-43
FECH	4.75648e-44	-1.02841	-44.5535	7.10044e-43
SIGLEC10	4.79997e-43	-1.05123	-44.4868	6.83353e-42
OSBP2	2.72136e-31	-1.42881	-43.672	2.0546e-30
GAL3ST4	2.51068e-42	-1.02541	-42.6572	3.44235e-41
TNS1	2.93844e-34	-1.25984	-42.2448	2.62313e-33
KRT1	3.22762e-30	-1.35146	-39.8562	2.27611e-29
ALAS2	1.56571e-32	-1.232	-39.1843	1.27348e-31
MYL4	6.96267e-36	-1.11239	-39.1085	6.86325e-35
PABPC3	6.21096e-37	-1.05918	-38.3497	6.47592e-36
CMTM2	1.70025e-36	-1.06903	-38.2386	1.72792e-35
RUNDC3A	2.87224e-34	-1.10827	-37.1732	2.5652e-33
RPL15	6.68311e-37	-1.00508	-36.3588	6.95715e-36
KRT72	1.68327e-32	-1.13051	-35.9206	1.36514e-31
S1PR1	7.00333e-36	-1.01318	-35.6181	6.89988e-35
OLIG1	1.1713e-31	-1.07212	-33.1622	9.02324e-31
HBG2	4.67962e-25	-1.35831	-33.0473	2.39396e-24
MEGF6	2.17185e-25	-1.33006	-32.8035	1.13315e-24
CARNS1	6.47698e-22	-1.49832	-31.7473	2.70838e-21
HBG1	1.51399e-24	-1.32347	-31.5249	7.49753e-24
CCNJL	1.16763e-28	-1.05299	-29.413	7.4661e-28
KLRK1	1.31358e-19	-1.50418	-28.4013	4.72653e-19
GPR146	5.00622e-28	-1.02417	-27.9602	3.08769e-27
LINC02158	6.47148e-20	-1.44194	-27.6694	2.37726e-19
MS4A1	9.48378e-25	-1.04149	-25.0197	4.75298e-24
GUK1	6.61559e-24	-1.00695	-23.3405	3.14704e-23
OR2W3	3.60127e-21	-1.07837	-22.0456	1.43112e-20
LINC00926	3.769e-18	-1.25159	-21.8074	1.23284e-17
PRAG1	5.65616e-18	-1.18244	-20.3942	1.82854e-17
HBD	1.00845e-19	-1.0175	-19.3288	3.65871e-19
SLPI	6.01175e-16	-1.14027	-17.356	1.70483e-15
LINC01215	9.5321e-15	-1.22815	-17.2197	2.49129e-14
TRABD2A	1.79289e-15	-1.12354	-16.5682	4.94189e-15
UICLM	1.84639e-15	-1.12117	-16.519	5.08364e-15
LINC02035	1.48818e-15	-1.0951	-16.2374	4.11986e-15
MDS2	1.57757e-12	-1.2592	-14.8611	3.56684e-12
SERPINA13P	8.41167e-09	-1.34007	-10.8212	1.50127e-08
LUNAR1	6.61425e-09	-1.31881	-10.7872	1.18704e-08
FAM153B	7.7447e-07	-1.33205	-8.14013	1.21882e-06
TRBV18	1.16452e-06	-1.15161	-6.8335	1.81251e-06
LINC00402	3.77744e-06	-1.2069	-6.5448	5.70954e-06
HBZ	2.12295e-06	-1.09581	-6.2166	3.2543e-06
DDX11L10	1.33311e-06	-1.04628	-6.14703	2.06723e-06
TRBV2	0.000136558	-1.11518	-4.30981	0.000187337

## Sheet: FLU
Symbol	metap	metafc	idx	metapFDRadj
IFI27	1.52952e-31	5.66138	174.458	2.75711e-27
IFI44L	7.89703e-24	2.98629	68.9909	1.42352e-20
OTOF	2.7998e-16	4.08991	63.6099	5.25721e-14
OASL	1.00467e-23	2.46493	56.6885	1.64638e-20
IFI6	7.33102e-20	2.93211	56.1054	3.57159e-17
IFI44	3.28417e-24	2.29138	53.8098	7.40006e-21
RSAD2	2.34741e-19	2.87397	53.5403	9.84056e-17
IFITM3	4.05106e-25	2.13797	52.1502	1.21707e-21
XAF1	1.1332e-26	1.93648	50.2432	5.10674e-23
USP41	6.51292e-14	3.77473	49.7745	6.31193e-12
OAS3	6.18536e-21	2.44723	49.4551	3.84473e-18
ISG15	5.49918e-21	2.42932	49.2172	3.67141e-18
IFIT3	9.50928e-20	2.40463	45.7405	4.39524e-17
EPSTI1	1.16563e-27	1.67542	45.125	7.00391e-24
KLHDC7B	7.71771e-24	1.93183	44.6494	1.42352e-20
HERC6	7.94588e-26	1.74032	43.6818	2.86465e-22
HESX1	7.13817e-13	3.47665	42.2288	5.25195e-11
SPATS2L	3.56105e-21	1.95143	39.9038	2.46891e-18
MX1	1.65175e-22	1.82954	39.8511	1.63804e-19
CMPK2	3.30393e-20	2.02725	39.4927	1.75167e-17
SIGLEC1	6.4481e-22	1.83036	38.7865	5.28334e-19
IFIT1	1.04405e-16	2.41455	38.5876	2.16323e-14
SERPING1	9.90885e-21	1.86196	37.2465	5.76183e-18
RNASE2	1.37742e-18	2.06143	36.8191	4.43381e-16
SCO2	2.95604e-24	1.55708	36.6369	7.40006e-21
PLSCR1	6.5974e-23	1.63628	36.2937	7.92832e-20
EIF2AK2	9.74724e-23	1.633	35.9443	1.03355e-19
FCGR1A	4.55105e-17	2.18432	35.696	1.0128e-14
IRF7	7.07426e-23	1.60027	35.4464	7.97004e-20
OAS1	1.7509e-19	1.85647	34.8213	7.51469e-17
AIM2	4.02289e-18	1.94416	33.8195	1.15106e-15
HERC5	2.80386e-17	2.02256	33.478	6.73898e-15
TCN2	4.20664e-23	1.48607	33.2524	6.03095e-20
MS4A4A	1.72655e-22	1.52709	33.2338	1.63804e-19
IFI35	6.23978e-23	1.47246	32.6956	7.92832e-20
DDX60	1.35874e-19	1.631	30.7719	5.97381e-17
MT2A	3.98291e-19	1.64047	30.1844	1.52757e-16
LY6E	8.21215e-19	1.65402	29.9138	2.84678e-16
SAMD9L	3.18606e-19	1.60597	29.7051	1.27626e-16
OAS2	5.77349e-21	1.45005	29.3469	3.71689e-18
SLC26A8	2.45956e-14	2.14769	29.2282	2.68704e-12
PARP9	2.82109e-20	1.49271	29.1818	1.541e-17
LINC00487	4.62292e-13	2.33128	28.7565	3.63899e-11
NEXN	1.51885e-20	1.43046	28.3495	8.55588e-18
IFITM1	1.60928e-28	1.01486	28.2063	1.45045e-24
RUFY4	1.79078e-15	1.91062	28.1758	2.80701e-13
RTP4	3.64568e-18	1.60399	27.9707	1.07733e-15
C1QB	4.36258e-17	1.7024	27.8516	9.82999e-15
DHX58	8.95089e-19	1.5262	27.5451	2.99562e-16
H2BC21	5.23871e-19	1.43116	26.1628	1.9272e-16
IFIH1	2.68096e-13	2.07959	26.144	2.21684e-11
GBP1P1	3.12367e-10	2.73577	26.0044	1.13523e-08
FBXO6	8.01724e-20	1.34291	25.6442	3.80312e-17
LINC01093	2.42263e-10	2.62024	25.1955	9.02279e-09
ZBP1	8.9739e-19	1.3699	24.7226	2.99562e-16
CDKN1A	2.51288e-21	1.19877	24.6944	1.81189e-18
HELZ2	1.77165e-17	1.46958	24.6178	4.43552e-15
CXCR2P1	7.20814e-15	1.73573	24.5471	9.55397e-13
FAP	5.62142e-09	2.96484	24.4604	1.45049e-07
LGALS3BP	2.80014e-22	1.12887	24.3303	2.42584e-19
CTSL	2.41845e-21	1.17805	24.2872	1.81189e-18
MX2	1.94641e-18	1.34604	23.8394	6.04931e-16
H2BC5	2.39744e-21	1.14763	23.6644	1.81189e-18
ADM	2.81269e-15	1.62317	23.6186	4.12207e-13
GPR84	3.92298e-14	1.73003	23.1934	4.08761e-12
IL1RN	1.35664e-15	1.55834	23.1687	2.20314e-13
PDCD1LG2	4.81214e-12	1.99008	22.5231	2.88185e-10
LAP3	1.22023e-17	1.33092	22.5106	3.09802e-15
C3AR1	8.36984e-18	1.31481	22.4533	2.21875e-15
BATF2	1.06986e-14	1.60313	22.3968	1.33926e-12
ANKRD22	1.71142e-14	1.62094	22.3149	2.02961e-12
H4C8	2.61344e-14	1.60366	21.7822	2.82094e-12
MOV10	5.46653e-19	1.1844	21.6299	1.97079e-16
RNF213	7.17115e-16	1.33789	20.2615	1.24295e-13
SEPTIN4	3.54802e-16	1.3027	20.1267	6.59346e-14
APOBEC3A	6.95583e-14	1.50357	19.7835	6.59971e-12
PARP12	9.22849e-19	1.09272	19.707	3.02459e-16
IFI30	5.68532e-17	1.20496	19.5749	1.23474e-14
LDLR	3.79611e-19	1.06202	19.5631	1.48758e-16
CCDC194	2.41101e-11	1.83958	19.5323	1.21061e-09
MAFB	2.30823e-15	1.3185	19.2985	3.44735e-13
IFIT2	9.10478e-13	1.59906	19.2538	6.51281e-11
DDX60L	4.32891e-12	1.68886	19.1916	2.61856e-10
STAT1	3.72636e-16	1.23398	19.0388	6.85422e-14
CCL2	3.24164e-11	1.81147	19.0009	1.5708e-09
STAB1	5.00146e-16	1.24015	18.9755	8.75305e-14
NMRAL2P	1.10095e-09	2.10707	18.8756	3.43947e-08
CARD16	2.55614e-16	1.19498	18.6327	4.90181e-14
LAMP3	2.798e-13	1.45166	18.223	2.30305e-11
LINC02574	8.0125e-11	1.77543	17.9252	3.4471e-09
FCGR1B	5.64092e-14	1.35278	17.9225	5.62633e-12
CCR1	6.75872e-15	1.25651	17.805	9.03275e-13
IFIT5	1.54932e-15	1.15591	17.1189	2.4715e-13
C1QC	5.07144e-17	1.04851	17.0854	1.11485e-14
SAMD9	9.12857e-17	1.064	17.0661	1.91339e-14
TOR1B	5.29835e-15	1.19088	17.0008	7.40373e-13
EXOC3L1	3.52529e-09	1.98809	16.805	9.68703e-08
ALMS1P1	6.16573e-09	1.9958	16.3855	1.55663e-07
TRIM6	3.20258e-12	1.41452	16.2592	2.0256e-10
NAIP	3.92764e-11	1.54872	16.1158	1.83419e-09
HP	6.53809e-09	1.96288	16.0653	1.63009e-07
MCEMP1	4.60375e-09	1.91638	15.9766	1.22762e-07
SQOR	2.24352e-14	1.14902	15.683	2.5435e-12
FFAR2	2.27185e-14	1.14919	15.6791	2.55952e-12
MIR3945HG	8.9645e-11	1.55986	15.6727	3.80221e-09
KCTD14	8.05464e-15	1.10354	15.5533	1.04455e-12
CXCL10	1.55651e-09	1.75208	15.432	4.70765e-08
PARP14	4.59488e-16	1.00345	15.3907	8.23487e-14
KIAA1958	1.16219e-13	1.18366	15.3103	1.032e-11
MASTL	1.92078e-15	1.03826	15.2796	2.95932e-13
TYMP	5.74439e-15	1.07278	15.2772	7.96526e-13
TRIM22	1.05923e-15	1.00854	15.1029	1.76794e-13
FRMD3	1.89644e-15	1.02271	15.0564	2.94701e-13
GRN	1.30601e-15	1.00252	14.9216	2.15948e-13
DTX3L	2.00517e-14	1.08876	14.9136	2.30225e-12
PHLDA2	6.42566e-09	1.81831	14.8958	1.61729e-07
RGL1	2.61089e-13	1.16682	14.6824	2.16885e-11
HES4	1.18754e-12	1.22916	14.6582	8.17048e-11
CSRNP1	3.80257e-15	1.00859	14.5439	5.39726e-13
MYOF	6.76479e-15	1.02214	14.4835	9.03275e-13
HK3	4.88364e-12	1.27662	14.4402	2.90536e-10
SMTNL1	1.00482e-07	2.03558	14.2448	1.70449e-06
UNC93B1	1.03333e-12	1.18054	14.1497	7.19185e-11
DYSF	2.07189e-11	1.29979	13.8865	1.05801e-09
TMEM255A	5.83128e-11	1.3489	13.8049	2.61479e-09
GBP1	1.37596e-12	1.1629	13.7936	9.25486e-11
H2AC18	2.25386e-10	1.40421	13.5465	8.53532e-09
NTNG2	7.90103e-14	1.01405	13.2865	7.41791e-12
H2BC4	1.06806e-11	1.21056	13.2816	5.92396e-10
CCL8	1.51471e-08	1.68329	13.1628	3.37089e-07
CEACAM1	1.33027e-12	1.10752	13.153	9.04315e-11
UBE2S	4.21907e-11	1.26133	13.086	1.95007e-09
TNFSF13B	2.48203e-13	1.02589	12.9316	2.0907e-11
ANXA3	1.89897e-10	1.29727	12.6114	7.35771e-09
DNAAF1	2.25423e-06	2.20563	12.4552	2.48683e-05
SIGLEC5	4.42792e-10	1.32318	12.3767	1.54686e-08
DDX58	1.75792e-11	1.1097	11.9348	9.26559e-10
GYG1	3.40735e-11	1.11716	11.694	1.63281e-09
CLEC1B	1.05778e-09	1.30063	11.6739	3.32187e-08
CLEC5A	1.65696e-10	1.18989	11.6379	6.56449e-09
LINC02555	7.84585e-12	1.02202	11.3499	4.47561e-10
H2BC18	1.17674e-10	1.1258	11.1784	4.854e-09
TRIB1	3.58291e-10	1.10911	10.4764	1.28657e-08
IFITM2	2.35843e-10	1.08778	10.4725	8.83846e-09
C15orf48	5.72078e-07	1.67571	10.4607	7.62742e-06
CLEC4D	5.89035e-09	1.26021	10.3714	1.49971e-07
CHROMR	1.56721e-09	1.17669	10.3606	4.73208e-08
MARCO	7.66094e-11	1.01577	10.2752	3.34373e-09
SOCS3	2.54171e-10	1.06837	10.2508	9.44676e-09
TLR5	3.52484e-10	1.07225	10.1358	1.27078e-08
TASL	7.71199e-10	1.10299	10.0514	2.50932e-08
CDKN1C	5.45097e-09	1.20407	9.94986	1.41177e-07
CYSTM1	2.91638e-10	1.03978	9.91443	1.06681e-08
GBP5	2.2756e-08	1.26987	9.70547	4.73672e-07
IGHG1	4.4156e-08	1.3143	9.66666	8.39615e-07
LAG3	6.45623e-08	1.30747	9.40073	1.16032e-06
TMEM51	5.18106e-08	1.23079	8.96705	9.56904e-07
NFIL3	1.24013e-09	1.00497	8.95077	3.82785e-08
LTF	2.49896e-06	1.58699	8.8907	2.71854e-05
MMP8	4.90272e-06	1.6726	8.88077	4.89078e-05
IGF2BP3	3.84109e-08	1.19551	8.86538	7.44511e-07
TARM1	4.57225e-06	1.62954	8.70152	4.61992e-05
CACNA1E	1.08559e-08	1.08219	8.61893	2.52827e-07
S100A12	1.28251e-07	1.24909	8.60868	2.09787e-06
B4GALT5	9.43967e-09	1.02424	8.2196	2.24485e-07
LGALSL	7.96806e-09	1.00968	8.17703	1.93836e-07
TCN1	5.44319e-08	1.10072	7.9958	1.00019e-06
XK	6.16967e-07	1.27473	7.91573	8.07657e-06
GMPR	1.84712e-07	1.16153	7.8212	2.88778e-06
H3C10	1.49442e-07	1.10952	7.57305	2.40307e-06
LGALS17A	2.4229e-05	1.53796	7.09872	0.000190972
C19orf84	2.92417e-06	1.25666	6.95438	3.11347e-05
LINC01887	1.98599e-05	1.45052	6.82038	0.000160968
FAM72A	1.95e-06	1.1722	6.6932	2.19417e-05
OR52K1	4.16235e-07	1.03119	6.57968	5.79387e-06
DEFA3	7.22224e-05	1.58271	6.55452	0.000490905
SIGLEC11	1.21112e-06	1.0822	6.40317	1.45448e-05
TYMS	3.75923e-06	1.17464	6.37233	3.89001e-05
H2AC8	1.29354e-06	1.02531	6.03725	1.54216e-05
LCN2	2.31914e-05	1.28969	5.97728	0.000183838
H2AC20	3.24326e-06	1.04289	5.72447	3.41888e-05
H4C4	4.32865e-06	1.04676	5.61446	4.39348e-05
MT1G	3.69764e-06	1.013	5.50269	3.8395e-05
RGS1	1.10377e-05	1.10516	5.4784	9.79642e-05
DLGAP5	5.46414e-05	1.28315	5.46942	0.000386971
CAMP	1.67513e-05	1.1215	5.35622	0.000139216
HPD	6.84036e-06	1.02781	5.30857	6.50682e-05
ZDHHC19	4.86342e-05	1.22265	5.27336	0.000349833
RNASE3	7.69317e-06	1.0182	5.20698	7.20775e-05
CDC45	5.07973e-05	1.14125	4.90072	0.000362643
CYP2J2	5.15576e-05	1.08869	4.66798	0.000367343
FCGR3B	3.37028e-05	1.03892	4.64641	0.000255908
IFIT1B	5.99585e-05	1.09804	4.6361	0.000417786
IL18R1	2.97834e-05	1.01771	4.60619	0.000229631
B3GNT5	4.01824e-05	1.03596	4.55406	0.000297465
OLFM4	0.000877156	1.45232	4.43963	0.00399485
RAD54L	3.96582e-05	1.00494	4.42339	0.00029431
CEACAM8	0.000663672	1.28778	4.09262	0.00317583
BPI	0.000167777	1.06101	4.00561	0.000998465
MPO	0.000339773	1.14099	3.95789	0.00180831
CEACAM6	0.00248708	1.02032	2.65722	0.00962064
ELANE	0.0109878	1.07246	2.10105	0.0330441
CD1C	2.82607e-22	-1.30401	-28.0999	2.42584e-19
EIF3L	4.3494e-23	-1.03936	-23.2417	6.03095e-20
NELL2	1.13216e-14	-1.26537	-17.647	1.39965e-12
FCER1A	1.18467e-11	-1.40975	-15.4035	6.43336e-10
KLRB1	3.13801e-13	-1.09429	-13.6822	2.548e-11
ID3	7.48039e-13	-1.01998	-12.3684	5.43716e-11
TRDV2	4.02532e-08	-1.34813	-9.96971	7.76048e-07
CNTNAP3	1.87343e-08	-1.08046	-8.34913	4.03953e-07
PTGDR	9.23151e-08	-1.03159	-7.25697	1.58483e-06
CXCL8	5.09429e-05	-1.00011	-4.2934	0.000363394
TXLNGY	0.00319308	-1.46159	-3.64782	0.0118775
CLC	0.000425343	-1.02183	-3.44487	0.00219943
CNTNAP2	0.00302811	-1.08858	-2.74195	0.0113458

## Sheet: HIV
Symbol	metap	metafc	idx	metapFDRadj
OTOF	3.49976e-33	3.84873	124.914	6.52705e-29
IFI27	2.56241e-27	4.00495	106.497	1.19472e-23
PCLAF	5.84581e-26	2.97053	74.9557	1.3628e-22
TYMS	2.31898e-27	2.66658	71.0236	1.19472e-23
CDC20	1.12416e-25	2.55651	63.7828	1.74714e-22
CCNB2	8.41617e-26	2.45726	61.6156	1.44531e-22
TOP2A	8.52459e-26	2.38129	59.6973	1.44531e-22
IFI44L	5.51428e-21	2.86175	57.9747	1.65873e-18
LAG3	2.64406e-28	2.08563	57.5169	2.46558e-24
MCM4	9.16803e-27	2.14618	55.8817	2.84973e-23
ISG15	1.35257e-20	2.78438	55.3225	3.65587e-18
CDCA7	8.98956e-25	2.28114	54.8528	7.28936e-22
UHRF1	5.12957e-25	2.16217	52.5189	5.62744e-22
CD38	5.19502e-24	2.25467	52.4986	3.46026e-21
LY6E	5.96225e-25	2.16172	52.3668	5.66082e-22
CDCA5	7.03941e-25	2.10629	50.8721	6.25167e-22
CCNA2	7.43755e-26	1.96568	49.3948	1.44531e-22
GINS2	1.41976e-24	2.00967	47.9261	1.10327e-21
MT1E	7.00314e-24	2.01828	46.7328	4.50374e-21
CDC45	2.28445e-23	2.05717	46.5768	1.21728e-20
ASPM	2.33968e-25	1.86498	45.936	2.909e-22
NUSAP1	1.56863e-25	1.71062	42.431	2.25038e-22
STMN1	6.07059e-25	1.74141	42.1713	5.66082e-22
TIMD4	6.64325e-21	2.08376	42.0453	1.91669e-18
CDKN3	8.9418e-24	1.81775	41.8967	5.55882e-21
CEP55	1.99883e-23	1.84337	41.8431	1.10388e-20
OAS2	4.5682e-24	1.78013	41.5487	3.15544e-21
RTP4	9.21808e-23	1.88287	41.4898	4.1931e-20
MELK	2.32452e-25	1.68323	41.4642	2.909e-22
TK1	1.48161e-24	1.73218	41.2765	1.10528e-21
KIF11	5.62563e-25	1.65128	40.0433	5.66082e-22
RSAD2	3.20938e-17	2.39159	39.4458	3.25298e-15
NCAPG	1.49871e-23	1.70595	38.9372	8.73464e-21
EPSTI1	7.91017e-22	1.83626	38.7484	2.95049e-19
UBE2C	1.78969e-24	1.6166	38.3898	1.28376e-21
SERPING1	3.18536e-19	2.04773	37.8766	5.76766e-17
CENPM	3.44424e-22	1.74318	37.4137	1.42745e-19
IFI44	8.26174e-19	2.05023	37.0742	1.25269e-16
TPX2	2.92839e-25	1.50983	37.0412	3.4134e-22
SPATS2L	4.61305e-20	1.9141	37.011	1.07542e-17
CDK1	1.78059e-22	1.65208	35.9318	7.90665e-20
MT1F	7.81953e-27	1.35212	35.2995	2.84973e-23
BIRC5	5.05132e-23	1.56236	34.8353	2.61686e-20
OAS1	6.96836e-19	1.90266	34.5464	1.10136e-16
IDH2	4.11392e-26	1.34265	34.0843	1.09607e-22
CCNE2	5.45985e-23	1.51301	33.684	2.75206e-20
HMMR	3.79762e-22	1.55458	33.2999	1.53969e-19
APOBEC3H	8.47927e-23	1.47179	32.4848	3.95346e-20
GMNN	2.01244e-23	1.41131	32.0315	1.10388e-20
KIFC1	3.93146e-20	1.64767	31.9738	9.40023e-18
PCNA	7.89255e-23	1.44067	31.8429	3.77426e-20
MCM2	1.45726e-21	1.51894	31.6493	5.22652e-19
FBXO6	1.37783e-23	1.36478	31.1999	8.28918e-21
MT1IP	7.60796e-23	1.40673	31.115	3.73391e-20
MCM10	9.5937e-22	1.4662	30.8166	3.50829e-19
NKG7	4.7052e-22	1.4369	30.6454	1.86706e-19
GBP1	2.52952e-21	1.48064	30.4968	8.13372e-19
GZMH	2.83552e-19	1.63975	30.4131	5.2388e-17
KLHDC7B	2.03421e-21	1.44117	29.8201	7.02555e-19
OASL	1.10466e-17	1.74059	29.5149	1.21905e-15
IFI6	3.41757e-16	1.89142	29.2532	2.79552e-14
CDT1	2.81143e-20	1.44533	28.2578	7.28239e-18
NDC80	8.8969e-25	1.16691	28.0652	7.28936e-22
CENPN	3.66553e-20	1.43524	27.8952	8.87819e-18
GBP4	3.41764e-22	1.2823	27.5261	1.42745e-19
FASLG	1.02982e-19	1.44513	27.439	2.18251e-17
CHEK1	2.88903e-20	1.40238	27.4014	7.38088e-18
MX1	4.78304e-17	1.65772	27.0545	4.64603e-15
CD8A	2.28926e-18	1.49633	26.3957	3.00667e-16
OAS3	6.73929e-15	1.82567	25.8723	4.06757e-13
LAP3	2.81657e-18	1.47038	25.8056	3.64785e-16
CHI3L2	9.36489e-18	1.49737	25.498	1.05852e-15
NME1	1.18864e-20	1.27898	25.4836	3.26003e-18
IFITM3	6.86434e-15	1.7981	25.4673	4.12866e-13
FANCI	2.12701e-21	1.23041	25.4353	7.08371e-19
GZMA	1.01504e-19	1.33664	25.3875	2.17593e-17
PLK4	4.21335e-20	1.30279	25.242	9.94671e-18
IFI35	6.50583e-20	1.31188	25.1707	1.44445e-17
SCD	1.75837e-18	1.41599	25.1408	2.35925e-16
RAD51AP1	5.07555e-22	1.15929	24.6865	1.97206e-19
KIF14	5.49469e-21	1.21021	24.5189	1.65873e-18
AURKA	6.83993e-19	1.33719	24.29	1.0903e-16
GZMB	1.3668e-16	1.51564	24.0446	1.21966e-14
UBE2T	1.14892e-18	1.33483	23.9465	1.63568e-16
PRC1	6.52489e-19	1.31605	23.9329	1.04904e-16
CCNF	2.8371e-19	1.28784	23.8857	5.2388e-17
MCM6	1.68717e-21	1.1392	23.6645	5.93694e-19
ZWINT	7.80802e-20	1.23744	23.6443	1.71317e-17
POLE2	1.99014e-20	1.17357	23.1206	5.30231e-18
TRIP13	1.05585e-19	1.21776	23.1087	2.21254e-17
BST2	7.11226e-22	1.08752	22.9988	2.70701e-19
RBBP8	2.20401e-22	1.04949	22.7286	9.55927e-20
KIF2C	2.38376e-20	1.14228	22.4146	6.26156e-18
STIL	1.53511e-18	1.23888	22.0693	2.10513e-16
ATAD2	5.43064e-19	1.20512	22.0117	9.12446e-17
IGKV1D	9.09649e-13	1.82675	21.9962	3.28142e-11
CKS2	7.15875e-19	1.20868	21.9318	1.12194e-16
PRF1	1.10426e-18	1.2106	21.7386	1.58419e-16
XAF1	2.44179e-16	1.38915	21.6878	2.05132e-14
CENPA	6.46761e-19	1.18487	21.5519	1.04904e-16
POLQ	3.16765e-18	1.22651	21.463	4.07426e-16
PHGDH	3.19313e-18	1.22622	21.4538	4.07889e-16
TTK	2.206e-19	1.13798	21.2306	4.24144e-17
DTL	8.22263e-19	1.16968	21.1536	1.25269e-16
CMPK2	3.39375e-14	1.55239	20.9096	1.67887e-12
IFIT1	6.15094e-12	1.79053	20.0738	1.85024e-10
CDCA8	1.15216e-19	1.05939	20.0632	2.33562e-17
DDX60	9.77845e-16	1.3355	20.0454	7.4741e-14
CKAP2L	3.05564e-19	1.08256	20.0434	5.58703e-17
APOBEC3G	1.67352e-19	1.06514	19.9995	3.32034e-17
TIMELESS	6.24326e-19	1.09721	19.9743	1.03041e-16
PYHIN1	4.55129e-19	1.08448	19.8913	7.8594e-17
DEPDC1B	3.26748e-19	1.06641	19.7135	5.85947e-17
SLC27A2	1.82287e-17	1.1683	19.5564	1.96512e-15
FBXO5	7.81724e-19	1.06926	19.3611	1.21493e-16
HJURP	2.25609e-19	1.03326	19.2668	4.25629e-17
CHAF1B	1.89796e-19	1.02021	19.1001	3.68718e-17
CENPE	4.32432e-19	1.03486	19.0042	7.57617e-17
SLAMF7	1.24985e-19	1.00289	18.9578	2.50643e-17
H2AX	9.43482e-18	1.10329	18.7838	1.06e-15
KIF20A	8.66134e-18	1.09535	18.6894	9.91006e-16
LGALS3BP	1.72953e-16	1.15114	18.1443	1.52149e-14
RACGAP1	5.25962e-17	1.09091	17.759	5.03035e-15
GFI1	1.23683e-17	1.04785	17.7168	1.34894e-15
CENPW	5.521e-17	1.08492	17.6386	5.2534e-15
EZH2	2.70043e-17	1.05756	17.5222	2.7672e-15
MND1	2.57477e-17	1.0464	17.359	2.65301e-15
CD8B	4.6604e-15	1.21059	17.3497	2.96643e-13
CXCL10	7.21522e-11	1.69159	17.1556	1.70983e-09
IFIT3	1.26215e-11	1.56632	17.0712	3.52911e-10
CD8B2	9.745e-14	1.28997	16.7841	4.29656e-12
SDF2L1	6.06862e-17	1.03313	16.7541	5.68742e-15
HERC5	7.30639e-12	1.46806	16.3488	2.16981e-10
PARPBP	2.12962e-16	1.03987	16.2965	1.81358e-14
NEK2	2.75051e-15	1.11883	16.2908	1.87901e-13
BATF2	1.42114e-14	1.17245	16.2353	7.81836e-13
SAMD3	1.6934e-16	1.02697	16.1966	1.49677e-14
IFNG	4.10555e-14	1.20863	16.1795	1.98879e-12
MT1A	6.64011e-15	1.13963	16.1575	4.02071e-13
HERC6	7.12556e-14	1.22722	16.1345	3.32229e-12
C1QB	1.21626e-12	1.34999	16.0851	4.2718e-11
DHFR	3.37202e-16	1.03347	15.9899	2.77515e-14
MT1G	4.06605e-15	1.09549	15.765	2.63305e-13
MAD2L1	2.76024e-14	1.15775	15.6979	1.38383e-12
IRF7	9.31381e-14	1.19321	15.5486	4.13577e-12
ACOT7	2.81844e-15	1.06494	15.4948	1.91839e-13
C12orf75	2.36536e-15	1.02652	15.014	1.63385e-13
KLRD1	7.40207e-14	1.12996	14.8371	3.42553e-12
RNF213	1.07192e-14	1.03815	14.5028	6.17016e-13
TGFBR3	1.68376e-14	1.04985	14.4603	8.99774e-13
TIMM10	3.84912e-12	1.26383	14.4262	1.22711e-10
IGLV8	1.235e-09	1.60627	14.3092	2.16677e-08
SAMD9L	8.34978e-14	1.0773	14.0892	3.78889e-12
HSPE1	1.40515e-13	1.07271	13.7868	5.99679e-12
MZB1	2.72359e-10	1.44006	13.774	5.58186e-09
JCHAIN	7.57769e-10	1.50748	13.749	1.39098e-08
CLIC3	5.46656e-13	1.11537	13.677	2.09776e-11
PLSCR1	5.30809e-12	1.20921	13.6339	1.60969e-10
ZBP1	4.90519e-13	1.07948	13.2876	1.89012e-11
FGFBP2	6.33376e-12	1.15512	12.9354	1.90217e-10
EIF2AK2	9.17194e-13	1.07393	12.9275	3.30225e-11
CXCR6	5.24548e-12	1.11934	12.6264	1.59546e-10
IGLL1	1.00883e-11	1.13486	12.4791	2.87248e-10
SPON2	1.79239e-12	1.00963	11.8597	6.04485e-11
IGKV5	9.90077e-09	1.46385	11.7171	1.3873e-07
DHX58	2.62185e-11	1.0426	11.0322	6.80076e-10
HES4	8.51745e-09	1.31785	10.6346	1.21725e-07
TNFRSF17	6.48318e-07	1.26902	7.85299	5.84678e-06
GLDC	1.84349e-07	1.04697	7.0507	1.89219e-06
CCL2	8.00796e-07	1.06944	6.51982	7.07477e-06
DEFA1	1.27015e-05	1.2876	6.30428	8.5446e-05
DEFA3	1.94508e-05	1.24961	5.88698	0.000124659
DEFA1B	2.66848e-05	1.20554	5.51383	0.00016589
NELL2	2.11878e-21	-1.37432	-28.4125	7.08371e-19
OSBP2	1.22369e-12	-2.06854	-24.6412	4.28982e-11
TNS1	1.89093e-13	-1.89443	-24.1035	7.85429e-12
PDZK1IP1	5.05763e-12	-2.08268	-23.5261	1.54631e-10
CXCR5	3.43208e-20	-1.20404	-23.4359	8.64977e-18
MPZL1	4.76316e-17	-1.36411	-22.2651	4.64603e-15
ZSCAN18	5.64761e-20	-1.14011	-21.945	1.28449e-17
ID3	5.73412e-21	-1.07199	-21.6987	1.69748e-18
EPB42	4.40192e-11	-1.95132	-20.2085	1.10048e-09
AXIN2	1.06772e-19	-1.05418	-19.9995	2.21256e-17
IMPA2	2.60757e-18	-1.11243	-19.5608	3.40078e-16
CAMK1D	3.5425e-18	-1.10057	-19.2058	4.40451e-16
SRRD	1.46158e-14	-1.3866	-19.1839	7.94707e-13
ARL4A	3.59301e-14	-1.3629	-18.3236	1.76341e-12
FCER1A	3.82932e-14	-1.24829	-16.7481	1.86401e-12
ODAD4	5.54183e-14	-1.26117	-16.7185	2.62323e-12
MARCHF8	3.94263e-11	-1.59516	-16.5964	9.96343e-10
FAXDC2	2.37943e-12	-1.42152	-16.523	7.77169e-11
FCRL2	2.2195e-15	-1.12072	-16.4227	1.55033e-13
IGF1R	3.04111e-15	-1.1262	-16.349	2.04753e-13
FAM153B	2.44257e-14	-1.18687	-16.1558	1.24125e-12
VPREB3	1.4848e-14	-1.1499	-15.9013	8.04985e-13
TMOD1	2.24771e-10	-1.6465	-15.8858	4.7048e-09
RUBCNL	1.11121e-15	-1.05554	-15.7847	8.35645e-14
PLEK2	8.69405e-12	-1.427	-15.7837	2.51386e-10
SELENBP1	3.68248e-09	-1.8505	-15.6069	5.80052e-08
IL1RAP	8.39269e-15	-1.09362	-15.3939	4.92213e-13
SEC14L1	1.91452e-15	-1.04406	-15.3664	1.35249e-13
SLC4A1	2.49609e-09	-1.77714	-15.2883	4.06494e-08
TSPAN5	1.14178e-10	-1.53598	-15.2714	2.60002e-09
KRT1	4.08858e-09	-1.80435	-15.1356	6.33848e-08
BSG	7.61861e-12	-1.3413	-14.9128	2.24466e-10
OR2W3	1.30621e-10	-1.4996	-14.822	2.93151e-09
TREML3P	3.47342e-13	-1.18641	-14.7817	1.38714e-11
MICAL2	1.47678e-10	-1.49068	-14.6544	3.24788e-09
SESN3	6.39731e-10	-1.58899	-14.6092	1.19549e-08
MCOLN1	1.16779e-13	-1.11323	-14.397	5.05322e-12
FAM210B	1.84532e-10	-1.46769	-14.2864	3.93768e-09
SH3BGRL2	1.28652e-13	-1.10116	-14.1946	5.50311e-12
CR1	1.50031e-13	-1.10129	-14.1227	6.33049e-12
HEMGN	1.17338e-10	-1.4204	-14.1054	2.659e-09
GUCD1	6.9624e-14	-1.02394	-13.4722	3.26253e-12
RAB3IL1	2.12472e-10	-1.38139	-13.3617	4.47246e-09
BBOF1	2.44293e-12	-1.14197	-13.2606	7.95125e-11
GPR146	1.35486e-12	-1.11145	-13.1908	4.71422e-11
LRRN3	1.56509e-11	-1.17394	-12.685	4.24875e-10
DPM2	9.71654e-11	-1.26513	-12.6671	2.2372e-09
FCRLA	1.30955e-12	-1.0545	-12.5305	4.57362e-11
FECH	4.41633e-09	-1.43671	-12.0037	6.78456e-08
NFIX	6.1079e-11	-1.16468	-11.8962	1.47173e-09
CABP5	2.97702e-12	-1.03161	-11.8905	9.57267e-11
DPCD	1.6073e-10	-1.21306	-11.8806	3.48559e-09
CMTM2	2.21956e-12	-1.01133	-11.7857	7.30068e-11
TGM2	1.52268e-10	-1.1971	-11.7524	3.33309e-09
MPP1	2.49346e-11	-1.10079	-11.6719	6.49484e-10
CA1	1.9704e-08	-1.48139	-11.4148	2.55727e-07
GLUL	4.49852e-11	-1.09257	-11.3048	1.12246e-09
GMPR	2.49782e-09	-1.31397	-11.3033	4.06494e-08
HPS1	8.21399e-10	-1.23111	-11.1852	1.496e-08
RNF11	5.33567e-11	-1.08653	-11.1617	1.29909e-09
FBXO7	9.34756e-10	-1.23585	-11.1589	1.6795e-08
MAP2K3	4.81928e-11	-1.0768	-11.1093	1.18888e-09
STRADB	1.7903e-08	-1.41975	-10.9989	2.34639e-07
BCL2L1	1.03241e-09	-1.22367	-10.9961	1.83309e-08
LGALS3	1.00211e-09	-1.22072	-10.9853	1.78846e-08
GATA1	1.19293e-10	-1.08493	-10.7662	2.69674e-09
NINJ2	2.30131e-10	-1.11537	-10.7499	4.8062e-09
JAM3	2.97628e-11	-1.01427	-10.6765	7.65732e-10
BNIP3L	8.67935e-11	-1.03339	-10.3975	2.02085e-09
ADIPOR1	4.32266e-10	-1.08529	-10.163	8.45935e-09
KLF1	3.04478e-09	-1.16845	-9.95101	4.89527e-08
SNCA	2.03743e-08	-1.29191	-9.936	2.63509e-07
PITHD1	9.36824e-10	-1.06221	-9.58997	1.68159e-08
ALPL	9.94504e-08	-1.36361	-9.54851	1.09231e-06
RBM38	1.13666e-08	-1.17036	-9.29777	1.56564e-07
DCAF12	1.58746e-08	-1.17986	-9.20211	2.10122e-07
FOXO3	2.12287e-09	-1.05582	-9.15722	3.54445e-08
CDC34	5.62981e-09	-1.10951	-9.15289	8.37956e-08
MXI1	4.48678e-09	-1.09439	-9.13607	6.8758e-08
YOD1	2.40324e-09	-1.03152	-8.89089	3.94199e-08
TUBB2A	7.94003e-06	-1.72478	-8.79666	5.62834e-05
BLVRB	2.88487e-08	-1.15751	-8.72747	3.58447e-07
SLC25A37	3.79923e-09	-1.00993	-8.50395	5.95926e-08
SLC14A1	3.6466e-08	-1.11756	-8.31255	4.41066e-07
HAGH	3.56638e-08	-1.06731	-7.94908	4.32465e-07
DMTN	3.58811e-07	-1.19295	-7.6887	3.44407e-06
MBNL3	9.35111e-08	-1.07856	-7.58136	1.03685e-06
TESC	1.18412e-06	-1.18098	-6.9992	1.00318e-05
RUNDC3A	4.71713e-06	-1.20605	-6.42381	3.52744e-05
TRIM58	2.3124e-06	-1.01935	-5.74499	1.84695e-05
SLC6A8	4.91323e-06	-1.08025	-5.73465	3.65941e-05
SMIM1	2.58633e-05	-1.15588	-5.3024	0.000161321
HBD	7.36119e-06	-1.02765	-5.27498	5.23993e-05
IFIT1B	1.53568e-05	-1.03859	-4.99947	0.000100811
RBPMS2	0.000647394	-1.00787	-3.21394	0.00285794

## Sheet: YFV
Symbol	logFC	logCPM	F	PValue	Padj_FDR
SLC2A5	2.80724	3.08661	26.9084	2.66963e-06	0.000262602
TP73	2.92077	1.42129	20.1095	3.37262e-05	0.00143109
FBXO6	1.0317	3.22232	11.8793	0.00104448	0.0164046
SDC3	1.95093	1.30174	17.9649	7.90314e-05	0.002659
PTPRU	2.52713	0.66138	14.9944	0.000269587	0.00651764
CDCA8	1.94234	2.84333	21.9243	1.6745e-05	0.000846182
ANO7L1	1.98611	1.12707	10.9264	0.00160573	0.0218495
CLSPN	2.10052	2.6072	25.162	5.01088e-06	0.000386648
RAD54L	3.11442	0.761545	13.7681	0.000455392	0.00929981
DHCR24	1.46158	3.81077	20.9648	2.4192e-05	0.00112803
LINC01358	2.30128	0.41394	10.3463	0.00209478	0.026131
ADORA3	2.45529	0.388831	11.6011	0.00118324	0.0177088
CKS1B	1.43275	5.60934	35.5905	1.41404e-07	4.55533e-05
S100A8	1.33511	12.3113	13.5314	0.000504555	0.00990594
C1orf112	1.10227	1.83486	9.64746	0.00289788	0.0328128
FCRL5	1.19697	4.43152	12.0584	0.000964203	0.0155414
UBE2T	2.32594	2.20168	21.5532	1.92942e-05	0.000948951
NUF2	1.86126	2.76055	27.1747	2.42827e-06	0.000254622
CREG1	1.29122	5.35368	21.9138	1.68116e-05	0.000846226
DTL	2.14845	2.03814	30.7628	6.9774e-07	0.000102171
MRPS14	1.10387	4.22655	18.8376	5.5703e-05	0.00202524
NEK2	2.2806	0.271954	12.6159	0.000753059	0.0130605
C1orf74	1.13463	1.49633	11.8988	0.00103539	0.0163906
CENPF	1.04735	2.78038	8.73759	0.00445494	0.0442609
ZNF670	1.52928	1.60338	14.8267	0.000289435	0.00680595
E2F2	2.0941	7.17297	31.8205	4.88058e-07	8.61715e-05
CENPS	1.08824	2.114	10.5591	0.00189942	0.0244271
LAX1	1.01659	2.45186	8.95087	0.00402456	0.0411453
FAM89A	1.34575	2.37193	11.638	0.00116375	0.0175187
AUNIP	2.33605	0.716108	12.5012	0.000792157	0.0135561
STMN1	1.32851	7.42355	28.7629	1.3887e-06	0.000168819
KIF2C	2.53305	2.26208	28.935	1.30797e-06	0.000163636
C1QC	2.71861	3.17238	28.3042	1.63008e-06	0.000187546
C1QB	1.54266	5.34736	11.7951	0.00108459	0.0168386
PHGDH	1.67752	3.34224	19.7717	3.84982e-05	0.00152323
RAB13	1.13517	4.25783	12.5355	0.000780236	0.0134234
NEXN	2.15398	3.76326	24.6973	5.9392e-06	0.000426725
RGL1	2.6437	4.72017	42.6131	1.60683e-08	1.24223e-05
SLC6A9	3.48999	0.370883	21.986	1.63562e-05	0.000835881
ORC1	1.42265	1.5651	11.7259	0.00111873	0.0171618
CNIH4	1.25798	6.31316	13.6882	0.000471404	0.00947662
HLX	1.23893	5.58576	13.0045	0.000634805	0.0116692
IFI16	1.77926	7.31522	10.6434	0.00182735	0.0238091
EPHB2	1.96487	4.33353	22.3403	1.42974e-05	0.000770862
GBP1	1.21269	5.42587	12.7658	0.000704925	0.0125417
LINC02574	3.40341	0.62692	37.0898	8.76536e-08	3.05271e-05
IFI6	3.73111	1.37293	28.0292	1.79526e-06	0.000201163
IFI44L	2.37817	7.08517	45.1811	7.5425e-09	8.09939e-06
ISG15	2.9317	9.67723	33.0298	3.26096e-07	6.94946e-05
IFI44	2.37589	4.73082	20.0564	3.44331e-05	0.00143944
ADAR	1.01462	7.79088	15.8708	0.000186564	0.00491629
CDC20	2.29909	3.34071	20.658	2.72417e-05	0.00122312
ASPM	1.61656	1.20058	11.3787	0.00130796	0.0189902
CRYZ	1.17963	2.62019	9.75048	0.00276165	0.0316343
B4GALT2	1.18883	4.5594	16.4876	0.000144437	0.00403734
STIL	1.8498	2.74189	8.66969	0.00460189	0.0452671
HPDL	2.55689	0.299139	12.8182	0.000688865	0.0123066
ZNF684	1.19341	1.24271	8.94009	0.00404522	0.0412395
MNDA	1.09293	5.69671	9.8984	0.00257767	0.0304453
EXO1	2.17225	0.454327	12.111	0.000941858	0.0153566
COL8A2	1.2685	2.51048	10.4737	0.00197544	0.0249809
PHC2	1.15875	6.96799	10.5272	0.0019274	0.0246639
CENPA	1.73227	1.51044	11.4799	0.00124954	0.0183599
PNPT1	1.40789	3.54412	20.3666	3.05079e-05	0.00133262
GALM	1.02463	5.44295	20.0802	3.4114e-05	0.00143779
SOCAR	2.11529	2.90104	16.2768	0.000157595	0.00433924
IGFBP2	2.11046	3.70837	10.282	0.00215784	0.0267364
IL1R2	3.934	7.08048	19.7251	4.02802e-05	0.00157766
SGO2	1.88786	0.939692	11.9836	0.0009969	0.0159578
CKAP2L	1.76066	1.29509	11.7117	0.00112588	0.0172306
BARD1	1.04907	3.57549	20.2103	3.24237e-05	0.00138811
MERTK	1.39711	4.38692	15.4251	0.000224827	0.00563642
ITM2C	1.80178	3.22554	13.5292	0.000505023	0.00990594
SPATS2L	2.5301	4.46596	50.4581	1.69087e-09	2.42095e-06
FZD5	1.31645	2.19138	14.0377	0.000405436	0.00855065
TMEM37	2.23893	1.08299	8.39843	0.00524158	0.0492204
HJURP	2.16801	3.10722	20.6934	2.687e-05	0.00121605
SPC25	2.85846	1.63634	31.138	6.14328e-07	9.53763e-05
PDIA6	1.22643	8.55976	18.8234	5.602e-05	0.00202774
SLC16A14	1.77161	0.807464	8.54593	0.00488292	0.0468707
NAT8B	1.69388	1.59785	9.2716	0.00345754	0.0374088
IDH1	1.60505	6.00891	17.2875	0.000104025	0.00319158
CCDC150	2.10274	0.537975	14.1792	0.000381537	0.00819801
PGAP1	1.25588	4.18598	17.5893	9.2004e-05	0.00294185
CHROMR	1.34191	2.86324	26.5907	2.99048e-06	0.00027619
RRM2	2.16103	5.97053	29.1652	1.20751e-06	0.000155733
CHPF	1.22745	4.03437	10.7271	0.0017587	0.0232915
SDC1	2.49	1.9178	13.6302	0.000483393	0.00959785
BUB1	2.75375	1.38094	22.8798	1.16643e-05	0.000659239
OTOF	4.41373	6.2095	62.5066	7.22297e-11	1.8615e-07
IFIH1	1.73184	4.33629	17.4764	9.63245e-05	0.00304973
EIF2AK2	1.61722	5.87041	38.2514	6.08406e-08	2.38437e-05
LINC00487	2.53891	3.05569	23.3727	9.69731e-06	0.000583923
NRIR	3.03883	3.12263	40.7773	2.79334e-08	1.39429e-05
RSAD2	3.63279	6.77348	42.2699	1.78042e-08	1.24223e-05
NMI	1.27897	4.40997	25.0601	5.20068e-06	0.000392145
CMPK2	2.94425	6.79118	56.703	3.16278e-10	6.7926e-07
ANKRD36BP2	2.04821	1.21822	13.7692	0.000455188	0.00929981
IGKC	3.12859	13.4555	32.4869	3.90535e-07	7.7422e-05
RUFY4	1.52809	5.59986	10.6537	0.0018188	0.0237484
SGO1	1.7314	0.612872	8.41797	0.00519253	0.0489115
HESX1	2.99542	0.462794	13.7399	0.00046099	0.00936959
MANF	1.38014	6.26698	13.2569	0.000568523	0.0107105
ACOX2	2.99869	0.653077	16.056	0.000172719	0.00460798
PDIA5	1.38974	2.1981	10.9755	0.00157021	0.0214796
TM4SF1	3.02739	2.01614	13.2388	0.00057303	0.0107639
TNFSF10	1.59748	6.17892	17.1057	0.000112042	0.00335832
MCM2	1.50428	4.37833	19.8013	3.80536e-05	0.00151834
LAMP3	3.41573	3.14422	18.9436	5.34027e-05	0.00196053
DTX3L	1.17718	8.0406	19.4833	4.31272e-05	0.00166888
RTP4	1.94179	2.81393	21.441	2.01415e-05	0.000979408
STIMATE	1.04962	1.78796	9.24645	0.00349883	0.0376731
TIMP4	4.11785	0.802754	22.2977	1.45303e-05	0.000776917
PLSCR1	1.40432	5.60999	16.4947	0.000144012	0.00403734
POC1A	1.27684	4.44754	13.634	0.000482604	0.00959697
ECT2	1.49093	1.53178	9.3571	0.00332099	0.0363897
SLC12A8	2.293	0.397419	10.6853	0.00179266	0.0235716
RFC4	1.08827	3.99403	22.1529	1.53506e-05	0.000797614
CDC25A	2.44876	2.59998	31.0103	6.41487e-07	9.70139e-05
CCR2	1.32001	5.17915	10.7045	0.00177697	0.0234371
POLQ	1.78879	1.44945	12.8399	0.000682335	0.0122289
PARP9	1.75691	4.98448	21.7736	1.77349e-05	0.000882364
S100P	1.44808	5.33885	10.4681	0.00198052	0.0250193
UCHL1	3.43044	2.08562	30.006	9.03565e-07	0.000126558
STAP1	1.16441	3.50775	10.1218	0.00232367	0.0283399
CXCL3	1.48322	4.28344	11.1755	0.00143388	0.020159
CENPE	1.27577	1.45435	9.01721	0.00389977	0.0402986
IRF2	1.40907	3.9536	21.4885	1.97787e-05	0.000965411
SAP30	1.57484	2.63596	12.4138	0.000823395	0.0139977
NCAPG	2.40081	3.38269	29.921	9.30311e-07	0.000128903
CD38	1.86825	6.7461	28.7824	1.37933e-06	0.000168819
CCNA2	2.83367	2.75846	34.0593	2.32374e-07	5.75841e-05
JCHAIN	2.83065	9.9822	29.7747	9.78317e-07	0.000132701
CENPU	1.76812	2.81955	17.0796	0.00011324	0.00337781
HERC6	1.76382	4.94142	17.7408	8.65262e-05	0.00282272
HERC5	2.32397	5.30142	25.8284	3.9341e-06	0.000322897
PLAC8	1.70122	7.48844	38.4713	5.68074e-08	2.36135e-05
DDX60	1.49493	3.02437	18.1389	7.36802e-05	0.00250352
PI4K2B	1.7358	2.7512	24.0646	7.49837e-06	0.000490477
SLC39A8	1.36635	3.66699	9.02631	0.00388297	0.0402175
CXCL10	3.61137	4.33226	14.3072	0.000367045	0.00803013
WFS1	1.12746	2.37678	10.8015	0.0016999	0.0227465
TRIP13	2.13365	1.52447	16.4064	0.000149364	0.00413916
CENPH	1.15471	3.31457	20.9724	2.41214e-05	0.00112803
CD180	1.23757	2.93871	8.58225	0.00479861	0.046353
LMNB1	1.18703	5.22682	19.8517	3.73083e-05	0.00150236
CCNB1	1.63829	2.15905	19.3975	4.46125e-05	0.00171094
ADAMTS2	2.55314	2.7933	11.5128	0.00123121	0.0182151
KIF20A	2.55213	1.06728	14.6278	0.000314974	0.00714569
SH3PXD2B	1.36061	2.37625	8.96869	0.00399064	0.0409422
PTTG1	1.35329	6.333	36.7753	9.68405e-08	3.28391e-05
TIMD4	1.63829	2.99034	14.7713	0.00029633	0.00690509
HMMR	1.80671	1.49685	11.5379	0.00121738	0.0180727
SCARNA18	2.47087	1.09085	13.2149	0.000579036	0.0108377
MZB1	2.76188	6.42339	25.9509	3.76384e-06	0.000313656
CYSTM1	1.03618	4.79296	9.12321	0.00370869	0.0390443
GPRIN1	1.23602	0.719203	11.2591	0.00138062	0.0197018
SLC1A3	2.11613	1.18896	14.6694	0.000309442	0.00705831
CDC25C	2.47669	1.92541	21.3608	2.07711e-05	0.000991319
SMIM3	1.12104	6.03987	11.3484	0.00132599	0.019177
FAM50B	1.31002	1.27817	12.035	0.000974299	0.0156349
PPIL1	1.50756	3.83533	25.7591	4.03393e-06	0.000324883
ENPP4	1.0484	3.50894	14.7824	0.000294939	0.00688512
MCM3	1.07876	5.66632	13.1926	0.000584691	0.0109193
MAN1A1	1.20249	5.09225	25.7948	3.98214e-06	0.000323878
TNFRSF21	1.3863	3.05583	13.4591	0.000520642	0.0100736
TTK	2.20241	1.37339	22.3533	1.42271e-05	0.000770296
SOBP	2.12174	1.44063	16.5576	0.000140321	0.00399155
OR2B6	2.696	1.47608	10.7967	0.00170362	0.0227724
H2AC14	2.45296	0.552254	14.8494	0.000286665	0.00676549
GMPR	2.03192	5.84644	23.072	1.08521e-05	0.000618763
TCF19	1.23034	3.79902	14.9645	0.000273019	0.00657592
CENPW	1.40893	3.74217	24.6374	6.07133e-06	0.000432239
FKBP5	1.56248	6.02788	28.4794	1.53317e-06	0.000181251
ETV7	1.51961	3.16337	10.4022	0.00204145	0.0256744
GMNN	1.09602	3.29432	16.3886	0.000150464	0.00416067
MYCT1	2.11889	1.04462	11.5215	0.0012264	0.0181648
KIFC1	1.87955	2.3685	18.3215	6.84686e-05	0.00235276
BYSL	1.04246	3.40365	16.9527	0.00011928	0.0034946
H4C8	1.64474	3.49737	19.2905	4.65397e-05	0.00176675
ANLN	1.91119	1.75571	11.7075	0.00112801	0.0172426
MLXIPL	1.93346	1.92715	10.0698	0.00238034	0.0286807
SAMD9L	1.79065	4.72354	14.2157	0.000375601	0.00816189
SAMD9	1.27394	4.08217	13.5578	0.000498808	0.0098282
PDK4	2.31138	2.46225	14.665	0.000310027	0.00705831
PARP12	1.09256	6.93575	17.1051	0.000112065	0.00335832
ABCF2	1.03715	4.67724	17.3879	9.98537e-05	0.00312309
CAV1	1.61119	1.04726	8.44205	0.00513272	0.0484899
BHLHA15	2.94304	2.41585	26.428	3.17004e-06	0.000287179
STAG3	1.48832	4.11978	11.9683	0.00100373	0.0159878
NT5C3A	1.4712	5.51399	21.4273	2.02478e-05	0.000979946
PDIA4	1.67577	6.99789	18.7787	5.70251e-05	0.00204687
VSIG4	2.48724	5.833	17.6207	9.08415e-05	0.00292646
JADE3	1.58509	0.86239	8.99463	0.00394178	0.0405381
KIF4A	1.943	2.45705	20.9057	2.47512e-05	0.00114317
TCEAL9	1.362	3.18375	10.3775	0.00206486	0.025858
NXF3	5.13822	3.63408	13.754	0.000465161	0.00940983
MIR503HG	1.72146	0.770091	8.94824	0.0040296	0.0411453
SLC38A5	1.56743	5.15799	16.7963	0.00012719	0.00368307
C1GALT1C1	1.12683	2.56387	11.7898	0.00108713	0.0168563
PRDX4	1.15375	4.75507	25.0976	5.1301e-06	0.000392145
CENPI	1.26881	1.11019	8.61929	0.00471423	0.0458818
ESCO2	1.56401	0.595375	8.39072	0.00526105	0.0492331
MIR124-1HG	2.85601	2.70526	10.1209	0.00232464	0.0283399
DEFB1	3.19827	2.95007	22.8571	1.17642e-05	0.00066198
DEFA3	2.52553	0.738967	8.43125	0.00515945	0.0487067
CDCA2	2.25565	1.5464	19.5954	4.12624e-05	0.00161123
ADAMDEC1	2.10903	0.304591	8.51816	0.00494843	0.0472687
PBK	3.82631	0.160652	21.3879	2.05563e-05	0.000988388
ASH2L	1.26135	2.98951	15.0228	0.000266366	0.00646401
MCM4	1.57314	4.52409	29.7804	9.76388e-07	0.000132701
GINS4	1.40958	1.38622	13.1642	0.000591986	0.0110077
DSCC1	2.35903	0.775055	19.2815	4.67043e-05	0.00176675
SLA	1.06229	6.88631	11.5945	0.00118672	0.0177402
LY6E	1.76606	8.6803	42.2225	1.80588e-08	1.24223e-05
RECQL4	1.51619	3.32961	21.7245	1.80707e-05	0.000895613
GGH	1.83976	3.89243	10.5485	0.0019087	0.0245091
PDCD1LG2	2.26837	0.331392	13.3921	0.000536013	0.0102784
PSAT1	2.12357	2.43102	25.2533	4.84699e-06	0.000376255
GCNT1	1.3574	2.09719	18.8694	5.50024e-05	0.00200782
SMC2	1.25805	2.8265	20.2962	3.13558e-05	0.00135587
MELK	2.45969	1.45108	24.6875	5.96077e-06	0.000426725
CHMP5	1.27466	6.50717	9.441	0.00319246	0.0352814
CTSL	1.55445	5.83591	14.8553	0.000285946	0.00676549
DOLK	1.11628	1.01545	9.84795	0.00263893	0.0307739
INCENP	1.10295	2.23811	12.9546	0.000648856	0.0118262
CAVIN3	2.12816	3.66005	11.8751	0.00104645	0.0164046
ABTB2	1.8626	3.27018	26.0773	3.59602e-06	0.000302865
MS4A3	2.54179	1.01991	11.8803	0.00104401	0.0164046
CDCA5	2.92622	2.14998	42.1753	1.83162e-08	1.24223e-05
POLD3	1.22355	2.58706	30.6741	7.1911e-07	0.000104117
TUBAP2	2.88899	1.1052	17.8563	8.25771e-05	0.0027425
POU2AF1	2.67271	5.86205	29.1499	1.21397e-06	0.000155733
SLCO2B1	4.16614	0.679231	29.5346	1.06272e-06	0.000141177
SPCS2	1.23319	3.13939	13.2131	0.000579481	0.0108377
FXYD6	1.12707	5.62002	11.1451	0.00145375	0.0203842
ZW10	1.03114	3.70264	23.5996	8.91056e-06	0.000557386
SERPINH1	2.61648	3.91324	15.4636	0.000221222	0.00556771
BATF2	2.27967	1.25215	14.7311	0.000301431	0.00699863
HBD	2.50813	3.96066	12.6444	0.00074365	0.0129496
HBG2	3.2131	2.37796	17.0967	0.000112451	0.00336206
TRIM22	1.19089	7.00539	21.3437	2.09082e-05	0.000994182
FAM111B	1.76034	0.516411	8.36099	0.00533695	0.0496971
DRAP1	1.124	6.74204	12.1706	0.000917225	0.0151725
FEN1	1.48239	4.66804	15.245	0.000242523	0.00597543
RAB3IL1	2.64837	0.531028	13.8171	0.000445868	0.00920746
PLAAT2	2.49542	4.1843	20.4844	2.91404e-05	0.00129484
IRF7	1.7247	7.05473	26.1096	3.55449e-06	0.000302865
DCPS	1.12674	4.96897	15.9899	0.000177532	0.00470715
SERPING1	1.5186	6.35896	12.74	0.000712971	0.0126009
CADM1	1.36767	2.9434	8.98808	0.00395406	0.0406316
MS4A4A	2.13312	4.65263	23.6154	8.85852e-06	0.000556834
P2RY6	2.26377	2.99242	31.4832	5.46709e-07	9.03191e-05
IFITM1	3.28046	1.99834	18.7317	5.81049e-05	0.00206834
IFITM3	1.42514	11.1354	11.6282	0.0011689	0.0175627
KCTD14	4.13211	1.43001	41.3547	2.34474e-08	1.39429e-05
MRPL17	1.13897	3.41761	24.405	6.61284e-06	0.000455685
MYO7A	1.56941	2.96242	15.8348	0.000189385	0.00496019
ST14	1.48235	4.67459	24.6903	5.95451e-06	0.000426725
MDK	1.35913	1.77836	8.60226	0.00475284	0.046049
CYB5R2	1.82739	2.70594	12.0977	0.000947458	0.0153572
OR52N4	1.53964	1.22342	9.53024	0.00306146	0.0342274
ECHDC3	2.31656	0.749673	11.0189	0.00153955	0.0211724
CDK1	2.65606	3.31885	34.6534	1.91444e-07	5.35492e-05
ZWINT	2.2435	3.51019	31.9341	4.69803e-07	8.5266e-05
ANKRD22	1.62278	3.42865	10.145	0.00229884	0.028079
DEPP1	3.53888	2.05381	34.2833	2.1597e-07	5.45684e-05
PKD2L1	2.0498	3.21317	15.4839	0.000219342	0.00555293
MKI67	1.94891	4.44912	33.2359	3.0461e-07	6.88633e-05
PRDX3	1.0891	5.43929	8.86789	0.00418658	0.0422792
RNA5SP304	2.61548	0.617906	15.2217	0.00024491	0.00599982
CASP7	1.05161	4.05099	17.6807	8.86579e-05	0.00286327
BLNK	1.6222	2.04647	12.4475	0.000811193	0.0138451
CEP55	2.26335	1.12959	15.9443	0.000180936	0.00478756
KIF11	1.63431	1.37813	14.1518	0.000386034	0.00823581
AIFM2	1.21405	2.92907	13.7339	0.000462174	0.00937886
ELOVL3	2.58749	1.29248	14.6743	0.000308798	0.00705831
MCM10	2.61076	1.90081	35.3215	1.54203e-07	4.73109e-05
IFIT1	3.72128	6.1962	36.3361	1.11366e-07	3.67966e-05
IFIT5	1.87723	4.14607	27.5955	2.0918e-06	0.000228431
CH25H	3.07381	1.34217	12.7957	0.00069572	0.0123998
IFIT3	3.06426	7.10918	39.4831	4.15157e-08	1.91061e-05
TWNK	1.21659	2.4613	10.5131	0.00193993	0.024726
IFIT2	1.75469	5.35631	17.457	9.70847e-05	0.00306626
CLEC1B	1.64895	4.53586	9.95491	0.00251081	0.0299023
BCL2L14	3.3732	2.94006	19.379	4.49394e-05	0.00171837
DENND5B	1.04657	2.77212	9.7425	0.00277196	0.0317224
RACGAP1	1.55382	1.86462	18.8769	5.48395e-05	0.00200756
TIMELESS	1.04616	4.12966	16.1546	0.000165784	0.00448801
BHLHE41	1.9985	1.22776	9.63398	0.00291621	0.0329634
IGF1	3.5503	1.5331	25.0585	5.20385e-06	0.000392145
FOXM1	1.96055	2.38739	23.5112	9.20903e-06	0.000567
SPATS2	1.40855	2.58471	21.4952	1.97277e-05	0.000965411
FKBP11	1.88752	4.03615	31.7389	5.01626e-07	8.73508e-05
LAG3	2.17224	5.54614	20.691	2.68954e-05	0.00121605
ABCB9	2.58193	3.63805	26.4422	3.15393e-06	0.000287179
ACVRL1	2.33078	3.50297	27.8331	1.92357e-06	0.000213682
METTL7B	4.43796	2.98552	34.3914	2.0849e-07	5.45684e-05
ITGA7	1.28073	3.19416	8.7035	0.00452808	0.0446775
ESPL1	2.16683	1.65367	11.6931	0.00113533	0.0172929
CIT	1.65554	1.16019	13.9721	0.000417037	0.00872392
RAD51AP1	2.08263	1.67546	23.5523	9.06898e-06	0.000561841
PARPBP	1.69092	2.34962	19.5197	4.2512e-05	0.00165209
CDCA3	2.19843	3.29939	34.3887	2.0867e-07	5.45684e-05
CD163	2.22484	6.69239	22.7284	1.23482e-05	0.000685858
OAS1	1.8177	7.197	23.5021	9.24026e-06	0.000567
OAS3	1.98402	7.3987	25.3798	4.62882e-06	0.000365932
OAS2	1.9234	7.40748	32.8036	3.51496e-07	7.30546e-05
OASL	1.48147	6.59344	26.3128	3.30392e-06	0.00029329
TROAP	1.84559	1.47603	15.1482	0.000252628	0.00616059
MYL6B	1.3217	3.22032	20.0617	3.4362e-05	0.00143944
TRAFD1	1.33257	5.09495	15.778	0.000193932	0.00502819
SKA3	2.63817	1.45708	21.8677	1.71098e-05	0.000857885
SPRY2	1.21441	1.24142	9.05205	0.00383585	0.0398616
GAS6	1.83684	2.51177	13.9247	0.000425649	0.00887526
EPSTI1	2.70423	7.08985	28.0875	1.75887e-06	0.000198814
BRCA2	1.44928	1.5532	11.7328	0.00111528	0.0171292
LRR1	1.72093	3.389	45.4552	6.96541e-09	8.09939e-06
LINC02284	2.07432	0.27998	9.05129	0.00383722	0.0398616
POLE2	2.29402	0.849587	19.9486	3.59177e-05	0.00147255
IGHG4	4.39409	7.98743	18.3859	6.83502e-05	0.00235276
IFI27	5.04423	10.131	79.8533	1.29749e-12	8.35975e-09
IFI27L1	1.86635	4.70659	40.5954	2.95237e-08	1.40904e-05
IGHGP	3.79782	4.99911	18.4661	6.6199e-05	0.00230828
IGHA1	2.61254	11.2323	28.5087	1.51754e-06	0.000181065
EFCAB11	2.27702	0.573249	17.3808	0.000100143	0.00312455
IGHA2	2.70523	7.06192	8.96801	0.00402202	0.0411453
SLC7A8	2.23565	2.59265	21.9771	1.64114e-05	0.000835881
CDKN3	1.45675	3.11597	11.506	0.00123494	0.0182493
RNASE1	4.24901	5.3442	44.3965	9.48359e-09	9.40043e-06
RNASE2	2.69846	8.28714	33.1675	3.11576e-07	6.92236e-05
ANG	1.1382	2.94284	8.55936	0.00485157	0.0467245
TGM1	2.25002	1.21615	8.7744	0.00437735	0.043726
GZMB	1.3099	7.15311	14.6711	0.000309219	0.00705831
CTSG	2.83323	1.0419	11.4379	0.00127346	0.0186053
DLGAP5	3.04121	1.11255	23.4576	9.395e-06	0.000573763
RNASE3	3.65157	4.75848	34.7595	1.8496e-07	5.29644e-05
IGHG1	2.41524	6.13966	14.1664	0.000383626	0.00819801
IGHG3	3.15857	7.60612	20.4446	2.95959e-05	0.00130161
IGHM	3.55193	13.0269	31.3988	5.62497e-07	9.11157e-05
ARHGAP11A	1.21676	2.66615	14.8853	0.000282337	0.00671253
THBS1	2.17955	6.97136	18.9542	5.31777e-05	0.00195785
FMN1	1.25536	1.63839	9.30598	0.00340194	0.0369936
THBS1-IT1	2.05836	0.780867	9.77365	0.00273194	0.0314039
CHAC1	2.17256	2.41385	13.7472	0.000459536	0.00935479
RAD51	2.26742	2.75701	32.1104	4.42862e-07	8.27061e-05
CCNB2	2.34828	3.33663	21.2732	2.14824e-05	0.00101773
TIPIN	1.1694	2.1066	14.1445	0.00038725	0.00824811
PML	1.22695	5.66063	25.785	3.99632e-06	0.000323878
SCAMP5	1.39019	2.37812	12.5433	0.000777581	0.0133956
TNFAIP8L3	2.55549	0.233942	13.1019	0.000608332	0.0112629
ABHD17C	1.15232	3.36807	17.6875	8.84146e-05	0.00286259
TICRR	2.6951	0.935059	17.5776	9.24446e-05	0.00294862
CYP19A1	5.48175	1.63253	44.0721	1.04309e-08	9.60091e-06
RCCD1	1.05844	4.07742	14.9316	0.000276857	0.00659442
WDR76	1.11092	2.41527	14.8739	0.000283704	0.00673261
BUB1B	3.29452	1.22262	26.6098	2.97016e-06	0.00027619
KNL1	1.48387	1.09007	12.1917	0.000908648	0.0150499
FANCI	1.32318	3.71253	20.1068	3.37616e-05	0.00143109
PCLAF	2.24062	4.86099	32.1235	4.40916e-07	8.27061e-05
KIF23	1.6071	1.33481	10.3395	0.00210129	0.0261868
OIP5	2.58316	2.10385	24.5188	6.34183e-06	0.00044063
ISG20	1.97712	9.07326	31.0649	6.29737e-07	9.66047e-05
PPIB	1.04333	3.4991	16.2581	0.000158817	0.00435429
TNFRSF17	2.83313	4.09588	30.9154	6.62477e-07	9.81228e-05
MIR193BHG	2.8153	0.606829	18.7794	5.70099e-05	0.00204687
ORC6	1.6627	2.54607	14.8099	0.000291514	0.0068299
GPT2	1.77475	3.55918	28.3795	1.58767e-06	0.000185989
SHCBP1	1.90834	3.31276	13.2802	0.00056279	0.010618
GINS2	2.05018	3.9469	31.8198	4.88167e-07	8.61715e-05
CDT1	1.90969	4.33088	24.3509	6.74606e-06	0.000457525
NQO1	1.27734	2.60166	17.4293	9.81856e-05	0.0030859
PKMYT1	2.30191	3.40147	22.6814	1.25687e-05	0.000689281
MT2A	1.91793	9.69376	38.1023	6.37444e-08	2.41591e-05
MT1E	2.01714	4.84228	25.9264	3.79717e-06	0.000313656
MT1M	4.99674	2.13759	31.3454	5.72743e-07	9.11157e-05
MT1F	1.26052	5.29001	26.2475	3.38233e-06	0.000296016
MT1X	1.14103	2.14263	10.8681	0.00164902	0.0222041
IL27	1.5794	2.27507	9.90164	0.00257378	0.0304272
MT1H	3.60736	1.76871	15.3117	0.000235809	0.00584512
GINS3	1.37092	2.06006	13.4273	0.000527871	0.0101676
RMI2	1.77623	2.96293	17.8912	8.14186e-05	0.00272509
AARS1	1.1778	5.14067	15.8296	0.000189796	0.00496086
PLK1	2.15501	4.59557	30.3743	7.96527e-07	0.000114045
CCNF	1.18759	2.76924	10.794	0.0017057	0.0227724
TEDC2	2.45519	0.868387	23.1903	1.03818e-05	0.000607297
DCTPP1	1.01092	5.36339	26.5964	2.9844e-06	0.00027619
TMEM186	1.00408	3.28278	13.5026	0.000510886	0.00995958
MT1G	3.58128	3.3166	25.6761	4.15699e-06	0.000332714
PIMREG	2.95015	0.34317	14.4473	0.000340175	0.00762347
SHMT1	1.66942	2.71659	19.801	3.80585e-05	0.00151834
HASPIN	3.82593	0.415143	32.1976	4.30133e-07	8.27061e-05
ARHGAP23	1.49408	1.11437	11.0277	0.00153341	0.0211724
CDC6	1.97519	2.86197	24.8823	5.54999e-06	0.000406348
CNP	1.30866	6.69845	30.0626	8.86187e-07	0.000125488
XAF1	2.07535	4.49257	24.5969	6.16228e-06	0.000435292
DHX58	1.56981	4.6596	20.2365	3.20946e-05	0.00138318
BRCA1	1.26063	3.66748	9.00505	0.00392234	0.0404023
TOP2A	1.63991	4.79785	25.4263	4.55124e-06	0.00036202
MPO	4.45079	7.64647	38.2398	6.10618e-08	2.38437e-05
LGALS3BP	1.83917	5.68521	18.7977	5.65956e-05	0.00204283
TNFRSF13B	1.90814	3.49797	12.2014	0.000904767	0.0150243
IFI35	1.68323	6.44086	21.9912	1.63238e-05	0.000835881
ALOX15B	3.2203	1.92351	11.4827	0.00124797	0.0183577
AURKB	2.39452	5.7149	40.9006	2.6906e-08	1.39429e-05
KIF18B	2.60617	0.905048	18.4135	6.59869e-05	0.00230828
NME1	1.44706	4.53845	37.799	7.01009e-08	2.50922e-05
GP1BA	2.18816	3.61491	8.63969	0.00466841	0.0456764
PSMC3IP	1.38954	2.09168	11.7972	0.00108356	0.0168386
PLEKHH3	1.78829	2.07205	16.5982	0.00013799	0.00395142
TK1	2.28888	3.8542	41.6274	2.15947e-08	1.39135e-05
BIRC5	2.67895	4.46053	42.9389	1.45823e-08	1.24223e-05
PRR29	1.71372	1.65982	13.0697	0.000616943	0.0113896
PYCR1	2.20661	3.30967	19.0962	5.02631e-05	0.00186654
TUBG1	1.01803	4.44301	16.5175	0.000142664	0.00402648
CCR10	1.40995	2.75324	9.38981	0.00327025	0.0360175
SLFN5	1.0332	4.36816	9.6938	0.00283575	0.0322699
FAM20A	2.34956	3.47497	22.1319	1.54732e-05	0.000800756
NDC80	1.02689	2.70926	11.1744	0.00143456	0.020159
SKA1	2.03709	3.7402	23.6738	8.66809e-06	0.000550232
SEC11C	1.26177	5.76595	8.4667	0.00507226	0.0480597
TYMS	1.84853	5.2633	26.9429	2.63698e-06	0.000261386
LMAN1	1.06517	5.02274	14.6886	0.000306928	0.00705831
SERPINB2	2.71	4.55066	14.9437	0.000275441	0.00658684
GINS1	1.62394	1.75478	11.6864	0.00113874	0.0173244
RIPOR3	1.49673	1.158	8.36207	0.00533416	0.0496971
ZBP1	1.51084	2.89876	12.8992	0.000664801	0.0119981
FER1L4	3.49376	2.30784	26.3938	3.2092e-06	0.000287179
MYBL2	2.52813	5.88338	27.1621	2.43915e-06	0.000254622
HELZ2	1.85101	8.53778	32.5198	3.86286e-07	7.7422e-05
DSN1	1.01654	3.4524	12.7574	0.000707547	0.0125583
TPX2	2.18102	4.66739	27.1435	2.45527e-06	0.000254622
PLTP	1.70717	2.06751	11.581	0.00119396	0.0178277
SLC4A11	1.732	1.36187	16.9463	0.000119596	0.0034946
E2F1	1.53946	3.80277	16.9604	0.000118908	0.0034946
UBE2C	2.26415	4.38251	40.7539	2.81325e-08	1.39429e-05
SLCO4A1	2.35171	4.47835	32.6689	3.67583e-07	7.51853e-05
SIGLEC1	1.95124	7.53719	16.0832	0.000170777	0.00457513
AURKA	2.09096	3.50285	33.9274	2.42629e-07	5.85696e-05
AZU1	3.3009	0.26729	21.0183	2.36976e-05	0.00111448
PRTN3	4.91897	2.47087	23.8882	8.00469e-06	0.000515742
MYDGF	1.06752	7.39113	16.224	0.00016108	0.00440234
UHRF1	2.19929	0.853014	13.7822	0.000452625	0.00928746
ZNF93	1.6203	0.551704	11.0337	0.00152921	0.0211659
ZNF576	1.11697	2.42958	16.1065	0.000169131	0.00454993
TNNT1	1.6635	5.59428	17.1168	0.000111533	0.00335798
ELANE	3.01804	2.07384	12.9908	0.000638649	0.0117064
ZBTB32	1.36613	3.62693	11.5511	0.00121011	0.0180064
LINC01480	1.47594	2.98961	12.1642	0.000919854	0.0151965
LILRB4	1.03781	6.10148	14.0339	0.000406105	0.00855078
CD70	1.55711	4.51512	15.478	0.000219887	0.00555582
SPC24	1.94131	1.87232	25.0194	5.27858e-06	0.000393232
AXL	2.15588	2.03044	12.5128	0.000788127	0.0135051
ZNF175	1.42305	1.43116	9.82252	0.00267039	0.0310074
FPR2	2.5525	3.26553	31.9917	4.60819e-07	8.48301e-05
GDF15	2.78763	1.95908	17.0423	0.000114981	0.00341394
LRG1	1.38277	4.26799	11.8494	0.00105852	0.0165535
RETN	1.65159	5.41544	10.7198	0.00176457	0.0233452
ASF1B	1.92545	5.01986	28.3265	1.61741e-06	0.000187546
BST2	1.33846	6.97692	20.9588	2.42484e-05	0.00112803
RASIP1	2.59223	1.31011	12.4232	0.000819968	0.0139579
LILRA6	1.13371	5.03663	9.01007	0.003913	0.0403424
BCL2L12	1.12931	4.92312	31.3544	5.70993e-07	9.11157e-05
APOC1	2.03565	0.418895	11.6059	0.00118068	0.017691
VSIG10L	1.37578	1.65106	12.6221	0.000750978	0.0130419
IGLC2	3.21081	8.90107	31.5583	5.33051e-07	8.92064e-05
IGLL5	1.99206	4.0724	19.8837	3.68435e-05	0.00149297
IGLC3	3.53073	8.01492	31.245	5.92495e-07	9.31084e-05
IGLC7	3.22512	3.57132	27.3468	2.2843e-06	0.000247357
RTCB	1.12233	6.33227	35.1063	1.65301e-07	4.84108e-05
SSTR3	2.33542	3.44546	17.4303	9.81474e-05	0.0030859
CDC45	2.76136	2.56239	29.4517	1.09356e-06	0.000143792
TCN2	1.2394	4.96544	12.1016	0.000945828	0.0153566
DERL3	1.65908	4.10026	22.2717	1.46738e-05	0.000778986
KLHDC7B	1.42796	5.15517	24.1544	7.25337e-06	0.000479318
H1-0	1.53535	6.454	17.2566	0.000105345	0.00320916
IGLV6-57	2.75461	1.27918	16.0083	0.000176181	0.00468932
CHAF1B	1.29347	2.44042	18.6516	5.99918e-05	0.00212963
MX1	2.65581	9.58682	41.0015	2.60941e-08	1.39429e-05
MX2	1.75069	8.20657	26.9661	2.61529e-06	0.000261245
IFFO2	-1.20691	4.95556	32.3916	4.03142e-07	7.87104e-05
PDE4B	-1.15225	5.49918	16.2696	0.000158067	0.00434296
HIPK1-AS1	-1.14026	2.59645	10.6788	0.00179799	0.0236176
LINC01353	-1.08742	1.99612	15.6882	0.000201351	0.00515826
NLRP3	-1.19083	6.67865	13.705	0.000467984	0.00942256
NBL1	-1.21243	4.96033	12.2595	0.000881701	0.0147626
TNFRSF8	-1.12797	2.13935	8.79793	0.00432849	0.0433387
BTBD19	-1.56368	2.17163	20.3803	3.03447e-05	0.00133
RNU1-2	-2.28218	0.837821	17.8772	8.18804e-05	0.00273345
FCGR2C	-1.39054	2.41838	11.3317	0.001336	0.0193001
CD1C	-1.71207	3.82041	18.134	7.38274e-05	0.00250352
MIR9-1HG	-1.06968	1.98736	9.2244	0.00353544	0.0379331
WDR47	-1.02657	2.08758	19.9761	3.55325e-05	0.00146285
PTGS2	-1.35193	6.26804	10.7598	0.00173258	0.0229831
SUSD4	-1.2689	1.5315	12.0896	0.000950887	0.0153934
LMNA	-1.32272	6.74174	17.7469	8.63114e-05	0.00282272
RNU1-1	-1.70959	1.60471	10.2174	0.00222316	0.0273878
FCER1A	-2.01104	1.69978	10.5182	0.00193546	0.0246935
YPEL5	-1.26722	9.59732	51.4331	1.29323e-09	2.08307e-06
ZDBF2	-1.09691	1.47308	12.0194	0.000981136	0.015725
EPHA4	-1.60291	1.84675	17.9563	7.93065e-05	0.00266131
NR4A2	-1.23353	8.08042	23.1816	1.04154e-05	0.000607297
UICLM	-5.00627	1.87306	80.8184	1.05342e-12	8.35975e-09
CYP27A1	-1.55136	2.90332	10.5239	0.00193039	0.0246775
ASTL	-2.56022	2.22351	34.5919	1.95314e-07	5.35492e-05
CSRNP1	-1.06983	7.89588	30.983	6.47462e-07	9.70139e-05
CACNA2D3	-1.5562	0.451208	9.08869	0.00376982	0.0395148
ST3GAL6	-1.10506	2.81804	10.0745	0.0023752	0.0286581
LINC00877	-1.52167	3.64745	27.3102	2.31421e-06	0.000248507
NECTIN3	-1.25413	1.95457	12.9457	0.000651374	0.0118331
MBNL1-AS1	-1.02942	1.2196	8.46309	0.00508105	0.0481076
EPHB3	-1.76313	1.22067	12.5608	0.000771588	0.0133459
ALS2CL	-1.69211	1.53405	22.1567	1.53283e-05	0.000797614
FAM43A	-1.07722	2.67325	11.8949	0.00103723	0.0163996
CDS1	-1.52374	0.568877	10.4749	0.00197434	0.0249809
LINC02432	-1.58193	0.543684	8.55338	0.00486551	0.0468237
SH3RF1	-1.12782	2.27083	15.6925	0.000200989	0.00515826
NAF1	-1.16242	7.12431	23.9	7.96976e-06	0.000515742
CCDC149	-1.04379	3.17747	10.0828	0.00236611	0.0285888
RASGEF1B	-1.16532	6.38045	18.1553	7.31966e-05	0.00249527
RPS3AP21	-1.38993	0.504551	9.87912	0.0026009	0.0305238
MTND4P12	-1.36219	3.53872	13.654	0.000478426	0.00957299
CSF1R	-1.157	6.62079	9.66968	0.00286791	0.0325316
TPPP	-1.61961	2.1581	14.1878	0.000380122	0.00819801
RPL10P8	-1.22564	0.28267	10.3876	0.00205523	0.0257657
EGR1	-1.38095	7.69045	33.0471	3.24234e-07	6.94946e-05
NEDD9	-1.11597	5.49124	21.3632	2.07523e-05	0.000991319
CD83	-1.38539	7.74947	29.056	1.25413e-06	0.000158439
HLA-DRB1	-1.03093	10.3931	10.042	0.00241126	0.0289576
ZC3H12D	-1.05516	4.17139	25.9274	3.79588e-06	0.000313656
TNFAIP3	-1.14686	8.42608	28.7952	1.37319e-06	0.000168819
ATXN1-AS1	-1.45519	0.290729	10.1038	0.00234321	0.0284319
GABBR1	-1.02368	6.26256	11.6415	0.00116193	0.0175187
H3C1	-1.0964	1.98291	8.72595	0.00447977	0.0444049
H4C1	-1.20061	0.6165	9.94622	0.00252096	0.0299678
HLA-DMB	-1.22568	6.24542	26.7568	2.81809e-06	0.000268992
HLA-DMA	-1.00975	4.9928	19.9354	3.61039e-05	0.00147255
VEGFA	-1.68065	4.32681	18.3089	6.88151e-05	0.00235838
HLA-DRA	-1.1381	11.4238	19.6845	3.98407e-05	0.00156521
IER3-AS1	-1.8029	1.43126	19.9891	3.53524e-05	0.0014601
IER3	-1.45714	10.7709	14.1072	0.000393505	0.00832628
ZNF165	-1.95028	0.897763	23.931	7.87869e-06	0.000512752
HLA-DPA1	-1.01292	8.39123	23.7996	8.27217e-06	0.000530324
HLA-DPB1	-1.23616	8.23656	40.8328	2.74655e-08	1.39429e-05
RPL32P1	-1.69635	1.4902	16.7311	0.000130646	0.00376623
WDR86-AS1	-1.27653	1.97851	9.88774	0.00259048	0.0305127
INSIG1-DT	-1.15523	4.76508	27.6325	2.06461e-06	0.00022739
CHN2	-1.49001	0.2902	9.25614	0.00348287	0.0375881
EOLA1	-1.26626	1.90652	10.8849	0.00163644	0.0221272
IL13RA1	-1.02038	5.34501	11.4037	0.00129326	0.0188305
ZNF703	-2.08602	5.72306	33.0033	3.28975e-07	6.94946e-05
LINC00861	-1.06072	5.4584	14.124	0.000390684	0.00829383
LYNX1	-2.35575	1.78985	27.1987	2.40764e-06	0.000254622
GADD45G	-1.56108	6.27118	38.8355	5.07228e-08	2.17872e-05
NR4A3	-1.6533	5.88246	23.1306	1.06164e-05	0.000613341
TRAF1	-1.17201	4.12693	33.8717	2.47102e-07	5.85696e-05
NRARP	-2.35793	3.74922	72.5619	6.57972e-12	2.82621e-08
SLC46A2	-1.38629	2.35378	9.45325	0.00317413	0.0351693
NALT1	-1.24408	1.17246	8.63429	0.0046805	0.0456916
NOXA1	-1.33687	2.32396	19.7692	3.85358e-05	0.00152323
LINC01451	-1.59181	1.16723	11.5337	0.00121966	0.0180857
PGAM1P8	-1.66979	0.499622	12.7636	0.000705627	0.0125417
SORL1	-1.04436	7.67456	15.9169	0.000183015	0.00483265
LINC02762	-1.70794	0.837395	18.7713	5.71946e-05	0.00204725
NRIP3	-1.45849	4.14459	16.1302	0.000167473	0.00451475
CDKN1C	-1.77313	4.48562	31.658	5.15464e-07	8.85635e-05
GATA3	-1.06376	6.20268	27.0632	2.52639e-06	0.000258374
JMJD1C	-1.03049	6.10015	34.2924	2.15327e-07	5.45684e-05
RRP12	-1.00325	6.58559	12.2887	0.00087034	0.0146413
GOLGA7B	-1.19355	2.24926	14.4139	0.000345056	0.00767382
NEURL1	-1.59168	2.94717	12.6748	0.000733761	0.0128468
RNU2-59P	-1.52369	1.52924	16.7101	0.000131777	0.00379035
PLAU	-1.85054	1.81908	9.21827	0.00354569	0.0379962
LIPN	-1.90639	3.0808	15.6244	0.000206796	0.00528724
CAMK1D	-1.06117	4.89504	25.3152	4.73897e-06	0.000372356
SFTPD	-1.6514	0.647709	9.94371	0.0025239	0.0299751
VENTX	-1.26342	2.76602	11.6714	0.00114645	0.0173981
KLRB1	-1.36825	4.93774	19.8614	3.71668e-05	0.00150135
OLR1	-1.52973	3.99031	10.3497	0.00209145	0.0261147
LINC00937	-1.28261	3.03842	9.36985	0.00330111	0.0362574
KRT1	-1.78626	3.0316	10.6512	0.00182085	0.0237484
HAL	-1.2406	1.99491	9.71936	0.00280207	0.0319819
ATP2B1-AS1	-1.02857	5.97634	11.2508	0.00138582	0.0197111
ZNF10	-1.31284	2.56045	24.3823	6.66859e-06	0.000456746
RPH3A	-1.58702	2.20672	10.7922	0.00170713	0.0227724
RNU4-2	-1.1355	3.67074	10.4628	0.00198536	0.0250326
FAM222A	-1.2091	0.450993	8.6063	0.00474366	0.0460204
WNT1	-1.23441	2.14914	13.1695	0.000590631	0.0109984
DDN-AS1	-1.34068	3.98316	14.3072	0.000361159	0.00794181
NELL2	-1.14274	4.28282	19.1386	4.94241e-05	0.00185139
TAMALIN	-1.19131	8.59798	16.9596	0.000118944	0.0034946
HRK	-1.30619	1.44158	9.87097	0.00261078	0.0305841
IL23A	-1.21736	4.15303	17.2979	0.000103583	0.00319158
ST8SIA1	-1.25792	0.490238	8.49561	0.00500228	0.0475432
LINC00544	-1.9531	0.945965	26.1563	3.49519e-06	0.000300261
HSPH1	-1.21082	6.43829	29.1341	1.22063e-06	0.000155733
RGCC	-1.66683	5.2398	13.252	0.000569748	0.0107179
RTN1	-1.38755	3.2021	9.05306	0.00383401	0.0398616
TMEM63C	-1.63262	1.58296	17.8427	8.30295e-05	0.00274545
VASH1	-1.4575	5.44989	18.7435	5.7831e-05	0.00206429
CRIP2	-1.21083	4.02542	9.47973	0.0031349	0.0349449
MEG3	-2.94746	0.943569	27.1268	2.46995e-06	0.000254622
NEIL1	-1.03346	4.07706	17.2884	0.000103986	0.00319158
RPS3AP47	-1.04082	6.91847	22.2626	1.47244e-05	0.000778986
RNU5A-1	-1.19711	2.22358	11.288	0.00136266	0.0195103
LTK	-1.15493	2.56978	10.0004	0.0024583	0.0294129
SYT17	-2.15878	0.401949	16.3377	0.000153666	0.00424012
DPEP2	-1.28461	4.07108	21.42	2.03046e-05	0.000979946
LINC02132	-1.19075	0.531124	9.08759	0.00377179	0.0395148
LAT	-1.38137	1.07936	8.42603	0.00517241	0.0487576
ZNF469	-1.16012	1.74724	12.1383	0.000930509	0.0152697
SPATA2L	-1.04198	1.5461	10.1512	0.00229226	0.0280514
TPPP3	-2.06219	3.58914	24.5517	6.26557e-06	0.000438794
ZDHHC1	-1.9238	1.0307	23.1192	1.06618e-05	0.000613341
BAIAP3	-1.16887	2.4824	10.4866	0.00196375	0.024941
CIITA	-1.24477	6.64506	23.6379	8.78441e-06	0.000554882
RRAD	-2.20169	2.59806	24.1608	7.23622e-06	0.000479318
DNASE1	-1.07336	3.93005	9.56824	0.0030074	0.0336985
CCL4L2	-1.13533	6.52719	11.8763	0.00104585	0.0164046
NOG	-1.57437	0.649334	13.9771	0.00041615	0.00871952
TMEM88	-1.62348	2.18977	17.549	9.35226e-05	0.00297563
MYO15B	-1.15649	5.53025	19.5165	4.25651e-05	0.00165209
PLXDC1	-1.33869	3.21188	25.0656	5.19039e-06	0.000392145
VMO1	-2.25895	0.999279	13.5584	0.000498662	0.0098282
KDM6B	-1.41192	5.32709	25.0077	5.30124e-06	0.000393232
MTRNR2L1	-1.78412	3.94313	9.19999	0.00357644	0.0381823
BAIAP2	-1.19167	2.37376	22.7657	1.21757e-05	0.000679203
SMAD7	-1.17619	4.83631	20.4918	2.90569e-05	0.00129484
PELATON	-1.23303	5.09087	19.7823	3.83385e-05	0.00152323
PLCB1	-1.28736	1.73824	9.80443	0.002693	0.0311788
SNAI1	-1.61716	3.75076	11.7807	0.00109161	0.0168563
CFD	-1.0873	7.00105	9.88105	0.00259856	0.0305238
MATK	-1.47533	3.43827	13.4053	0.000532945	0.01025
KISS1R	-1.09849	2.84087	9.23518	0.00351749	0.0377719
ADAMTS10	-1.63596	2.09057	22.3232	1.43902e-05	0.000772635
ADGRE3	-2.48768	0.70708	23.7401	8.4571e-06	0.000539496
SIGLEC17P	-1.49948	0.787031	8.69069	0.00455589	0.0448832
LYPD3	-1.82704	4.37463	63.4223	5.75963e-11	1.85546e-07
FOSB	-1.1247	11.3459	28.5301	1.50624e-06	0.000181065
TNFSF14	-1.21907	1.59264	9.24427	0.00350244	0.0376731
IZUMO4	-1.09664	3.00082	10.6014	0.0018629	0.0241502
ICAM1	-1.06908	4.85608	12.8506	0.000679153	0.0121888
IQCN	-1.31057	1.71815	11.7662	0.0010987	0.0169151
CA11	-1.02242	2.61649	16.2214	0.000161253	0.00440234
DNAJB1	-1.13992	9.23459	19.9949	3.52722e-05	0.0014601
FCER2	-1.65857	1.07831	13.7953	0.000450088	0.00925014
MIR23AHG	-1.13192	8.6975	14.6872	0.000307116	0.00705831
ZNF331	-1.3962	6.64286	35.1811	1.61353e-07	4.83534e-05
MYADM	-1.0022	8.3695	16.9474	0.000119542	0.0034946
CPAMD8	-1.43878	2.14752	17.8114	8.40896e-05	0.00276423
TMEM191A	-1.21108	1.31954	11.4636	0.00125879	0.0184537
LGALS2	-2.08179	5.4158	22.6811	1.25703e-05	0.000689281
CYP2D7	-1.41627	0.887476	9.56177	0.00301652	0.0337714
SREBF2-AS1	-1.289	1.73963	13.6422	0.000480891	0.00959697
SEC14L2	-1.34955	2.76788	12.4592	0.000807019	0.0137921
AATBC	-1.35583	1.02185	9.6666	0.00287204	0.0325497
ITGB2-AS1	-1.26655	6.68689	22.6101	1.29113e-05	0.00070498
OLIG1	-1.90871	3.29739	15.7938	0.000192654	0.00501522
MT-TH	-1.23151	1.37746	10.6127	0.00185326	0.0240495
MT-TS2	-1.34231	2.17934	14.7832	0.000294836	0.00688512
