# Supplementary material for: Network Medicine Approach to Viral Infections: Unraveling Universal and Virus-Specific Immune Pathways
Source: Research Square preprint supplement (doi:10.21203/rs.3.rs-5240411/v1), 2025-10-31
Supplement: Supplementary file 2 [file b6eaf2300a6146d7e75cc048.xlsx]

## Sheet: CHIKV
Id	numberofpairsincombinededgelist	Degree	modularity_class	Eccentricity	closnesscentrality	harmonicclosnesscentrality	betweenesscentrality	modules
A2M-AS1	232	232	9	2	0.853659	0.914286	20.4397
ABCA1	261	261	8	2	0.919614	0.956294	21.817
ABCA13	248	248	8	2	0.882716	0.933566	19.1226
ABCC13	38	38	25	2	0.88	0.931818	2.43619
ABCC4	34	34	25	2	0.814815	0.886364	2.04412
ABCC5	207	207	9	2	0.793201	0.869643	17.9674
ABCD2	228	228	9	2	0.843373	0.907143	23.5129
ABCG2	36	36	25	2	0.846154	0.909091	2.35499
ABLIM1	257	257	9	2	0.924092	0.958929	31.9937
ACOT9	244	244	8	2	0.871951	0.926573	14.9915
ACSL1	272	272	8	2	0.953333	0.975524	31.5398
ACSS3	54	54	26	2	0.909091	0.95	3.50414
ACVR1B	45	45	11	2	0.816901	0.887931	7.87631
ACVR1C	244	244	9	2	0.886076	0.935714	30.0127
ACVR2B	232	232	9	2	0.853659	0.914286	23.3154
ADAM9	91	91	30	2	0.902655	0.946078	6.77829
ADAMTS5	271	271	9	2	0.968858	0.983929	37.9662
ADAMTSL4-AS1	115	115	12	2	0.836257	0.902098	19.6233
ADAMTSL4-AS2	124	124	12	2	0.882716	0.933566	27.7035
ADAP2	49	49	11	2	0.865672	0.922414	9.25833
ADGRE1	97	97	12	2	0.756614	0.839161	7.86232
ADGRE3	244	244	9	2	0.886076	0.935714	26.1557
ADGRE4P	240	240	9	2	0.875	0.928571	25.9296
ADGRG3	93	93	12	2	0.740933	0.825175	9.90082
ADM	179	179	8	2	0.727735	0.812937	9.51745
ADORA3	269	269	9	2	0.962199	0.980357	36.8914
ADTRP	229	229	9	2	0.845921	0.908929	23.4006
AFF2	231	231	8	2	0.83871	0.903846	14.0268
AFF3	226	226	9	2	0.838323	0.903571	17.3546
AGL	214	214	9	2	0.809249	0.882143	21.3901
AGMAT	250	250	9	2	0.903226	0.946429	33.1454
AHR	26	26	15	1	1	1	5.20844
AHSP	39	39	25	2	0.897959	0.943182	3.07287
AIF1	128	128	12	2	0.905063	0.947552	33.7776
AIM2	213	213	8	2	0.796657	0.872378	8.80314
AK5	233	233	9	2	0.856269	0.916071	23.4175
AKAP12	202	202	9	2	0.782123	0.860714	20.3052
AKAP7	32	32	18	2	0.970588	0.984848	1.31666
AKIRIN2	241	241	8	2	0.864048	0.921329	13.6828
AKR1E2	1	1	2	1	1	1	0
ALAS2	18	18	28	1	1	1	9.27379
ALDH1A1	246	246	9	2	0.89172	0.939286	26.1515
ALDH5A1	175	175	9	2	0.727273	0.8125	15.8948
ALMS1P1	255	255	8	2	0.902208	0.945804	21.7554
ALOX15	262	262	9	2	0.939597	0.967857	36.9583
ALOX5AP	125	125	12	2	0.888199	0.937063	26.6105
ALPL	14	14	24	2	0.666667	0.75	1.85522
AMIGO1	260	260	9	2	0.933333	0.964286	35.3473
ANK1	32	32	25	2	0.785714	0.863636	2.169
ANKDD1A	82	82	30	2	0.836066	0.901961	5.70704
ANKRD22	241	241	8	2	0.864048	0.921329	12.6116
ANKRD34B	52	52	26	2	0.882353	0.933333	3.83406
ANKRD36BP2	33	33	18	1	1	1	1.41666
ANKUB1	261	261	9	2	0.936455	0.966071	36.0234
ANOS2P	57	57	11	2	0.983051	0.991379	17.5995
ANP32B	8	8	1	1	1	1	0.5
ANXA1	263	263	8	2	0.925566	0.95979	29.9354
ANXA3	239	239	8	2	0.858859	0.917832	15.3042
APMAP	18	18	20	2	0.846154	0.909091	1.20464
APOBEC3A	140	140	8	2	0.662037	0.744755	8.52688
APOL1	109	109	12	2	0.80791	0.881119	10.6351
APOL4	273	273	8	2	0.956522	0.977273	30.5009
APOL6	272	272	8	2	0.953333	0.975524	30.8408
AQP9	271	271	8	2	0.950166	0.973776	30.9521
AREG	78	78	30	2	0.809524	0.882353	8.86083
ARG1	225	225	8	2	0.824207	0.893357	17.7968
ARHGAP25	18	18	20	2	0.846154	0.909091	1.26644
ARHGAP26	88	88	30	2	0.87931	0.931373	7.83109
ARL10	236	236	9	2	0.864198	0.921429	28.6249
ARL11	13	13	24	2	0.651163	0.732143	1.10132
ARL17B	249	249	9	2	0.900322	0.944643	31.75
ARL5B	88	88	30	2	0.87931	0.931373	7.83109
ARPIN	228	228	9	2	0.843373	0.907143	29.8518
ARRDC4	21	21	15	2	0.83871	0.903846	3.87274
ASCC2	12	12	28	2	0.75	0.833333	1.6802
ATF3	87	87	30	2	0.871795	0.926471	6.58125
ATM	280	280	9	1	1	1	38.6862
ATP8B2	24	24	4	2	0.8	0.875	1.50514
AURKA	30	30	18	2	0.916667	0.954545	0.936108
AXL	284	284	8	2	0.993056	0.996503	31.9054
B3GALT2	244	244	9	2	0.886076	0.935714	31.0199
B3GNT5	215	215	8	2	0.80112	0.875874	12.8415
B4GALT5	128	128	12	2	0.905063	0.947552	33.878
BACH2	230	230	9	2	0.848485	0.910714	18.9191
BAG1	42	42	25	2	0.956522	0.977273	4.62871
BASP1	201	201	8	2	0.770889	0.851399	11.6889
BATF2	127	127	12	2	0.899371	0.944056	27.3279
BBOF1	36	36	25	2	0.846154	0.909091	2.01183
BCL11B	243	243	9	2	0.883281	0.933929	29.8689
BCL2	257	257	9	2	0.924092	0.958929	31.9867
BCL2A1	253	253	8	2	0.896552	0.942308	27.6656
BCL2L1	35	35	25	2	0.830189	0.897727	3.34579
BCL2L14	125	125	12	2	0.888199	0.937063	27.3454
BCORP1	15	15	15	2	0.702703	0.788462	1.59305
BEND2	6	6	21	2	0.875	0.928571	0
BISPR	252	252	8	2	0.89375	0.940559	22.4114
BLVRA	237	237	8	2	0.853731	0.914336	17.0224
BLVRB	9	9	28	2	0.666667	0.75	0.076923
BLZF1	233	233	8	2	0.843658	0.907343	13.3045
BMS1P1	8	8	1	1	1	1	0.5
BMX	59	59	5	2	0.915493	0.953846	3.83238
BPGM	42	42	25	2	0.956522	0.977273	4.62871
BRCA2	242	242	8	2	0.866667	0.923077	13.5534
BRI3	103	103	12	2	0.781421	0.86014	10.5675
BRI3BP	238	238	9	2	0.869565	0.925	21.043
BSG	19	19	25	2	0.637681	0.715909	0.66831
BST1	21	21	24	2	0.8	0.875	6.18619
BST2	99	99	12	2	0.764706	0.846154	9.18735
BTLA	196	196	9	2	0.769231	0.85	19.9728
BTN3A1	21	21	20	2	0.956522	0.977273	1.31644
BTN3A2	21	21	20	2	0.956522	0.977273	1.30991
BTN3A3	21	21	20	2	0.956522	0.977273	1.30991
BTNL3	21	21	20	2	0.956522	0.977273	1.42617
BTNL8	18	18	24	2	0.736842	0.821429	1.71459
BUD31	40	40	11	2	0.763158	0.844828	4.25608
C15orf48	45	45	30	2	0.641509	0.720588	3.65006
C15orf54	19	19	13	2	0.88	0.931818	1.57961
C18orf25	244	244	8	2	0.871951	0.926573	15.8541
C1GALT1C1	59	59	5	2	0.915493	0.953846	3.51485
C1RL	18	18	24	2	0.736842	0.821429	1.40371
C2orf27A	223	223	9	2	0.830861	0.898214	26.1682
C3AR1	250	250	8	2	0.888199	0.937063	17.2505
C4BPA	243	243	9	2	0.883281	0.933929	28.0432
C5AR1	110	110	12	2	0.8125	0.884615	10.669
C5AR2	21	21	24	2	0.8	0.875	3.29807
C9orf72	260	260	8	2	0.916667	0.954545	21.2972
CA1	35	35	25	2	0.830189	0.897727	2.47456
CACNA1E	101	101	12	2	0.772973	0.853147	15.5685
CACNA2D3	242	242	9	2	0.880503	0.932143	30.8468
CALCOCO2	251	251	8	2	0.890966	0.938811	18.2267
CALD1	5	5	22	2	0.857143	0.916667	0.2
CALR	3	3	6	1	1	1	0
CAMK4	256	256	9	2	0.921053	0.957143	32.6396
CAMP	114	114	12	2	0.831395	0.898601	16.1315
CAPG	99	99	12	2	0.764706	0.846154	14.016
CARD16	250	250	8	2	0.888199	0.937063	18.481
CARD17	196	196	8	2	0.760638	0.842657	9.82558
CARD8-AS1	54	54	26	2	0.909091	0.95	3.33295
CASC20	102	102	30	1	1	1	13.9435
CASP1	59	59	5	2	0.915493	0.953846	3.40591
CASP5	215	215	8	2	0.80112	0.875874	8.99092
CASS4	223	223	9	2	0.830861	0.898214	19.075
CAT	274	274	9	2	0.979021	0.989286	38.17
CBR1	56	56	5	2	0.878378	0.930769	3.87361
CCDC141	227	227	9	2	0.840841	0.905357	17.9786
CCDC144A	77	77	30	2	0.80315	0.877451	5.75256
CCDC65	221	221	9	2	0.825959	0.894643	23.0363
CCDC7	32	32	18	2	0.970588	0.984848	1.31666
CCL2	257	257	8	2	0.907937	0.949301	21.3487
CCL3L1	51	51	11	2	0.892308	0.939655	17.4241
CCL4L2	17	17	15	2	0.742857	0.826923	1.78266
CCL8	233	233	8	2	0.843658	0.907343	22.4182
CCN3	224	224	9	2	0.833333	0.9	20.9097
CCNA1	263	263	8	2	0.925566	0.95979	28.8926
CCNB1	33	33	18	1	1	1	1.41666
CCNJL	97	97	12	2	0.756614	0.839161	11.3887
CCR1	245	245	8	2	0.874618	0.928322	17.1883
CCR2	21	21	20	2	0.956522	0.977273	1.31644
CCR3	55	55	26	2	0.923077	0.958333	3.43992
CCR7	21	21	4	2	0.744186	0.828125	1.6831
CCRL2	257	257	8	2	0.907937	0.949301	20.7236
CD101	6	6	7	2	0.714286	0.8	0.616667
CD14	81	81	12	2	0.697561	0.783217	11.126
CD160	228	228	9	2	0.843373	0.907143	19.91
CD163	112	112	12	2	0.821839	0.891608	17.5131
CD177	117	117	12	2	0.846154	0.909091	14.4417
CD180	240	240	9	2	0.875	0.928571	23.1179
CD1C	237	237	9	2	0.866873	0.923214	24.5542
CD1D	234	234	8	2	0.846154	0.909091	15.8087
CD2	245	245	9	2	0.888889	0.9375	26.3134
CD200	235	235	9	2	0.861538	0.919643	26.6611
CD200R1	238	238	9	2	0.869565	0.925	20.2915
CD22	200	200	9	2	0.777778	0.857143	19.3872
CD24	251	251	9	2	0.906149	0.948214	27.7741
CD244	185	185	9	2	0.746667	0.830357	16.5045
CD274	253	253	8	2	0.896552	0.942308	19.2528
CD28	254	254	9	2	0.915033	0.953571	30.6135
CD300E	107	107	12	2	0.798883	0.874126	13.4716
CD300LB	8	8	7	2	0.833333	0.9	2.23333
CD302	257	257	9	2	0.924092	0.958929	32.5767
CD38	251	251	8	2	0.890966	0.938811	17.9005
CD3D	20	20	4	2	0.727273	0.8125	1.36859
CD3G	242	242	9	2	0.880503	0.932143	24.9298
CD46P1	32	32	18	2	0.970588	0.984848	1.38541
CD52	30	30	4	2	0.941176	0.96875	5.79248
CD63	55	55	11	2	0.95082	0.974138	15.8996
CD69	82	82	30	2	0.836066	0.901961	10.0214
CD74	3	3	6	1	1	1	0
CD8B	166	166	9	2	0.71066	0.796429	11.5929
CDC42BPA	38	38	25	2	0.88	0.931818	2.61024
CDCA7L	237	237	9	2	0.866873	0.923214	21.3106
CDKN1A	50	50	11	2	0.878788	0.931034	14.3646
CDKN1C	118	118	12	2	0.85119	0.912587	22.0756
CDKN2D	112	112	8	2	0.621739	0.695804	3.89087
CEACAM1	246	246	8	2	0.877301	0.93007	17.9196
CEACAM8	253	253	8	2	0.896552	0.942308	27.183
CEBPB	127	127	8	2	0.642697	0.722028	5.60286
CEBPD	44	44	5	2	0.755814	0.838462	2.29953
CENPK	30	30	18	2	0.916667	0.954545	0.580102
CEP19	54	54	26	2	0.909091	0.95	3.60369
CEP57L1	29	29	18	2	0.891892	0.939394	0.545619
CES1	112	112	12	2	0.821839	0.891608	11.8973
CFAP58-DT	258	258	8	2	0.910828	0.951049	21.4996
CFD	1	1	3	2	0.6	0.666667	0
CFL2	22	22	15	2	0.866667	0.923077	3.99943
CHD1	97	97	30	2	0.953271	0.97549	12.7065
CHI3L1	21	21	24	2	0.8	0.875	3.97
CHIC1	226	226	9	2	0.838323	0.903571	21.182
CHMP2B	85	85	30	2	0.857143	0.916667	6.07568
CHRM3-AS2	228	228	9	2	0.843373	0.907143	18.9143
CHROMR	245	245	8	2	0.874618	0.928322	17.9035
CHSY1	238	238	8	2	0.856287	0.916084	15.0091
CHURC1	53	53	26	2	0.895522	0.941667	4.05537
CIR1	237	237	8	2	0.853731	0.914336	14.7699
CISD1	62	62	5	2	0.955882	0.976923	3.93495
CKAP4	103	103	12	2	0.781421	0.86014	13.4117
CKLF	19	19	24	2	0.756757	0.839286	1.5278
CLC	233	233	9	2	0.856269	0.916071	28.799
CLEC12A	60	60	5	2	0.928571	0.961538	3.23015
CLEC12B	62	62	5	2	0.955882	0.976923	3.93495
CLEC4A	60	60	5	2	0.928571	0.961538	3.84933
CLEC4C	51	51	26	2	0.869565	0.925	3.35596
CLEC4D	244	244	8	2	0.871951	0.926573	14.317
CLEC4E	247	247	8	2	0.88	0.931818	18.9009
CLEC4F	277	277	8	2	0.969492	0.984266	31.1898
CLEC5A	250	250	8	2	0.888199	0.937063	18.1838
CLEC6A	256	256	8	2	0.905063	0.947552	23.4726
CMBL	87	87	30	2	0.871795	0.926471	6.92106
CMKLR1	18	18	20	2	0.846154	0.909091	0.753863
CMPK2	261	261	8	2	0.919614	0.956294	21.8558
CMTM2	135	135	9	2	0.658824	0.741071	11.441
CMTR1	108	108	12	2	0.803371	0.877622	11.8532
CNKSR2	201	201	9	2	0.779944	0.858929	12.7474
CNP	113	113	12	2	0.82659	0.895105	15.8187
CNR1	257	257	9	2	0.924092	0.958929	34.5972
CNR2	230	230	9	2	0.848485	0.910714	24.9448
CNTNAP3	226	226	9	2	0.838323	0.903571	20.1144
COL19A1	220	220	9	2	0.823529	0.892857	15.0593
COX20P1	59	59	26	2	0.983607	0.991667	4.83139
CPA3	232	232	9	2	0.853659	0.914286	23.0023
CPD	96	96	30	2	0.944444	0.970588	12.4685
CPPED1	54	54	5	2	0.855263	0.915385	2.87591
CR1	52	52	26	2	0.882353	0.933333	4.0597
CR1L	38	38	25	2	0.88	0.931818	2.43346
CR2	203	203	9	2	0.784314	0.8625	17.4196
CREB5	57	57	5	2	0.890411	0.938462	2.82348
CREG1	240	240	8	2	0.861446	0.91958	18.1106
CREM	93	93	30	2	0.918919	0.955882	6.92515
CRIM1	232	232	9	2	0.853659	0.914286	24.5611
CRISP3	256	256	8	2	0.905063	0.947552	24.3828
CRISPLD2	21	21	24	2	0.8	0.875	4.90133
CRPPA	30	30	18	2	0.916667	0.954545	0.617037
CRYZ	229	229	9	2	0.845921	0.908929	18.6906
CSGALNACT1	241	241	9	2	0.877743	0.930357	23.1638
CSGALNACT2	91	91	30	2	0.902655	0.946078	7.69558
CSRNP1	18	18	11	2	0.591837	0.655172	0.557523
CTSL	104	104	12	2	0.785714	0.863636	10.3617
CUTALP	246	246	9	2	0.89172	0.939286	25.3807
CX3CR1	252	252	9	2	0.909091	0.95	31.7029
CXCL1	46	46	26	2	0.810811	0.883333	3.00745
CXCL10	212	212	8	2	0.794444	0.870629	10.2632
CXCL11	261	261	8	2	0.919614	0.956294	26.6652
CXCL5	7	7	21	1	1	1	0.166667
CXCL8	19	19	13	2	0.88	0.931818	2.80894
CXCR1	27	27	24	2	0.965517	0.982143	16.3475
CXCR2	59	59	5	2	0.915493	0.953846	2.91095
CXCR6	218	218	9	2	0.818713	0.889286	21.1092
CYP1B1	55	55	26	2	0.923077	0.958333	3.39618
CYP4F3	59	59	5	2	0.915493	0.953846	3.03024
CYSLTR1	231	231	8	2	0.83871	0.903846	13.1439
CYSLTR2	233	233	9	2	0.856269	0.916071	19.6581
CYSTM1	223	223	8	2	0.819484	0.88986	14.1363
CYTH4	104	104	12	2	0.785714	0.863636	22.2997
DAPK2	6	6	7	2	0.714286	0.8	0.166667
DCAF12	42	42	25	2	0.956522	0.977273	4.57688
DCUN1D3	87	87	30	2	0.871795	0.926471	6.29767
DDAH2	179	179	8	2	0.727735	0.812937	16.3867
DDIT3	39	39	11	2	0.753247	0.836207	2.6575
DDX23	8	8	7	2	0.833333	0.9	1.26667
DDX43	19	19	15	2	0.787879	0.865385	2.2661
DDX58	238	238	8	2	0.856287	0.916084	12.743
DDX60	237	237	8	2	0.853731	0.914336	21.4558
DDX60L	265	265	8	2	0.931596	0.963287	30.8256
DEFB1	264	264	8	2	0.928571	0.961538	30.2608
DENND5A	87	87	30	2	0.871795	0.926471	7.50247
DGAT2	1	1	29	2	0.666667	0.75	0
DHRS13	17	17	24	2	0.717949	0.803571	0.826789
DHRS9	56	56	5	2	0.878378	0.930769	2.95775
DHX58	208	208	8	2	0.785714	0.863636	15.9575
DIAPH3	32	32	18	2	0.970588	0.984848	1.38541
DISC1	247	247	8	2	0.88	0.931818	16.1275
DLGAP5	31	31	18	2	0.942857	0.969697	1.31988
DMAC1	230	230	9	2	0.848485	0.910714	19.3752
DMTN	11	11	28	2	0.72	0.805556	0.635256
DNAAF1	129	129	12	2	0.910828	0.951049	60.3606
DNAH14	32	32	18	2	0.970588	0.984848	1.38541
DNAJC6	30	30	18	2	0.916667	0.954545	1.31666
DOCK4	91	91	30	2	0.902655	0.946078	7.51458
DOCK9	225	225	9	2	0.835821	0.901786	21.8817
DPEP2	30	30	4	2	0.941176	0.96875	6.01832
DPH5	234	234	9	2	0.858896	0.917857	20.2016
DPP4	235	235	9	2	0.861538	0.919643	22.7361
DPY19L1P1	28	28	18	2	0.868421	0.924242	0.508572
DSC1	262	262	9	2	0.939597	0.967857	35.8338
DSC2	4	4	14	1	1	1	0.333333
DSP	55	55	26	2	0.923077	0.958333	3.97852
DTX3L	216	216	8	2	0.803371	0.877622	14.1451
DUSP1	80	80	30	2	0.822581	0.892157	10.8511
DUSP5	84	84	30	2	0.85	0.911765	6.2494
DUSP6	248	248	8	2	0.882716	0.933566	16.5153
DYNLT1	239	239	8	2	0.858859	0.917832	14.2003
DYSF	104	104	12	2	0.785714	0.863636	9.9068
DZIP1L	124	124	12	2	0.882716	0.933566	27.2802
ECE1	35	35	11	2	0.716049	0.801724	2.13491
EEF1A1P5	149	149	9	2	0.681265	0.766071	10.9011
EEF1B2	273	273	9	2	0.97561	0.9875	38.17
EFHD2	25	25	11	2	0.637363	0.715517	1.07192
EIF1AY	90	90	30	2	0.894737	0.941176	7.66451
EIF2AK2	261	261	8	2	0.919614	0.956294	22.9291
ELAPOR1	157	157	9	2	0.694789	0.780357	13.6577
ELF1	266	266	8	2	0.934641	0.965035	27.8457
ELF4	42	42	11	2	0.783784	0.862069	5.49562
ELMO2	103	103	12	2	0.781421	0.86014	9.889
ELP4	227	227	9	2	0.840841	0.905357	23.5985
EMC3	39	39	25	2	0.897959	0.943182	2.43182
EMP1	73	73	30	2	0.778626	0.857843	4.60546
ENPP2	259	259	8	2	0.913738	0.952797	26.2391
ENPP5	237	237	9	2	0.866873	0.923214	27.0653
EOMES	220	220	9	2	0.823529	0.892857	18.3229
EPAS1	86	86	30	2	0.864407	0.921569	6.77438
EPB41	44	44	25	1	1	1	5.27795
EPB42	8	8	28	2	0.642857	0.722222	0.176923
EPHA4	214	214	9	2	0.809249	0.882143	17.8777
EPHX2	232	232	9	2	0.853659	0.914286	27.6442
EPSTI1	271	271	8	2	0.950166	0.973776	27.8858
ERAP2	57	57	26	2	0.952381	0.975	4.6461
EREG	81	81	30	2	0.829268	0.897059	5.68065
ERI1	247	247	8	2	0.88	0.931818	14.8525
ERICH3	269	269	8	2	0.943894	0.97028	28.7946
ERLIN1	93	93	12	2	0.740933	0.825175	7.20858
ERMN	21	21	15	2	0.83871	0.903846	3.42643
ESYT1	23	23	4	2	0.780488	0.859375	1.41207
ETS2	194	194	8	2	0.756614	0.839161	10.6939
ETV6	90	90	30	2	0.894737	0.941176	6.92309
ETV7	245	245	8	2	0.874618	0.928322	21.0704
EVI2A	56	56	5	2	0.878378	0.930769	3.19753
F13A1	6	6	22	1	1	1	0.4
F2RL1	53	53	26	2	0.895522	0.941667	3.40645
F5	53	53	26	2	0.895522	0.941667	3.32525
FAM106A	14	14	15	2	0.684211	0.769231	1.4573
FAM111A	54	54	26	2	0.909091	0.95	4.05537
FAM111B	213	213	9	2	0.806916	0.880357	17.3071
FAM153A	250	250	9	2	0.903226	0.946429	33.1454
FAM157A	260	260	8	2	0.916667	0.954545	26.2161
FAM157B	268	268	8	2	0.940789	0.968531	30.5816
FAM157C	116	116	12	2	0.841176	0.905594	20.3633
FAM184A	244	244	9	2	0.886076	0.935714	31.0783
FAM20A	130	130	12	2	0.916667	0.954545	32.6366
FAM210B	41	41	25	2	0.93617	0.965909	4.55249
FAM30A	199	199	9	2	0.775623	0.855357	17.7221
FAM3B	57	57	11	2	0.983051	0.991379	17.5995
FAM72A	274	274	8	2	0.959732	0.979021	30.2762
FAM8A1	263	263	8	2	0.925566	0.95979	22.8624
FANCL	4	4	0	2	0.833333	0.9	0
FAP	238	238	8	2	0.856287	0.916084	25.5962
FAS	247	247	8	2	0.88	0.931818	17.0105
FAXDC2	36	36	25	2	0.846154	0.909091	2.57095
FBXL5	59	59	5	2	0.915493	0.953846	3.87723
FBXO39	121	121	12	2	0.866667	0.923077	24.896
FBXO6	104	104	12	2	0.785714	0.863636	17.728
FCAR	108	108	12	2	0.803371	0.877622	10.7001
FCER1A	219	219	9	2	0.821114	0.891071	20.9175
FCER1G	127	127	12	2	0.899371	0.944056	34.2129
FCGR1A	90	90	12	2	0.729592	0.814685	7.86792
FCGR1B	74	74	12	2	0.674528	0.758741	5.73821
FCGR1CP	82	82	12	2	0.70098	0.786713	8.2355
FCGR2A	265	265	8	2	0.931596	0.963287	30.0598
FCGR2B	244	244	8	2	0.871951	0.926573	15.9835
FCGR2C	243	243	8	2	0.869301	0.924825	13.775
FCGR3A	58	58	5	2	0.902778	0.946154	3.39161
FCGR3B	65	65	5	1	1	1	4.43447
FCHO2	33	33	18	1	1	1	1.41666
FCMR	232	232	9	2	0.853659	0.914286	18.9361
FCN1	137	137	12	2	0.959732	0.979021	37.9737
FCRL1	242	242	9	2	0.880503	0.932143	24.2708
FCRL2	220	220	9	2	0.823529	0.892857	15.3385
FCRL3	236	236	9	2	0.864198	0.921429	22.1088
FCRL5	204	204	9	2	0.786517	0.864286	12.8821
FCRL6	191	191	9	2	0.758808	0.841071	15.7488
FCRLA	230	230	9	2	0.848485	0.910714	18.6413
FECH	35	35	25	2	0.830189	0.897727	2.50536
FFAR2	126	126	12	2	0.89375	0.940559	33.4746
FGF13	267	267	8	2	0.937705	0.966783	29.0177
FGFBP2	184	184	9	2	0.744681	0.828571	16.9768
FGL2	63	63	5	2	0.970149	0.984615	4.35072
FKBP4	38	38	11	2	0.74359	0.827586	3.99346
FKBP5	245	245	8	2	0.874618	0.928322	13.8366
FKBP8	6	6	28	2	0.6	0.666667	0.166667
FLACC1	25	25	18	2	0.804878	0.878788	0.362978
FLOT1	99	99	12	2	0.764706	0.846154	9.92263
FLVCR2	109	109	12	2	0.80791	0.881119	11.7051
FMN1	3	3	14	2	0.8	0.875	0
FMNL1	40	40	11	2	0.763158	0.844828	6.07242
FMNL2	261	261	8	2	0.919614	0.956294	23.4937
FNDC3B	261	261	8	2	0.919614	0.956294	20.8704
FNIP2	93	93	30	2	0.918919	0.955882	7.09024
FOS	73	73	30	2	0.778626	0.857843	8.92152
FOSL2	92	92	30	2	0.910714	0.95098	7.15516
FPR1	139	139	12	2	0.972789	0.986014	38.5308
FPR2	55	55	5	2	0.866667	0.923077	3.05442
FRAT2	27	27	24	2	0.965517	0.982143	15.4816
FRMD3	228	228	8	2	0.831395	0.898601	12.3333
FRY	259	259	9	2	0.930233	0.9625	33.6146
FSTL1	7	7	21	1	1	1	0.166667
FTH1	54	54	11	2	0.935484	0.965517	17.5075
G0S2	25	25	30	2	0.569832	0.622549	0.677501
GAB2	33	33	11	2	0.698795	0.784483	1.7032
GADD45B	33	33	11	2	0.698795	0.784483	3.70483
GALM	102	102	12	2	0.777174	0.856643	9.02039
GASK1B	60	60	5	2	0.928571	0.961538	3.10556
GBP1	270	270	8	2	0.94702	0.972028	29.8844
GBP1P1	245	245	8	2	0.874618	0.928322	14.0177
GBP2	261	261	8	2	0.919614	0.956294	30.1532
GBP3	215	215	8	2	0.80112	0.875874	12.4988
GBP4	246	246	8	2	0.877301	0.93007	17.9997
GBP5	273	273	8	2	0.956522	0.977273	31.5473
GBP6	255	255	8	2	0.902208	0.945804	25.8927
GCA	59	59	5	2	0.915493	0.953846	3.87723
GCH1	246	246	8	2	0.877301	0.93007	17.4093
GCNT4	227	227	9	2	0.840841	0.905357	21.2437
GCOM1	20	20	15	2	0.8125	0.884615	1.90026
GCSAM	233	233	9	2	0.856269	0.916071	19.2363
GGTA1	1	1	17	1	1	1	0
GIMAP4	60	60	5	2	0.928571	0.961538	3.82983
GIMAP6	53	53	26	2	0.895522	0.941667	4.12991
GIMAP8	54	54	26	2	0.909091	0.95	3.23148
GK	246	246	8	2	0.877301	0.93007	19.9936
GLIPR1	278	278	9	2	0.992908	0.996429	38.5798
GLIPR2	46	46	5	2	0.77381	0.853846	2.07379
GLRX	245	245	8	2	0.874618	0.928322	15.3238
GLRX5	37	37	25	2	0.862745	0.920455	2.13236
GLT1D1	110	110	12	2	0.8125	0.884615	12.9777
GLUL	99	99	30	2	0.971429	0.985294	13.8005
GMPR	7	7	28	2	0.62069	0.694444	0
GNG11	7	7	21	1	1	1	0.166667
GNLY	15	15	4	2	0.653061	0.734375	0.808086
GOLGA5P1	48	48	26	2	0.833333	0.9	3.35888
GOLGA8B	235	235	9	2	0.861538	0.919643	21.5003
GORASP1	114	114	12	2	0.831395	0.898601	15.1759
GPAT3	56	56	5	2	0.878378	0.930769	3.17386
GPR15	225	225	9	2	0.835821	0.901786	19.6426
GPR160	246	246	8	2	0.877301	0.93007	14.341
GPR174	257	257	9	2	0.924092	0.958929	31.8363
GPR27	60	60	5	2	0.928571	0.961538	4.01811
GPR34	234	234	9	2	0.858896	0.917857	20.632
GPR82	240	240	9	2	0.875	0.928571	28.2601
GRAMD1B	90	90	12	2	0.729592	0.814685	8.89363
GRAMD1C	234	234	9	2	0.858896	0.917857	18.9288
GRB14	7	7	21	1	1	1	0.166667
GRHL1	7	7	21	1	1	1	0.166667
GRIN3A	236	236	8	2	0.85119	0.912587	23.0453
GRN	77	77	12	2	0.684211	0.769231	9.65193
GSEC	64	64	5	2	0.984848	0.992308	4.41884
GSPT1	41	41	25	2	0.93617	0.965909	4.52624
GSTA7P	17	17	15	2	0.742857	0.826923	1.75094
GSTM1	29	29	4	2	0.914286	0.953125	6.53877
GSTM3	234	234	9	2	0.858896	0.917857	30.7579
GSTO1	112	112	12	2	0.821839	0.891608	13.2261
GTF2H2B	255	255	8	2	0.902208	0.945804	26.215
GTPBP1	39	39	11	2	0.753247	0.836207	3.40834
GTPBP2	106	106	12	2	0.794444	0.870629	11.6457
GUK1	6	6	28	2	0.6	0.666667	0.166667
GYG1	237	237	8	2	0.853731	0.914336	12.3029
GYPA	30	30	18	2	0.916667	0.954545	0.617037
GYPB	8	8	1	1	1	1	0.5
GYPC	28	28	25	2	0.733333	0.818182	3.14276
GZMA	250	250	9	2	0.903226	0.946429	32.1038
GZMB	1	1	3	2	0.6	0.666667	0
GZMH	21	21	4	2	0.744186	0.828125	1.43058
GZMK	218	218	9	2	0.818713	0.889286	22.0659
H1-0	38	38	11	2	0.74359	0.827586	2.14456
H2BC18	47	47	26	2	0.821918	0.891667	3.22695
H3-3B	271	271	8	2	0.950166	0.973776	31.5053
H4C5	25	25	4	2	0.820513	0.890625	2.61679
HAL	59	59	5	2	0.915493	0.953846	3.35589
HAUS4	15	15	24	2	0.682927	0.767857	1.36839
HAVCR2	95	95	12	2	0.748691	0.832168	7.59342
HBB	52	52	11	2	0.90625	0.948276	17.092
HBG2	57	57	11	2	0.983051	0.991379	17.5995
HCAR2	102	102	12	2	0.777174	0.856643	9.36514
HCAR3	106	106	12	2	0.794444	0.870629	11.3644
HDAC9	242	242	9	2	0.880503	0.932143	26.329
HECW2	62	62	5	2	0.955882	0.976923	3.97218
HECW2-AS1	249	249	9	2	0.900322	0.944643	31.75
HELZ2	33	33	12	2	0.565217	0.615385	1.31595
HEMGN	2	2	10	1	1	1	0
HEPACAM2	42	42	25	2	0.956522	0.977273	4.87971
HERC5	275	275	8	2	0.962963	0.980769	31.2445
HERC6	229	229	8	2	0.833819	0.90035	11.7333
HESX1	249	249	8	2	0.885449	0.935315	18.219
HIF1A	98	98	30	2	0.962264	0.980392	13.1397
HK2	84	84	30	2	0.85	0.911765	7.20235
HK3	4	4	24	2	0.538462	0.571429	0.037037
HLA-DOA	194	194	9	2	0.765027	0.846429	15.3364
HLA-DQA1	22	22	4	2	0.761905	0.84375	1.36859
HLA-DQA2	201	201	9	2	0.779944	0.858929	18.2233
HLA-DQB1	152	152	9	2	0.686275	0.771429	15.8434
HLA-DRB5	1	1	3	2	0.6	0.666667	0
HLA-DRB6	19	19	15	2	0.787879	0.865385	1.86859
HLA-V	88	88	30	2	0.87931	0.931373	7.0711
HMBS	2	2	10	1	1	1	0
HMGB1P6	3	3	14	2	0.8	0.875	0
HMOX1	101	101	12	2	0.772973	0.853147	12.7181
HNMT	235	235	9	2	0.861538	0.919643	22.2106
HNRNPLL	247	247	8	2	0.88	0.931818	15.2795
HOPX	220	220	9	2	0.823529	0.892857	18.506
HP	103	103	12	2	0.781421	0.86014	15.7389
HRH2	116	116	12	2	0.841176	0.905594	14.3015
HRH4	235	235	9	2	0.861538	0.919643	23.0166
HS3ST3B1	4	4	14	1	1	1	0.333333
HSH2D	107	107	12	2	0.798883	0.874126	9.96025
HSPA1A	40	40	26	2	0.75	0.833333	2.36389
HSPA1B	87	87	30	2	0.871795	0.926471	6.19455
HSPA5	49	49	11	2	0.865672	0.922414	10.7012
HSPA6	21	21	24	2	0.8	0.875	4.90133
HSPA7	119	119	12	2	0.856287	0.916084	24.0394
HSPA8	31	31	4	2	0.969697	0.984375	7.21091
HSPE1P18	50	50	26	2	0.857143	0.916667	3.47864
ICAM1	33	33	11	2	0.698795	0.784483	1.94102
ICAM3	3	3	7	2	0.588235	0.65	0
IDH1	53	53	26	2	0.895522	0.941667	3.19051
IDI1	213	213	8	2	0.796657	0.872378	14.4144
IDO1	199	199	8	2	0.766756	0.847902	7.98193
IFI27	92	92	12	2	0.737113	0.821678	16.4324
IFI35	86	86	12	2	0.715	0.800699	7.0631
IFI44	271	271	8	2	0.950166	0.973776	29.7423
IFI44L	276	276	8	2	0.966216	0.982517	31.5458
IFI6	148	148	8	2	0.674528	0.758741	9.13854
IFIH1	256	256	8	2	0.905063	0.947552	21.838
IFIT1	277	277	8	2	0.969492	0.984266	31.7607
IFIT1B	37	37	25	2	0.862745	0.920455	2.13236
IFIT2	282	282	8	2	0.986207	0.993007	31.986
IFIT3	281	281	8	2	0.982818	0.991259	31.922
IFIT5	267	267	8	2	0.937705	0.966783	27.9212
IFITM1	70	70	12	2	0.662037	0.744755	11.1556
IFITM2	104	104	12	2	0.785714	0.863636	21.2009
IFITM3	94	94	12	2	0.744792	0.828671	9.2226
IFNG	21	21	15	2	0.83871	0.903846	2.27158
IFNG-AS1	227	227	9	2	0.840841	0.905357	21.2701
IFNGR1	268	268	8	2	0.940789	0.968531	29.2407
IFNGR2	54	54	11	2	0.935484	0.965517	15.8212
IGHG1	5	5	27	2	0.592593	0.65625	0.083333
IGHM	14	14	4	2	0.64	0.71875	0.808086
IGHV3-11	28	28	4	2	0.888889	0.9375	6.53877
IGHV3-21	29	29	4	2	0.914286	0.953125	6.53877
IGHV3-23	12	12	27	2	0.8	0.875	1.06364
IGHV3-30	29	29	4	2	0.914286	0.953125	6.53877
IGHV3-48	28	28	4	2	0.888889	0.9375	6.53877
IGKC	16	16	27	1	1	1	12.6752
IGKV1-12	14	14	27	2	0.888889	0.9375	3.55094
IGKV1-16	10	10	27	2	0.727273	0.8125	0.530303
IGKV1-17	11	11	27	2	0.761905	0.84375	1.23781
IGKV1-27	11	11	27	2	0.761905	0.84375	0.983838
IGKV1-5	14	14	27	2	0.888889	0.9375	3.91003
IGKV2-29	10	10	7	1	1	1	5.05
IGKV3-11	13	13	27	2	0.842105	0.90625	1.25455
IGKV3-20	12	12	27	2	0.8	0.875	1.49336
IGKV4-1	12	12	27	2	0.8	0.875	1.49336
IGLC2	13	13	27	2	0.842105	0.90625	8.8267
IGLC3	2	2	27	2	0.533333	0.5625	0
IGLV2-14	9	9	27	2	0.695652	0.78125	0.730303
IGLV3-1	11	11	27	2	0.761905	0.84375	0.730303
IGLV3-19	11	11	27	2	0.761905	0.84375	0.952525
IGLV3-25	12	12	27	2	0.8	0.875	2.48384
IGLV8-61	30	30	4	2	0.941176	0.96875	6.73877
IGSF6	57	57	5	2	0.890411	0.938462	3.28208
IKBIP	256	256	9	2	0.921053	0.957143	30.9574
IKZF2	245	245	9	2	0.888889	0.9375	29.842
IL16	9	9	7	2	0.909091	0.95	1.88333
IL18R1	235	235	8	2	0.848665	0.910839	12.9909
IL18RAP	250	250	8	2	0.888199	0.937063	16.6622
IL1B	242	242	8	2	0.866667	0.923077	14.558
IL1R2	110	110	12	2	0.8125	0.884615	18.9225
IL1RAP	236	236	8	2	0.85119	0.912587	17.6451
IL1RL1	22	22	15	2	0.866667	0.923077	2.93092
IL1RN	181	181	8	2	0.731458	0.816434	10.3036
IL2RB	214	214	9	2	0.809249	0.882143	22.2755
IL31RA	88	88	30	2	0.87931	0.931373	9.80666
IL5RA	221	221	9	2	0.825959	0.894643	19.1879
IL6R	54	54	5	2	0.855263	0.915385	2.88405
IL7R	280	280	9	1	1	1	38.6862
IMPDH2	22	22	4	2	0.761905	0.84375	2.07617
INKA2	21	21	24	2	0.8	0.875	3.29807
INPP4B	259	259	9	2	0.930233	0.9625	33.3291
IPMK	53	53	5	2	0.844156	0.907692	2.35106
IRAG1	20	20	20	2	0.916667	0.954545	1.20464
IRAK2	44	44	11	2	0.805556	0.87931	8.10372
IRAK3	254	254	8	2	0.899371	0.944056	19.9451
IRF1	55	55	11	2	0.95082	0.974138	17.5689
IRF5	114	114	12	2	0.831395	0.898601	17.2174
IRF7	32	32	12	2	0.562992	0.611888	6.4624
IRS2	21	21	15	2	0.83871	0.903846	3.84153
ISG15	6	6	12	2	0.510714	0.520979	0.086971
ISG20	92	92	12	2	0.737113	0.821678	11.8275
ITGA6	256	256	9	2	0.921053	0.957143	31.9625
ITGA9	267	267	8	2	0.937705	0.966783	30.2206
ITGAX	42	42	11	2	0.783784	0.862069	4.51409
ITGB3	5	5	22	2	0.857143	0.916667	0.2
ITLN1	44	44	25	1	1	1	5.27795
ITM2A	249	249	9	2	0.900322	0.944643	29.5423
ITPRIP	41	41	11	2	0.773333	0.853448	5.05961
JAKMIP2	233	233	9	2	0.856269	0.916071	22.2918
JAM3	6	6	21	2	0.875	0.928571	0
JAML	22	22	20	1	1	1	1.53867
JMJD1C	97	97	30	2	0.953271	0.97549	13.1191
KCNE1	111	111	12	2	0.817143	0.888112	18.5166
KCNE3	57	57	26	2	0.952381	0.975	4.18226
KCNJ15	55	55	5	2	0.866667	0.923077	2.78559
KCNJ2	58	58	5	2	0.902778	0.946154	2.87355
KCNMA1	53	53	11	2	0.920635	0.956897	14.3015
KCTD12	56	56	5	2	0.878378	0.930769	2.65784
KCTD14	274	274	8	2	0.959732	0.979021	30.917
KDM6B	45	45	11	2	0.816901	0.887931	7.83094
KIAA0895L	134	134	12	2	0.940789	0.968531	59.7287
KIAA1958	246	246	8	2	0.877301	0.93007	17.9196
KIF15	29	29	18	2	0.891892	0.939394	0.544286
KIF18A	31	31	18	2	0.942857	0.969697	1.31988
KLF5	88	88	30	2	0.87931	0.931373	6.38694
KLF6	96	96	30	2	0.944444	0.970588	12.2587
KLHDC7B-DT	265	265	8	2	0.931596	0.963287	29.8928
KLHDC8B	23	23	24	2	0.848485	0.910714	6.95199
KLHL14	215	215	9	2	0.811594	0.883929	16.8987
KLRB1	253	253	9	2	0.912052	0.951786	30.7135
KLRC1	225	225	9	2	0.835821	0.901786	16.9044
KLRC2	218	218	9	2	0.818713	0.889286	17.3501
KLRF1	245	245	9	2	0.888889	0.9375	25.8138
KLRG1	227	227	9	2	0.840841	0.905357	21.8569
KMO	53	53	26	2	0.895522	0.941667	3.63477
KNL1	32	32	18	2	0.970588	0.984848	1.31295
KRCC1	51	51	26	2	0.869565	0.925	3.16923
KREMEN1	22	22	24	2	0.823529	0.892857	6.15916
KRT1	35	35	25	2	0.830189	0.897727	2.35543
KRT23	45	45	26	2	0.8	0.875	2.90048
L1TD1	58	58	26	2	0.967742	0.983333	4.44861
LACTB	233	233	8	2	0.843658	0.907343	13.5771
LAMP3	247	247	8	2	0.88	0.931818	14.6239
LAP3	246	246	8	2	0.877301	0.93007	24.1586
LAPTM4A	89	89	30	2	0.886957	0.936275	7.651
LCK	25	25	4	2	0.820513	0.890625	2.39141
LDHB	246	246	9	2	0.89172	0.939286	26.4833
LEF1	252	252	9	2	0.909091	0.95	28.0098
LEF1-AS1	238	238	9	2	0.869565	0.925	30.5701
LERFS	273	273	8	2	0.956522	0.977273	30.8282
LGALS2	9	9	7	2	0.909091	0.95	3.43333
LGALS3	6	6	1	2	0.8	0.875	0
LGALS3BP	118	118	12	2	0.85119	0.912587	49.9066
LGALS8	88	88	30	2	0.87931	0.931373	7.94725
LGALS9	116	116	12	2	0.841176	0.905594	20.7058
LHFPL2	237	237	8	2	0.853731	0.914336	12.695
LILRA5	105	105	12	2	0.790055	0.867133	22.2271
LILRA6	97	97	12	2	0.756614	0.839161	9.19724
LILRB1	240	240	8	2	0.861446	0.91958	20.3339
LILRB3	106	106	12	2	0.794444	0.870629	10.8629
LILRB4	83	83	30	2	0.842975	0.906863	5.8335
LIMA1	234	234	9	2	0.858896	0.917857	19.068
LIMK2	122	122	12	2	0.871951	0.926573	29.3216
LIN7A	59	59	5	2	0.915493	0.953846	3.03024
LINC00189	274	274	8	2	0.959732	0.979021	30.1525
LINC00278	66	66	30	2	0.73913	0.823529	4.15708
LINC00402	231	231	9	2	0.851064	0.9125	22.7925
LINC00570	43	43	25	2	0.977778	0.988636	5.22289
LINC00649	233	233	9	2	0.856269	0.916071	22.2918
LINC00861	201	201	9	2	0.779944	0.858929	19.3189
LINC00920	249	249	9	2	0.900322	0.944643	32.5253
LINC00926	173	173	9	2	0.723514	0.808929	16.3099
LINC00958	1	1	16	1	1	1	0
LINC00968	254	254	8	2	0.899371	0.944056	26.2071
LINC01036	31	31	18	2	0.942857	0.969697	1.31988
LINC01093	260	260	8	2	0.916667	0.954545	23.5424
LINC01127	18	18	20	2	0.846154	0.909091	0.753863
LINC01184	217	217	9	2	0.816327	0.8875	15.3287
LINC01270	56	56	11	2	0.966667	0.982759	17.3965
LINC01410	51	51	26	2	0.869565	0.925	3.22059
LINC01506	250	250	8	2	0.888199	0.937063	17.0508
LINC01550	236	236	9	2	0.864198	0.921429	25.2438
LINC01765	265	265	8	2	0.931596	0.963287	27.6978
LINC02068	254	254	8	2	0.899371	0.944056	26.2327
LINC02207	60	60	5	2	0.928571	0.961538	3.84933
LINC02218	51	51	26	2	0.869565	0.925	3.46205
LINC02224	21	21	13	2	0.956522	0.977273	2.61377
LINC02289	261	261	8	2	0.919614	0.956294	25.8652
LINC02397	151	151	9	2	0.684597	0.769643	7.81261
LINC02432	55	55	26	2	0.923077	0.958333	4.19156
LINC02446	234	234	9	2	0.858896	0.917857	20.6326
LINC02458	247	247	9	2	0.894569	0.941071	32.1795
LINC02470	51	51	26	2	0.869565	0.925	3.47864
LINC02528	244	244	8	2	0.871951	0.926573	21.2798
LINC02555	216	216	8	2	0.803371	0.877622	13.7121
LINC02574	126	126	12	2	0.89375	0.940559	28.3709
LINC02649	92	92	30	2	0.910714	0.95098	6.85635
LINC02656	89	89	30	2	0.886957	0.936275	6.58668
LINC02772	34	34	25	2	0.814815	0.886364	2.35499
LINC02785	253	253	8	2	0.896552	0.942308	23.2089
LIPN	61	61	5	2	0.942029	0.969231	3.639
LITAF	258	258	8	2	0.910828	0.951049	30.0682
LMNB1	255	255	8	2	0.902208	0.945804	19.699
LMNB1-DT	101	101	30	2	0.990291	0.995098	13.8476
LMO2	232	232	8	2	0.841176	0.905594	13.4342
LMTK2	92	92	30	2	0.910714	0.95098	7.11892
LONRF1	89	89	30	2	0.886957	0.936275	6.34292
LPAR1	18	18	20	2	0.846154	0.909091	0.753863
LRG1	80	80	12	2	0.694175	0.77972	6.40899
LRRC4	54	54	5	2	0.855263	0.915385	3.64269
LRRC70	88	88	30	2	0.87931	0.931373	6.45316
LRRK2	63	63	5	2	0.970149	0.984615	4.35072
LRRN3	188	188	9	2	0.752688	0.835714	13.6429
LTB4R	19	19	24	2	0.756757	0.839286	3.74114
LTF	108	108	12	2	0.803371	0.877622	16.1999
LUCAT1	54	54	26	2	0.909091	0.95	3.96791
LY6E	66	66	12	2	0.65	0.730769	4.75087
LY96	235	235	8	2	0.848665	0.910839	13.514
LYN	271	271	8	2	0.950166	0.973776	27.9498
LYRM7	245	245	9	2	0.888889	0.9375	24.2677
LYZ	284	284	8	2	0.993056	0.996503	32.0042
MAD2L1BP	107	107	12	2	0.798883	0.874126	10.0533
MAFB	90	90	30	2	0.894737	0.941176	6.40993
MAL	156	156	9	2	0.693069	0.778571	15.7682
MANSC1	52	52	26	2	0.882353	0.933333	3.79439
MAP2K6	208	208	8	2	0.785714	0.863636	9.30297
MAP3K13	248	248	8	2	0.882716	0.933566	19.5028
MAP3K7CL	5	5	0	1	1	1	0.25
MAPKAPK2	38	38	11	2	0.74359	0.827586	2.51609
MARCKS	98	98	30	2	0.962264	0.980392	13.1189
MARCO	114	114	12	2	0.831395	0.898601	25.4692
MASTL	92	92	30	2	0.910714	0.95098	7.15516
MBLAC2	195	195	9	2	0.767123	0.848214	13.747
MCEMP1	125	125	12	2	0.888199	0.937063	24.9632
MCL1	281	281	8	2	0.982818	0.991259	31.9005
MED12L	5	5	0	1	1	1	0.25
MEF2A	238	238	8	2	0.856287	0.916084	13.6473
MEFV	122	122	12	2	0.871951	0.926573	30.7537
MEGF9	55	55	26	2	0.923077	0.958333	4.19806
MERTK	112	112	12	2	0.821839	0.891608	18.1993
MFSD14B	54	54	26	2	0.909091	0.95	4.05537
MGAM	57	57	5	2	0.890411	0.938462	2.6937
MGAM2	53	53	26	2	0.895522	0.941667	3.73787
MID2	236	236	9	2	0.864198	0.921429	31.1804
MILR1	78	78	12	2	0.6875	0.772727	4.92445
MINPP1	29	29	18	2	0.891892	0.939394	0.545619
MIR223HG	52	52	5	2	0.833333	0.9	2.64239
MIR29B2CHG	30	30	11	2	0.674419	0.758621	1.35634
MIR3609	20	20	13	2	0.916667	0.954545	2.84919
MIR3945HG	246	246	8	2	0.877301	0.93007	24.1948
MKRN3	270	270	9	2	0.965517	0.982143	37.0442
MME	1	1	16	1	1	1	0
MMP25	14	14	24	2	0.666667	0.75	1.12823
MMP8	245	245	8	2	0.874618	0.928322	20.6319
MMRN1	6	6	22	1	1	1	0.4
MNDA	65	65	5	1	1	1	4.43447
MORC3	5	5	0	1	1	1	0.25
MOSPD2	49	49	26	2	0.84507	0.908333	2.86797
MOV10	116	116	12	2	0.841176	0.905594	14.9756
MPP1	43	43	25	2	0.977778	0.988636	4.65252
MPZL1	248	248	9	2	0.897436	0.942857	29.2281
MPZL2	59	59	5	2	0.915493	0.953846	3.83238
MPZL3	54	54	26	2	0.909091	0.95	3.96791
MROCKI	91	91	30	2	0.902655	0.946078	7.6778
MS4A1	263	263	9	2	0.942761	0.969643	33.0723
MS4A2	232	232	9	2	0.853659	0.914286	23.163
MS4A3	214	214	9	2	0.809249	0.882143	18.7244
MS4A4A	252	252	8	2	0.89375	0.940559	18.3478
MS4A6A	251	251	8	2	0.890966	0.938811	19.2168
MS4A7	56	56	26	2	0.9375	0.966667	3.74636
MSR1	243	243	8	2	0.869301	0.924825	15.6324
MSRB1	13	13	24	2	0.651163	0.732143	0.940618
MSRB2	21	21	24	2	0.8	0.875	4.97964
MT2A	147	147	8	2	0.672941	0.756993	9.02093
MTARC1	61	61	5	2	0.942029	0.969231	3.99788
MTCO1P12	85	85	30	2	0.857143	0.916667	5.9625
MTCO3P23	82	82	30	2	0.836066	0.901961	5.97662
MTCYBP23	77	77	30	2	0.80315	0.877451	5.85957
MTHFD2	245	245	8	2	0.874618	0.928322	15.0537
MTND5P32	81	81	30	2	0.829268	0.897059	5.96302
MT-RNR1	53	53	11	2	0.920635	0.956897	15.8212
MT-RNR2	98	98	30	2	0.962264	0.980392	13.1615
MT-TT	15	15	13	2	0.758621	0.840909	0.666215
MT-TW	11	11	13	2	0.666667	0.75	0.486068
MTUS1	242	242	9	2	0.880503	0.932143	30.3675
MX1	271	271	8	2	0.950166	0.973776	30.5043
MX2	247	247	8	2	0.88	0.931818	18.5012
MXD1	272	272	8	2	0.953333	0.975524	30.5776
MXRA7	19	19	15	2	0.787879	0.865385	2.13766
MYO10	266	266	8	2	0.934641	0.965035	29.4158
MYOM2	21	21	20	2	0.956522	0.977273	1.49105
N4BP1	89	89	30	2	0.886957	0.936275	7.84245
N6AMT1	220	220	9	2	0.823529	0.892857	20.7859
NAIP	241	241	8	2	0.864048	0.921329	12.2551
NAIPP1	124	124	12	2	0.882716	0.933566	26.9348
NAIPP2	13	13	24	2	0.651163	0.732143	1.31196
NAIPP4	264	264	8	2	0.928571	0.961538	26.7625
NAMPT	286	286	8	1	1	1	32.0366
NAMPTP1	234	234	8	2	0.846154	0.909091	17.179
NAPA	39	39	11	2	0.753247	0.836207	6.07283
NAPSB	2	2	29	1	1	1	1
NBN	268	268	8	2	0.940789	0.968531	30.2397
NCAPG	25	25	18	2	0.804878	0.878788	0.362978
NCF1	59	59	12	2	0.629956	0.706294	4.06176
NCF2	57	57	5	2	0.890411	0.938462	3.73679
NCF4	13	13	24	2	0.651163	0.732143	0.940618
NCOA7	229	229	8	2	0.833819	0.90035	16.8297
NEAT1	98	98	30	2	0.962264	0.980392	13.1615
NEBL	1	1	17	1	1	1	0
NEIL3	32	32	18	2	0.970588	0.984848	1.31666
NELL2	248	248	9	2	0.897436	0.942857	26.721
NEXN	242	242	8	2	0.866667	0.923077	14.7421
NFATC2	241	241	9	2	0.877743	0.930357	23.259
NFE4	61	61	5	2	0.942029	0.969231	4.00251
NFIL3	234	234	8	2	0.846154	0.909091	14.5984
NFKBIA	71	71	30	2	0.766917	0.848039	9.79218
NFKBIE	34	34	11	2	0.707317	0.793103	3.26728
NFKBIZ	82	82	30	2	0.836066	0.901961	10.2054
NFXL1	21	21	15	2	0.83871	0.903846	3.96163
NHS	234	234	9	2	0.858896	0.917857	24.1023
NHSL2	20	20	20	2	0.916667	0.954545	1.20464
NIBAN1	54	54	5	2	0.855263	0.915385	3.08651
NIBAN3	181	181	9	2	0.738786	0.823214	15.3238
NLRC3	204	204	9	2	0.786517	0.864286	20.3849
NLRC4	53	53	26	2	0.895522	0.941667	3.28991
NLRP12	6	6	7	2	0.714286	0.8	0.166667
NLRP3	103	103	12	2	0.781421	0.86014	12.5734
NMI	254	254	8	2	0.899371	0.944056	19.6173
NMT2	220	220	9	2	0.823529	0.892857	18.7341
NOD2	89	89	30	2	0.886957	0.936275	6.69635
NOG	247	247	9	2	0.894569	0.941071	30.6563
NPC2	116	116	12	2	0.841176	0.905594	18.8213
NPRL3	33	33	25	2	0.8	0.875	3.19905
NR3C2	235	235	9	2	0.861538	0.919643	22.2042
NRG1	242	242	9	2	0.880503	0.932143	30.4198
NRIR	261	261	8	2	0.919614	0.956294	21.9643
NRN1	275	275	8	2	0.962963	0.980769	31.2159
NT5C2	260	260	8	2	0.916667	0.954545	23.3565
NT5C3A	267	267	8	2	0.937705	0.966783	28.1691
NT5C3AP1	259	259	8	2	0.913738	0.952797	26.2218
NT5DC1	223	223	9	2	0.830861	0.898214	16.3641
NT5E	236	236	9	2	0.864198	0.921429	19.103
NTNG2	116	116	12	2	0.841176	0.905594	15.9827
NUB1	222	222	8	2	0.817143	0.888112	14.7464
NUP62CL	33	33	18	1	1	1	1.41666
OAS1	267	267	8	2	0.937705	0.966783	22.9588
OAS2	267	267	8	2	0.937705	0.966783	23.1532
OAS3	250	250	8	2	0.888199	0.937063	22.0066
OASL	191	191	8	2	0.750656	0.833916	13.6422
OGFRL1	280	280	9	1	1	1	38.6862
OLFM4	245	245	8	2	0.874618	0.928322	23.8284
OLIG2	274	274	9	2	0.979021	0.989286	38.4466
OLR1	87	87	30	2	0.871795	0.926471	6.9348
OR2W3	18	18	28	1	1	1	9.27379
OR52K1	49	49	26	2	0.84507	0.908333	3.42024
OR52K3P	261	261	8	2	0.919614	0.956294	21.9088
OSBP2	18	18	28	1	1	1	9.27379
OSBPL10	230	230	9	2	0.848485	0.910714	20.8815
OTOF	115	115	12	2	0.836257	0.902098	25.5371
OVCH1-AS1	81	81	30	2	0.829268	0.897059	5.96001
OXTR	4	4	14	1	1	1	0.333333
P2RY10	257	257	9	2	0.924092	0.958929	32.0652
P2RY14	184	184	8	2	0.737113	0.821678	7.11799
PADI2	15	15	24	2	0.682927	0.767857	0.705466
PAIP2B	238	238	9	2	0.869565	0.925	25.0463
PARP11	223	223	8	2	0.819484	0.88986	11.5237
PARP12	239	239	8	2	0.858859	0.917832	15.3138
PARP14	276	276	8	2	0.966216	0.982517	31.5691
PARP9	263	263	8	2	0.925566	0.95979	26.4986
PASK	160	160	9	2	0.7	0.785714	11.2464
PATJ	238	238	9	2	0.869565	0.925	23.9554
PATL1	93	93	30	2	0.918919	0.955882	7.04063
PAX8-AS1	20	20	20	2	0.916667	0.954545	1.1095
PCBP1-AS1	235	235	8	2	0.848665	0.910839	13.9753
PCDH9	173	173	9	2	0.723514	0.808929	17.8332
PCNT	4	4	0	2	0.833333	0.9	0
PCYOX1	231	231	9	2	0.851064	0.9125	19.8531
PDCD1LG2	258	258	8	2	0.910828	0.951049	26.358
PDK4	59	59	5	2	0.915493	0.953846	3.50414
PELI1	96	96	30	2	0.944444	0.970588	13.0771
PF4	1	1	19	1	1	1	0
PF4V1	1	1	19	1	1	1	0
PFKFB2	228	228	8	2	0.831395	0.898601	14.5779
PFKFB3	177	177	8	2	0.724051	0.809441	9.45383
PGAP1	71	71	30	2	0.766917	0.848039	5.01676
PGS1	102	102	12	2	0.777174	0.856643	11.0484
PHACTR1	44	44	11	2	0.805556	0.87931	5.65603
PHC2	98	98	12	2	0.760638	0.842657	8.94068
PI3	25	25	4	2	0.820513	0.890625	6.46734
PID1	233	233	9	2	0.856269	0.916071	26.1375
PIGC	36	36	25	2	0.846154	0.909091	2.04412
PIGX	236	236	9	2	0.864198	0.921429	25.6181
PIK3R5	41	41	11	2	0.773333	0.853448	4.19607
PIM2	49	49	11	2	0.865672	0.922414	8.21502
PIM3	23	23	11	2	0.623656	0.698276	1.00131
PINK1	8	8	28	2	0.642857	0.722222	0.176923
PITHD1	35	35	25	2	0.830189	0.897727	2.48773
PIWIL4	89	89	30	2	0.886957	0.936275	6.36025
PKD2L1	130	130	12	2	0.916667	0.954545	32.7152
PLAC8	253	253	8	2	0.896552	0.942308	19.6264
PLAGL1	77	77	30	2	0.80315	0.877451	5.56709
PLAUR	38	38	11	2	0.74359	0.827586	2.51609
PLBD1	55	55	5	2	0.866667	0.923077	3.03791
PLBD1-AS1	53	53	26	2	0.895522	0.941667	3.52727
PLCG1	24	24	4	2	0.8	0.875	2.01384
PLEK	54	54	11	2	0.935484	0.965517	17.5075
PLEK2	42	42	25	2	0.956522	0.977273	4.59023
PLEKHA1	253	253	9	2	0.912052	0.951786	28.3669
PLEKHG1	234	234	9	2	0.858896	0.917857	18.7764
PLEKHG3	20	20	4	2	0.727273	0.8125	1.10502
PLEKHO2	107	107	12	2	0.798883	0.874126	9.79001
PLIN3	96	96	12	2	0.752632	0.835664	8.70113
PLP2	44	44	11	2	0.805556	0.87931	3.62043
PLSCR1	263	263	8	2	0.925566	0.95979	27.6834
PLSCR4	5	5	0	1	1	1	0.25
PMAIP1	92	92	30	2	0.910714	0.95098	8.3097
PML	113	113	12	2	0.82659	0.895105	13.1476
PNPT1	248	248	8	2	0.882716	0.933566	15.3687
POLE2	29	29	18	2	0.891892	0.939394	0.906489
POLR2A	42	42	11	2	0.783784	0.862069	6.97809
PPBP	7	7	21	1	1	1	0.166667
PPCDC	111	111	12	2	0.817143	0.888112	16.4954
PPIF	42	42	11	2	0.783784	0.862069	3.2223
PPM1K-DT	277	277	8	2	0.969492	0.984266	31.4115
PPP1R15A	27	27	11	2	0.651685	0.732759	2.60852
PPP1R3B	248	248	8	2	0.882716	0.933566	17.1154
PRDM1	87	87	30	2	0.871795	0.926471	6.48557
PRDM5	60	60	5	2	0.928571	0.961538	3.44933
PRDX6	15	15	28	2	0.857143	0.916667	4.01353
PRELID2	8	8	1	1	1	1	0.5
PRF1	6	6	7	2	0.714286	0.8	0.616667
PRKCE	88	88	30	2	0.87931	0.931373	6.58205
PRKCQ-AS1	248	248	9	2	0.897436	0.942857	27.0595
PRLR	90	90	30	2	0.894737	0.941176	6.62459
PROK2	55	55	5	2	0.866667	0.923077	2.94176
PROS1	6	6	22	1	1	1	0.4
PRR5L	205	205	9	2	0.788732	0.866071	17.4748
PRRG4	61	61	5	2	0.942029	0.969231	3.63711
PRSS23	207	207	9	2	0.793201	0.869643	16.8551
PSPHP1	57	57	26	2	0.952381	0.975	4.38695
PSTPIP2	245	245	8	2	0.874618	0.928322	15.0136
PTAFR	3	3	3	1	1	1	3
PTGDR	234	234	9	2	0.858896	0.917857	23.4808
PTGS2	46	46	26	2	0.810811	0.883333	3.17074
PTPRK	220	220	9	2	0.823529	0.892857	20.974
PURA	219	219	9	2	0.821114	0.891071	23.4604
PYGL	27	27	24	2	0.965517	0.982143	16.3475
QPCT	57	57	5	2	0.890411	0.938462	2.6937
RAB1A	91	91	30	2	0.902655	0.946078	7.69558
RAB1AP1	91	91	30	2	0.902655	0.946078	7.40112
RAB20	184	184	8	2	0.737113	0.821678	16.0067
RAB3D	20	20	20	2	0.916667	0.954545	1.31576
RAB5A	90	90	30	2	0.894737	0.941176	7.72585
RAB5IF	228	228	8	2	0.831395	0.898601	17.7407
RAB8A	107	107	12	2	0.798883	0.874126	10.5474
RALB	253	253	8	2	0.896552	0.942308	19.8708
RANBP17	32	32	18	2	0.970588	0.984848	1.38541
RASGEF1B	89	89	30	2	0.886957	0.936275	7.60784
RBCK1	216	216	8	2	0.803371	0.877622	16.9453
RBM11	265	265	8	2	0.931596	0.963287	26.8048
RBM33	33	33	18	1	1	1	1.41666
RBM38	10	10	28	2	0.692308	0.777778	0.167832
RBM47	243	243	8	2	0.869301	0.924825	14.001
RCAN3	252	252	9	2	0.909091	0.95	27.8897
RCL1	8	8	1	1	1	1	0.5
RGL1	263	263	8	2	0.925566	0.95979	25.9884
RGPD2	57	57	11	2	0.983051	0.991379	17.5995
RGS1	80	80	30	2	0.822581	0.892157	6.02293
RGS2	61	61	5	2	0.942029	0.969231	4.18842
RHOBTB3	30	30	18	2	0.916667	0.954545	1.20184
RHOG	101	101	12	2	0.772973	0.853147	13.5176
RILPL2	44	44	11	2	0.805556	0.87931	6.12666
RIN2	248	248	8	2	0.882716	0.933566	15.6273
RIPK2	92	92	30	2	0.910714	0.95098	6.85382
RIT1	88	88	30	2	0.87931	0.931373	7.94725
RMI1	49	49	26	2	0.84507	0.908333	3.12669
RMI2	262	262	8	2	0.922581	0.958042	26.3993
RN7SL1	1	1	2	1	1	1	0
RN7SL124P	100	100	30	2	0.980769	0.990196	13.454
RNASE2	68	68	12	2	0.655963	0.737762	3.67705
RNASE6	16	16	4	2	0.666667	0.75	0.948779
RNASEL	55	55	26	2	0.923077	0.958333	3.24158
RNF138	85	85	30	2	0.857143	0.916667	7.78259
RNF144B	224	224	8	2	0.821839	0.891608	14.7561
RNF182	105	105	9	2	0.615385	0.6875	7.68961
RNF19B	29	29	11	2	0.666667	0.75	1.12711
RNF213	142	142	12	2	0.993056	0.996503	38.785
RNU4-1	20	20	13	2	0.916667	0.954545	2.72787
RNU4-2	20	20	13	2	0.916667	0.954545	2.80894
RNU5A-1	17	17	13	2	0.814815	0.886364	0.912947
RNU5B-1	18	18	13	2	0.846154	0.909091	1.25371
RNVU1-28	20	20	13	2	0.916667	0.954545	2.38678
RNY1	20	20	13	2	0.916667	0.954545	2.80894
RPGRIP1	233	233	9	2	0.856269	0.916071	24.8736
RPIA	38	38	25	2	0.88	0.931818	2.76371
RPL10P9	23	23	4	2	0.780488	0.859375	6.46734
RPL22	252	252	9	2	0.909091	0.95	32.3099
RPL3	31	31	4	2	0.969697	0.984375	7.21091
RPS26	20	20	4	2	0.727273	0.8125	1.4506
RPS2P5	20	20	4	2	0.727273	0.8125	1.10502
RPS4Y1	20	20	15	2	0.8125	0.884615	3.91815
RPS6KA5	258	258	9	2	0.927152	0.960714	31.217
RPSAP58	30	30	4	2	0.941176	0.96875	6.6102
RSAD2	277	277	8	2	0.969492	0.984266	31.7607
RTKN2	207	207	9	2	0.793201	0.869643	13.6695
RTN1	197	197	9	2	0.77135	0.851786	18.8479
RTP4	215	215	8	2	0.80112	0.875874	10.5617
RUBCN	99	99	12	2	0.764706	0.846154	7.92384
RUBCNL	251	251	9	2	0.906149	0.948214	29.6203
RUFY4	126	126	12	2	0.89375	0.940559	31.3065
S100A12	244	244	8	2	0.871951	0.926573	18.2394
S100A8	142	142	12	2	0.993056	0.996503	68.4779
S100A9	142	142	12	2	0.993056	0.996503	68.4779
S100B	229	229	9	2	0.845921	0.908929	31.1935
S100P	97	97	12	2	0.756614	0.839161	8.85067
S1PR1	254	254	9	2	0.915033	0.953571	33.0354
S1PR3	263	263	8	2	0.925566	0.95979	25.9744
SACS	249	249	9	2	0.900322	0.944643	32.264
SAMD12	242	242	9	2	0.880503	0.932143	28.7886
SAMD4A	252	252	8	2	0.89375	0.940559	18.6151
SAMD9	273	273	8	2	0.956522	0.977273	31.6069
SAMD9L	253	253	8	2	0.896552	0.942308	28.0674
SAMSN1	95	95	30	2	0.93578	0.965686	12.1187
SAP30	233	233	8	2	0.843658	0.907343	19.6784
SAT1	269	269	8	2	0.943894	0.97028	31.4909
SCARB2	243	243	8	2	0.869301	0.924825	14.759
SCARF1	187	187	8	2	0.742857	0.826923	16.7416
SCARNA10	16	16	13	2	0.785714	0.863636	1.25371
SCARNA5	19	19	13	2	0.88	0.931818	2.80894
SCARNA6	2	2	23	1	1	1	0
SCAT8	64	64	5	2	0.984848	0.992308	4.41884
SCML1	19	19	15	2	0.787879	0.865385	3.24053
SDC2	21	21	15	2	0.83871	0.903846	2.424
SECTM1	167	167	8	2	0.706173	0.791958	12.1038
SELENBP1	11	11	28	2	0.72	0.805556	0.378943
SELL	277	277	8	2	0.969492	0.984266	31.6281
SELPLG	1	1	29	2	0.666667	0.75	0
SEMA3C	230	230	9	2	0.848485	0.910714	19.7706
SEPTIN4	117	117	12	2	0.846154	0.909091	21.4149
SERPINA1	108	108	12	2	0.803371	0.877622	11.8532
SERPINB1	256	256	8	2	0.905063	0.947552	24.0845
SERPINB10	52	52	26	2	0.882353	0.933333	3.62184
SERPINB9P1	31	31	11	2	0.682353	0.767241	2.06508
SERPING1	100	100	12	2	0.768817	0.84965	9.23405
SGK1	236	236	9	2	0.864198	0.921429	32.2917
SH3BGRL2	5	5	22	2	0.857143	0.916667	0.2
SH3YL1	240	240	9	2	0.875	0.928571	23.2241
SHFL	206	206	8	2	0.781421	0.86014	16.6107
SHISA5	107	107	12	2	0.798883	0.874126	13.795
SIGLEC1	115	115	12	2	0.836257	0.902098	14.8568
SIGLEC10	24	24	4	2	0.8	0.875	2.01384
SIGLEC14	122	122	12	2	0.871951	0.926573	23.011
SIGLEC5	56	56	5	2	0.878378	0.930769	3.83238
SIGLEC8	264	264	9	2	0.945946	0.971429	37.4032
SIPA1L2	242	242	8	2	0.866667	0.923077	14.5997
SIRPB2	20	20	20	2	0.916667	0.954545	1.1095
SKA3	32	32	18	2	0.970588	0.984848	1.31295
SLA	133	133	12	2	0.934641	0.965035	35.5622
SLAMF6	233	233	9	2	0.856269	0.916071	24.2838
SLC14A1	37	37	25	2	0.862745	0.920455	2.37627
SLC15A4	84	84	30	2	0.85	0.911765	7.40788
SLC16A10	239	239	9	2	0.872274	0.926786	25.8023
SLC16A14	271	271	9	2	0.968858	0.983929	38.1335
SLC16A6	244	244	8	2	0.871951	0.926573	16.1687
SLC16A7	251	251	9	2	0.906149	0.948214	32.1167
SLC1A3	262	262	8	2	0.922581	0.958042	26.3976
SLC24A1	263	263	8	2	0.925566	0.95979	26.6803
SLC25A21	33	33	18	1	1	1	1.41666
SLC25A39	14	14	28	2	0.818182	0.888889	4.18694
SLC26A8	260	260	8	2	0.916667	0.954545	23.3623
SLC2A14	88	88	30	2	0.87931	0.931373	10.8599
SLC2A3	256	256	8	2	0.905063	0.947552	29.4761
SLC31A2	212	212	8	2	0.794444	0.870629	11.8179
SLC37A2	16	16	20	2	0.785714	0.863636	0.703863
SLC3A2	38	38	11	2	0.74359	0.827586	2.64753
SLC44A5	272	272	9	2	0.972222	0.985714	38.2171
SLC4A1	33	33	25	2	0.8	0.875	2.10779
SLC4A10	222	222	9	2	0.828402	0.896429	15.6616
SLC4A7	257	257	9	2	0.924092	0.958929	32.5255
SLC5A3	247	247	9	2	0.894569	0.941071	32.2003
SLC5A9	275	275	8	2	0.962963	0.980769	31.2159
SLC9A8	87	87	30	2	0.871795	0.926471	6.58125
SLED1	76	76	30	2	0.796875	0.872549	5.01049
SLFN5	57	57	26	2	0.952381	0.975	4.6461
SLPI	23	23	24	2	0.848485	0.910714	6.83756
SMAP2	120	120	12	2	0.861446	0.91958	20.7608
SMN2	252	252	9	2	0.909091	0.95	33.4943
SNCA	43	43	25	2	0.977778	0.988636	5.16527
SNHG14	260	260	9	2	0.933333	0.964286	32.7304
SNORA12	20	20	13	2	0.916667	0.954545	2.72787
SNORA22	18	18	13	2	0.846154	0.909091	1.33557
SNORA23	18	18	13	2	0.846154	0.909091	1.1051
SNORA49	20	20	13	2	0.916667	0.954545	1.77177
SNORA53	18	18	13	2	0.846154	0.909091	2.46904
SNORA54	16	16	13	2	0.785714	0.863636	0.971771
SNORA73B	2	2	23	1	1	1	0
SNORA74A	21	21	13	2	0.956522	0.977273	2.61377
SNORA79B	17	17	13	2	0.814815	0.886364	1.12653
SNORD13	17	17	13	2	0.814815	0.886364	0.912947
SNORD17	2	2	23	1	1	1	0
SOCS1	94	94	30	2	0.927273	0.960784	12.4324
SOCS3	137	137	8	2	0.657471	0.73951	6.82112
SOD2	281	281	8	2	0.982818	0.991259	31.9005
SORL1	60	60	26	1	1	1	4.88647
SORT1	100	100	12	2	0.768817	0.84965	10.8012
SOX6	6	6	1	2	0.8	0.875	0
SP110	231	231	8	2	0.83871	0.903846	13.1439
SPATS2L	240	240	8	2	0.861446	0.91958	14.4173
SPECC1	41	41	25	2	0.93617	0.965909	4.55249
SPP1	20	20	15	2	0.8125	0.884615	2.41193
SPRED1	228	228	9	2	0.843373	0.907143	22.8964
SPTB	17	17	28	2	0.947368	0.972222	6.75712
SPTBN1	224	224	9	2	0.833333	0.9	29.3176
SPTLC2	250	250	8	2	0.888199	0.937063	19.7698
SPX	5	5	22	2	0.857143	0.916667	0.2
SRGAP2	105	105	12	2	0.790055	0.867133	9.90803
SRGAP2B	102	102	12	2	0.777174	0.856643	13.3985
SRGAP2C	248	248	8	2	0.882716	0.933566	18.1118
SRGN	284	284	8	2	0.993056	0.996503	32.0042
SRRD	36	36	25	2	0.846154	0.909091	2.31908
SRRM2	23	23	15	2	0.896552	0.942308	4.49136
SSPN	229	229	9	2	0.845921	0.908929	28.314
ST20	56	56	26	2	0.9375	0.966667	4.17891
ST3GAL4	118	118	12	2	0.85119	0.912587	18.531
ST8SIA1	222	222	9	2	0.828402	0.896429	20.917
STAP1	231	231	8	2	0.83871	0.903846	12.888
STARD4	86	86	30	2	0.864407	0.921569	6.25996
STAT1	280	280	8	2	0.979452	0.98951	31.5213
STAT2	123	123	12	2	0.877301	0.93007	26.0116
STEAP4	55	55	5	2	0.866667	0.923077	2.78559
STIL	2	2	10	1	1	1	0
STMN1	237	237	9	2	0.866873	0.923214	22.7891
STOML1	248	248	8	2	0.882716	0.933566	27.1746
STRADB	40	40	25	2	0.916667	0.954545	4.55188
STX11	229	229	8	2	0.833819	0.90035	15.8761
STX3	250	250	8	2	0.888199	0.937063	17.7412
STXBP5	273	273	9	2	0.97561	0.9875	35.3111
SULT1A1	17	17	24	2	0.717949	0.803571	2.16257
SULT1B1	52	52	5	2	0.833333	0.9	2.49241
SWT1	33	33	18	1	1	1	1.41666
SYTL3	34	34	11	2	0.707317	0.793103	2.01398
TAPBP	81	81	30	2	0.829268	0.897059	6.03392
TASL	229	229	8	2	0.833819	0.90035	12.7409
TBC1D4	255	255	9	2	0.918033	0.955357	28.9926
TBC1D9	237	237	9	2	0.866873	0.923214	23.9246
TCF7	194	194	9	2	0.765027	0.846429	16.4689
TCL1A	31	31	4	2	0.969697	0.984375	6.85186
TCL6	260	260	9	2	0.933333	0.964286	34.8895
TCN1	252	252	8	2	0.89375	0.940559	18.5603
TCN2	112	112	12	2	0.821839	0.891608	24.0379
TDRD7	231	231	8	2	0.83871	0.903846	13.8811
TDRD9	261	261	8	2	0.919614	0.956294	25.8652
TENT5A	232	232	8	2	0.841176	0.905594	14.9828
TESC	12	12	28	2	0.75	0.833333	1.02811
TEX9	29	29	18	2	0.891892	0.939394	0.544286
TFEC	209	209	8	2	0.787879	0.865385	16.0999
TFRC	8	8	1	1	1	1	0.5
TGFA	54	54	26	2	0.909091	0.95	3.60298
THBD	90	90	30	2	0.894737	0.941176	6.66834
THBS1	19	19	15	2	0.787879	0.865385	3.79806
THEGL	33	33	18	1	1	1	1.41666
THEM4	213	213	9	2	0.806916	0.880357	18.9108
THEMIS	242	242	9	2	0.880503	0.932143	27.5819
THEMIS2	120	120	12	2	0.861446	0.91958	31.463
THNSL1	214	214	9	2	0.809249	0.882143	19.4274
TIFA	237	237	8	2	0.853731	0.914336	13.6076
TIGIT	217	217	9	2	0.816327	0.8875	19.8665
TIMP2	88	88	30	2	0.87931	0.931373	6.58205
TLE3	40	40	11	2	0.763158	0.844828	3.56203
TLR2	267	267	8	2	0.937705	0.966783	30.3064
TLR4	61	61	5	2	0.942029	0.969231	3.96234
TLR5	59	59	5	2	0.915493	0.953846	3.41485
TLR8	55	55	5	2	0.866667	0.923077	3.12807
TMCC3	233	233	8	2	0.843658	0.907343	13.8217
TMEM123	279	279	8	2	0.976109	0.987762	31.7751
TMEM140	110	110	12	2	0.8125	0.884615	13.7569
TMEM154	61	61	5	2	0.942029	0.969231	3.97891
TMEM167B	85	85	30	2	0.857143	0.916667	7.78259
TMEM168	208	208	9	2	0.795455	0.871429	21.1419
TMEM170B	244	244	8	2	0.871951	0.926573	16.9039
TMEM176A	3	3	6	1	1	1	0
TMEM176B	3	3	6	1	1	1	0
TMEM229B	20	20	20	2	0.916667	0.954545	1.18303
TMEM252	49	49	26	2	0.84507	0.908333	3.42024
TMEM255A	264	264	8	2	0.928571	0.961538	29.06
TMEM268	82	82	12	2	0.70098	0.786713	6.81715
TMEM272	17	17	20	2	0.814815	0.886364	0.703863
TMEM273	51	51	26	2	0.869565	0.925	3.76875
TMEM45B	52	52	26	2	0.882353	0.933333	3.62184
TMEM62	251	251	8	2	0.890966	0.938811	17.112
TMSB4Y	21	21	15	2	0.83871	0.903846	2.52339
TMTC1	261	261	8	2	0.919614	0.956294	25.8427
TNFAIP2	37	37	11	2	0.734177	0.818966	2.83844
TNFAIP3	71	71	30	2	0.766917	0.848039	5.94655
TNFAIP6	224	224	8	2	0.821839	0.891608	16.0566
TNFAIP8L2	7	7	7	2	0.769231	0.85	0.566667
TNFRSF10C	26	26	24	2	0.933333	0.964286	13.5746
TNFRSF17	227	227	9	2	0.840841	0.905357	20.1582
TNFSF10	275	275	8	2	0.962963	0.980769	31.4579
TNFSF13B	267	267	8	2	0.937705	0.966783	28.2007
TNFSF14	21	21	20	2	0.956522	0.977273	1.49105
TNS1	33	33	25	2	0.8	0.875	2.20025
TOR1B	238	238	8	2	0.856287	0.916084	14.1404
TPST1	23	23	15	2	0.896552	0.942308	3.69514
TRABD2A	225	225	9	2	0.835821	0.901786	21.2897
TRAC	26	26	4	2	0.842105	0.90625	3.32719
TRAF5	247	247	9	2	0.894569	0.941071	26.8663
TRAFD1	115	115	12	2	0.836257	0.902098	17.3445
TRANK1	20	20	20	2	0.916667	0.954545	1.26644
TRAT1	255	255	9	2	0.918033	0.955357	31.9339
TRAV14DV4	262	262	9	2	0.939597	0.967857	35.2841
TRBC1	24	24	4	2	0.8	0.875	1.50514
TRBC2	206	206	9	2	0.79096	0.867857	26.3172
TRBV2	253	253	9	2	0.912052	0.951786	33.6694
TRBV28	241	241	9	2	0.877743	0.930357	27.2181
TRDC	247	247	9	2	0.894569	0.941071	27.164
TRDV1	250	250	9	2	0.903226	0.946429	33.084
TRDV2	256	256	9	2	0.921053	0.957143	34.4664
TREM1	128	128	12	2	0.905063	0.947552	34.6768
TREML4	277	277	8	2	0.969492	0.984266	31.4115
TRERF1	235	235	9	2	0.861538	0.919643	20.7188
TRG-AS1	237	237	9	2	0.866873	0.923214	20.7322
TRGC2	240	240	9	2	0.875	0.928571	25.9824
TRGV4	270	270	9	2	0.965517	0.982143	38.1572
TRIB1	84	84	30	2	0.85	0.911765	7.20235
TRIB2	239	239	8	2	0.858859	0.917832	12.9273
TRIM10	39	39	25	2	0.897959	0.943182	3.07287
TRIM22	276	276	8	2	0.966216	0.982517	31.48
TRIM25	113	113	12	2	0.82659	0.895105	19.8147
TRIM38	262	262	8	2	0.922581	0.958042	21.8851
TRIM5	232	232	8	2	0.841176	0.905594	11.5669
TRIM6	245	245	8	2	0.874618	0.928322	23.6146
TRPM6	231	231	9	2	0.851064	0.9125	19.2629
TSC22D3	54	54	11	2	0.935484	0.965517	17.5075
TSPAN5	36	36	25	2	0.846154	0.909091	2.04412
TTC21A	110	110	12	2	0.8125	0.884615	17.1416
TTC26	260	260	8	2	0.916667	0.954545	21.9185
TTN	254	254	9	2	0.915033	0.953571	32.3852
TTTY14	86	86	30	2	0.864407	0.921569	6.58481
TUBA1A	128	128	12	2	0.905063	0.947552	34.6768
TUFT1	112	112	12	2	0.821839	0.891608	18.1214
TXK	247	247	9	2	0.894569	0.941071	27.6634
TYMP	60	60	12	2	0.632743	0.70979	4.69494
TYROBP	104	104	12	2	0.785714	0.863636	16.4182
U2AF1	88	88	30	2	0.87931	0.931373	6.54746
U2AF1L5	88	88	30	2	0.87931	0.931373	6.54746
UBB	18	18	28	1	1	1	9.27379
UBE2D1	259	259	8	2	0.913738	0.952797	20.9868
UBE2J1	270	270	8	2	0.94702	0.972028	27.64
UBE2L6	114	114	12	2	0.831395	0.898601	18.1473
UBR5-AS1	51	51	26	2	0.869565	0.925	3.22059
UBXN6	10	10	28	2	0.692308	0.777778	0.292832
UGCG	249	249	8	2	0.885449	0.935315	16.5078
UPP1	38	38	11	2	0.74359	0.827586	2.43803
USP18	96	96	12	2	0.752632	0.835664	7.77465
USP44	225	225	9	2	0.835821	0.901786	26.7452
USP53	237	237	9	2	0.866873	0.923214	24.5921
USPL1	89	89	30	2	0.886957	0.936275	7.45814
UTS2	218	218	9	2	0.818713	0.889286	20.8569
UTY	67	67	30	2	0.744526	0.828431	4.64625
VCAN	60	60	5	2	0.928571	0.961538	4.00012
VNN1	59	59	5	2	0.915493	0.953846	3.03024
VNN2	62	62	5	2	0.955882	0.976923	4.12588
VNN3	237	237	8	2	0.853731	0.914336	14.1492
VSIG1	237	237	9	2	0.866873	0.923214	26.1582
VSIR	97	97	12	2	0.756614	0.839161	20.0761
VWA3B	97	97	30	2	0.953271	0.97549	12.7522
WARS1	193	193	8	2	0.754617	0.837413	16.0572
WDFY1	246	246	8	2	0.877301	0.93007	17.444
WLS	213	213	9	2	0.806916	0.880357	19.9489
XACT	18	18	15	2	0.764706	0.846154	2.25081
XAF1	267	267	8	2	0.937705	0.966783	27.8725
XIST	20	20	20	2	0.916667	0.954545	1.26644
XKR3	59	59	26	2	0.983607	0.991667	4.83139
XRRA1	225	225	9	2	0.835821	0.901786	20.9985
YBX1	41	41	25	2	0.93617	0.965909	4.52624
YBX3	40	40	25	2	0.916667	0.954545	4.52749
YY1AP1	6	6	1	2	0.8	0.875	0
ZBP1	211	211	8	2	0.792244	0.868881	12.6674
ZBTB10	24	24	15	2	0.928571	0.961538	4.7113
ZC3HAV1	258	258	8	2	0.910828	0.951049	24.6245
ZCCHC2	244	244	8	2	0.871951	0.926573	18.4381
ZDHHC18	100	100	12	2	0.768817	0.84965	11.8626
ZFP30	223	223	9	2	0.830861	0.898214	16.0224
ZFP36	38	38	11	2	0.74359	0.827586	2.57593
ZFP37	235	235	9	2	0.861538	0.919643	28.6106
ZFP57	57	57	26	2	0.952381	0.975	4.68106
ZFY-AS1	85	85	30	2	0.857143	0.916667	6.71364
ZNF117	188	188	8	2	0.744792	0.828671	10.7515
ZNF154	219	219	9	2	0.821114	0.891071	16.6029
ZNF181	221	221	9	2	0.825959	0.894643	18.1801
ZNF204P	240	240	9	2	0.875	0.928571	28.4014
ZNF208	237	237	9	2	0.866873	0.923214	28.6405
ZNF215	19	19	15	2	0.787879	0.865385	2.2661
ZNF253	224	224	9	2	0.833333	0.9	18.6144
ZNF287	220	220	9	2	0.823529	0.892857	19.6973
ZNF354C	212	212	9	2	0.804598	0.878571	14.1637
ZNF429	52	52	26	2	0.882353	0.933333	3.23066
ZNF439	216	216	9	2	0.813953	0.885714	14.4901
ZNF441	48	48	26	2	0.833333	0.9	2.81036
ZNF483	235	235	9	2	0.861538	0.919643	20.1013
ZNF486	236	236	9	2	0.864198	0.921429	22.5659
ZNF496	55	55	11	2	0.95082	0.974138	17.2832
ZNF527	233	233	9	2	0.856269	0.916071	20.4884
ZNF540	228	228	9	2	0.843373	0.907143	20.4224
ZNF594	180	180	9	2	0.736842	0.821429	10.5006
ZNF600	237	237	9	2	0.866873	0.923214	22.7326
ZNF626	221	221	9	2	0.825959	0.894643	15.1903
ZNF658	231	231	9	2	0.851064	0.9125	24.521
ZNF681	215	215	9	2	0.811594	0.883929	14.9252
ZNF684	247	247	8	2	0.88	0.931818	14.1924
ZNF702P	51	51	26	2	0.869565	0.925	3.47864
ZNF727	273	273	9	2	0.97561	0.9875	38.4355
ZNF737	243	243	9	2	0.883281	0.933929	26.2634
ZNF781	236	236	9	2	0.864198	0.921429	29.6715
ZNF84	232	232	9	2	0.853659	0.914286	22.9007
ZNF860	184	184	9	2	0.744681	0.828571	14.9016
ZNF891	204	204	9	2	0.786517	0.864286	13.223
ZNFX1	133	133	12	2	0.934641	0.965035	35.5143

## Sheet: DENV
Id	numberofpairsincombinededgelist	Degree	modularity_class	Eccentricity	closnesscentrality	harmonicclosnesscentrality	betweenesscentrality
ABCA1	112	112	3	4	0.643875	0.740044	471.322
ABCB9	3	3	15	4	0.424242	0.488095	0
ABCD1	79	79	3	4	0.560794	0.65413	18.1399
ABLIM1	6	6	11	2	0.75	0.833333	1
ABTB2	111	111	3	4	0.607527	0.724189	32.0573
ACKR1	14	14	14	4	0.542373	0.60026	0.221145
ACSL1	1	1	13	1	1	1	0
ACTA2	105	105	3	4	0.624309	0.721608	37.8025
ACTRT1	4	4	14	5	0.460432	0.497917	0.2
ADIPOR1	26	26	14	4	0.576577	0.68099	2.53481
ADM	27	27	9	4	0.472803	0.521755	228.012
AHSP	45	45	14	3	0.761905	0.848958	44.4298
AIM2	82	82	17	4	0.579487	0.667035	195.241
ALAS2	40	40	14	4	0.695652	0.803385	20.2863
ALOX12	2	2	1	3	0.47619	0.55	0
ALPL	6	6	2	4	0.397059	0.490741	15.3333
ANKRD22	132	132	17	4	0.676647	0.78208	127.995
AP5B1	83	83	3	4	0.565	0.662242	13.0116
APOBEC3A	1	1	16	1	1	1	0
APOBR	37	37	17	5	0.47479	0.540339	1.35847
ASCC2	25	25	14	4	0.571429	0.673177	2.18818
ATF3	75	75	17	4	0.576531	0.655236	66.5031
ATF5	89	89	3	4	0.565	0.671091	10.4974
AXL	78	78	17	4	0.578005	0.660398	28.2387
AZU1	1	1	0	2	0.6	0.666667	0
BAMBI	10	10	3	5	0.434615	0.468068	0.903617
BATF2	134	134	17	4	0.682779	0.787242	127.724
BCL2A1	2	2	4	2	0.75	0.833333	0
BCL2L1	22	22	14	4	0.556522	0.64974	1.85734
BIN1	5	5	11	2	0.692308	0.777778	2.33333
BLVRA	4	4	17	5	0.376667	0.402802	0.074422
BLVRB	1	1	14	4	0.365714	0.389323	0
BMP2K	4	4	14	5	0.460432	0.497917	0.2
BPGM	23	23	14	4	0.561404	0.657552	2.02652
C12orf57	7	7	11	2	0.818182	0.888889	1.36667
C15orf48	143	143	17	4	0.710692	0.810103	212.123
C1QA	82	82	3	4	0.587013	0.670723	88.4344
C1QB	109	109	3	4	0.634831	0.731932	154.418
C1QC	129	129	3	4	0.678679	0.778392	412.912
C2	77	77	17	4	0.576531	0.658186	266.695
C3AR1	103	103	3	4	0.62259	0.71792	47.2356
C4BPA	5	5	2	3	0.509434	0.567901	76.8333
CA1	47	47	14	4	0.752941	0.858073	26.7405
CA2	9	9	9	4	0.452	0.47972	500.729
CA4	3	3	2	4	0.380282	0.435185	0
CACNA1A	67	67	17	4	0.562189	0.636062	19.8131
CAMK1D	2	2	12	1	1	1	1
CAMK2A	1	1	10	1	1	1	0
CASP5	101	101	3	4	0.620879	0.714233	75.8262
CCDC34	3	3	15	4	0.394366	0.452381	8.45
CCL2	127	127	17	4	0.668639	0.771755	114.659
CCL3	14	14	3	4	0.454728	0.489307	21.6296
CCL3L1	32	32	17	5	0.475789	0.533702	0.276085
CCL8	109	109	3	4	0.633053	0.731195	73.4712
CCN3	4	4	2	5	0.317647	0.411728	74
CCNA1	74	74	17	4	0.570707	0.650811	12.2951
CCNB2	11	11	15	3	0.583333	0.678571	35.2586
CCR1	76	76	3	5	0.560794	0.649853	34.3733
CCR7	7	7	11	2	0.818182	0.888889	3.83333
CCRL2	25	25	17	4	0.492375	0.53208	0.600497
CD27	5	5	15	3	0.482759	0.547619	33.2369
CD300C	67	67	3	4	0.533019	0.620944	5.66386
CD38	4	4	3	5	0.425612	0.451475	0.027584
CD3E	1	1	15	4	0.368421	0.395833	0
CD8A	7	7	2	5	0.421875	0.553086	5.81667
CDC20	9	9	15	3	0.571429	0.64881	15.03
CDC34	41	41	14	3	0.727273	0.817708	16.5083
CDC42EP2	13	13	9	4	0.455645	0.488569	19.1101
CDCA5	9	9	15	3	0.56	0.642857	24.9328
CDH23	79	79	3	4	0.555283	0.65118	9.69066
CDKN1A	90	90	3	4	0.575064	0.677729	16.9168
CEACAM1	120	120	3	4	0.658892	0.757743	140.878
CEACAM3	84	84	3	4	0.576531	0.669617	266.938
CENPM	7	7	15	4	0.474576	0.571429	1.50946
CHEK1	14	14	15	3	0.571429	0.708333	8.84665
CHMP5	1	1	5	2	0.666667	0.75	0
CLC	2	2	2	4	0.355263	0.401235	0
CLEC12A	1	1	17	5	0.284994	0.295501	0
CLEC1B	75	75	3	4	0.553922	0.644543	9.84913
CLEC4F	13	13	3	4	0.439689	0.475295	11.4259
CLEC5A	139	139	3	4	0.697531	0.799779	186.37
CMPK2	26	26	17	5	0.487069	0.531121	15.3537
CMTM5	2	2	1	3	0.526316	0.583333	1
CNTNAP2	1	1	2	5	0.380282	0.435802	0
CRIP2	1	1	7	2	0.666667	0.75	0
CSRNP1	99	99	3	4	0.602667	0.704277	244.154
CTSG	1	1	0	2	0.6	0.666667	0
CTSL	48	48	17	4	0.534279	0.592552	43.4112
CTTN	4	4	1	2	0.625	0.7	2.86905
CXCL10	87	87	17	4	0.599469	0.683997	283.768
CXCL11	1	1	17	6	0.32518	0.343584	0
CXCR3	2	2	15	4	0.337349	0.383929	0.5
CXCR5	6	6	11	2	0.75	0.833333	1.26667
CYBRD1	2	2	2	6	0.245455	0.308642	0
CYSTM1	87	87	3	4	0.582474	0.676991	196.631
DCAF12	41	41	14	3	0.727273	0.817708	19.2088
DDX58	109	109	3	4	0.631285	0.730457	332.913
DDX60	41	41	17	3	0.515982	0.570796	355.268
DEFA1	1	1	0	2	0.6	0.666667	0
DEFB1	138	138	17	4	0.69969	0.799041	194.103
DHRS9	2	2	17	5	0.381113	0.40354	0
DHX58	98	98	3	4	0.609164	0.704646	38.2303
DMTN	38	38	14	3	0.703297	0.794271	13.3591
DPM2	22	22	14	4	0.556522	0.64974	1.45794
DSC2	1	1	2	6	0.243243	0.290123	0
DUSP5	8	8	3	5	0.432122	0.462906	13.5448
DYNLT1	93	93	3	4	0.580977	0.685103	19.6544
ELAPOR1	1	1	12	2	0.666667	0.75	0
EPB42	46	46	14	3	0.771084	0.856771	46.3953
EPSTI1	49	49	17	4	0.525581	0.588864	79.1248
ERICH3	41	41	17	4	0.514806	0.570428	2.59136
ETV7	71	71	17	4	0.563591	0.642699	25.2663
FAM210B	34	34	14	4	0.653061	0.75651	6.1002
FBXO6	97	97	17	4	0.610811	0.703909	47.2962
FBXO7	41	41	14	3	0.727273	0.817708	20.0379
FCER2	3	3	11	2	0.6	0.666667	0.566667
FCGBP	1	1	12	2	0.666667	0.75	0
FCGR3B	5	5	17	4	0.397887	0.424041	226.633
FCRLA	5	5	2	6	0.325301	0.446914	1.16667
FECH	25	25	14	4	0.571429	0.673177	2.6641
FFAR2	72	72	3	4	0.558025	0.641593	274.206
FKBP8	21	21	14	3	0.571429	0.651042	185.508
FOLR3	5	5	3	5	0.417745	0.445206	0.111111
FOXC1	49	49	17	5	0.498896	0.575	2.01742
FRMD3	44	44	17	4	0.528037	0.582965	17.6442
FXYD6	4	4	17	5	0.376667	0.402802	0.074422
FZD2	88	88	3	4	0.590078	0.681416	20.1901
GALM	90	90	3	4	0.583979	0.682153	88.516
GAS6	99	99	3	4	0.602667	0.704277	192.559
GBP1	46	46	17	4	0.525581	0.58444	73.5882
GBP3	2	2	4	2	0.75	0.833333	0
GBP4	111	111	3	4	0.631285	0.733776	53.8621
GBP5	24	24	17	5	0.473795	0.518953	0.265148
GBP6	1	1	3	5	0.392361	0.414233	0
GCH1	13	13	9	4	0.432122	0.468658	1.55866
GIMAP2	3	3	4	1	1	1	0.5
GINS2	9	9	15	3	0.518519	0.619048	1.59676
GMPR	5	5	14	5	0.463768	0.505729	0.6
GNG11	4	4	1	3	0.5	0.633333	1.5
GPBAR1	87	87	3	4	0.570707	0.671091	15.8841
GPER1	2	2	3	5	0.40942	0.433038	0
GPR84	143	143	17	4	0.70625	0.808628	215.616
GRIN3A	33	33	17	5	0.471816	0.532227	0.456267
GYPC	46	46	14	3	0.771084	0.856771	22.8373
GZMA	6	6	2	5	0.415385	0.534568	5.81667
GZMK	6	6	2	5	0.415385	0.534568	3.98333
H2AC18	88	88	3	4	0.572152	0.673304	20.3607
H2AC20	81	81	3	4	0.562189	0.657817	16.9168
H2AC21	2	2	3	6	0.358162	0.38444	0
H2AJ	81	81	3	5	0.55122	0.652802	9.14555
H2BC21	79	79	3	5	0.553922	0.651327	12.7906
H2BC4	1	1	9	6	0.238397	0.245133	0
H2BC5	109	109	3	4	0.626039	0.728614	65.6407
H2BC6	2	2	17	4	0.411658	0.434366	0.483727
H3C4	83	83	3	4	0.565	0.662242	12.6637
H4C14	62	62	17	4	0.55122	0.622788	6.80506
H4C8	104	104	3	4	0.624309	0.720133	62.8136
HAGH	42	42	14	3	0.735632	0.825521	17.3096
HBD	26	26	14	4	0.603774	0.69401	1.40126
HBG1	47	47	14	3	0.780488	0.864583	27.1637
HBG2	47	47	14	3	0.780488	0.864583	27.1637
HBQ1	36	36	14	4	0.666667	0.772135	16.3472
HCAR3	2	2	9	5	0.335312	0.353024	0
HELZ2	95	95	3	4	0.583979	0.689528	21.6128
HEMGN	22	22	14	4	0.556522	0.64974	0.792336
HERC5	151	151	17	4	0.729032	0.827802	240.997
HERC6	94	94	17	4	0.604278	0.696534	70.9448
HES4	131	131	17	4	0.680723	0.78208	129.837
HESX1	66	66	17	4	0.563591	0.635324	313.329
HP	95	95	3	4	0.609164	0.700221	115.534
HPS1	4	4	14	5	0.460432	0.497917	0.2
HSH2D	90	90	3	5	0.565	0.673451	10.955
HSPA1B	91	91	3	4	0.594737	0.688053	297.373
HSPB1	31	31	3	5	0.490239	0.541445	1.68151
IDO1	110	110	3	4	0.634831	0.733407	111.131
IFI16	2	2	17	6	0.291237	0.304867	0
IFI27	19	19	3	5	0.46888	0.509366	51.6821
IFI27L1	3	3	15	4	0.424242	0.488095	0
IFI35	135	135	3	4	0.689024	0.790929	137.384
IFI44	98	98	17	4	0.619178	0.709071	616.791
IFI44L	156	156	17	4	0.740984	0.838864	356.524
IFI6	55	55	17	4	0.54067	0.606563	3.64127
IFIT1	152	152	17	4	0.731392	0.830015	282.919
IFIT2	95	95	17	4	0.612466	0.701696	915.685
IFIT3	164	164	17	4	0.758389	0.855826	442.275
IFIT5	41	41	17	4	0.513636	0.570059	72.3199
IL18R1	2	2	17	4	0.383701	0.406711	0.049171
IL1B	6	6	9	4	0.426415	0.455015	0.752635
IL1RN	127	127	3	4	0.666667	0.771018	155.809
IL27	46	46	17	5	0.495614	0.568363	1.51388
IL4I1	100	100	3	4	0.619178	0.712021	41.0894
IL7R	1	1	6	1	1	1	0
IRF7	92	92	17	4	0.590078	0.687684	50.0708
ISG15	156	156	17	4	0.738562	0.838127	374.904
ITGA2B	7	7	1	2	0.769231	0.85	25.5952
ITGB3	1	1	1	3	0.454545	0.5	0
ITLN1	13	13	14	4	0.537815	0.592448	0.192574
ITM2C	19	19	15	3	0.682927	0.815476	48.6292
JCHAIN	18	18	15	3	0.666667	0.797619	36.4923
JUP	123	123	17	4	0.658892	0.762168	123.575
KCND1	97	97	3	4	0.583979	0.692478	23.0186
KCTD14	49	49	17	5	0.5	0.575737	137.793
KDM5D	1	1	8	1	1	1	0
KIAA0319L	81	81	3	4	0.55665	0.654867	9.63227
KIAA1958	41	41	17	5	0.482906	0.552139	2.67522
KLC3	28	28	14	4	0.615385	0.709635	1.96329
KLF1	40	40	14	4	0.695652	0.803385	10.5397
KLRB1	6	6	2	5	0.415385	0.534568	4.58333
KRT1	47	47	14	4	0.752941	0.858073	22.9659
LAG3	72	72	3	5	0.543269	0.635103	529.157
LAMP3	133	133	17	4	0.680723	0.785029	184.73
LAP3	25	25	9	4	0.489177	0.530605	67.109
LEF1	4	4	2	5	0.402985	0.497531	0.333333
LGALS3BP	130	130	17	4	0.672619	0.777655	119.517
LHFPL2	81	81	3	4	0.558025	0.655605	9.08395
LILRA1	4	4	3	5	0.380471	0.410251	0
LMO2	2	2	17	6	0.291237	0.304867	0
LPAR6	2	2	17	4	0.383701	0.406711	0.049171
LRG1	3	3	3	5	0.396491	0.423599	0.014085
LRRN3	2	2	2	5	0.385714	0.454321	0
LTF	3	3	0	1	1	1	3
LY6E	68	68	17	4	0.562189	0.637537	10.1288
MAFB	18	18	9	4	0.437137	0.480457	4.32998
MAGED1	3	3	15	3	0.4	0.452381	6.95952
MAK	2	2	9	5	0.312586	0.324853	225
MARCO	111	111	3	4	0.638418	0.736357	75.5374
MBNL3	1	1	14	5	0.271186	0.28776	0
MCEMP1	93	93	3	5	0.585492	0.687463	31.1686
MDK	111	111	3	4	0.642045	0.737832	57.8359
MELK	9	9	15	3	0.518519	0.619048	2.75424
METTL7B	40	40	17	4	0.513636	0.568215	2.57574
MICAL2	14	14	14	4	0.542373	0.60026	0.670138
MME	1	1	2	5	0.380282	0.435802	0
MOV10	114	114	3	4	0.638418	0.740782	49.4604
MPO	29	29	17	5	0.465021	0.521165	0.193895
MS4A4A	19	19	17	4	0.484979	0.518068	1.76747
MT1A	41	41	17	5	0.48394	0.552876	4.04089
MT1E	3	3	3	5	0.420857	0.445575	0
MT1G	36	36	17	5	0.480851	0.543289	230.663
MT2A	157	157	17	4	0.740984	0.840339	266.717
MTHFD2	4	4	9	4	0.450199	0.470501	1.09004
MX1	91	91	17	4	0.599469	0.689897	40.6168
MX2	54	54	3	5	0.526807	0.59823	30.388
MYL4	44	44	14	4	0.727273	0.834635	92.2946
MYL9	2	2	1	3	0.47619	0.55	0
MYOF	57	57	17	4	0.541966	0.610251	128.87
MZB1	17	17	15	3	0.651163	0.779762	38.427
NAT8B	78	78	3	4	0.558025	0.65118	10.2634
NCAPG	8	8	15	4	0.482759	0.589286	1.0123
NCOA7	54	54	17	4	0.533019	0.600664	104.726
NCR3	5	5	11	2	0.692308	0.777778	1.26667
NECTIN2	35	35	17	5	0.47983	0.541077	0.364435
NELL2	17	17	2	4	0.6	0.774691	251.5
NET1	1	1	15	4	0.329412	0.363095	0
NEXN	112	112	3	4	0.643875	0.740044	110.987
NFIL3	25	25	9	4	0.47983	0.523968	316.258
NRGN	5	5	1	3	0.555556	0.7	4.57143
NTNG2	59	59	3	5	0.536817	0.611504	7.24401
OAS1	150	150	17	4	0.724359	0.824853	269.37
OAS2	135	135	17	4	0.682779	0.788717	209.029
OAS3	91	91	17	3	0.604278	0.69174	1260.3
OASL	154	154	17	4	0.733766	0.833702	263.675
ODAD4	42	42	14	4	0.711111	0.81901	14.4888
OLIG2	2	2	2	5	0.303371	0.362346	0
OSBP2	41	41	14	3	0.727273	0.817708	15.5968
OSM	32	32	9	4	0.489177	0.540929	322.622
OTOF	107	107	17	4	0.631285	0.727507	66.0892
P2RY14	1	1	16	1	1	1	0
P2RY6	105	105	3	4	0.627778	0.723083	48.0209
PARM1	3	3	15	3	0.41791	0.470238	10.4061
PARP10	90	90	3	4	0.576531	0.678466	17.7839
PARP12	98	98	3	4	0.588542	0.696165	21.5569
PARP9	11	11	17	5	0.425612	0.460693	0.398729
PDZK1IP1	40	40	14	4	0.695652	0.803385	9.69725
PF4V1	3	3	1	3	0.5	0.6	0.392857
PHGDH	8	8	15	3	0.571429	0.636905	74.6568
PHOSPHO1	46	46	14	3	0.771084	0.856771	30.0817
PI3	6	6	2	4	0.415385	0.509259	102.333
PI4K2B	1	1	5	2	0.666667	0.75	0
PID1	1	1	2	5	0.380282	0.435802	0
PKD2L1	127	127	3	4	0.674627	0.773968	90.6435
PLA2G4C	44	44	17	5	0.492375	0.563201	0.785825
PLAUR	60	60	3	4	0.544578	0.617257	257.694
PLEK2	13	13	14	4	0.537815	0.592448	0.192574
PLEKHA1	1	1	6	1	1	1	0
PLSCR1	7	7	17	5	0.40942	0.440044	448
POU2AF1	6	6	15	3	0.482759	0.559524	59.6141
PRSS33	5	5	2	3	0.509434	0.567901	79.5
PTGDR	2	2	2	5	0.385714	0.454321	0
RAB20	60	60	3	4	0.548544	0.618732	38.9147
RAB3IL1	31	31	14	4	0.633663	0.733073	1.87115
RAP1GAP	45	45	14	3	0.761905	0.848958	19.5936
RFLNB	2	2	7	1	1	1	1
RGL1	109	109	3	4	0.63662	0.73267	71.7981
RIN2	45	45	17	4	0.526807	0.583702	97.5883
RNASE1	9	9	3	5	0.43295	0.465118	0.903617
RNASE2	144	144	17	4	0.710692	0.811578	196.167
RNASE3	2	2	3	6	0.353678	0.379277	0.225
RNF10	37	37	14	4	0.673684	0.779948	8.17998
RPL13A	6	6	11	2	0.75	0.833333	2.83333
RPL4	9	9	2	5	0.435484	0.590123	10.15
RPLP0	3	3	2	5	0.397059	0.479012	0
RPS23	5	5	2	5	0.409091	0.516049	4.48333
RSAD2	109	109	17	4	0.638418	0.733407	752.543
RTN1	2	2	2	6	0.245455	0.308642	0
RTP4	141	141	17	4	0.697531	0.802729	170.419
RUNDC3A	49	49	14	3	0.8	0.880208	34.9011
S100A12	3	3	4	1	1	1	0.5
SAMD4A	132	132	17	4	0.682779	0.784292	162.021
SAMD9	14	14	17	4	0.481876	0.508481	0.901989
SAMD9L	12	12	17	5	0.453815	0.487242	0.1335
SAP30	1	1	13	1	1	1	0
SCO2	121	121	17	5	0.643875	0.754204	115.083
SDSL	107	107	3	4	0.631285	0.727507	47.5637
SELENBP1	46	46	14	4	0.744186	0.85026	23.4806
SEPTIN4	121	121	17	4	0.658892	0.759218	116.666
SERPING1	149	149	17	4	0.724359	0.823378	293.755
SESN3	38	38	14	4	0.680851	0.78776	7.46051
SH3BGRL2	5	5	1	2	0.666667	0.75	7.20238
SIGLEC1	61	61	17	4	0.547215	0.6191	50.4676
SIGLEC5	85	85	3	4	0.573604	0.669617	176.739
SIPA1L2	4	4	9	5	0.336811	0.358186	0
SLC22A15	3	3	9	5	0.334815	0.353761	0
SLC22A16	6	6	17	5	0.40942	0.438569	0.108333
SLC22A4	17	17	9	4	0.470833	0.505531	132.248
SLC25A39	46	46	14	3	0.771084	0.856771	25.4253
SLC26A8	11	11	3	5	0.458418	0.487979	0.245665
SLC2A5	2	2	15	4	0.341463	0.389881	0
SLC3A2	90	90	3	4	0.566416	0.673304	9.925
SLC4A1	40	40	14	4	0.695652	0.803385	20.9092
SLC6A12	89	89	3	4	0.573604	0.675516	17.6274
SLC6A8	46	46	14	4	0.744186	0.85026	20.8343
SNCA	47	47	14	3	0.780488	0.864583	51.1411
SOCS1	130	130	17	4	0.674627	0.778392	122.314
SOX12	1	1	10	1	1	1	0
SPATS2L	136	136	17	4	0.68693	0.791667	162.142
ST6GALNAC4	5	5	14	5	0.463768	0.505729	0.75
STAP1	2	2	5	1	1	1	1
STRADB	42	42	14	3	0.735632	0.825521	17.6237
TCN2	125	125	17	4	0.664706	0.76733	109.544
TDRD7	12	12	9	4	0.431298	0.466445	0.653921
TENT5A	105	105	3	4	0.619178	0.719764	51.6583
TESC	34	34	14	4	0.653061	0.75651	73.7081
TGM1	115	115	3	4	0.645714	0.745206	86.173
TGM2	2	2	14	4	0.369942	0.39974	63
TIMM10	131	131	3	4	0.682779	0.782817	439.775
TK1	9	9	15	4	0.491228	0.607143	0.974206
TLR4	12	12	9	4	0.430476	0.465708	0.77312
TLR7	20	20	9	4	0.486022	0.521018	22.6044
TMEM140	112	112	3	4	0.624309	0.733038	447.079
TMEM158	10	10	14	4	0.52459	0.56901	2.93415
TMEM255A	40	40	17	4	0.513636	0.568215	2.57574
TMEM268	72	72	3	4	0.545894	0.635693	9.97705
TMEM51	93	93	3	4	0.579487	0.684366	19.7182
TMOD1	34	34	14	4	0.653061	0.75651	3.58883
TMPRSS9	11	11	14	4	0.528926	0.576823	0.164796
TNFRSF13B	8	8	15	4	0.491228	0.592262	3.73626
TNFRSF17	13	13	15	3	0.583333	0.702381	30.8711
TNFSF10	109	109	3	4	0.629526	0.730457	117.183
TNFSF13B	106	106	3	4	0.599469	0.713127	51.3027
TNNT1	16	16	17	4	0.482906	0.512168	0.537526
TNS1	40	40	14	4	0.695652	0.803385	8.75754
TOP2A	7	7	15	4	0.474576	0.571429	0.448413
TOR1B	12	12	9	4	0.430476	0.465708	0.77312
TRAFD1	86	86	3	5	0.558025	0.663864	10.4472
TREM1	3	3	9	4	0.37604	0.399336	0
TREML1	3	3	1	2	0.588235	0.65	2.86905
TRIM10	15	15	14	4	0.547009	0.608073	1.17154
TRIM14	7	7	17	5	0.443137	0.471018	0.099168
TRIM5	8	8	9	4	0.420857	0.451327	0.63727
TRIM58	24	24	14	4	0.592593	0.678385	1.73169
TRIM6	12	12	17	5	0.460285	0.490929	13.1366
TSC22D1	2	2	9	4	0.386325	0.40708	0
TSPAN5	40	40	14	3	0.719101	0.809896	17.6915
TTC21A	86	86	3	4	0.570707	0.669617	18.9228
TUFT1	93	93	3	4	0.580977	0.685103	23.1367
TXLNGY	1	1	8	1	1	1	0
TXNDC12	6	6	2	5	0.415385	0.534568	1.16667
TYMS	10	10	15	4	0.509091	0.627976	4.58581
UBE2C	7	7	15	4	0.482759	0.574405	1.0715
UBQLNL	45	45	17	5	0.492375	0.564676	93.0642
UBXN6	40	40	14	3	0.719101	0.809896	18.017
UNC93B1	36	36	3	4	0.496703	0.55236	2.10429
USP18	16	16	17	4	0.48394	0.512906	0.316607
UTS2	1	1	2	5	0.380282	0.435802	0
VAMP5	118	118	3	4	0.645714	0.75	79.411
VENTX	1	1	7	2	0.666667	0.75	0
VPREB3	6	6	11	2	0.75	0.833333	1.26667
VWCE	40	40	14	4	0.695652	0.803385	61.9246
WARS1	95	95	3	4	0.583979	0.689528	22.8146
XAF1	141	141	17	4	0.70405	0.804941	286.652
YBX3	42	42	14	4	0.711111	0.81901	109.717
ZBP1	137	137	3	4	0.68693	0.793142	364.754
ZNF366	51	51	17	5	0.526807	0.593805	4.61184
ZNF438	79	79	3	4	0.570707	0.658555	13.3107
ZNF683	5	5	11	2	0.692308	0.777778	1.26667
ZNF684	2	2	17	4	0.383701	0.406711	0.049171

## Sheet: FLU
Id	numberofpairsincombinededgelist	Degree	modularity_class	Eccentricity	closnesscentrality	harmonicclosnesscentrality	betweenesscentrality
MARCKS	43	43	9	9	0.273455	0.337128	13.781
MGST1	60	60	7	9	0.288687	0.36058	4.79384
KLC3	76	76	0	12	0.206736	0.257599	117.829
S100A11	115	115	7	9	0.305926	0.385054	52.0956
S100A9	96	96	7	9	0.290323	0.375847	18.7628
MAD2L1	21	21	2	9	0.189017	0.212384	250.325
PRRG4	46	46	9	9	0.267577	0.33377	5.06251
KLRG1	14	14	13	8	0.225533	0.255065	189.201
ODF3B	53	53	7	9	0.287565	0.359581	7.63162
IKBIP	8	8	15	9	0.267631	0.314074	5.73148
NEAT1	51	51	9	8	0.274356	0.337267	2954.31
ALPL	157	157	9	8	0.286513	0.382056	100.54
ESPN	63	63	0	12	0.20632	0.252719	105.976
LPAR6	54	54	7	9	0.287689	0.360081	5.47209
AP5B1	63	63	7	9	0.297388	0.356718	8.5289
CXCR3	1	1	14	13	0.11466	0.121446	0
CAMK4	42	42	13	8	0.228082	0.263033	1555.9
CCNA1	191	191	4	9	0.301972	0.402964	103.609
PLA2G7	251	251	9	8	0.325116	0.453828	3508.86
FGD4	49	49	9	9	0.267685	0.334771	5.62107
ALDH5A1	1	1	0	13	0.171296	0.192178	0
PLXDC1	11	11	13	9	0.212001	0.237645	57.8149
FTX	2	2	5	2	0.625	0.7	0
CTSW	14	14	14	11	0.148462	0.16536	1315.07
UBASH3A	15	15	13	8	0.225839	0.256316	272.772
TTTY14	1	1	7	10	0.241042	0.269825	0
NT5C3A	154	154	4	9	0.290639	0.38288	167.539
EIF1AY	17	17	19	9	0.311215	0.356055	16629.6
DDX58	165	165	4	9	0.29469	0.388325	108.338
JAK2	17	17	20	9	0.263815	0.301539	208.845
PFKFB3	148	148	9	8	0.312236	0.401875	1983.81
MAL	46	46	13	9	0.20527	0.244793	52.5888
CCDC106	44	44	13	8	0.228121	0.263658	130.183
F5	220	220	9	8	0.323301	0.442692	2566.09
CLC	9	9	13	7	0.258842	0.287877	18908.6
LINC02470	136	136	9	9	0.273287	0.364947	26.5763
PLAUR	132	132	7	8	0.353409	0.43843	10111.4
ACTA2	151	151	4	9	0.294755	0.384246	26.7248
LCN2	16	16	7	10	0.261023	0.297165	3.22081
CD8B2	44	44	13	8	0.229616	0.266599	225.201
OSM	192	192	4	9	0.329948	0.429496	16147.9
TFEC	74	74	7	9	0.288937	0.367589	7.88474
KIR2DL4	2	2	16	10	0.211664	0.233281	0
TRIM22	173	173	4	9	0.300745	0.396208	88.5
GPAT3	80	80	7	8	0.298187	0.374068	11.7727
ATP9A	27	27	19	10	0.230569	0.269127	1.40667
USP41	187	187	4	9	0.30163	0.401338	92.0195
CCZ1B	116	116	9	9	0.273905	0.359616	9.68772
CEACAM1	160	160	4	9	0.299663	0.390952	33.4228
EPSTI1	184	184	4	9	0.300949	0.399336	269.973
NR4A1	9	9	19	10	0.293845	0.336067	28.8774
TLR10	7	7	13	8	0.243421	0.265743	93.9269
KEL	78	78	0	12	0.2068	0.25835	118.009
RBP7	86	86	7	8	0.297853	0.375131	13.8309
CXCR1	87	87	7	9	0.309912	0.378352	34.9354
GRINA	100	100	7	9	0.310924	0.383357	39.1543
ADGRE1	95	95	7	9	0.31107	0.382294	28.802
RPS6KA5	9	9	20	9	0.235004	0.274994	5.81884
GSTM2	2	2	13	9	0.210128	0.227674	0
ABLIM3	62	62	19	10	0.26518	0.327395	1730.28
OLIG2	12	12	13	8	0.233193	0.25976	235.863
IFIT1	203	203	4	9	0.302796	0.407469	365.556
HSPB1	151	151	4	9	0.291084	0.383005	40.674
SOCS1	8	8	19	10	0.292298	0.332813	58.0267
SPIB	15	15	13	9	0.200572	0.223565	15.0653
IMPA2	93	93	7	8	0.299057	0.378948	11.4047
XAF1	202	202	4	9	0.302727	0.407093	358.19
HBA1	10	10	0	12	0.194708	0.22177	562.888
CD164	17	17	20	9	0.265603	0.302615	239.126
VDR	94	94	7	8	0.298521	0.378385	36.5329
STXBP2	2	2	9	9	0.234962	0.271202	0
FBXO7	79	79	0	12	0.2068	0.2586	67.4399
ITPRIPL2	213	213	4	8	0.336704	0.448697	4039.05
BEND2	8	8	19	10	0.201208	0.225652	0
PLBD1	125	125	7	8	0.301221	0.39096	69.329
ASCC2	75	75	0	12	0.206704	0.257223	58.724
IL18RAP	24	24	20	8	0.275662	0.314428	25645.1
CXCL16	129	129	7	8	0.344364	0.433569	2547.74
SAMD4A	177	177	4	9	0.297388	0.393955	268.654
TMEM176A	126	126	7	8	0.343653	0.431755	2425.83
KLRC3	2	2	13	9	0.205651	0.224876	0
FAM102A	45	45	13	8	0.228709	0.26551	97.357
GIMAP4	7	7	16	9	0.267739	0.312098	3.01194
UTS2	26	26	19	10	0.312456	0.359252	28315.2
CARD6	76	76	7	9	0.289062	0.368339	8.1992
UPB1	12	12	6	8	0.248554	0.284773	14.6994
ALOX12	61	61	19	10	0.26087	0.323478	2006.04
UBE2C	23	23	2	9	0.189178	0.213573	197.488
ORM2	22	22	7	9	0.27837	0.327044	5.55239
MMD	41	41	19	10	0.235128	0.280851	88.3005
CCNL1	10	10	9	9	0.243644	0.280822	1.36905
VPREB3	21	21	13	8	0.220676	0.246118	2731.35
STRADB	65	65	0	12	0.206384	0.25347	47.1723
SH3GLB1	23	23	20	8	0.270128	0.310404	90.7035
CD160	28	28	14	10	0.173754	0.197413	3228.91
HBB	13	13	0	12	0.194936	0.223522	2096.88
TPM1	34	34	19	10	0.234838	0.278223	48.2622
EMILIN2	94	94	7	8	0.29899	0.379073	18.6116
SBDSP1	2	2	6	9	0.229734	0.249765	0
QPCT	205	205	9	8	0.322206	0.437124	2148.74
MT2A	197	197	4	8	0.332252	0.432861	11286.2
CD55	18	18	20	9	0.233193	0.265646	227.426
GNA15	22	22	7	8	0.28988	0.336917	13.3458
PYGL	90	90	7	8	0.298722	0.377571	8.59363
RNASE3	104	104	7	9	0.3205	0.399311	414.844
CCL2	182	182	4	9	0.3	0.398235	267.697
HP	120	120	7	9	0.320269	0.403064	508.78
PDZK1IP1	63	63	0	12	0.19958	0.24701	6.71849
NQO2	97	97	7	8	0.299191	0.380199	11.8927
IRF7	205	205	4	9	0.302934	0.40822	385.715
CLEC1B	62	62	19	10	0.284251	0.351344	3958.55
NBPF15	10	10	13	9	0.211496	0.235831	57.4473
ATP8B4	74	74	9	8	0.316089	0.391727	8686.29
HRH2	51	51	7	9	0.287503	0.358955	4.71154
TCEA3	11	11	13	9	0.18787	0.209686	0.166667
ADGRE2	75	75	7	8	0.297388	0.371315	8.43701
CSTA	154	154	7	9	0.338329	0.438662	1268.35
KRT23	125	125	9	8	0.284555	0.370044	51.796
BACH2	64	64	13	8	0.23053	0.274482	2061.38
SIGLEC10	94	94	7	8	0.29899	0.379073	23.1106
CD79B	20	20	13	9	0.200512	0.224904	344.742
CD3D	51	51	13	9	0.208483	0.249284	82.816
DPEP3	11	11	6	8	0.249251	0.2864	8.37956
PANX2	11	11	6	8	0.245983	0.280944	2.25182
TUFT1	26	26	7	8	0.290007	0.338231	19.49
SAMD9L	187	187	4	9	0.301699	0.401463	261.129
USP9Y	19	19	19	9	0.299797	0.350913	15341.6
CD1C	31	31	13	8	0.231572	0.267752	6900.78
OSCAR	69	69	7	8	0.29699	0.369063	6.60634
PNPLA7	44	44	13	8	0.219838	0.253411	125.601
SLC7A5	1	1	19	10	0.233972	0.253898	0
CABP5	29	29	19	10	0.24052	0.278422	81.8727
BST2	169	169	4	9	0.300474	0.394706	55.4655
CD24	3	3	9	8	0.250047	0.285004	4.6831
RTP4	173	173	4	9	0.295213	0.391328	154.163
HES4	171	171	4	9	0.300474	0.395207	153.808
BCL11B	63	63	13	8	0.23053	0.274231	2342.36
IFI30	86	86	4	9	0.283223	0.350174	7.26577
NBN	21	21	20	8	0.271394	0.308172	217.292
RP2	42	42	9	9	0.273343	0.336628	8.57276
SIRPD	104	104	7	9	0.311944	0.386047	46.8297
PILRA	109	109	7	8	0.3	0.384703	46.2165
SPARC	42	42	19	10	0.28048	0.342973	1265.65
TRIM21	157	157	4	9	0.297321	0.387674	26.0152
TRIM25	23	23	20	8	0.260972	0.301685	90.7035
TUBB2A	21	21	19	10	0.304666	0.350081	22230
CD36	89	89	20	8	0.318813	0.399922	21678.2
MARCO	226	226	7	8	0.357776	0.473647	4957.35
SMIM3	24	24	19	10	0.23045	0.268001	2.18241
TNFAIP2	79	79	7	8	0.297521	0.372566	17.3386
TLR5	131	131	9	8	0.28492	0.372296	62.1951
EPHB1	105	105	7	9	0.30912	0.382669	38.8356
IFIT3	205	205	4	9	0.302934	0.40822	391.551
ALDH1A1	3	3	13	7	0.257292	0.282622	199.827
FAS	126	126	9	8	0.284615	0.37042	45.2195
STX11	239	239	9	8	0.324878	0.449886	3073.35
CREB5	208	208	9	8	0.321972	0.437499	1757.32
BLK	14	14	13	9	0.200542	0.22319	23.0932
CTNNAL1	17	17	19	9	0.26236	0.289222	86249.2
CXCL10	180	180	4	9	0.298722	0.396057	240.23
C2orf88	16	16	19	11	0.224962	0.259853	1.30655
VNN1	87	87	9	8	0.314373	0.394905	13320.6
GPR160	114	114	9	9	0.273792	0.358866	10.7237
ZBTB16	2	2	13	9	0.191023	0.208291	0
CD8A	54	54	13	8	0.220384	0.261991	8835.99
DNAJA4	4	4	3	2	0.7	0.785714	0.166667
EGR1	5	5	4	8	0.269091	0.30818	1.80227
PLEK2	71	71	0	12	0.206576	0.255722	111.005
OLIG1	109	109	7	7	0.321506	0.397594	24083.7
TGFB1I1	31	31	19	10	0.276808	0.333613	61.5724
DEFB1	191	191	4	9	0.301972	0.402964	103.149
DDX60	171	171	4	9	0.300406	0.395081	182.537
NCAPG	59	59	2	9	0.190041	0.226649	3662.51
LDLR	47	47	4	10	0.234714	0.287124	0.0625
TRDV2	8	8	13	8	0.226454	0.251308	57.1988
FXYD6	72	72	7	9	0.28676	0.365299	8.59255
CCDC71L	19	19	7	9	0.282743	0.335608	3.42515
ELAPOR1	10	10	6	8	0.245938	0.280569	1.57444
GNLY	21	21	14	11	0.148578	0.167988	2558.39
LRRN3	43	43	13	8	0.23426	0.272147	2503.74
GAS2L1	25	25	19	10	0.270457	0.327881	68.0203
MNDA	94	94	7	9	0.290196	0.375096	18.2063
SIK1B	3	3	19	10	0.267577	0.297868	5.33033
PTGDR2	7	7	13	9	0.201391	0.224845	57.2988
EPB41L3	223	223	4	8	0.336364	0.451074	3871.36
FCRL1	7	7	13	9	0.20648	0.228429	25.7967
MIR646HG	10	10	6	8	0.249205	0.286024	5.73972
CD72	14	14	13	9	0.198214	0.22012	9.56863
NACC2	104	104	7	8	0.299797	0.383077	20.4465
LEF1	52	52	13	9	0.208516	0.249659	82.8352
TRAFD1	161	161	4	9	0.29973	0.391328	33.1867
OAS1	185	185	4	9	0.301426	0.400462	295.16
HEMGN	21	21	19	10	0.29899	0.35086	88065.6
COL17A1	116	116	7	9	0.312823	0.390552	61.5403
CDC20	60	60	2	9	0.190068	0.227024	4366.31
DOCK5	106	106	7	8	0.299326	0.382889	34.6595
THBS1	34	34	19	9	0.293457	0.352587	7055.77
GUCY1A1	17	17	19	11	0.225	0.260228	1.61315
HKDC1	52	52	13	8	0.229972	0.269727	712.173
SEPTIN4	154	154	4	9	0.29699	0.386298	32.2304
NIPAL2	55	55	9	9	0.27413	0.341633	13.9745
MMP25	157	157	9	8	0.28596	0.381418	114.221
ZNF200	8	8	13	8	0.269145	0.306797	241.988
VAMP5	54	54	4	10	0.235004	0.289752	0.744768
VSTM1	78	78	7	9	0.289188	0.36909	9.5974
NELL2	63	63	13	8	0.23049	0.274106	1945.18
CD7	60	60	13	8	0.265921	0.309585	67419.7
STAB1	129	129	4	8	0.316766	0.396845	10034
CLEC4F	178	178	4	9	0.301017	0.397959	89.4568
KCTD14	199	199	4	9	0.302521	0.405967	386.9
DSC2	179	179	9	8	0.312823	0.422992	1356.35
OTOF	151	151	4	9	0.295934	0.383733	18.0512
CASP1	170	170	4	9	0.3	0.39408	73.1511
STEAP4	199	199	9	8	0.321119	0.433933	1938.04
LY9	1	1	1	1	1	1	0
TSPAN9	14	14	19	11	0.224886	0.259102	0.697538
MIAT	4	4	13	10	0.175171	0.189218	0.083333
CHST13	2	2	7	9	0.238368	0.266194	0.828745
VENTX	2	2	13	9	0.215429	0.235843	36.0637
TOP2A	61	61	2	9	0.190096	0.227399	4378.58
CTTN	56	56	19	10	0.256302	0.316634	1269.57
TESC	64	64	0	12	0.206352	0.253094	46.6561
CARM1	64	64	0	12	0.206352	0.253094	49.3422
ZNF366	185	185	4	9	0.301494	0.400587	79.9554
CCL4	27	27	14	10	0.173732	0.197037	3106.42
MS4A14	244	244	7	8	0.360976	0.482155	5653.97
CTDSPL	64	64	19	10	0.256697	0.319637	1628.03
CLEC4A	105	105	7	8	0.29973	0.383202	26.846
KRT72	40	40	13	8	0.227965	0.262157	167.725
RGCC	17	17	13	9	0.188215	0.212476	2.24076
CMKLR1	2	2	16	10	0.211664	0.233281	0
RHOBTB1	32	32	19	10	0.276866	0.333989	68.1124
THEMIS2	170	170	7	9	0.342945	0.447709	2054.21
CD8B	33	33	13	8	0.23033	0.260739	5424.92
DDIT4	2	2	6	9	0.229734	0.249765	0
CDCA7	3	3	13	9	0.193886	0.211037	9.96853
IL32	9	9	2	8	0.212001	0.23103	3947.06
RNF10	60	60	0	12	0.206192	0.251468	49.1755
PARP11	8	8	16	9	0.268116	0.313224	4.01194
SIPA1L2	125	125	9	8	0.284555	0.370044	55.7341
ADTRP	56	56	13	8	0.228905	0.269164	1767.52
CARD16	158	158	4	9	0.299528	0.390202	32.9184
CPED1	235	235	4	8	0.338501	0.456517	4803.12
PNPT1	45	45	4	10	0.234631	0.286373	0.069349
LTBP3	10	10	13	9	0.20012	0.223072	163.223
PTER	18	18	13	9	0.188242	0.212852	2.59113
BPGM	60	60	0	11	0.247768	0.296183	25324.6
RRAS	219	219	4	8	0.336279	0.449948	3758.45
FRMD4A	1	1	12	11	0.19988	0.21611	0
RNF165	13	13	14	11	0.148313	0.164109	0.05
TDRD9	238	238	9	8	0.324088	0.448948	3102.87
HESX1	184	184	4	9	0.301426	0.400212	74.345
KIF4A	31	31	2	10	0.160656	0.187805	5.76846
LGALS2	207	207	7	9	0.349331	0.464663	3010.13
SESN3	4	4	3	2	0.7	0.785714	0.166667
PLSCR1	161	161	4	9	0.292105	0.381943	120.016
PLXDC2	92	92	7	8	0.29899	0.378572	11.3895
NPRL3	63	63	0	12	0.20632	0.252719	49.0394
NRBF2	135	135	9	8	0.285164	0.373798	75.536
TENT5C	24	24	19	10	0.308548	0.3572	41362.4
CD151	26	26	19	10	0.24039	0.277295	80.3694
RNF24	157	157	9	8	0.286328	0.381681	95.6869
SP100	162	162	4	9	0.299865	0.391828	41.6924
CEBPD	128	128	7	8	0.301426	0.392086	70.4591
PGLYRP1	21	21	7	9	0.285042	0.334267	865.062
NINJ1	22	22	7	9	0.276693	0.329252	2.72967
TREML1	56	56	19	10	0.280067	0.350741	4281.06
LGALS1	67	67	7	9	0.288437	0.364836	12.0866
SIGLEC5	100	100	7	9	0.311579	0.384421	33.6393
C1QC	224	224	4	8	0.336449	0.451137	4431.26
FHIT	37	37	13	8	0.227848	0.261031	172.929
CTSG	107	107	7	9	0.319042	0.398685	931.063
ETV7	129	129	4	9	0.294951	0.376225	39.9007
KIR2DL3	11	11	14	11	0.14828	0.163358	0.05
SELP	53	53	19	10	0.264128	0.32264	857.113
LY96	216	216	7	8	0.340491	0.462005	3809.86
MSRB1	263	263	7	8	0.356722	0.487005	8216.64
GZMH	31	31	14	10	0.173822	0.198539	4007.7
PI4K2B	17	17	20	8	0.269363	0.304305	210.056
ABCA1	181	181	9	8	0.320115	0.427739	1759.85
CAV1	36	36	2	10	0.160753	0.189682	4.41215
CAVIN2	48	48	19	9	0.251179	0.300167	3466.36
IL1RN	207	207	4	8	0.337215	0.446132	3956.79
FCER1A	10	10	13	8	0.223565	0.250232	1941.66
GP1BA	16	16	19	11	0.224962	0.259853	1.27568
MXRA7	19	19	7	9	0.279304	0.331441	2.02425
SLC51A	169	169	9	8	0.287255	0.386561	114.234
BCL6	182	182	9	8	0.32205	0.422733	3320.86
GASK1B	197	197	9	8	0.313633	0.428873	1548.49
IRF2	4	4	20	9	0.252368	0.2939	4.48845
UNC93B1	166	166	4	9	0.300271	0.39358	58.4586
H4C14	148	148	4	9	0.297853	0.385722	62.5928
EGF	34	34	19	10	0.27948	0.338844	136.913
NME1	30	30	2	10	0.160637	0.18743	4.30335
MANSC1	121	121	9	8	0.28413	0.368167	30.2297
TIMM10	148	148	4	9	0.298856	0.386448	24.3493
CPPED1	61	61	7	9	0.289314	0.361894	7.10466
TMPRSS9	76	76	0	12	0.206736	0.257599	114.813
FAM8A1	130	130	9	8	0.284859	0.371921	70.4774
MAP3K7CL	40	40	19	10	0.296924	0.352866	10927.9
RNF13	134	134	9	8	0.285103	0.373423	73.5647
GALNT14	146	146	9	9	0.275491	0.370565	28.7955
LRRK2	228	228	9	8	0.323772	0.445382	2555.97
THBD	11	11	9	8	0.260921	0.303731	1.37208
TBC1D8	238	238	7	8	0.360292	0.479778	5023.41
RNF149	155	155	9	8	0.284737	0.378415	100.731
CENPF	26	26	2	10	0.160559	0.185928	2.05541
MARCHF8	47	47	0	12	0.199014	0.240629	3.3851
SCGB3A1	199	199	4	9	0.302521	0.405967	105.934
KLRD1	28	28	14	11	0.148661	0.170365	16.5876
TLR7	143	143	4	9	0.293263	0.380066	15.3586
PCLAF	27	27	2	10	0.160656	0.186742	6.4233
BCL2L1	78	78	0	12	0.206768	0.258224	66.8787
TDP2	5	5	15	8	0.277731	0.316278	32.4221
ADGRG3	100	100	9	8	0.312896	0.388249	1638.72
OLFM4	131	131	9	9	0.274583	0.364872	16.0722
BATF3	177	177	4	9	0.299797	0.396608	66.8302
PTGDR	13	13	13	9	0.187923	0.210437	1331.26
GUSBP3	1	1	5	2	0.555556	0.6	0
GLDC	55	55	2	9	0.189933	0.225147	3572.93
GPBAR1	157	157	4	9	0.29417	0.385322	15.8577
CXCL1	152	152	9	8	0.284737	0.378002	92.4184
CREG1	208	208	4	8	0.336364	0.446945	4113.93
ZNF91	14	14	13	9	0.188136	0.21135	1.08213
FKBP8	28	28	0	13	0.172138	0.203689	2.45663
PTCRA	15	15	19	11	0.224924	0.259477	1.1582
FAM117B	11	11	13	9	0.200663	0.225236	3.36706
C17orf97	28	28	19	10	0.240477	0.278046	80.6048
BST1	96	96	7	8	0.299259	0.380074	19.6905
LIMS2	6	6	22	12	0.193043	0.206356	331.375
OR2W3	68	68	0	12	0.20648	0.254596	109.134
THEMIS	63	63	13	8	0.249391	0.29726	13171
TNFSF4	30	30	19	10	0.230689	0.270253	1.84909
TREML4	186	186	4	9	0.30163	0.401087	92.5256
MMP8	120	120	7	9	0.331343	0.419956	1724.24
H2AC8	2	2	7	10	0.247216	0.279045	0
FOS	203	203	9	8	0.321661	0.435747	2169.98
TRPM6	6	6	6	9	0.239914	0.272187	0
DOK3	48	48	7	9	0.287938	0.356075	4.39257
C16orf74	9	9	13	8	0.230849	0.256006	66.5315
MLKL	149	149	4	9	0.290957	0.382254	38.4158
CTSZ	100	100	7	8	0.299528	0.381575	15.4659
FHL2	31	31	19	10	0.230729	0.270628	1.65792
SPI1	123	123	7	9	0.344453	0.431743	26619
MYOF	221	221	4	8	0.336449	0.450699	3706.98
CDA	100	100	7	8	0.299528	0.381575	5214.57
SLFN5	12	12	13	8	0.260258	0.293721	1765.27
KIF1B	124	124	9	8	0.284494	0.369669	58.7673
ABCA13	124	124	7	9	0.313412	0.393555	69.5475
BBX	11	11	20	9	0.243867	0.285741	70.5886
RGS18	12	12	19	9	0.235502	0.26661	13.9159
CPA3	6	6	13	8	0.245349	0.269648	30183.2
GAS6	169	169	4	9	0.299326	0.39373	52.9118
CACNA1E	96	96	7	9	0.308476	0.379291	37.1211
HPSE	237	237	7	8	0.360878	0.480216	5382.66
CDKN1A	154	154	4	8	0.327998	0.415594	6282.66
H1	3	3	4	10	0.248879	0.284642	0
IL1RAP	122	122	9	9	0.274469	0.362307	12.7005
GZMA	21	21	14	11	0.148578	0.167988	2758.57
HAL	215	215	9	8	0.323144	0.441128	2238.41
HERC6	171	171	4	9	0.300406	0.395081	189.827
KCNE1	144	144	9	8	0.284251	0.374999	89.9345
IFIT5	170	170	4	9	0.297321	0.391115	125.709
LILRA1	91	91	7	8	0.298789	0.377947	13.0215
PPBP	32	32	19	10	0.279362	0.338093	137.06
POMZP3	7	7	19	9	0.248461	0.273212	0.233766
TGFA	128	128	9	9	0.274696	0.364309	14.1156
SYTL3	157	157	4	9	0.294235	0.385447	21.0723
EDAR	48	48	13	8	0.229774	0.2681	229.47
RNASE2	226	226	7	8	0.359126	0.475273	5759.95
HPGD	3	3	13	9	0.180659	0.198527	0.333333
EPPK1	14	14	13	9	0.212203	0.239147	534.876
BBOF1	71	71	0	12	0.206576	0.255722	111.028
OLR1	190	190	9	8	0.322753	0.425862	4554.11
TMEM121B	102	102	7	9	0.303901	0.37655	31.6645
IL15RA	93	93	7	9	0.308262	0.378164	40.8409
NUFIP2	5	5	5	1	1	1	7.5
HCAR2	108	108	7	8	0.336789	0.420018	1820.92
CLEC4E	188	188	7	9	0.341451	0.451675	3101.53
MKRN1	76	76	0	12	0.206736	0.257599	60.3223
AXL	185	185	4	9	0.301562	0.400712	91.3241
YBX3	81	81	0	12	0.206897	0.259476	69.2887
TLR1	219	219	9	8	0.323066	0.442004	2276.31
CCR3	2	2	13	9	0.1971	0.209502	30.8646
SMIM5	70	70	0	12	0.206544	0.255347	110.997
MS4A4A	232	232	4	8	0.341189	0.457055	4204.66
AIM2	156	156	4	9	0.296132	0.386973	136.371
IRF2BPL	134	134	9	8	0.285103	0.373423	70.7435
CEACAM6	154	154	9	9	0.304805	0.399806	6079.31
P2RY14	130	130	9	8	0.31866	0.40469	48974.7
BTNL8	94	94	7	9	0.303417	0.373672	34.0394
MICAL2	55	55	0	12	0.199342	0.244007	24.6489
TREM1	109	109	7	8	0.340578	0.42406	2120.38
ADGRG1	30	30	14	10	0.1738	0.198163	3634.85
DHRS3	59	59	13	8	0.228827	0.269664	1849.41
CCR1	225	225	4	8	0.338845	0.453014	4333.54
IGHV3	11	11	2	9	0.188749	0.208631	144.917
TMEM158	58	58	19	10	0.278894	0.344875	2344.4
ACSL1	246	246	9	8	0.325434	0.452514	3381.37
CSF3R	256	256	9	8	0.326471	0.456643	3929.2
HCK	123	123	7	8	0.300949	0.389959	63.5823
ICOS	3	3	13	9	0.193886	0.211037	9.96853
CRACDL	165	165	9	8	0.306983	0.406493	7339.79
SHCBP1	26	26	2	10	0.160559	0.185928	2.88973
EOMES	15	15	14	11	0.148445	0.165486	0.475479
CDCA7L	11	11	13	9	0.198008	0.218619	9.32193
DIPK1B	42	42	13	8	0.228278	0.263658	182.392
EBF1	18	18	13	9	0.200542	0.224316	39.9052
FOSL1	23	23	7	9	0.294951	0.344765	181.146
TOX2	3	3	19	9	0.210161	0.228049	0
PARP14	188	188	4	9	0.301767	0.401838	305.035
LAP3	184	184	4	9	0.301426	0.400212	250.464
ZWINT	53	53	2	9	0.189879	0.224396	3440.9
PDGFRB	16	16	14	11	0.148363	0.165235	2.08333
CD96	10	10	13	9	0.20015	0.222859	1.10916
HK2	126	126	9	8	0.284615	0.37042	58.065
PGGHG	10	10	19	9	0.248647	0.274463	328.963
APOL6	91	91	4	9	0.27837	0.347922	6.32004
IGHA1	35	35	2	10	0.160734	0.189307	7.21505
MELK	56	56	2	9	0.190068	0.22596	3316.04
IFI44L	194	194	4	9	0.302178	0.40409	303.648
CEBPE	6	6	7	9	0.23987	0.271361	0.599501
CCL5	7	7	14	12	0.129496	0.141583	2661.72
CD3G	11	11	13	9	0.200361	0.224323	3.47881
VCAN	266	266	9	8	0.327434	0.460647	4221.05
PGAP1	61	61	4	10	0.235294	0.292379	1.48301
XIST	30	30	2	10	0.160637	0.18743	4.00372
PRKY	19	19	19	9	0.311433	0.356931	17688.2
SBF2	133	133	9	9	0.299595	0.391072	874.588
MAK	138	138	9	9	0.274923	0.367374	19.5376
AKR1C3	6	6	15	8	0.279421	0.320732	32.4221
CHI3L2	1	1	1	1	1	1	0
CD38	30	30	2	8	0.23029	0.257815	99005.8
TK1	54	54	2	9	0.189906	0.224772	3885.88
SERPING1	126	126	4	9	0.284981	0.363287	55.6188
MIR223HG	34	34	9	9	0.272337	0.332374	10.5751
FCGR3A	185	185	7	9	0.345078	0.454278	2783.48
FAM72B	10	10	2	8	0.217968	0.238244	25519.3
KRT73	46	46	13	8	0.229734	0.267475	229.185
ABCC3	18	18	19	10	0.240043	0.274292	35.782
CPEB4	17	17	20	8	0.270237	0.305519	211.332
AOC1	161	161	9	8	0.285592	0.382006	105.96
GMPR	66	66	0	12	0.19958	0.247761	7.55309
FCRL5	39	39	2	10	0.160811	0.190808	10.6079
SIRPA	77	77	7	8	0.297388	0.371816	10.4731
MZB1	65	65	2	10	0.161396	0.201006	106.356
ASIC1	53	53	13	8	0.229972	0.269977	235.104
C1orf21	15	15	14	10	0.173325	0.191907	497.471
LGALS3BP	150	150	4	9	0.288249	0.375299	92.2438
SETBP1	1	1	10	2	0.666667	0.75	0
TGM1	186	186	4	9	0.301562	0.400962	85.6442
MAFB	159	159	4	8	0.32897	0.418347	6407.91
SCO2	225	225	4	8	0.341014	0.455053	5445.3
BLVRB	67	67	0	12	0.206448	0.25422	55.7781
RSPH9	108	108	7	9	0.309336	0.383795	49.2833
PLEKHF1	3	3	14	12	0.129408	0.139706	0.25
HMMR	22	22	2	9	0.189151	0.213198	251.977
LMNB1	3	3	2	8	0.224205	0.234754	1187.41
LILRB1	75	75	7	9	0.288937	0.367839	11.3713
ROPN1L	4	4	12	9	0.267954	0.311459	332.27
ODAD4	79	79	0	12	0.206832	0.258725	115.183
NRIP1	4	4	20	9	0.234796	0.273117	5.24182
FER1L4	39	39	2	10	0.160811	0.190808	10.7524
CD27	8	8	22	12	0.193099	0.207106	997.15
STK3	120	120	9	9	0.27413	0.361118	11.8258
CD248	45	45	13	8	0.228317	0.264534	135.689
ABCB1	12	12	13	9	0.212034	0.238021	404.411
SMOX	54	54	0	12	0.199312	0.243632	33.4787
LINC02555	180	180	4	9	0.301153	0.39871	66.4693
CCL3	5	5	4	9	0.256796	0.298042	0
IL1R1	126	126	9	8	0.279597	0.364766	49.188
TRGC2	13	13	14	9	0.208288	0.231041	49172
CXCR2P1	151	151	4	9	0.293586	0.382694	21.4914
TRIB2	27	27	13	8	0.274413	0.320436	43619.7
HLX	114	114	7	9	0.321429	0.403315	627.12
FGL2	83	83	7	9	0.289502	0.370967	15.0247
GPR162	6	6	7	9	0.23987	0.271361	1.23808
KIAA0319L	129	129	4	9	0.294625	0.375725	18.4495
TTC7B	29	29	19	10	0.254539	0.305373	10.0252
SOD2	180	180	9	8	0.306418	0.410397	17463.4
CLEC5A	104	104	7	9	0.309049	0.382294	39.1158
TEKT4P2	11	11	13	8	0.216691	0.235927	1815.42
FCER2	24	24	13	8	0.206993	0.231753	1504.28
CYBRD1	112	112	7	8	0.300677	0.386705	7041.73
FAM126B	111	111	9	8	0.283706	0.364789	65.0816
H2BC21	182	182	4	9	0.313929	0.418555	11227.4
CYP27A1	12	12	6	8	0.251558	0.286284	19.0141
NT5M	2	2	19	11	0.195451	0.217376	0
FCRLA	18	18	13	9	0.200633	0.224566	41.1072
CCN3	14	14	6	8	0.248647	0.285524	15.8701
KDM5D	18	18	19	9	0.311288	0.35643	16496.8
SCML4	13	13	13	9	0.187897	0.210312	0.555588
NIBAN1	157	157	9	8	0.286513	0.382056	99.4866
CD177	74	74	7	9	0.327032	0.391558	18739.8
LAIR2	6	6	13	8	0.242226	0.27084	4184.06
SLC22A4	30	30	20	7	0.308476	0.363172	4322.36
CTSL	163	163	4	9	0.29456	0.387574	132.806
F2RL1	119	119	9	9	0.274074	0.360743	11.3172
FAM20A	135	135	7	8	0.345525	0.436635	3805.18
NEXN	170	170	4	9	0.296	0.391378	205.128
HCG27	119	119	9	8	0.28419	0.367792	65.2901
CLEC7A	179	179	9	8	0.31639	0.424611	1634.98
KCNH3	11	11	6	8	0.249251	0.2864	12.8309
COCH	1	1	10	2	0.666667	0.75	0
TMIGD2	29	29	13	8	0.227537	0.258028	168.335
CHST15	104	104	7	8	0.299663	0.382827	26.2875
SIAH2	64	64	0	12	0.199521	0.24701	6.80972
SMIM24	72	72	0	12	0.206608	0.256097	104.243
SLC16A6	23	23	7	8	0.289943	0.337293	15.2827
TSC22D3	12	12	9	9	0.243867	0.281948	12.4623
ISG15	205	205	4	9	0.302934	0.40822	387.34
SH2D1B	27	27	14	10	0.173732	0.197037	3065.71
ARG1	23	23	20	8	0.283284	0.327589	2001.93
C2	79	79	7	9	0.289251	0.369466	10.6839
STAT2	182	182	4	9	0.301357	0.399586	93.4862
TWF1	2	2	6	10	0.224205	0.245594	0
PRSS23	26	26	14	10	0.173709	0.196662	3531.92
IL27	185	185	4	9	0.301562	0.400712	92.1179
LY6E	170	170	4	9	0.300542	0.395081	92.4042
CSGALNACT1	1	1	13	10	0.166771	0.179885	0
FAM157C	121	121	9	8	0.28419	0.368292	35.9889
ID3	57	57	13	8	0.230171	0.271604	1440.1
FAM118A	18	18	13	8	0.217186	0.241461	348.466
NTNG2	65	65	4	9	0.276866	0.338162	3.88423
NTSR1	2	2	8	1	1	1	0
CLEC1A	154	154	9	8	0.286021	0.380304	86.606
MCM4	64	64	2	9	0.190286	0.228963	5475.22
RAB33B	87	87	9	9	0.272281	0.348731	6.39651
MCOLN2	1	1	14	13	0.11466	0.121446	0
IFI27	192	192	4	9	0.301494	0.402339	295.981
H2BC5	145	145	4	9	0.307977	0.400212	5794.87
B4GALT5	228	228	9	8	0.324009	0.445757	2410.53
SPATS2L	163	163	4	9	0.289125	0.380304	97.119
TPX2	29	29	2	10	0.160617	0.187055	3.32498
BPI	117	117	7	9	0.319118	0.400437	453.52
MYD88	111	111	7	9	0.311944	0.387862	51.9718
CAMP	87	87	7	9	0.318356	0.391928	714.628
H2AC6	44	44	20	8	0.296725	0.354382	24387.2
SHTN1	202	202	7	8	0.356245	0.466264	3855.55
DHX58	168	168	4	9	0.297189	0.390364	122.209
ADCY3	108	108	9	9	0.27368	0.357051	10.1249
SLPI	9	9	7	10	0.260716	0.294663	0.33109
NCF1B	79	79	7	9	0.289251	0.369466	13.7069
AHSP	59	59	0	11	0.240087	0.289897	12913.7
CXCR2	207	207	9	8	0.320655	0.435122	2065.83
TMEM260	10	10	20	9	0.235045	0.275369	5.81884
GPR146	67	67	0	12	0.206448	0.25422	103.776
SPTLC2	210	210	4	8	0.333083	0.44214	3698.05
ST8SIA4	5	5	13	9	0.250989	0.290957	99.3772
PPP1R15A	11	11	19	10	0.263762	0.29983	42.2211
TNFRSF1A	101	101	7	8	0.29946	0.3817	21.3875
KIAA1958	176	176	4	9	0.312749	0.410659	2305.54
CASP5	232	232	7	8	0.35845	0.476712	5141.42
FAM210B	64	64	0	12	0.206352	0.253094	48.103
CTSA	4	4	7	10	0.249766	0.284412	2.4553
MT1E	25	25	19	9	0.305365	0.352954	36259
OPLAH	2	2	8	1	1	1	0
SIGLEC1	100	100	4	9	0.278486	0.350612	34.5483
IGF1R	7	7	20	9	0.243688	0.28424	6.01657
S100B	2	2	13	9	0.210128	0.227674	0
RNF19B	129	129	7	8	0.344364	0.433569	2600.7
GYPC	84	84	0	12	0.206993	0.260602	69.9369
LST1	115	115	7	8	0.300406	0.386956	59.0742
IGKV1D	30	30	2	9	0.189366	0.216201	256.398
HJURP	31	31	2	10	0.160656	0.187805	2.50646
GYG1	84	84	7	9	0.300745	0.370682	24.7333
GLT1D1	72	72	7	8	0.296461	0.369	23.0027
RAB24	101	101	7	9	0.311579	0.384671	30.6182
ATXN7	16	16	20	9	0.24409	0.287618	92.2137
C3AR1	168	168	4	9	0.29792	0.391553	110.602
GCH1	19	19	20	8	0.271228	0.307296	213.242
FMNL2	94	94	7	9	0.290196	0.375096	18.3119
RNF11	4	4	3	2	0.7	0.785714	0.166667
B3GNT5	175	175	9	8	0.320655	0.418729	3592.8
GLRX5	49	49	0	12	0.205841	0.247339	27.1062
RPS4Y1	15	15	19	9	0.268278	0.296007	6446.36
IL2RB	20	20	14	11	0.148429	0.166737	3.23449
NIBAN3	34	34	13	8	0.23426	0.269573	8675.81
PI3	4	4	7	9	0.239611	0.27011	0
TBX21	10	10	14	11	0.148264	0.162983	0
MPO	115	115	7	9	0.319042	0.399811	425.568
NCAPG2	26	26	2	9	0.189258	0.214699	254.24
CYSTM1	118	118	7	9	0.348235	0.430097	29353.3
GPR84	128	128	7	8	0.344899	0.434007	3158.01
KREMEN1	121	121	9	8	0.28419	0.368292	35.9889
KIF18B	27	27	2	10	0.160579	0.186304	2.34076
C9orf78	68	68	0	12	0.20648	0.254596	52.4764
ELANE	105	105	7	9	0.315939	0.393179	404.517
FCGR1A	72	72	7	9	0.288812	0.366838	9.88235
WLS	122	122	9	9	0.274469	0.362307	10.1745
SORL1	154	154	9	8	0.286328	0.38093	100.152
TLCD4	13	13	19	10	0.254977	0.28172	242.402
MASTL	12	12	19	10	0.294235	0.337568	61.0007
ASGR2	225	225	7	8	0.35845	0.474147	4935.02
TCN2	203	203	4	8	0.336874	0.44398	3265.68
CXCR5	14	14	13	9	0.198214	0.22012	9.56863
GP9	24	24	19	10	0.240303	0.276545	79.8618
IFI16	172	172	4	9	0.300677	0.395832	80.4101
DENND5B	22	22	2	9	0.189151	0.213198	251.742
DYSF	232	232	7	8	0.359708	0.477463	6315
HBG2	2	2	0	13	0.163175	0.177969	0
GP1BB	35	35	19	10	0.234838	0.278474	80.6848
XK	64	64	0	11	0.213838	0.263655	2780.39
NT5E	13	13	13	9	0.212068	0.238396	404.494
HCAR3	91	91	9	8	0.282323	0.356906	28.4206
ZMYND15	105	105	7	9	0.30912	0.382669	39.0841
FAXDC2	62	62	0	12	0.206288	0.252344	19.5217
HBA2	9	9	0	12	0.19468	0.221395	0.125
IFITM3	209	209	4	9	0.30321	0.409721	395.152
ANKRD22	181	181	4	9	0.298789	0.396433	234.301
TMEM40	23	23	19	10	0.275662	0.329109	17.7572
H2BC12	98	98	7	9	0.303763	0.378252	27.1074
CLIC3	17	17	14	11	0.148512	0.166487	1321.54
CRYZ	13	13	13	8	0.225381	0.254314	270.778
AURKB	23	23	2	10	0.160501	0.184802	2.08605
PRICKLE1	5	5	13	8	0.221557	0.243288	27.9159
GZMK	58	58	13	8	0.234177	0.276131	7311.52
TRIB1	33	33	20	7	0.308262	0.363547	5465.12
SELENBP1	74	74	0	11	0.240781	0.295653	18324.1
GPA33	41	41	13	8	0.22816	0.263033	134.092
TTC21A	165	165	4	9	0.29772	0.390427	37.2673
ANPEP	107	107	7	7	0.320192	0.394966	26982.5
GATA2	5	5	13	8	0.243332	0.264993	93.9269
TRIM69	170	170	4	9	0.297321	0.391115	133.708
EPHB4	10	10	6	8	0.249205	0.286024	12.0614
CLU	30	30	19	10	0.277905	0.334464	136.107
HIP1	3	3	6	10	0.193605	0.210195	0
ZBP1	188	188	4	9	0.301767	0.401838	267.325
HBM	8	8	0	12	0.194651	0.22102	0
TUBBP5	7	7	3	1	1	1	2.83333
DMTN	64	64	0	11	0.213804	0.26353	2868.69
CD163	89	89	7	9	0.302934	0.371545	18.6436
TLR4	215	215	9	8	0.323144	0.441128	2344
TMEM51	169	169	4	9	0.299259	0.393605	76.4977
KIF11	30	30	2	10	0.160637	0.18743	1.44389
IGLL5	23	23	2	10	0.160482	0.184677	4.73458
DEFA4	11	11	7	10	0.260818	0.295414	0.254167
KIFC1	27	27	2	10	0.160579	0.186304	1.44476
TGFBI	1	1	9	10	0.220311	0.248479	0
H3C4	7	7	4	9	0.257541	0.300357	0
S1PR5	28	28	14	11	0.148661	0.170365	18.6614
SLC24A4	217	217	4	8	0.336194	0.449323	3600.37
MYBL1	3	3	13	9	0.208353	0.228915	621.817
PYHIN1	2	2	16	10	0.211664	0.233281	0
H2AC11	12	12	19	9	0.235502	0.26661	13.0506
PADI4	80	80	7	8	0.297787	0.373317	2086.28
SLC4A1	61	61	0	12	0.199551	0.246384	70.9896
CSF2RB	57	57	9	8	0.3067	0.37879	1099.9
HBG1	3	3	0	13	0.163195	0.178345	0.5
SLC2A5	35	35	2	10	0.160734	0.189307	3.34874
NUDT16L2P	112	112	7	9	0.309623	0.385297	45.1502
FRMD3	180	180	4	9	0.307337	0.40822	6977.58
CENPK	20	20	13	8	0.227576	0.261459	5060.59
NECAB2	6	6	7	9	0.23987	0.271361	0.599501
BCORP1	10	10	19	10	0.255809	0.280218	12.0383
MYBPH	157	157	9	8	0.285042	0.379879	97.4945
CST3	91	91	7	9	0.290007	0.37397	17.7573
GBP3	21	21	20	9	0.285592	0.331782	10175.1
MAPK14	86	86	9	8	0.282024	0.355029	26.1852
NPL	95	95	7	8	0.298722	0.378823	10.9725
CKAP4	102	102	7	8	0.299528	0.382076	35.6238
FAM225A	193	193	4	9	0.302109	0.403715	103.73
CDK5R1	2	2	6	10	0.224205	0.245594	0
NRG1	150	150	7	8	0.303486	0.40122	6267.72
ANKRD9	64	64	0	11	0.213838	0.263655	2770.9
RGS1	177	177	4	9	0.316014	0.415464	2561.84
CREBRF	12	12	20	9	0.243911	0.286117	71.422
SLC2A3	166	166	9	8	0.318052	0.410784	6235.09
TSHZ3	123	123	9	9	0.274526	0.362682	12.0756
CEACAM8	111	111	7	9	0.316465	0.395557	557.249
ALPK1	140	140	9	8	0.285469	0.375675	83.4403
TRIM6	175	175	4	9	0.300745	0.396708	69.7896
HSPA1B	138	138	4	9	0.311433	0.399874	7530.03
DHRS9	135	135	4	9	0.294755	0.37909	15.5027
TDRD7	131	131	4	9	0.29443	0.377464	14.5789
ITPRIP	120	120	7	9	0.344364	0.431023	12444.1
APOBEC3A	140	140	4	9	0.320269	0.405272	5104.51
CA4	10	10	6	8	0.254393	0.290613	9.51315
TNIK	2	2	5	2	0.625	0.7	0
KCNMA1	119	119	7	9	0.313043	0.391678	68.8645
TNFSF13B	204	204	4	8	0.33275	0.443799	4964.61
SLC25A37	5	5	12	10	0.249766	0.28251	2786.94
LIMK2	76	76	9	8	0.28125	0.3509	27.8271
MPZL1	99	99	9	8	0.282803	0.359909	27.542
KIAA1671	17	17	13	8	0.238496	0.268069	926.121
ZNF292	9	9	20	9	0.235004	0.274994	6.29737
AFF3	34	34	13	8	0.238112	0.275252	8568.4
EGLN1	122	122	9	9	0.274469	0.362307	12.247
ADGRE4P	41	41	13	8	0.22816	0.263033	552.196
NCF2	88	88	7	8	0.298588	0.376821	40.2034
MATK	8	8	22	12	0.193099	0.207106	997.15
CD93	118	118	7	8	0.300609	0.388082	54.0782
CR2	38	38	13	8	0.237137	0.274135	6672.09
GFI1B	7	7	0	11	0.201604	0.232149	35.6561
ITGA2B	55	55	19	10	0.286082	0.351819	4515.89
EPB42	64	64	0	12	0.19967	0.247636	176.75
LINC01001	122	122	9	8	0.284251	0.368668	35.9972
FCAR	8	8	9	8	0.260767	0.302605	0.610272
ETNK1	7	7	13	8	0.243421	0.265743	93.9269
IL7R	68	68	13	8	0.230729	0.276108	2870.44
S1PR3	120	120	7	8	0.300271	0.388144	51.812
CD22	5	5	13	9	0.18969	0.204132	51.6173
TRDC	4	4	13	9	0.194169	0.212287	1
KLRB1	20	20	13	8	0.236422	0.265364	27348.1
H4C4	28	28	20	8	0.275207	0.315129	968.295
CLDN5	2	2	19	11	0.195451	0.217376	0
LAMP3	164	164	4	9	0.297654	0.390051	149.413
IGHD	5	5	13	9	0.183699	0.197991	6.4346
SPATA20	6	6	22	12	0.193043	0.206356	0.575
SCML1	19	19	13	9	0.20012	0.227801	2847.5
MTMR11	27	27	4	8	0.279011	0.333654	2.11203
FAM13A	48	48	4	10	0.234755	0.287499	0.085106
PLB1	104	104	9	9	0.268332	0.349646	23.0453
PLXNC1	110	110	9	8	0.283465	0.364038	59.0368
TNFRSF25	51	51	13	8	0.229933	0.269351	155.786
RPS26	42	42	2	10	0.16087	0.191934	11.7987
RNF144B	87	87	7	8	0.298053	0.375569	8.3493
PHOSPHO1	40	40	0	12	0.198776	0.237876	11.442
OXER1	9	9	6	8	0.249158	0.285649	11.8454
CCNA2	25	25	2	9	0.189258	0.214449	5562.77
TRGC1	3	3	14	12	0.129433	0.139957	0
H4C8	172	172	4	9	0.306277	0.404641	6443.39
NAGK	82	82	7	9	0.289439	0.370592	14.6401
TTC38	4	4	16	10	0.211731	0.234032	1.5
DTX3L	126	126	4	9	0.28676	0.36629	10.9134
FCGR2C	73	73	7	9	0.294105	0.362118	15.9853
JUP	217	217	4	8	0.340143	0.4518	4272.15
PINK1	1	1	12	11	0.19988	0.21611	0
F13A1	50	50	19	9	0.251273	0.300918	3608.2
ITGB5	62	62	19	10	0.260921	0.323854	2019.01
C1QA	73	73	7	9	0.288874	0.367213	7.79421
FASLG	18	18	14	11	0.148495	0.166612	1.45961
H2BC4	111	111	7	9	0.328727	0.412636	11680.7
BLVRA	212	212	4	8	0.335685	0.447321	3963.14
NAMPT	164	164	9	8	0.318508	0.410972	6341.75
ITLN1	75	75	0	12	0.206704	0.257223	114.18
FCGR3B	124	124	7	9	0.313412	0.393555	67.9821
PALM2AKAP2	163	163	4	9	0.296197	0.388262	44.9984
ALOX5AP	107	107	7	9	0.305855	0.382864	50.5773
VPS9D1	103	103	7	9	0.311725	0.385422	37.7129
CYTOR	172	172	4	9	0.299259	0.394356	52.5512
CEP55	30	30	2	10	0.160637	0.18743	1.66723
JCHAIN	72	72	2	9	0.190503	0.231966	6223.97
CASP8AP2	2	2	13	9	0.191023	0.208291	0
TNFSF10	198	198	4	9	0.302452	0.405592	345.198
VWCE	69	69	0	12	0.206512	0.254971	111.703
KCNJ15	108	108	9	8	0.283344	0.363287	62.3452
HORMAD1	163	163	9	8	0.286883	0.384308	109.613
MYL9	36	36	19	10	0.242844	0.291283	21502.3
TASL	165	165	4	9	0.296659	0.389576	40.6995
GPRC5D	35	35	2	10	0.160734	0.189307	8.70522
GAB2	126	126	9	8	0.284433	0.370044	71.8788
TMEM176B	114	114	9	8	0.316164	0.396082	1522
GCA	232	232	9	8	0.322987	0.445132	2819.62
KLRF1	27	27	14	11	0.148644	0.16999	13.6187
LRRC6	146	146	9	9	0.272114	0.367088	26.7112
CHMP5	148	148	4	9	0.295671	0.384095	18.2772
BCL2A1	95	95	7	9	0.340317	0.41881	5632.22
MGAM	201	201	9	8	0.3205	0.433433	1750.19
KLRC2	3	3	13	9	0.208353	0.228915	621.817
PDE4B	9	9	9	9	0.243733	0.280822	0.416908
TXLNGY	8	8	19	9	0.251226	0.277366	999.137
LINC02649	147	147	9	8	0.285592	0.377677	70.0711
LILRA6	66	66	7	9	0.288374	0.364461	9.22096
BCL11A	13	13	13	9	0.200301	0.222276	27.7374
RTN1	49	49	9	9	0.282503	0.34889	12917.8
TMEM140	171	171	4	8	0.329133	0.42147	15275.1
PKN2	11	11	20	9	0.235086	0.275744	5.88828
IL18R1	15	15	20	8	0.268657	0.30139	205.749
TGFBR3	28	28	14	10	0.173754	0.197413	3270.99
TRIM5	155	155	4	9	0.29404	0.384571	15.7755
STOM	138	138	4	9	0.290133	0.377875	33.1323
FFAR2	172	172	4	8	0.321274	0.417778	1506.2
FGFBP2	29	29	14	10	0.173777	0.197788	3487.86
EIF4E3	130	130	9	8	0.284859	0.371921	77.3379
KRT1	61	61	0	12	0.199521	0.246259	6.65537
MERTK	101	101	7	9	0.308834	0.381167	37.9723
CENPM	31	31	2	10	0.160656	0.187805	1.58757
ABCA5	11	11	13	8	0.224469	0.247497	167.485
COL9A3	3	3	13	8	0.209138	0.228677	0
LPCAT2	216	216	9	8	0.322909	0.441065	2595.01
MXI1	60	60	0	12	0.199491	0.245884	5.72699
IL13RA1	224	224	9	8	0.323458	0.44388	2424
PHGDH	3	3	22	13	0.161926	0.170401	0.125
MARCHF2	38	38	19	10	0.235004	0.279725	79.515
CD300C	163	163	4	9	0.297587	0.389676	32.2753
SERPINA1	286	286	7	8	0.365934	0.49886	9812.33
SLAMF7	96	96	7	8	0.329703	0.405228	8710.11
CLDN23	188	188	4	9	0.301699	0.401713	92.1808
SULT1B1	122	122	9	9	0.274469	0.362307	13.1958
ANXA3	154	154	4	9	0.325911	0.414068	19592.1
LGALSL	33	33	19	9	0.245938	0.288068	900.622
ZBTB32	12	12	2	10	0.160289	0.180673	0.079887
CDK14	129	129	9	9	0.274469	0.364121	14.3909
NFE2	186	186	7	8	0.348782	0.4571	3267.05
PDGFA	42	42	19	10	0.235169	0.281226	73.8477
HAUS4	123	123	9	9	0.274526	0.362682	10.7056
CYP4F3	7	7	6	9	0.239957	0.272562	443
ZNF438	100	100	7	9	0.311433	0.38417	30.7876
XCL1	3	3	13	9	0.208353	0.228915	621.817
SLC25A39	85	85	0	12	0.207025	0.260977	69.9925
INKA2	15	15	6	8	0.251701	0.28741	25.4755
CRYBB2P1	3	3	2	9	0.1812	0.193107	0
TMEM88	103	103	7	9	0.308977	0.381918	38.5369
FCRL3	33	33	13	8	0.244943	0.285337	14128.7
TRIM10	71	71	0	12	0.206576	0.255722	111.005
PDE9A	41	41	13	8	0.228239	0.263283	135.937
HELZ2	194	194	4	9	0.302178	0.40409	307.602
FCRL2	16	16	13	9	0.187923	0.206397	14.7729
UBN2	10	10	20	9	0.235045	0.275369	5.81884
TCN1	14	14	7	10	0.260972	0.29654	0.254167
LINC01765	157	157	9	8	0.286513	0.382056	100.588
DDX60L	1	1	11	2	0.666667	0.75	0
TIPARP	9	9	9	9	0.243733	0.280822	0.416908
ST6GALNAC4	61	61	0	12	0.199521	0.246259	7.38132
LRRN1	161	161	9	8	0.285592	0.382006	107.232
PDK4	219	219	9	8	0.315341	0.437319	1961.69
RBM43	17	17	20	8	0.268062	0.301302	211.501
MX2	196	196	4	9	0.302315	0.404841	342.225
GCNT4	43	43	13	8	0.229616	0.266348	210.567
ANKRD36BP2	3	3	2	11	0.137405	0.145051	0
SLC6A8	66	66	0	12	0.19967	0.248136	42.7666
TYMP	106	106	4	8	0.320887	0.392816	7116.06
BIRC5	25	25	2	10	0.16054	0.185553	0.91251
DUSP6	89	89	7	8	0.298655	0.377196	40.2236
UAP1	25	25	2	9	0.189231	0.214324	198.328
AUTS2	15	15	13	9	0.188162	0.211725	0.614411
PARP10	162	162	4	9	0.299865	0.391828	65.1419
H2AC20	50	50	4	9	0.269527	0.327312	1.4813
RHOB	2	2	9	9	0.234962	0.271202	0
YOD1	3	3	3	2	0.636364	0.714286	0.166667
HAGH	62	62	0	12	0.206288	0.252344	41.5898
CMBL	13	13	19	10	0.254977	0.28172	242.402
PCDH9	6	6	13	9	0.192736	0.211626	1.09026
STMN1	1	1	2	9	0.174941	0.184395	0
ASGR1	83	83	7	8	0.298387	0.375194	14.4488
MEGF9	205	205	9	8	0.321817	0.436498	2055.36
FKBP11	31	31	2	9	0.189393	0.216576	256.431
MANEA	7	7	13	8	0.221631	0.244039	31.2799
TPST1	153	153	9	9	0.275948	0.373318	45.2735
NCOA7	156	156	4	9	0.296132	0.386973	128.59
LILRA5	221	221	7	8	0.352195	0.470488	5072.69
CTSD	90	90	7	9	0.310128	0.379478	35.4269
PPP4R1	134	134	9	8	0.285103	0.373423	75.8041
SMPDL3A	216	216	9	8	0.321895	0.440002	2200.76
FBLN2	47	47	13	8	0.229734	0.267725	227.816
ABCC13	70	70	0	12	0.206544	0.255347	110.892
GIMAP8	5	5	16	9	0.266827	0.309595	1
SLC38A1	50	50	13	9	0.205397	0.246294	72.3368
MOV10	141	141	4	9	0.295475	0.380354	25.9265
C1QB	218	218	4	8	0.335601	0.448447	3587.48
CDCA5	31	31	2	10	0.160656	0.187805	1.93028
KLHL2	105	105	9	9	0.273511	0.355925	8.1108
GUCY1B1	12	12	19	9	0.235502	0.26661	13.1491
FAR2	123	123	9	9	0.274526	0.362682	11.2051
FBXO6	215	215	4	8	0.335939	0.448447	3627.05
ACP3	118	118	7	8	0.300135	0.387394	50.1529
IGSF6	223	223	7	8	0.35874	0.47396	5520.9
PTGS2	104	104	9	8	0.301562	0.385504	864.499
PADI2	39	39	9	9	0.272616	0.334251	11.0988
TSPAN2	155	155	9	8	0.31107	0.405161	7718.84
TUBB1	53	53	19	10	0.235627	0.285356	1005.55
ST3GAL4	86	86	7	9	0.302796	0.370544	20.3224
BCL3	6	6	9	9	0.276463	0.319382	5.74387
VNN3	135	135	9	8	0.285164	0.373798	67.6789
HEPACAM2	12	12	19	10	0.254928	0.281344	242.402
KLHDC7B	228	228	4	8	0.339536	0.454052	3741.6
SLC22A15	227	227	9	8	0.315939	0.440322	2387.6
PRSS33	8	8	13	9	0.201604	0.225971	57.7327
APOL2	125	125	4	9	0.286698	0.365915	10.8639
GPER1	120	120	7	9	0.313117	0.392053	64.0042
E2F2	12	12	19	10	0.248972	0.273386	16.6904
CES1	71	71	7	9	0.288749	0.366463	7.74411
CACHD1	18	18	13	9	0.188242	0.212852	2.67773
WARS1	168	168	4	9	0.300406	0.394331	71.1172
RNF213	114	114	4	9	0.293975	0.37072	40.4899
TPPP3	87	87	7	8	0.299057	0.378261	20602.7
TSPAN5	47	47	0	12	0.199103	0.241004	3.66077
UBXN6	66	66	0	12	0.206384	0.25372	60.9051
DLEU2	6	6	20	9	0.243644	0.283865	6.01657
FHL1	23	23	19	10	0.234383	0.274094	26.2331
CDKN3	56	56	2	9	0.190068	0.22596	3409.92
DGAT2	9	9	6	8	0.245893	0.280194	1.33833
GATA1	65	65	0	12	0.206384	0.25347	103.69
PASK	63	63	13	8	0.23029	0.273481	1855.77
TNS1	57	57	0	12	0.199401	0.244758	4.74406
PHC2	84	84	7	9	0.306348	0.373159	28.7014
CMTM2	175	175	7	9	0.333417	0.445382	1929.97
UBQLNL	185	185	4	9	0.301494	0.400587	73.924
TACSTD2	157	157	9	8	0.285347	0.380505	105.927
PDE3B	11	11	13	9	0.212001	0.237645	58.27
RRM2	30	30	2	10	0.160637	0.18743	3.6739
TREML3P	89	89	7	9	0.307692	0.376162	30.7579
PHTF1	127	127	9	9	0.274526	0.363746	13.9072
SOCS3	102	102	9	8	0.314819	0.389325	2990.47
BATF2	125	125	4	9	0.286637	0.36579	16.0278
FKBP5	1	1	11	2	0.666667	0.75	0
CFD	223	223	4	8	0.340752	0.454177	5506.7
MX1	211	211	4	9	0.303348	0.410472	395.702
OAS2	202	202	4	9	0.302727	0.407093	365.249
CD59	4	4	2	10	0.159235	0.171727	443
SAT1	185	185	4	9	0.301562	0.400712	96.8107
C12orf57	6	6	13	8	0.212034	0.22919	83.2389
IFIH1	47	47	4	10	0.234714	0.287124	0.447853
GZMB	31	31	14	10	0.173822	0.198539	3946.34
NSUN7	6	6	6	9	0.239914	0.272187	0
NDC80	4	4	2	9	0.187342	0.200247	53.6667
ZNF185	36	36	19	10	0.234921	0.278974	75.4779
PPP1R3D	107	107	7	8	0.3	0.384203	33.4811
KDM1B	42	42	9	9	0.273399	0.336753	11.5329
LRG1	104	104	7	9	0.311652	0.385547	39.446
SLC16A10	35	35	13	8	0.22926	0.26322	149.616
ANK1	52	52	0	12	0.199252	0.242881	41.483
SLC8A1	230	230	9	8	0.322831	0.445007	3405.87
ORM1	3	3	7	9	0.239396	0.269359	0
PELI1	9	9	9	9	0.243733	0.280822	0.416908
TIFA	125	125	9	9	0.274469	0.363057	15.9199
CHPT1	4	4	3	2	0.7	0.785714	0.166667
HSPA6	65	65	7	9	0.288312	0.364085	9.18384
ETS2	148	148	9	8	0.319118	0.40947	2273.62
ARL17A	1	1	21	3	0.5	0.611111	0
PRKAR2B	12	12	19	9	0.235502	0.26661	13.7332
ANKRD55	6	6	15	8	0.279421	0.320732	32.4221
BTNL3	148	148	9	8	0.284494	0.376501	91.6104
IFI44	178	178	4	9	0.300542	0.397083	256.235
IRS2	15	15	6	9	0.288874	0.337093	4210.24
KLF1	69	69	0	12	0.206512	0.254971	110.102
PKD2L1	188	188	4	9	0.301767	0.401838	92.745
CLEC12A	242	242	7	8	0.352381	0.476932	6965.39
SNCA	68	68	0	11	0.213942	0.265032	2931.89
TNF	21	21	7	8	0.289817	0.336542	13.2284
H2BC8	95	95	7	9	0.332252	0.415202	10190.1
RUNDC3A	59	59	0	12	0.199461	0.245508	41.1776
CDC42EP3	53	53	7	9	0.288249	0.357952	6.94005
OASL	171	171	4	9	0.298923	0.392579	209.66
HMOX1	201	201	7	9	0.348782	0.462411	3432.49
PARM1	25	25	2	10	0.16054	0.185553	0.91251
FCER1G	91	91	7	9	0.290007	0.37397	18.1281
H2BC7	7	7	19	9	0.235253	0.264608	12.8764
PSTPIP2	133	133	9	8	0.285042	0.373047	72.6085
GINS2	30	30	2	10	0.160637	0.18743	1.47501
DTL	61	61	2	9	0.190204	0.227837	4279.28
RNASEL	7	7	13	9	0.259245	0.300379	100.856
SIRPB1	97	97	7	8	0.298722	0.379511	29.6717
INSL3	107	107	7	9	0.309264	0.38342	43.1778
HMBS	61	61	0	12	0.206256	0.251968	26.7182
ACRBP	39	39	19	10	0.235045	0.2801	80.7314
ARHGAP26	62	62	9	8	0.280185	0.345144	17.3985
KLHL3	34	34	13	8	0.227926	0.26053	123.44
SMCO4	191	191	7	8	0.3552	0.461385	2981.07
AATBC	228	228	4	8	0.339536	0.454052	3967.31
HBD	40	40	0	12	0.198925	0.238501	79.928
DUSP1	155	155	9	8	0.28639	0.381305	93.272
KCNG1	10	10	13	8	0.224431	0.247122	167.385
TBXAS1	87	87	7	8	0.298053	0.375569	7.70629
HOPX	17	17	14	11	0.148478	0.166236	0.845226
FBXL13	142	142	9	9	0.275207	0.369001	29.4369
CCL4L2	2	2	2	9	0.179008	0.189205	0
MKI67	25	25	2	10	0.16054	0.185553	2.446
LILRA2	106	106	7	8	0.299797	0.383577	28.9908
PTTG1	27	27	2	10	0.160579	0.186304	4.95407
GFUS	60	60	0	12	0.199491	0.245884	6.17433
MBNL3	13	13	19	10	0.251891	0.277803	16.6904
CCL3L1	6	6	19	10	0.254441	0.277002	0.111111
GOLM1	92	92	7	9	0.29007	0.374345	16.0137
NRGN	70	70	19	10	0.288874	0.361203	8863.15
LGALS9	128	128	4	9	0.29417	0.374786	32.3
IGLC2	36	36	2	10	0.160753	0.189682	7.87774
POU2AF1	69	69	2	10	0.161474	0.202508	137.581
SYTL2	12	12	13	9	0.188082	0.210599	0.239869
LPAR1	101	101	7	9	0.311652	0.384796	45.0978
LILRB2	261	261	7	8	0.362745	0.488599	7999.99
SLC26A8	169	169	4	9	0.297987	0.391928	40.7672
FPR2	218	218	9	8	0.322753	0.441253	2181.39
SHISA5	182	182	4	9	0.301357	0.399586	93.9068
ARRDC4	13	13	9	9	0.285408	0.330023	191.937
RALGPS2	10	10	13	9	0.197979	0.218244	9.12748
PARP9	194	194	4	9	0.30163	0.403089	291.959
TYMS	64	64	2	10	0.161376	0.200631	103.884
ADAP2	208	208	4	8	0.335347	0.445819	3363.48
HSPH1	19	19	13	7	0.268548	0.305155	19867.3
MYLK	30	30	19	10	0.234672	0.276722	21.503
CEBPB	158	158	9	8	0.28492	0.379541	100.847
GBP1	188	188	4	9	0.301767	0.401838	261.555
NME4	1	1	17	1	1	1	0
AK5	11	11	13	9	0.187844	0.209561	0.166667
PHACTR2	15	15	20	8	0.269909	0.304268	206.321
TGM2	9	9	19	11	0.24026	0.26544	3.10431
PLAAT2	32	32	2	10	0.160676	0.188181	3.12866
GPR18	2	2	10	1	1	1	1
LRRC25	81	81	7	8	0.297654	0.373317	10.7861
AZU1	23	23	7	9	0.285103	0.334893	919.306
TMEM119	122	122	7	9	0.313264	0.392804	69.9654
TMEM204	63	63	13	8	0.248786	0.295883	14283.7
IFI35	180	180	4	9	0.301221	0.398835	250.772
TC2N	12	12	13	9	0.212136	0.238396	58.8695
TLR8	230	230	9	8	0.324166	0.446508	2712.28
GPR155	3	3	7	10	0.25645	0.29665	0.385266
RHCE	84	84	0	12	0.206993	0.260602	119.038
S1PR1	12	12	13	9	0.187897	0.210061	0.763636
CSRNP1	166	166	4	9	0.322909	0.415657	6202.25
ERAP2	5	5	16	9	0.266827	0.309595	1
MS4A3	137	137	9	9	0.304179	0.394425	5672.15
CCL8	180	180	4	9	0.301153	0.39871	69.2723
IL23A	47	47	13	8	0.229774	0.26785	225.964
SLC14A1	67	67	0	12	0.206448	0.25422	38.3789
CA1	67	67	0	12	0.19976	0.248762	181.057
MALAT1	4	4	20	9	0.252368	0.2939	4.48845
TIMP1	21	21	7	9	0.294105	0.342638	182.203
CCNB2	55	55	2	9	0.190041	0.225585	3118.57
SAMD14	3	3	19	11	0.19548	0.217751	0.5
PID1	9	9	13	7	0.262411	0.288076	8853.16
MYBPC3	102	102	7	9	0.311579	0.384921	37.6339
ASPM	54	54	2	9	0.189906	0.224772	3708.43
ANKDD1A	109	109	9	9	0.273511	0.356989	11.7638
DHRS13	111	111	9	8	0.283525	0.364414	28.1109
ZNF267	2	2	11	1	1	1	1
C5AR1	24	24	7	9	0.282383	0.332395	5.05257
GADD45B	122	122	7	9	0.351451	0.437542	34187.6
KIR3DL1	15	15	14	11	0.148346	0.16486	0.121429
PRDM1	4	4	2	10	0.159235	0.171727	443
DEFA3	97	97	7	9	0.317521	0.394118	2177.51
CNTNAP2	6	6	13	9	0.201574	0.225345	57.1988
RMI1	12	12	13	8	0.267685	0.305045	800.993
LINC00926	5	5	13	9	0.206256	0.227053	24.7064
MYL12A	3	3	7	10	0.261638	0.30736	1.39444
TNFRSF17	60	60	2	10	0.161298	0.199129	79.8866
OAS3	188	188	4	9	0.301767	0.401838	322.091
RSAD2	179	179	4	9	0.300949	0.398084	286.532
SIGLEC16	178	178	4	9	0.300949	0.397834	67.7768
IFITM2	203	203	4	9	0.302796	0.407469	106.406
CMTM5	55	55	19	10	0.269472	0.32986	1796.38
CPEB2	123	123	9	9	0.274526	0.362682	12.1801
IFIT2	205	205	4	9	0.302934	0.40822	385.842
ZBTB38	1	1	13	10	0.166771	0.179885	0
CX3CR1	13	13	16	9	0.268386	0.315101	7968.51
P2RY10	14	14	13	9	0.200542	0.22319	12.9293
PML	105	105	4	9	0.288125	0.360234	16.3382
BAMBI	32	32	19	10	0.230769	0.271004	2.3474
ELL2	4	4	2	10	0.159235	0.171727	443
HOXB2	2	2	21	2	0.75	0.833333	2
DPM2	58	58	0	12	0.199431	0.245133	5.98095
TCL1A	24	24	13	8	0.220603	0.246956	3345.65
PDGFC	2	2	7	10	0.247216	0.279045	0
TNFRSF13B	35	35	2	10	0.160734	0.189307	3.57821
STAP1	2	2	2	9	0.179008	0.189205	0
CCR7	67	67	13	9	0.209138	0.25579	1453.3
PIK3IP1	49	49	13	9	0.208418	0.248533	79.8702
CDKN1C	76	76	7	9	0.289062	0.368339	10.2895
ARHGEF12	66	66	0	12	0.206416	0.253845	111.711
MTARC1	114	114	9	9	0.274018	0.359304	8.77335
DDX3Y	8	8	19	9	0.282983	0.328078	75.9155
HNRNPLL	27	27	20	8	0.28596	0.333071	4129.13
IFIT1B	12	12	19	10	0.251606	0.276927	3.10431
SLC11A1	249	249	9	8	0.325832	0.45389	3505.21
SASH1	181	181	4	9	0.301221	0.399085	74.4223
C4BPA	2	2	13	8	0.211798	0.228399	180.58
HNRNPH1	9	9	19	9	0.248554	0.273963	306.95
HINT3	10	10	20	9	0.235045	0.275369	6.31884
CD302	70	70	7	8	0.296924	0.369188	17.8867
ADIPOR1	79	79	0	12	0.2068	0.2586	67.4399
SPNS3	34	34	13	8	0.227731	0.259905	464.25
CEBPA	97	97	7	8	0.299191	0.380199	13.5207
IL15	208	208	4	8	0.3335	0.445281	3452.79
DYNLT1	151	151	4	9	0.291084	0.383005	40.674
TYROBP	122	122	7	9	0.306912	0.388494	59.2186
NABP1	163	163	9	8	0.302796	0.402126	4811.88
GPR183	1	1	18	1	1	1	0
GNG11	64	64	19	10	0.28419	0.351406	4592.03
FCGR2A	149	149	9	8	0.284372	0.376163	99.7494
TMCC2	68	68	0	12	0.20648	0.254596	101.24
EMP1	23	23	7	9	0.294951	0.344765	181.146
ITGB3	51	51	19	10	0.281013	0.346351	2397.57
IFNG	2	2	16	10	0.211664	0.233281	0
ADM	125	125	7	9	0.327917	0.423404	1975.53
FBXL5	158	158	9	8	0.286575	0.382432	92.7961
ZNFX1	167	167	4	9	0.300338	0.393955	52.7104
NFIL3	135	135	9	8	0.285469	0.374424	1149.65
GLCCI1	1	1	13	9	0.185412	0.201241	0
CD300A	168	168	4	9	0.300406	0.394331	52.2746
FCGBP	46	46	13	8	0.219911	0.254161	126.492
TCF7	22	22	13	9	0.194936	0.220233	4.61336
DDIT3	6	6	9	9	0.247446	0.283955	1.31194
IFITM1	196	196	4	9	0.302315	0.404841	104.445
RNF135	76	76	7	8	0.297321	0.37144	16.76
FABP5	29	29	2	10	0.160617	0.187055	3.56435
NLRC4	240	240	7	8	0.360487	0.480529	5358.74
METTL7B	94	94	7	9	0.290196	0.375096	18.3119
RHD	14	14	19	10	0.255026	0.282095	242.479
SMCHD1	102	102	9	8	0.282983	0.361035	60.5546
IL1R2	204	204	9	8	0.321739	0.436185	1751.72
PF4V1	26	26	19	10	0.29249	0.34213	3168.79
PIK3AP1	23	23	20	8	0.260972	0.301685	90.7035
AQP9	231	231	9	8	0.322909	0.444756	2692.93
RIN2	219	219	4	8	0.336279	0.449948	3656.24
UBE2S	3	3	2	8	0.224205	0.234754	1187.41
ZNF683	8	8	13	8	0.21655	0.234676	1275.92
MMP9	14	14	7	10	0.273343	0.320401	584.386
SRGAP2C	67	67	7	9	0.286452	0.363422	7.41962
RIPK2	10	10	19	10	0.293198	0.335066	42.2692
CST7	2	2	8	1	1	1	0
SLC40A1	11	11	19	9	0.23546	0.266235	13.825
UGCG	7	7	20	9	0.234921	0.274243	5.35293
SLCO4C1	8	8	15	9	0.267631	0.314074	5.73148
TRGV9	1	1	13	10	0.158214	0.169254	0
NT5DC2	9	9	2	10	0.160212	0.179422	0.053571
PLIN4	120	120	9	9	0.270732	0.357454	24.9434
CACNA2D3	14	14	13	7	0.277269	0.311867	44274.5
NMT2	12	12	13	8	0.225343	0.253939	270.543
HERC5	192	192	4	9	0.301494	0.402339	263.768
WDFY3	209	209	9	8	0.322128	0.438062	2448.97
CD79A	30	30	13	8	0.221042	0.249621	5321.88
DCAF12	74	74	0	12	0.206672	0.256848	1389.87
CDC34	62	62	0	12	0.199551	0.246635	6.5017
CBLB	15	15	13	9	0.188162	0.211725	1.90824
LBH	13	13	13	9	0.200723	0.225987	3.58297
SPTA1	13	13	19	10	0.251891	0.277803	3.75062
MS4A6A	72	72	7	9	0.288749	0.366713	12.0934
S100A12	265	265	7	8	0.356436	0.48713	8180.41
LHFPL2	99	99	7	9	0.311506	0.384045	37.4187
PAX5	5	5	13	9	0.206256	0.227053	24.7064
HBQ1	64	64	0	11	0.240346	0.291899	14131.1
RIOK3	6	6	3	2	0.875	0.928571	2.66667
CD69	3	3	9	10	0.233357	0.266578	0.083333
SLC31A2	228	228	7	8	0.357776	0.474898	5503.66
ACSL4	7	7	20	9	0.243688	0.28424	6.18324
PTPRC	4	4	13	10	0.222408	0.251268	288.036
DBNDD1	41	41	13	8	0.228239	0.263283	182.529
HK3	234	234	7	8	0.359903	0.478214	6189.92
CXCL8	15	15	6	8	0.29812	0.344112	3756.2
STX3	148	148	9	8	0.285776	0.378302	87.8452
LITAF	162	162	9	8	0.286822	0.383933	101.267
IFI6	174	174	4	9	0.300813	0.396583	94.0324
ATP6V0E2	52	52	13	8	0.229972	0.269727	156.074
ABCB9	38	38	2	10	0.160792	0.190433	4.64836
SLC22A16	116	116	7	9	0.312823	0.390552	60.8469
TRAT1	13	13	13	8	0.225801	0.255691	106.509
GLUL	24	24	7	9	0.29417	0.343514	2819.69
IL1B	132	132	7	8	0.344631	0.434695	2826.99
ZCCHC2	105	105	4	9	0.293134	0.369981	1218.93
ENPP2	183	183	4	9	0.301357	0.399836	85.5691
RBPMS2	22	22	19	11	0.22519	0.262105	3.39768
LGALS3	65	65	0	12	0.206384	0.25347	42.4125
CD58	81	81	7	8	0.297654	0.373317	10.7861
SLC2A14	128	128	9	9	0.30411	0.391723	4571.56
GAA	4	4	9	9	0.272951	0.315869	498.215
BMX	156	156	9	8	0.284981	0.379504	95.4026
MTURN	35	35	19	10	0.234879	0.278599	74.5451
SH3BGRL2	39	39	19	9	0.246211	0.29032	1050.07
IAH1	1	1	5	2	0.555556	0.6	0
TRIM14	128	128	4	9	0.286822	0.366916	16.2648
VASH1	2	2	7	9	0.238368	0.266194	0.828745
MZT2A	5	5	22	12	0.193016	0.20598	0.325
BANK1	22	22	13	9	0.206768	0.233691	731.257
P2RY13	64	64	7	8	0.296659	0.367186	6.50936
SLC6A12	105	105	7	9	0.30912	0.382669	38.6601
CLEC4D	243	243	7	8	0.35932	0.479903	5504.93
UBE2L6	168	168	4	9	0.299865	0.39333	82.1171
ARHGEF40	78	78	9	8	0.277847	0.348174	18.6843
ALAS2	87	87	0	11	0.241348	0.300532	24684.6
MGAM2	138	138	9	9	0.275207	0.367937	20.9601
CDK1	56	56	2	9	0.190068	0.22596	3400.1
ZFY	9	9	19	10	0.25576	0.279843	3.65726
ATF3	162	162	4	9	0.296132	0.387887	47.3365
TIMP2	108	108	7	8	0.299932	0.384328	45.1977
LONRF1	11	11	9	8	0.260921	0.303731	1.37208
CBR1	58	58	4	10	0.235169	0.291253	1.30409
TOP1	4	4	20	9	0.252368	0.2939	4.48845
H3C10	160	160	4	9	0.309623	0.406768	7536.97
PLD4	4	4	13	9	0.181126	0.194978	0.2
FCRL6	11	11	14	11	0.14828	0.163358	1.08333
RAB3IL1	70	70	0	12	0.206544	0.255347	110.892
SPON2	6	6	14	11	0.148198	0.161482	0.090909
RBM47	219	219	9	8	0.323144	0.442129	2573.4
NOD2	221	221	7	8	0.358836	0.473647	4544.56
PPP1R3B	5	5	9	9	0.244538	0.282198	0
DISC1	17	17	20	8	0.271892	0.306457	239.205
DLGAP5	30	30	2	10	0.160637	0.18743	3.39686
TRIM58	63	63	0	11	0.211227	0.260311	2498.47
PROK2	127	127	9	8	0.284494	0.37042	80.0444
ESAM	60	60	19	10	0.256499	0.318135	1358.35
CMPK2	145	145	4	9	0.287938	0.373422	78.0324
PRUNE2	120	120	7	9	0.313117	0.392053	69.035
DACH1	3	3	12	9	0.234879	0.272992	206.332
TENM1	3	3	13	9	0.218039	0.23952	97.8932
MCEMP1	219	219	7	8	0.348417	0.467854	4573.55
ARMT1	7	7	13	8	0.243421	0.265743	93.9269
PHLDA2	15	15	19	10	0.287255	0.335477	261.459
SUCNR1	45	45	19	10	0.235294	0.282353	88.8794
RAB27B	47	47	19	9	0.251131	0.299792	3343.19
FCHO2	120	120	7	8	0.300881	0.389083	50.7801
COL18A1	10	10	6	8	0.245938	0.280569	2.08396
ADAMTSL4	8	8	19	9	0.280008	0.322009	0.25
CYP1B1	214	214	9	8	0.322206	0.439939	2198.54
CR1	107	107	9	8	0.283465	0.363287	40.2243
HSH2D	156	156	4	9	0.297987	0.387073	59.4022
IGF2BP3	8	8	7	10	0.260665	0.294287	0.1875
IRF5	139	139	4	9	0.287503	0.371045	14.9785
SAMSN1	142	142	9	8	0.310924	0.402583	1526.72
TBC1D9	5	5	13	8	0.221079	0.242274	28.1159
GBP5	39	39	4	10	0.234383	0.284121	0.311936
PRF1	29	29	14	10	0.173732	0.197538	3374.84
RAB31	120	120	7	8	0.300881	0.389083	58.5139
SERPINF1	7	7	22	12	0.193071	0.206731	332.158
CRISPLD2	91	91	7	8	0.298454	0.377321	11.5805
BRI3	112	112	7	9	0.305715	0.383927	48.1144
GP6	29	29	19	10	0.230649	0.269878	1.59213
SLC27A3	159	159	4	9	0.297388	0.3883	21.7754
CDC45	31	31	2	10	0.160656	0.187805	1.52716
GALM	155	155	4	9	0.296329	0.385484	18.0707
GGTA1	39	39	9	9	0.267041	0.330767	4.84222
RETN	112	112	7	9	0.321351	0.402689	680.808
DMXL2	194	194	9	8	0.317294	0.429929	1767.91
HECW2	152	152	9	9	0.276177	0.373568	47.401
MEFV	90	90	9	8	0.282263	0.356531	48.0785
RCAN3	11	11	13	9	0.200361	0.224323	3.47881
RFX2	121	121	9	9	0.270787	0.357829	25.2683
H2AC18	8	8	4	9	0.25759	0.300733	0.672163
NLRP2	16	16	13	7	0.244449	0.275123	28385.1
MPL	59	59	19	10	0.278953	0.34525	3113.74
KLHDC8B	158	158	4	9	0.2943	0.385822	23.7576
STAT1	165	165	4	9	0.299663	0.392204	81.538
S100P	91	91	7	9	0.311215	0.388244	744.485
UHRF1	31	31	2	10	0.160656	0.187805	1.63508
GPR42	199	199	4	9	0.302521	0.405967	105.862
MCTP1	221	221	9	8	0.322753	0.442567	2229.41
FOXO3	6	6	3	2	0.875	0.928571	2.66667
KIR3DL2	18	18	14	11	0.148396	0.165986	3.26154
KIR2DL1	14	14	14	11	0.14833	0.164485	0.05
KCND1	92	92	7	9	0.303279	0.372922	37.1748
DRAM1	240	240	7	8	0.361269	0.481467	6037.98
KLF4	118	118	7	9	0.343919	0.429821	8785.64
NCAPH	27	27	2	10	0.160579	0.186304	2.46552
MYOM2	13	13	13	8	0.22519	0.253689	270.835
DNPH1	5	5	22	13	0.161965	0.171151	0.791667
TCF7L2	156	156	7	9	0.343387	0.443768	1252.44
MS4A1	12	12	13	9	0.191682	0.212953	16.4234
UICLM	84	84	7	9	0.287503	0.369803	11.0031
GRN	239	239	4	8	0.34224	0.460309	7264.15
P2RX7	75	75	7	9	0.289	0.367964	8.35698
HSPA1A	123	123	7	8	0.33945	0.424735	16128
RUNX2	4	4	15	8	0.275891	0.312787	32.4221
IRAK3	203	203	9	8	0.32205	0.436373	2061.05
RGL1	182	182	4	9	0.300203	0.39861	277.422
GNG8	35	35	19	10	0.234879	0.278599	42.5604
GNGT2	2	2	16	10	0.211664	0.233281	0
TSPAN13	13	13	13	9	0.200512	0.222814	15.225
MXD1	179	179	9	8	0.311215	0.416153	2108.68
PNMA3	39	39	13	8	0.228082	0.262282	187.245
HDC	3	3	13	9	0.233848	0.263233	36.0637
GBP4	166	166	4	9	0.300203	0.393455	45.1911
ACOT9	153	153	4	9	0.296197	0.384734	17.3844
TBC1D4	44	44	13	8	0.219838	0.253411	125.601
FCMR	22	22	13	9	0.200784	0.226193	51.8934
NFIX	62	62	0	12	0.199551	0.246635	33.5544
SLAMF6	7	7	13	8	0.213462	0.232816	4.14733
ADAM28	18	18	13	9	0.200542	0.224316	54.5987
VNN2	246	246	9	8	0.324088	0.450387	3123.61
NAIP	18	18	20	8	0.271173	0.30692	210.047
SORT1	101	101	7	9	0.311579	0.384671	30.0724
H2BC9	113	113	7	9	0.328241	0.413512	26073.9
GTF2IP4	1	1	13	9	0.206544	0.222012	0
RGS2	179	179	9	8	0.320423	0.419355	4221.3
PRTN3	119	119	7	9	0.313043	0.391678	63.5169
TMOD1	61	61	0	12	0.206256	0.251968	26.7182
ZDHHC19	99	99	7	9	0.308691	0.380417	36.3733
LTF	86	86	7	9	0.316916	0.381098	14110
NOG	50	50	13	8	0.22863	0.266786	1992.2
SEC14L5	30	30	19	10	0.240563	0.278797	82.4654
MCTP2	15	15	20	9	0.275891	0.322298	1731.95
SDCBP	159	159	9	8	0.286637	0.382807	93.6442
CPD	133	133	9	8	0.285042	0.373047	71.7888
NPIPB3	3	3	5	2	0.714286	0.8	0.5
CGAS	28	28	20	8	0.292619	0.34219	3851.25
ACKR1	1	1	17	1	1	1	0
CD14	284	284	7	8	0.35874	0.494888	9561.31
FOXM1	24	24	2	10	0.160521	0.185178	2.16155
PLXNB2	27	27	4	8	0.278953	0.333529	0.635424
SOS1	5	5	13	8	0.221557	0.243288	29.1184
PGM5	109	109	7	9	0.312309	0.387924	52.0191
OSBPL10	17	17	13	9	0.200633	0.224316	38.2507
CXCL5	40	40	19	9	0.246256	0.290695	1128.64
DAPK2	107	107	9	9	0.270018	0.352574	20.9468
SAMD3	11	11	13	9	0.200663	0.225236	2.46945
ITM2C	40	40	2	10	0.160831	0.191184	10.9771
ETS1	53	53	13	9	0.208581	0.25016	86.3796
MT1G	5	5	4	8	0.269091	0.30818	1.80227
RALB	110	110	7	9	0.312236	0.388049	48.9812
KCNJ2	132	132	9	8	0.284981	0.372672	66.8457
PTGS1	37	37	19	10	0.234962	0.27935	79.515
RAP1GAP	73	73	0	12	0.20664	0.256473	109.549
CCNJL	112	112	9	8	0.279891	0.361062	25.266
MFAP3L	12	12	19	9	0.235502	0.26661	13.0506
KLF5	12	12	9	9	0.243867	0.281948	15.4448
AATK	67	67	9	9	0.267793	0.337434	10.4475
IGLJ3	12	12	2	10	0.160289	0.180673	0.328679
CA2	60	60	19	10	0.28413	0.350593	3683.36
GPR27	47	47	9	9	0.267631	0.334145	5.08425
LINC01094	153	153	9	8	0.28596	0.379929	86.5592
SAMD9	175	175	4	9	0.292619	0.392014	239.359
SERPINB1	111	111	7	9	0.311944	0.387862	49.8229
RBCK1	145	145	4	9	0.298722	0.385447	45.039
C15orf48	25	25	7	9	0.295082	0.345516	187.558
TUBB6	1	1	18	1	1	1	0
CCR5	4	4	2	8	0.227226	0.241611	1187.41
MME	7	7	6	9	0.239957	0.272562	443
DDX11	1	1	21	3	0.5	0.611111	0
PARP12	164	164	4	9	0.300135	0.392829	55.8647
G0S2	6	6	19	10	0.278836	0.308427	28.5297
HERC2P3	18	18	20	9	0.243377	0.286742	116.197
SNX10	98	98	9	9	0.273119	0.353298	9.67454
TLR2	159	159	9	8	0.314373	0.41629	1207.74
FOLR3	183	183	7	9	0.334842	0.449323	2275.62
SRXN1	20	20	7	8	0.289754	0.336167	13.1977
AXIN2	52	52	13	8	0.248368	0.292005	10909.3
NKG7	4	4	14	12	0.129433	0.140207	0.72381
BNIP3L	13	13	19	10	0.251701	0.277303	18.8825
LINC00402	7	7	13	9	0.201604	0.225721	57.1988
DUSP5	154	154	4	9	0.325434	0.413355	10075.4
RNASE4	132	132	7	8	0.301699	0.393587	67.1359
MMRN1	8	8	19	10	0.201208	0.225652	0
PLA2G4C	97	97	7	9	0.308476	0.379541	32.6744
TSC22D1	41	41	19	10	0.235128	0.280851	87.9557
CXCR6	2	2	21	2	0.75	0.833333	2
KLHL14	48	48	2	9	0.189852	0.222957	2430.5
CCNB1	22	22	2	10	0.160482	0.184427	1.88262
NRCAM	16	16	13	8	0.233357	0.261261	752.782
GGH	20	20	2	9	0.189097	0.212447	251.091
MYL4	58	58	0	12	0.20616	0.250842	25.2624
CRIP2	5	5	22	12	0.193016	0.20598	0.325
MPP1	65	65	0	12	0.206384	0.25347	51.8913
TRAC	4	4	13	9	0.187131	0.204618	0.139379
CASP4	118	118	7	9	0.30663	0.386993	53.8782
OSBP2	62	62	0	12	0.206288	0.252344	19.5217
RAB20	123	123	7	8	0.343299	0.430504	2119.79
UTY	8	8	19	10	0.255564	0.279092	7.75861
SERPINB9	5	5	16	9	0.263033	0.303514	1
FPR1	276	276	7	8	0.357968	0.491885	9047.89
EIF2AK2	180	180	4	9	0.300677	0.397834	264.265
RBM38	68	68	0	12	0.206448	0.254471	61.7688
SGK1	36	36	6	7	0.309984	0.360857	11132.2
LIN7A	129	129	9	9	0.274696	0.364559	17.5635
GZMM	8	8	22	11	0.238881	0.261456	11908
ABLIM1	51	51	13	9	0.208483	0.249284	81.1417
MTFR2	4	4	2	8	0.20339	0.219785	222.696
TENT5A	106	106	4	9	0.285042	0.36326	14.2942
NBPF26	2	2	20	9	0.22379	0.244296	0
TRBC1	55	55	13	8	0.230092	0.270853	192.372
NSG1	40	40	13	8	0.228121	0.262657	187.258
PF4	30	30	19	10	0.277905	0.334464	136.56
ZNF684	160	160	4	9	0.298655	0.390227	50.4912
BASP1	259	259	9	8	0.325513	0.455892	3918.96
KIAA0319	7	7	6	9	0.239957	0.272562	443
LMO2	209	209	4	8	0.333167	0.445676	4716.81
SMIM1	52	52	0	12	0.199252	0.242881	5.06096
LILRB4	203	203	4	8	0.329621	0.438124	3041.54
TOR1B	157	157	4	9	0.296461	0.386235	19.8058
FCGR2B	154	154	4	9	0.29699	0.386298	25.5967
KLRC1	13	13	14	11	0.148313	0.164109	0.05
FECH	62	62	0	12	0.206288	0.252344	19.5217
GADD45A	92	92	9	9	0.27256	0.350607	675.316
CCR6	4	4	13	8	0.221042	0.241899	27.9159
BACH1	39	39	9	9	0.273231	0.335627	11.9585
KYNU	46	46	7	9	0.287193	0.357078	3.90756
RCBTB2	34	34	9	9	0.272951	0.33375	11.2342
RPL13	4	4	13	9	0.183522	0.196865	0.44697

## Sheet: HIV
Id	numberofpairsincombinededgelist	Degree	modularity_class	Eccentricity	closnesscentrality	harmonicclosnesscentrality	betweenesscentrality
IDH2	256	256	29	2	0.944444	0.970588	18.7189
MZB1	234	234	29	2	0.877419	0.930147	17.8666
UBXN6	213	213	26	2	0.961039	0.97973	9.9613
ANPEP	141	141	0	2	0.932515	0.963816	7.2989
GZMK	265	265	29	2	0.97491	0.987132	20.9835
NEK2	243	243	29	2	0.903654	0.946691	16.1493
SLC14A1	204	204	26	2	0.925	0.959459	8.03183
TPGS2	208	208	26	2	0.940678	0.968468	7.90244
UBE2H	206	206	26	2	0.932773	0.963964	8.19843
PNOC	1	1	20	2	0.666667	0.75	0
IFIT3	90	90	8	2	0.924528	0.959184	4.14923
IFIT1	92	92	8	2	0.942308	0.969388	4.50969
CEBPE	21	21	25	2	0.92	0.956522	1.25493
SPTA1	211	211	26	2	0.95279	0.975225	9.23427
H3C10	8	8	4	1	1	1	1.12619
YARS1	264	264	29	2	0.971429	0.985294	20.6714
RHD	220	220	26	2	0.991071	0.995495	10.2401
DGAT2	127	127	0	2	0.858757	0.917763	6.00096
METTL22	209	209	26	2	0.944681	0.970721	8.51405
R3HDM4	220	220	26	2	0.991071	0.995495	10.3644
RHCE	218	218	26	2	0.982301	0.990991	10.1905
ABCA7	131	131	0	2	0.878613	0.930921	6.27885
PCNA	255	255	29	2	0.941176	0.96875	20.2335
RNF14	203	203	26	2	0.921162	0.957207	7.60962
CHPT1	206	206	26	2	0.932773	0.963964	8.19843
CLIC3	249	249	29	2	0.922034	0.957721	18.2079
S100P	126	126	0	2	0.853933	0.914474	7.08603
ADGRG3	122	122	0	2	0.835165	0.901316	4.98741
VCAN	3	3	23	1	1	1	0
SELPLG	13	13	17	1	1	1	0.481818
POLQ	213	213	29	2	0.821752	0.891544	10.3917
ZBTB44	212	212	26	2	0.956897	0.977477	9.12772
HCAR2	123	123	0	2	0.839779	0.904605	4.73187
TRIM58	172	172	26	2	0.816176	0.887387	6.84413
MCM6	265	265	29	2	0.97491	0.987132	20.7006
SEC14L1	211	211	26	2	0.95279	0.975225	9.10957
CMKLR1	14	14	6	1	1	1	0.24359
KIF20A	241	241	29	2	0.89769	0.943015	16.0343
DHX58	89	89	8	2	0.915888	0.954082	4.25062
SLC26A8	2	2	1	1	1	1	0
TNFRSF13B	233	233	29	2	0.874598	0.928309	13.6731
PRC1	245	245	29	2	0.909699	0.950368	13.5679
RTP4	89	89	8	2	0.915888	0.954082	4.47108
RIPOR3	199	199	26	2	0.906122	0.948198	7.45014
TYMS	247	247	29	2	0.915825	0.954044	16.8014
CENPM	242	242	29	2	0.900662	0.944853	13.1985
BATF2	92	92	8	2	0.942308	0.969388	4.62116
TREML1	30	30	18	2	0.734375	0.819149	1.01605
BCL6	150	150	0	2	0.987013	0.993421	8.59265
CDC25A	267	267	29	2	0.981949	0.990809	20.2711
CCDC15	18	18	3	2	0.909091	0.95	0.917239
CDC45	245	245	29	2	0.909699	0.950368	13.1565
PACSIN1	237	237	29	2	0.885993	0.935662	12.8673
IL18RAP	149	149	0	2	0.980645	0.990132	8.38094
DNAJA4	200	200	26	2	0.909836	0.95045	7.85464
ABCC3	43	43	18	2	0.921569	0.957447	4.41689
IFRD1	139	139	0	2	0.921212	0.957237	7.14481
RGL1	91	91	8	2	0.933333	0.964286	4.45817
KIF11	240	240	29	2	0.894737	0.941176	12.8528
RPIA	202	202	26	2	0.917355	0.954955	8.12168
UCK2	201	201	29	2	0.793003	0.869485	12.2095
ORM1	131	131	0	2	0.878613	0.930921	6.22717
CEACAM6	226	226	29	2	0.855346	0.915441	13.3771
NCAPG	235	235	29	2	0.880259	0.931985	12.7644
TCEA3	18	18	12	2	0.764706	0.846154	0.986009
TIMELESS	232	232	29	2	0.871795	0.926471	12.3666
GLRX5	222	222	26	1	1	1	10.3781
PBX1	208	208	26	2	0.940678	0.968468	9.45715
AKAP7	156	156	26	2	0.770833	0.851351	6.01581
NINJ2	213	213	26	2	0.961039	0.97973	9.41562
IGSF6	13	13	17	1	1	1	0.481818
SIRPB1	120	120	0	2	0.826087	0.894737	5.01141
KRT72	1	1	2	1	1	1	0
CENPK	236	236	29	2	0.883117	0.933824	14.0274
PPM1F	145	145	0	2	0.955975	0.976974	8.10234
PSMF1	216	216	26	2	0.973684	0.986486	10.1062
WLS	140	140	0	2	0.926829	0.960526	7.25992
TESC	210	210	26	2	0.948718	0.972973	9.91472
BMP2K	202	202	26	2	0.917355	0.954955	7.5251
C1QB	12	12	6	2	0.875	0.928571	0.076923
CLDN5	36	36	18	2	0.810345	0.882979	1.56099
MYDGF	251	251	29	2	0.928328	0.961397	18.5099
CYSTM1	17	17	3	2	0.869565	0.925	0.854739
FCER1A	18	18	3	2	0.909091	0.95	1.20454
CDKN1A	8	8	4	1	1	1	1.12619
PDCD1	259	259	29	2	0.954386	0.976103	19.5979
NT5M	43	43	18	2	0.921569	0.957447	4.14009
MAP2K3	207	207	26	2	0.936709	0.966216	9.74291
CACNG6	20	20	25	2	0.884615	0.934783	1.39905
IFI44L	87	87	8	2	0.899083	0.943878	3.65217
HAGH	214	214	26	2	0.965217	0.981982	10.022
PDK4	17	17	3	2	0.869565	0.925	1.23506
GGH	230	230	29	2	0.866242	0.922794	11.9917
TSHZ3	131	131	0	2	0.878613	0.930921	5.6931
DCLRE1A	191	191	29	2	0.770538	0.851103	8.752
IRX3	44	44	18	2	0.94	0.968085	4.21152
THBS1	32	32	18	2	0.758065	0.840426	1.62104
IFI27	259	259	29	2	0.954386	0.976103	21.0018
PROK2	149	149	0	2	0.980645	0.990132	8.57918
HES4	85	85	8	2	0.882883	0.933673	3.6657
PASK	14	14	13	2	0.769231	0.85	0.91243
TBCEL	220	220	26	2	0.991071	0.995495	10.2401
BASP1	150	150	0	2	0.987013	0.993421	8.59958
IGLL1	271	271	29	2	0.996337	0.998162	21.1551
PDZK1IP1	200	200	26	2	0.909836	0.95045	8.03613
MPL	33	33	18	2	0.770492	0.851064	0.968787
TRIM10	202	202	26	2	0.917355	0.954955	7.50968
PCSK1N	194	194	26	2	0.888	0.936937	8.15405
TTK	238	238	29	2	0.888889	0.9375	14.9081
MCM2	237	237	29	2	0.885993	0.935662	13.3268
CEACAM1	95	95	8	2	0.970297	0.984694	4.77947
NME4	203	203	26	2	0.921162	0.957207	7.87872
PDLIM7	20	20	3	1	1	1	1.53285
PHGDH	238	238	29	2	0.888889	0.9375	15.0292
FAM30A	1	1	20	2	0.666667	0.75	0
FCRL5	7	7	11	2	0.733333	0.818182	0.222222
CXCR2P1	7	7	5	2	0.888889	0.9375	0.166667
CD8A	269	269	29	2	0.989091	0.994485	21.0629
MME	141	141	0	2	0.932515	0.963816	7.77446
ARL4A	212	212	26	2	0.956897	0.977477	8.77466
ZNF91	203	203	26	2	0.921162	0.957207	8.20345
KLRB1	2	2	24	1	1	1	0
BPI	234	234	29	2	0.877419	0.930147	13.9174
TPX2	220	220	29	2	0.839506	0.904412	11.0064
KLF1	196	196	26	2	0.895161	0.941441	7.18142
TRGV2	223	223	29	2	0.847352	0.909926	11.3623
CXCL10	91	91	8	2	0.933333	0.964286	4.31668
IFI27L2	247	247	29	2	0.915825	0.954044	18.4059
MMP8	272	272	29	1	1	1	21.1588
TACO1	225	225	29	2	0.852665	0.913603	13.1984
MTURN	47	47	18	1	1	1	4.89259
GLUL	192	192	26	2	0.880952	0.932432	6.8038
VAMP5	13	13	6	2	0.933333	0.964286	0.166667
SLC26A11	15	15	12	2	0.702703	0.788462	0.438967
ID3	23	23	12	2	0.896552	0.942308	4.6556
NRGN	46	46	18	2	0.979167	0.989362	4.84814
CKAP4	146	146	0	2	0.962025	0.980263	7.98694
TRBV2	244	244	29	2	0.906667	0.948529	15.8427
KLHL14	237	237	29	2	0.885993	0.935662	14.1805
GNG7	22	22	12	2	0.866667	0.923077	2.22545
DDX60	96	96	8	2	0.98	0.989796	4.99785
CDKN2D	199	199	26	2	0.906122	0.948198	8.50723
SESN3	212	212	26	2	0.956897	0.977477	9.44432
SLC11A1	147	147	0	2	0.968153	0.983553	8.33085
THEMIS	244	244	29	2	0.906667	0.948529	18.7707
IGHV1	250	250	29	2	0.92517	0.959559	17.3364
NECAB2	150	150	0	2	0.987013	0.993421	8.53008
RANBP1	262	262	29	2	0.964539	0.981618	20.0906
UBE2C	239	239	29	2	0.891803	0.939338	14.2904
CHST13	136	136	0	2	0.904762	0.947368	6.22438
ACOT7	254	254	29	2	0.937931	0.966912	18.5094
LPCAT2	16	16	3	2	0.833333	0.9	1.2273
CABP5	38	38	18	2	0.839286	0.904255	1.29745
H2AC18	8	8	5	1	1	1	1.83333
ZSCAN18	2	2	21	1	1	1	0
SIAH2	183	183	26	2	0.850575	0.912162	7.08524
MZT2A	214	214	26	2	0.965217	0.981982	9.40456
CMBL	216	216	26	2	0.973684	0.986486	9.7643
ANXA3	111	111	0	2	0.787565	0.865132	4.16988
GNAQ	140	140	0	2	0.926829	0.960526	6.37975
LRRC25	17	17	3	2	0.869565	0.925	0.854739
GCAT	214	214	26	2	0.965217	0.981982	9.96646
TCN2	89	89	8	2	0.915888	0.954082	4.4842
TOP2A	228	228	29	2	0.860759	0.919118	11.3994
KIFC1	233	233	29	2	0.874598	0.928309	12.7114
FAM98A	244	244	29	2	0.906667	0.948529	16.3461
RRP7A	246	246	29	2	0.912752	0.952206	16.5221
TIAM2	132	132	0	2	0.883721	0.934211	6.50383
C12orf75	264	264	29	2	0.971429	0.985294	20.7659
DEFA1B	268	268	29	2	0.985507	0.992647	21.0552
CDCA5	220	220	29	2	0.839506	0.904412	10.3639
OSBPL10	18	18	13	2	0.909091	0.95	3.96325
UAP1	240	240	29	2	0.894737	0.941176	13.8356
CREG1	209	209	26	2	0.944681	0.970721	9.11613
STEAP4	136	136	0	2	0.904762	0.947368	5.96842
MAL	26	26	12	1	1	1	5.35444
YPEL3	212	212	26	2	0.956897	0.977477	9.90891
RPS6KA5	144	144	0	2	0.95	0.973684	7.8098
RSAD2	90	90	8	2	0.924528	0.959184	4.03435
GAR1	221	221	29	2	0.842105	0.90625	15.1238
KIR3DL1	3	3	28	2	0.8	0.875	0.333333
CXCR2	149	149	0	2	0.980645	0.990132	8.57251
PLK4	244	244	29	2	0.906667	0.948529	13.5078
H2AW	200	200	26	2	0.909836	0.95045	7.38331
IFNG	205	205	29	2	0.80236	0.876838	11.8439
DMTN	213	213	26	2	0.961039	0.97973	9.39454
SVBP	213	213	26	2	0.961039	0.97973	9.39454
H4C5	93	93	8	2	0.951456	0.97449	4.5845
STIL	222	222	29	2	0.84472	0.908088	12.4238
PSAT1	222	222	29	2	0.84472	0.908088	12.3459
RAB44	21	21	25	2	0.92	0.956522	1.1985
CDH23	140	140	0	2	0.926829	0.960526	6.6989
ST6GALNAC4	204	204	26	2	0.925	0.959459	7.63534
GRINA	199	199	26	2	0.906122	0.948198	7.99547
SNORD13	204	204	26	2	0.925	0.959459	7.83649
CISD2	197	197	26	2	0.898785	0.943694	7.17842
PNKD	34	34	18	2	0.783333	0.861702	1.083
SELENBP1	213	213	26	2	0.961039	0.97973	9.00259
ACTA2	14	14	6	1	1	1	0.24359
PRF1	267	267	29	2	0.981949	0.990809	21.0512
ANO9	3	3	30	1	1	1	0.5
SLC22A4	136	136	0	2	0.904762	0.947368	7.0598
CDKN3	238	238	29	2	0.888889	0.9375	12.5518
TRIM69	14	14	6	1	1	1	0.24359
RAD23A	202	202	26	2	0.917355	0.954955	8.11118
H2BC17	1	1	7	1	1	1	0
RMI2	235	235	29	2	0.880259	0.931985	13.0739
CCZ1B	167	167	29	2	0.721485	0.806985	7.05622
BST2	88	88	8	2	0.907407	0.94898	3.69161
RBPMS2	6	6	4	2	0.8	0.875	0.309524
TXNDC12	211	211	26	2	0.95279	0.975225	9.14927
ISG15	74	74	8	2	0.803279	0.877551	3.24909
DENND3	135	135	0	2	0.899408	0.944079	7.13472
IFIT5	91	91	8	2	0.933333	0.964286	4.22428
FKBP8	196	196	26	2	0.895161	0.941441	7.87804
MMP25	151	151	0	2	0.993464	0.996711	8.60616
F2RL1	115	115	0	2	0.804233	0.878289	4.915
REPS2	131	131	0	2	0.878613	0.930921	6.64188
CST7	269	269	29	2	0.989091	0.994485	21.0215
TSPAN7	216	216	26	2	0.973684	0.986486	10.0432
IL2RB	268	268	29	2	0.985507	0.992647	21.0177
CYBRD1	126	126	0	2	0.853933	0.914474	5.74593
RNASE2	23	23	25	1	1	1	1.77946
OSBPL1A	12	12	17	2	0.928571	0.961538	0.181818
RNF11	207	207	26	2	0.936709	0.966216	8.20341
RAD51C	221	221	29	2	0.842105	0.90625	12.9937
AMFR	200	200	26	2	0.909836	0.95045	8.20203
H4C8	92	92	8	2	0.942308	0.969388	4.52909
PRSS33	20	20	25	2	0.884615	0.934783	1.39905
HSPE1	173	173	29	2	0.733154	0.818015	11.1033
IL1B	147	147	0	2	0.968153	0.983553	7.93669
ODC1	214	214	26	2	0.965217	0.981982	10.0073
RACGAP1	216	216	29	2	0.829268	0.897059	11.0118
MTRNR2L1	208	208	26	2	0.940678	0.968468	8.50837
KIR3DL2	4	4	9	1	1	1	0
STAP1	1	1	7	1	1	1	0
F13A1	47	47	18	1	1	1	4.89259
ACSL1	147	147	0	2	0.968153	0.983553	8.33085
VNN1	142	142	0	2	0.938272	0.967105	6.73985
EIF2AK2	87	87	8	2	0.899083	0.943878	3.38464
DTYMK	236	236	29	2	0.883117	0.933824	13.2443
LYL1	219	219	26	2	0.986667	0.993243	10.3367
MRPL15	188	188	29	2	0.764045	0.845588	11.944
RGCC	217	217	26	2	0.977974	0.988739	10.06
CDK1	244	244	29	2	0.906667	0.948529	13.5078
OASL	88	88	8	2	0.907407	0.94898	3.80272
SLC48A1	194	194	26	2	0.888	0.936937	6.86017
GP9	47	47	18	1	1	1	4.89259
PLA2G4C	7	7	5	2	0.888889	0.9375	0.166667
IFITM3	95	95	8	2	0.970297	0.984694	5.08722
BBOF1	203	203	26	2	0.921162	0.957207	7.59234
ASGR2	90	90	8	2	0.924528	0.959184	4.34334
SGK1	140	140	0	2	0.926829	0.960526	7.75633
FBLN5	19	19	12	2	0.787879	0.865385	0.986009
FAM126B	141	141	0	2	0.932515	0.963816	7.56875
STAB1	90	90	8	2	0.924528	0.959184	4.52568
IFITM1	98	98	8	1	1	1	5.13985
GMNN	199	199	29	2	0.788406	0.865809	9.19759
CCNB2	233	233	29	2	0.874598	0.928309	12.3081
KBTBD11	1	1	14	1	1	1	0
ZBP1	90	90	8	2	0.924528	0.959184	3.79926
POLR1D	218	218	26	2	0.982301	0.990991	10.3413
DIP2A	4	4	22	1	1	1	0
TSPAN9	43	43	18	2	0.921569	0.957447	3.87782
HNRNPA3	224	224	29	2	0.85	0.911765	11.0871
APOBR	4	4	31	2	0.7	0.785714	0
FAXDC2	210	210	26	2	0.948718	0.972973	8.11944
C9orf78	217	217	26	2	0.977974	0.988739	10.1252
RBM38	211	211	26	2	0.95279	0.975225	9.87997
CKS2	254	254	29	2	0.937931	0.966912	17.9943
MCM10	243	243	29	2	0.903654	0.946691	15.0975
IFIT2	96	96	8	2	0.98	0.989796	5.08722
FAM153B	20	20	12	2	0.8125	0.884615	0.952791
MCM7	266	266	29	2	0.978417	0.988971	20.9432
OLFM4	212	212	29	2	0.819277	0.889706	13.0699
FAM214B	211	211	26	2	0.95279	0.975225	8.33678
GFUS	197	197	26	2	0.898785	0.943694	8.04363
NFIX	184	184	26	2	0.853846	0.914414	7.17457
DDX11L9	18	18	3	2	0.909091	0.95	1.23506
CXCR5	19	19	12	2	0.787879	0.865385	0.834736
POLL	215	215	26	2	0.969432	0.984234	9.43309
ZNF684	80	80	8	2	0.844828	0.908163	4.11844
KCNJ15	141	141	0	2	0.932515	0.963816	7.26317
MGAM2	134	134	0	2	0.894118	0.940789	6.32943
REM2	126	126	0	2	0.853933	0.914474	5.39095
BNIP3L	217	217	26	2	0.977974	0.988739	10.1206
EPHA1	26	26	12	1	1	1	5.35444
FHL1	1	1	10	1	1	1	0
SDHAP3	10	10	17	2	0.8125	0.884615	0.181818
H2AC8	7	7	4	2	0.888889	0.9375	0.983333
AQP10	47	47	18	1	1	1	4.89259
TNFRSF17	249	249	29	2	0.922034	0.957721	17.9503
JUP	86	86	8	2	0.890909	0.938776	4.06774
TRIP13	228	228	29	2	0.860759	0.919118	13.7919
XYLT1	215	215	26	2	0.969432	0.984234	9.52268
IFI6	89	89	8	2	0.915888	0.954082	3.65396
MPZL1	131	131	0	2	0.878613	0.930921	5.85111
TPM2	20	20	12	2	0.8125	0.884615	3.09279
TENT5C	220	220	26	2	0.991071	0.995495	10.3413
TMOD1	207	207	26	2	0.936709	0.966216	8.01844
GNA12	193	193	26	2	0.884462	0.934685	6.93059
HAVCR2	265	265	29	2	0.97491	0.987132	20.7917
PTGDR2	17	17	25	2	0.793103	0.869565	0.991771
ELANE	246	246	29	2	0.912752	0.952206	13.5517
H4C3	271	271	29	2	0.996337	0.998162	21.1551
NUSAP1	241	241	29	2	0.89769	0.943015	15.1938
ITGB3	37	37	18	2	0.824561	0.893617	1.18241
CPPED1	115	115	0	2	0.804233	0.878289	4.87077
GZMA	269	269	29	2	0.989091	0.994485	21.0629
TBC1D22B	197	197	26	2	0.898785	0.943694	7.54648
CHST12	246	246	29	2	0.912752	0.952206	18.1373
DEFA1	259	259	29	2	0.954386	0.976103	20.9088
NIBAN1	149	149	0	2	0.980645	0.990132	8.57918
CYP4F3	144	144	0	2	0.95	0.973684	7.75308
RETREG1	11	11	12	2	0.634146	0.711538	0.043478
EPHX2	19	19	12	2	0.787879	0.865385	1.46864
SEC11C	250	250	29	2	0.92517	0.959559	19.8331
DPCD	201	201	26	2	0.91358	0.952703	7.61421
MT1F	253	253	29	2	0.934708	0.965074	20.0832
OSM	135	135	0	2	0.899408	0.944079	6.39985
MYOF	90	90	8	2	0.924528	0.959184	4.12469
ANP32A	3	3	15	2	0.714286	0.8	0
HCG27	133	133	0	2	0.888889	0.9375	6.97638
KIF14	235	235	29	2	0.880259	0.931985	13.7316
APOBEC3H	235	235	29	2	0.880259	0.931985	13.7312
ARAP3	145	145	0	2	0.955975	0.976974	8.04968
CXCL5	36	36	18	2	0.810345	0.882979	1.40316
TNFSF13B	92	92	8	2	0.942308	0.969388	4.2415
NCAPG2	238	238	29	2	0.888889	0.9375	14.4912
SNCA	219	219	26	2	0.986667	0.993243	10.3367
MARCHF2	209	209	26	2	0.944681	0.970721	8.35512
GYPC	221	221	26	2	0.995516	0.997748	10.369
PLXNC1	140	140	0	2	0.926829	0.960526	6.65672
GABBR1	2	2	30	2	0.75	0.833333	0
PI3	209	209	26	2	0.944681	0.970721	7.98248
DYSF	144	144	0	2	0.95	0.973684	8.00495
CENPV	205	205	26	2	0.92887	0.961712	7.65733
CDC42EP2	18	18	3	2	0.909091	0.95	1.2273
H3C7	5	5	4	2	0.727273	0.8125	0.142857
HNRNPA2B1	265	265	29	2	0.97491	0.987132	21.0364
TAGLN	19	19	3	2	0.952381	0.975	1.28285
KLRF1	4	4	9	1	1	1	0
USP10	132	132	0	2	0.883721	0.934211	7.43996
NAPSB	16	16	3	2	0.833333	0.9	0.92835
SLC7A5	205	205	26	2	0.92887	0.961712	8.37801
HESX1	95	95	8	2	0.970297	0.984694	4.92001
MPO	254	254	29	2	0.937931	0.966912	17.9641
XIST	1	1	19	1	1	1	0
TRAV1	232	232	29	2	0.871795	0.926471	11.8002
ZNF23	197	197	26	2	0.898785	0.943694	7.28717
BEND2	1	1	10	1	1	1	0
CCNA2	227	227	29	2	0.858044	0.917279	10.9037
MYOM2	4	4	9	1	1	1	0
FOXO3	11	11	11	1	1	1	1.84127
TOX2	247	247	29	2	0.915825	0.954044	16.4688
GPBAR1	96	96	8	2	0.98	0.989796	4.86223
HPS1	199	199	26	2	0.906122	0.948198	7.4478
BLK	17	17	13	2	0.869565	0.925	1.36325
JAM3	41	41	18	2	0.886792	0.93617	3.51387
PYGL	139	139	0	2	0.921212	0.957237	7.59975
H2BC8	35	35	18	2	0.79661	0.87234	1.40759
CCR7	26	26	12	1	1	1	5.35444
ITGA2B	36	36	18	2	0.810345	0.882979	1.67928
ADM	148	148	0	2	0.974359	0.986842	8.47559
ALDH5A1	208	208	26	2	0.940678	0.968468	8.51906
SLC29A1	19	19	25	2	0.851852	0.913043	1.15551
NME1	257	257	29	2	0.947735	0.972426	19.9618
MGAM	138	138	0	2	0.915663	0.953947	6.7789
CXCR6	233	233	29	2	0.874598	0.928309	12.8256
CTSG	245	245	29	2	0.909699	0.950368	13.6186
IER3	139	139	0	2	0.921212	0.957237	7.09443
FBXO9	178	178	26	2	0.834586	0.900901	6.05566
APOBEC3G	263	263	29	2	0.967972	0.983456	20.8045
GPAT3	11	11	17	2	0.866667	0.923077	0.3
OTOF	3	3	28	2	0.8	0.875	0.333333
CDC34	211	211	26	2	0.95279	0.975225	8.33617
FCHO2	123	123	0	2	0.839779	0.904605	5.36809
PSMB2	263	263	29	2	0.967972	0.983456	20.8045
TLR10	17	17	13	2	0.869565	0.925	1.37067
SLC6A8	198	198	26	2	0.902439	0.945946	7.29984
BIRC5	222	222	29	2	0.84472	0.908088	11.5096
KIR2DL1	246	246	29	2	0.912752	0.952206	13.5047
MATK	263	263	29	2	0.967972	0.983456	20.7684
FBXO6	95	95	8	2	0.970297	0.984694	4.66982
ABCB9	230	230	29	2	0.866242	0.922794	12.0647
IL1RAP	131	131	0	2	0.878613	0.930921	5.76239
SMIM5	207	207	26	2	0.936709	0.966216	8.70527
VPREB3	15	15	13	2	0.8	0.875	1.1454
ESAM	36	36	18	2	0.810345	0.882979	1.52364
MMP9	144	144	0	2	0.95	0.973684	7.8098
PSG1	137	137	0	2	0.91018	0.950658	6.42237
DCAF12	221	221	26	2	0.995516	0.997748	10.3551
TNFRSF25	19	19	13	2	0.952381	0.975	4.92756
IRF5	3	3	16	2	0.8	0.875	0
OAS3	91	91	8	2	0.933333	0.964286	3.86306
TTTY14	23	23	25	1	1	1	1.77946
FECH	208	208	26	2	0.940678	0.968468	8.16297
PLIN4	129	129	0	2	0.868571	0.924342	6.15946
TLR1	5	5	15	1	1	1	1.83333
CREB5	142	142	0	2	0.938272	0.967105	7.64645
SLC27A2	234	234	29	2	0.877419	0.930147	14.3867
PSG9	7	7	31	1	1	1	1.25
AMY1C	214	214	29	2	0.824242	0.893382	14.6778
IL1R2	142	142	0	2	0.938272	0.967105	7.71537
HIP1	129	129	0	2	0.868571	0.924342	6.15946
CMTM2	150	150	0	2	0.987013	0.993421	8.53294
IKZF3	243	243	29	2	0.903654	0.946691	13.3846
MT1IP	237	237	29	2	0.885993	0.935662	13.3537
ASPM	232	232	29	2	0.871795	0.926471	11.5723
ANKRD55	1	1	14	1	1	1	0
CD8B	218	218	29	2	0.834356	0.900735	11.192
MKRN1	220	220	26	2	0.991071	0.995495	10.3553
BATF	252	252	29	2	0.931507	0.963235	17.8544
DPEP3	138	138	0	2	0.915663	0.953947	6.35074
SF1	13	13	17	1	1	1	0.481818
KIR3DL3	231	231	29	2	0.86901	0.924632	14.9416
ALPL	144	144	0	2	0.95	0.973684	7.95124
SDF2L1	261	261	29	2	0.961131	0.979779	20.7096
HCAR3	127	127	0	2	0.858757	0.917763	5.44464
ATAD2	245	245	29	2	0.909699	0.950368	13.5819
KLRD1	267	267	29	2	0.981949	0.990809	20.9831
CEACAM8	192	192	29	2	0.772727	0.852941	9.47135
BTNL8	4	4	27	2	0.833333	0.9	0.333333
TRBV29	17	17	13	2	0.869565	0.925	1.37067
SIGLEC5	5	5	31	2	0.777778	0.857143	0
CHI3L2	247	247	29	2	0.915825	0.954044	13.6602
PGLYRP1	140	140	0	2	0.926829	0.960526	6.37975
ASCL2	256	256	29	2	0.944444	0.970588	19.458
TMPO	201	201	29	2	0.793003	0.869485	10.5882
CENPS	202	202	29	2	0.795322	0.871324	12.2095
SLC25A37	221	221	26	2	0.995516	0.997748	10.369
TGFA	136	136	0	2	0.904762	0.947368	5.89987
NFIA	8	8	11	2	0.785714	0.863636	0.222222
GBP1	89	89	8	2	0.915888	0.954082	3.7006
FPR1	150	150	0	2	0.987013	0.993421	8.59958
LTBP3	20	20	12	2	0.8125	0.884615	0.952791
MYL4	210	210	26	2	0.948718	0.972973	9.91472
PPM1A	209	209	26	2	0.944681	0.970721	8.10452
GATA1	203	203	26	2	0.921162	0.957207	7.72872
GBGT1	191	191	26	2	0.87747	0.93018	7.37721
AGO2	11	11	11	1	1	1	1.84127
LMNB2	242	242	29	2	0.900662	0.944853	14.3266
FOLR3	141	141	0	2	0.932515	0.963816	7.62276
ABI3	255	255	29	2	0.941176	0.96875	18.5504
LST1	140	140	0	2	0.926829	0.960526	7.61528
SLAMF7	179	179	29	2	0.745205	0.829044	6.63832
LILRA5	5	5	15	1	1	1	1.83333
ZNF467	144	144	0	2	0.95	0.973684	7.76075
CD27	257	257	29	2	0.947735	0.972426	19.9312
DPM2	198	198	26	2	0.902439	0.945946	7.43277
VWCE	200	200	26	2	0.909836	0.95045	7.63966
HMMR	227	227	29	2	0.858044	0.917279	11.3522
TNRC6C	193	193	26	2	0.884462	0.934685	7.79973
H3C15	4	4	16	1	1	1	1
ENO2	19	19	12	2	0.787879	0.865385	0.986009
TSPAN33	44	44	18	2	0.94	0.968085	4.67701
HELZ2	90	90	8	2	0.924528	0.959184	3.75345
ISOC2	226	226	29	2	0.855346	0.915441	14.0265
TIMM10	14	14	6	1	1	1	0.24359
EZH2	222	222	29	2	0.84472	0.908088	10.3096
IDO1	15	15	25	2	0.741935	0.826087	0.937685
GNG11	46	46	18	2	0.979167	0.989362	4.84814
DHFR	237	237	29	2	0.885993	0.935662	13.405
ADIPOR1	219	219	26	2	0.986667	0.993243	10.346
H3C4	89	89	8	2	0.915888	0.954082	4.49608
SHARPIN	198	198	26	2	0.902439	0.945946	7.44139
CXCL8	17	17	3	2	0.869565	0.925	0.931662
MT1X	253	253	29	2	0.934708	0.965074	19.2555
ZWINT	248	248	29	2	0.918919	0.955882	15.9388
RSRC1	191	191	26	2	0.87747	0.93018	7.18705
GPR162	137	137	0	2	0.91018	0.950658	6.30115
OLIG1	21	21	25	2	0.92	0.956522	1.14057
HJURP	257	257	29	2	0.947735	0.972426	18.4559
GINS3	215	215	29	2	0.826748	0.895221	12.5345
ABLIM3	43	43	18	2	0.921569	0.957447	3.63871
IL7R	26	26	12	1	1	1	5.35444
GASK1B	5	5	31	2	0.777778	0.857143	0
NPL	212	212	26	2	0.956897	0.977477	8.95547
FBXL13	137	137	0	2	0.91018	0.950658	6.535
HEMGN	210	210	26	2	0.948718	0.972973	8.72308
KIF2C	250	250	29	2	0.92517	0.959559	16.9564
SIGLEC10	3	3	23	1	1	1	0
TRIM22	90	90	8	2	0.924528	0.959184	3.66873
IGLV8	225	225	29	2	0.852665	0.913603	12.7313
FAM157C	131	131	0	2	0.878613	0.930921	5.59571
MAK	135	135	0	2	0.899408	0.944079	6.56501
CHURC1	19	19	3	2	0.952381	0.975	1.41063
PLSCR1	87	87	8	2	0.899083	0.943878	4.21812
CCR1	86	86	8	2	0.890909	0.938776	3.63271
USP41	87	87	8	2	0.899083	0.943878	4.47367
LINC00243	138	138	0	2	0.915663	0.953947	6.53717
HIRIP3	245	245	29	2	0.909699	0.950368	14.5718
CDT1	250	250	29	2	0.92517	0.959559	17.3123
GALM	14	14	6	1	1	1	0.24359
ZER1	196	196	26	2	0.895161	0.941441	7.18142
MX2	91	91	8	2	0.933333	0.964286	3.73347
CTSL	92	92	8	2	0.942308	0.969388	4.49402
SLC45A4	140	140	0	2	0.926829	0.960526	6.65672
F5	138	138	0	2	0.915663	0.953947	6.2891
FIS1	210	210	26	2	0.948718	0.972973	8.38491
NT5C3AP1	71	71	8	2	0.784	0.862245	2.48175
RPS23	15	15	13	2	0.8	0.875	0.91243
SHMT1	231	231	29	2	0.86901	0.924632	12.8673
CCL8	93	93	8	2	0.951456	0.97449	4.61042
YBX3	221	221	26	2	0.995516	0.997748	10.369
SLC40A1	5	5	27	1	1	1	1.16667
LUCAT1	137	137	0	2	0.91018	0.950658	6.56172
CENPN	241	241	29	2	0.89769	0.943015	13.1173
GP1BB	47	47	18	1	1	1	4.89259
CD36	90	90	8	2	0.924528	0.959184	4.31084
TK1	241	241	29	2	0.89769	0.943015	12.7017
BTNL3	151	151	0	2	0.993464	0.996711	8.58365
USP32	12	12	17	2	0.928571	0.961538	0.181818
CA4	134	134	0	2	0.894118	0.940789	5.83234
PF4V1	7	7	4	2	0.888889	0.9375	0.709524
KRT23	137	137	0	2	0.91018	0.950658	6.02094
ADA	253	253	29	2	0.934708	0.965074	18.5736
TNS1	206	206	26	2	0.932773	0.963964	7.83844
LAIR2	14	14	6	1	1	1	0.24359
PGM5	3	3	27	2	0.714286	0.8	0
SORL1	150	150	0	2	0.987013	0.993421	8.53294
VNN3	144	144	0	2	0.95	0.973684	7.85649
CCNJL	131	131	0	2	0.878613	0.930921	6.31758
PYHIN1	261	261	29	2	0.961131	0.979779	20.6274
CD9	19	19	25	2	0.851852	0.913043	0.985304
CD93	137	137	0	2	0.91018	0.950658	7.5831
OLIG2	20	20	25	2	0.884615	0.934783	1.15551
SAMD3	265	265	29	2	0.97491	0.987132	20.8197
MT2A	93	93	8	2	0.951456	0.97449	4.52056
TGFBR3	267	267	29	2	0.981949	0.990809	20.9867
LAG3	250	250	29	2	0.92517	0.959559	18.4012
TNFAIP2	139	139	0	2	0.921212	0.957237	7.225
OPTN	203	203	26	2	0.921162	0.957207	8.13754
CAMK1	20	20	25	2	0.884615	0.934783	1.0353
GUCD1	210	210	26	2	0.948718	0.972973	9.92912
CYP4F12	21	21	25	2	0.92	0.956522	1.51835
LEF1	26	26	12	1	1	1	5.35444
IFIT1B	205	205	26	2	0.92887	0.961712	8.19876
MAP7	136	136	0	2	0.904762	0.947368	6.62497
PRR11	249	249	29	2	0.922034	0.957721	17.4037
AURKA	231	231	29	2	0.86901	0.924632	13.0844
CENPE	244	244	29	2	0.906667	0.948529	13.4018
TNFSF10	89	89	8	2	0.915888	0.954082	4.05044
BLVRB	201	201	26	2	0.91358	0.952703	9.11603
TRIM6	90	90	8	2	0.924528	0.959184	4.67222
ESPN	209	209	26	2	0.944681	0.970721	8.72424
EAPP	2	2	15	2	0.625	0.7	0
HBD	214	214	26	2	0.965217	0.981982	9.95868
TMEM121B	137	137	0	2	0.91018	0.950658	6.56172
TUBG1	236	236	29	2	0.883117	0.933824	14.0121
STAT1	14	14	6	1	1	1	0.24359
ADGRG1	268	268	29	2	0.985507	0.992647	21.0177
MT1A	91	91	8	2	0.933333	0.964286	4.03434
MYBPC3	126	126	0	2	0.853933	0.914474	5.39178
MBOAT7	135	135	0	2	0.899408	0.944079	7.50859
CEP55	240	240	29	2	0.894737	0.941176	13.1669
NSUN7	137	137	0	2	0.91018	0.950658	6.71273
S100A12	133	133	0	2	0.888889	0.9375	7.645
SAMD9L	88	88	8	2	0.907407	0.94898	3.70407
TRAV21	237	237	29	2	0.885993	0.935662	12.6641
CLEC12A	13	13	17	1	1	1	0.481818
GBP4	13	13	6	2	0.933333	0.964286	0.166667
GP6	30	30	18	2	0.734375	0.819149	1.0867
QPCT	144	144	0	2	0.95	0.973684	8.11956
ADGRE2	138	138	0	2	0.915663	0.953947	7.55593
APOBEC3A	4	4	31	2	0.7	0.785714	0
SCGB1C1	7	7	4	2	0.888889	0.9375	0.983333
RUBCNL	136	136	0	2	0.904762	0.947368	6.07433
STMN1	243	243	29	2	0.903654	0.946691	14.283
NFE2	220	220	26	2	0.991071	0.995495	10.3413
FBXO7	217	217	26	2	0.977974	0.988739	10.3368
CDK5R1	2	2	21	1	1	1	0
APOL6	13	13	6	2	0.933333	0.964286	0.076923
TMCC2	203	203	26	2	0.921162	0.957207	8.27364
IGF1R	134	134	0	2	0.894118	0.940789	5.91373
LINC01887	160	160	29	2	0.708333	0.794118	8.1939
GFOD2	198	198	26	2	0.902439	0.945946	7.52249
ALOX12	38	38	18	2	0.839286	0.904255	2.08325
IMPA2	137	137	0	2	0.91018	0.950658	7.20099
LGALS3	189	189	26	2	0.870588	0.925676	7.98852
SIPA1L2	133	133	0	2	0.888889	0.9375	6.01446
POLA1	236	236	29	2	0.883117	0.933824	13.4377
UTS2	1	1	19	1	1	1	0
BEST1	142	142	0	2	0.938272	0.967105	6.76739
IL4R	132	132	0	2	0.883721	0.934211	6.51121
OSBP2	207	207	26	2	0.936709	0.966216	8.08457
PTGS1	46	46	18	2	0.979167	0.989362	4.87085
H2BC6	7	7	5	2	0.888889	0.9375	0.166667
SMOX	205	205	26	2	0.92887	0.961712	7.77135
XK	195	195	26	2	0.891566	0.939189	7.09229
CD248	223	223	29	2	0.847352	0.909926	11.8952
PLGLB1	4	4	22	1	1	1	0
SERPING1	88	88	8	2	0.907407	0.94898	4.13564
TBC1D3L	135	135	0	2	0.899408	0.944079	6.55975
CA1	216	216	26	2	0.973684	0.986486	10.026
PARPBP	208	208	29	2	0.809524	0.882353	12.9668
NSG1	20	20	12	2	0.8125	0.884615	1.44469
AXIN2	17	17	12	2	0.742857	0.826923	0.834736
IL1RN	80	80	8	2	0.844828	0.908163	3.67782
CDC42EP3	4	4	15	2	0.833333	0.9	0.333333
SMIM1	212	212	26	2	0.956897	0.977477	9.94862
LINC00639	144	144	0	2	0.95	0.973684	7.60267
IFI35	91	91	8	2	0.933333	0.964286	3.94699
TMEM86B	183	183	26	2	0.850575	0.912162	6.91356
SBK1	259	259	29	2	0.954386	0.976103	19.752
SIGLEC1	95	95	8	2	0.970297	0.984694	4.92001
SKA1	266	266	29	2	0.978417	0.988971	20.2673
IGKV5	199	199	29	2	0.788406	0.865809	8.9483
KCTD14	14	14	6	1	1	1	0.24359
CLECL1	2	2	20	1	1	1	1
ANKRD9	201	201	26	2	0.91358	0.952703	8.20023
RTN1	197	197	26	2	0.898785	0.943694	7.32774
PID1	17	17	13	2	0.869565	0.925	1.27873
RTP5	218	218	29	2	0.834356	0.900735	11.8756
LIME1	269	269	29	2	0.989091	0.994485	21.0139
NAIP	2	2	1	1	1	1	0
CCL4	263	263	29	2	0.967972	0.983456	20.0856
MANSC1	137	137	0	2	0.91018	0.950658	6.24133
EPB42	205	205	26	2	0.92887	0.961712	9.30402
IGKV1D	253	253	29	2	0.934708	0.965074	20.7885
RAD51AP1	238	238	29	2	0.888889	0.9375	13.1238
IRS2	140	140	0	2	0.926829	0.960526	7.17965
LGALS2	3	3	5	2	0.615385	0.6875	0
GPR55	240	240	29	2	0.894737	0.941176	14.7184
H2BC4	8	8	5	1	1	1	1.83333
FASLG	237	237	29	2	0.885993	0.935662	13.2815
PITHD1	212	212	26	2	0.956897	0.977477	9.93314
DTX3L	91	91	8	2	0.933333	0.964286	4.31668
ATP2B1	12	12	17	2	0.928571	0.961538	0.3
HP	254	254	29	2	0.937931	0.966912	18.1284
TREML2	141	141	0	2	0.932515	0.963816	6.79504
SPARC	42	42	18	2	0.903846	0.946809	2.78482
LAP3	88	88	8	2	0.907407	0.94898	3.69161
RGS1	246	246	29	2	0.912752	0.952206	13.5823
CXCR3	236	236	29	2	0.883117	0.933824	13.1085
CYP1B1	16	16	13	2	0.833333	0.9	0.979097
TESPA1	10	10	11	2	0.916667	0.954545	1.61905
FCGR3A	3	3	15	2	0.714286	0.8	0
SRRD	204	204	26	2	0.925	0.959459	8.26182
CBX7	2	2	21	1	1	1	0
DHRS9	88	88	8	2	0.907407	0.94898	3.46279
RAP1GAP	196	196	26	2	0.895161	0.941441	7.72014
LRG1	143	143	0	2	0.944099	0.970395	7.71172
MT1G	92	92	8	2	0.942308	0.969388	4.56112
RBBP8	233	233	29	2	0.874598	0.928309	14.3639
TSPAN18	1	1	2	1	1	1	0
PDGFRB	90	90	8	2	0.924528	0.959184	4.42407
BMP6	40	40	18	2	0.87037	0.925532	2.11818
FCRL3	19	19	13	2	0.952381	0.975	4.92756
CD38	236	236	29	2	0.883117	0.933824	16.1383
JCHAIN	264	264	29	2	0.971429	0.985294	21.0058
UBALD1	195	195	26	2	0.891566	0.939189	7.39894
MIR646HG	145	145	0	2	0.955975	0.976974	7.75578
PLEKHF1	256	256	29	2	0.944444	0.970588	19.0554
ELAPOR1	200	200	26	2	0.909836	0.95045	7.66021
PANX2	134	134	0	2	0.894118	0.940789	6.20046
SPON2	244	244	29	2	0.906667	0.948529	15.4213
SLC1A5	206	206	26	2	0.932773	0.963964	8.25243
STAT2	95	95	8	2	0.970297	0.984694	4.70151
FFAR2	149	149	0	2	0.980645	0.990132	8.35816
PCLAF	247	247	29	2	0.915825	0.954044	16.44
FCRLA	16	16	13	2	0.833333	0.9	1.05529
TRGC2	260	260	29	2	0.957746	0.977941	19.7121
SH2D1B	231	231	29	2	0.86901	0.924632	14.1815
IL5RA	22	22	25	2	0.958333	0.978261	1.24612
RNASE6	15	15	3	2	0.8	0.875	0.788072
CDCA2	269	269	29	2	0.989091	0.994485	20.3874
ZRANB1	210	210	26	2	0.948718	0.972973	8.95889
SYTL2	4	4	22	1	1	1	0
CCL23	21	21	25	2	0.92	0.956522	1.1985
MOV10	85	85	8	2	0.882883	0.933673	4.20688
EBP	239	239	29	2	0.891803	0.939338	14.9811
ZNF683	242	242	29	2	0.900662	0.944853	16.0157
CFD	7	7	31	1	1	1	1.25
FKBP11	264	264	29	2	0.971429	0.985294	20.8266
CAMK1D	3	3	23	1	1	1	0
POC1A	229	229	29	2	0.863492	0.920956	11.9721
PTAFR	130	130	0	2	0.873563	0.927632	6.78372
LYAR	264	264	29	2	0.971429	0.985294	20.8885
CLDND2	253	253	29	2	0.934708	0.965074	18.381
DDX58	91	91	8	2	0.933333	0.964286	4.3245
MPP1	209	209	26	2	0.944681	0.970721	9.86158
NLRP12	142	142	0	2	0.938272	0.967105	7.70932
NEAT1	13	13	17	1	1	1	0.481818
SCD	243	243	29	2	0.903654	0.946691	13.7177
TNFRSF4	2	2	24	1	1	1	0
ABCC4	199	199	26	2	0.906122	0.948198	7.17121
STX3	146	146	0	2	0.962025	0.980263	8.0575
NR4A2	13	13	17	1	1	1	0.481818
PAQR4	233	233	29	2	0.874598	0.928309	12.4474
ADGRE4P	19	19	25	2	0.851852	0.913043	1.15551
HBA2	221	221	26	2	0.995516	0.997748	10.369
TIMD4	231	231	29	2	0.86901	0.924632	12.0533
CHAF1B	251	251	29	2	0.928328	0.961397	17.7103
RRAS2	190	190	29	2	0.768362	0.849265	8.98632
TAP1	14	14	6	1	1	1	0.24359
GFI1	252	252	29	2	0.931507	0.963235	16.9804
CAMP	243	243	29	2	0.903654	0.946691	19.7278
PLAAT4	268	268	29	2	0.985507	0.992647	21.0516
CCNB1	253	253	29	2	0.934708	0.965074	17.8325
HERC5	90	90	8	2	0.924528	0.959184	4.14923
LGALS3BP	13	13	6	2	0.933333	0.964286	0.076923
RAB2B	214	214	26	2	0.965217	0.981982	9.98515
ASCC2	221	221	26	2	0.995516	0.997748	10.3551
PHOSPHO1	198	198	26	2	0.902439	0.945946	7.43336
KLRC3	253	253	29	2	0.934708	0.965074	18.3842
IGHV3	243	243	29	2	0.903654	0.946691	16.2335
KLC3	214	214	26	2	0.965217	0.981982	9.40843
BLVRA	93	93	8	2	0.951456	0.97449	4.76883
RFX2	147	147	0	2	0.968153	0.983553	8.28033
CTNNAL1	204	204	26	2	0.925	0.959459	7.62297
ITM2C	252	252	29	2	0.931507	0.963235	18.5937
DONSON	230	230	29	2	0.866242	0.922794	12.773
SLC45A3	4	4	27	2	0.833333	0.9	0.333333
IRF7	84	84	8	2	0.875	0.928571	3.53785
DNAJB2	215	215	26	2	0.969432	0.984234	10.0167
SULF2	141	141	0	2	0.932515	0.963816	7.2744
TMCC1	132	132	0	2	0.883721	0.934211	5.77783
PIP5K1B	214	214	26	2	0.965217	0.981982	9.40456
CAMK1G	228	228	29	2	0.860759	0.919118	11.9721
PARP12	83	83	8	2	0.867257	0.923469	3.5248
SH3BGRL2	45	45	18	2	0.959184	0.978723	4.75021
RNF10	208	208	26	2	0.940678	0.968468	8.33965
YIPF6	11	11	11	1	1	1	1.84127
SLFN5	228	228	29	2	0.860759	0.919118	13.9658
PIM1	211	211	26	2	0.95279	0.975225	9.90349
FOXO4	155	155	26	2	0.768166	0.849099	6.19136
CDC7	232	232	29	2	0.871795	0.926471	12.3057
DLEU1	212	212	26	2	0.956897	0.977477	9.18146
NKG7	272	272	29	1	1	1	21.1588
SOCS1	92	92	8	2	0.942308	0.969388	4.56112
CCR6	23	23	12	2	0.896552	0.942308	4.6556
WARS1	90	90	8	2	0.924528	0.959184	3.80064
CCL2	92	92	8	2	0.942308	0.969388	4.58781
TRAK2	212	212	26	2	0.956897	0.977477	8.50791
LINC02555	96	96	8	2	0.98	0.989796	4.8028
TGM2	189	189	26	2	0.870588	0.925676	6.69583
ACRBP	46	46	18	2	0.979167	0.989362	4.87085
SCO2	89	89	8	2	0.915888	0.954082	3.70357
FAM72B	202	202	26	2	0.917355	0.954955	8.30416
FAM118A	257	257	29	2	0.947735	0.972426	19.2777
ALAS2	220	220	26	2	0.991071	0.995495	10.369
KLHL3	17	17	12	2	0.742857	0.826923	0.668134
SAMD9	85	85	8	2	0.882883	0.933673	3.21858
KRT1	209	209	26	2	0.944681	0.970721	8.26473
RFC4	256	256	29	2	0.944444	0.970588	18.6261
MCEMP1	138	138	0	2	0.915663	0.953947	7.09018
DENND5B	222	222	29	2	0.84472	0.908088	13.1955
FCRL6	234	234	29	2	0.877419	0.930147	11.7383
GINS2	243	243	29	2	0.903654	0.946691	13.5973
CTTN	41	41	18	2	0.886792	0.93617	2.89974
FCGBP	15	15	13	2	0.8	0.875	0.983859
TBC1D4	21	21	12	2	0.83871	0.903846	3.36469
TREML3P	18	18	3	2	0.909091	0.95	1.2273
TRIM23	10	10	11	2	0.916667	0.954545	1.61905
MYL9	41	41	18	2	0.886792	0.93617	2.59593
CTSW	240	240	29	2	0.894737	0.941176	17.2556
MS4A14	7	7	11	2	0.733333	0.818182	0.222222
PNPLA2	206	206	26	2	0.932773	0.963964	8.47599
MGLL	43	43	18	2	0.921569	0.957447	4.14009
TFF3	20	20	25	2	0.884615	0.934783	1.15551
MCOLN1	191	191	26	2	0.87747	0.93018	7.26915
OAS1	79	79	8	2	0.837607	0.903061	3.24824
CDCA8	235	235	29	2	0.880259	0.931985	13.0313
TUBB1	47	47	18	1	1	1	4.89259
TRIM5	93	93	8	2	0.951456	0.97449	4.54033
DSTYK	201	201	26	2	0.91358	0.952703	7.99252
SLC9A9	189	189	26	2	0.870588	0.925676	7.72483
PMP22	23	23	25	1	1	1	1.77946
KIR2DL4	248	248	29	2	0.918919	0.955882	16.6251
POLE2	223	223	29	2	0.847352	0.909926	10.6104
ODAD4	189	189	26	2	0.870588	0.925676	7.33806
SMIM24	201	201	26	2	0.91358	0.952703	7.99252
GLDC	233	233	29	2	0.874598	0.928309	12.8024
FBXO5	246	246	29	2	0.912752	0.952206	16.4414
CXCR1	133	133	0	2	0.888889	0.9375	7.55903
PTCRA	43	43	18	2	0.921569	0.957447	4.33662
ITLN1	187	187	26	2	0.863813	0.921171	7.3281
TACSTD2	7	7	31	1	1	1	1.25
CHEK1	231	231	29	2	0.86901	0.924632	14.0646
CMTM5	34	34	18	2	0.783333	0.861702	1.21874
CENPA	245	245	29	2	0.909699	0.950368	16.7402
CDK5RAP2	235	235	29	2	0.880259	0.931985	15.5779
ANKRD22	14	14	6	1	1	1	0.24359
GMPR	200	200	26	2	0.909836	0.95045	8.43109
LSMEM1	133	133	0	2	0.888889	0.9375	6.1925
MICAL2	200	200	26	2	0.909836	0.95045	7.99252
SLC2A5	228	228	29	2	0.860759	0.919118	11.7827
H2BC5	83	83	8	2	0.867257	0.923469	3.78238
MT1E	250	250	29	2	0.92517	0.959559	18.358
CD40LG	26	26	12	1	1	1	5.35444
HERC6	95	95	8	2	0.970297	0.984694	4.99825
CCN3	133	133	0	2	0.888889	0.9375	5.87449
ITGAX	141	141	0	2	0.932515	0.963816	8.1589
TYMP	79	79	8	2	0.837607	0.903061	3.99673
H2AC20	8	8	5	1	1	1	1.83333
RANBP10	213	213	26	2	0.961039	0.97973	8.96026
HDC	19	19	3	2	0.952381	0.975	1.28285
SEPTIN4	95	95	8	2	0.970297	0.984694	4.70765
DTL	250	250	29	2	0.92517	0.959559	16.9564
DEFA3	266	266	29	2	0.978417	0.988971	20.9432
ADGRG5	254	254	29	2	0.937931	0.966912	18.4592
CSAD	139	139	0	2	0.921212	0.957237	7.30403
AQP9	150	150	0	2	0.987013	0.993421	8.59958
TREM1	134	134	0	2	0.894118	0.940789	5.91373
CXCL16	146	146	0	2	0.962025	0.980263	7.92495
NELL2	26	26	12	1	1	1	5.35444
KLRC1	234	234	29	2	0.877419	0.930147	13.6562
RPS21	252	252	29	2	0.931507	0.963235	18.624
GPR160	3	3	27	2	0.714286	0.8	0
DLC1	5	5	27	1	1	1	1.16667
HBG1	220	220	26	2	0.991071	0.995495	10.3645
CADM1	235	235	29	2	0.880259	0.931985	13.4272
BPGM	201	201	26	2	0.91358	0.952703	7.81054
IRF4	228	228	29	2	0.860759	0.919118	11.3994
CCL4L2	4	4	28	1	1	1	0.666667
MFHAS1	8	8	11	2	0.785714	0.863636	0.222222
TPRA1	181	181	26	2	0.844106	0.907658	6.18518
SRXN1	201	201	26	2	0.91358	0.952703	7.70692
KLRC2	178	178	29	2	0.743169	0.827206	7.17463
CCNF	230	230	29	2	0.866242	0.922794	11.8992
KLHDC7B	94	94	8	2	0.960784	0.979592	4.6645
LTF	202	202	29	2	0.795322	0.871324	9.71368
PDE9A	91	91	8	2	0.933333	0.964286	4.52882
PINK1	203	203	26	2	0.921162	0.957207	8.53686
CYP27A1	138	138	0	2	0.915663	0.953947	6.52994
CX3CR1	265	265	29	2	0.97491	0.987132	21.0364
MEIS1	38	38	18	2	0.839286	0.904255	1.59945
DCAF6	195	195	26	2	0.891566	0.939189	6.88034
MX1	95	95	8	2	0.970297	0.984694	5.08722
TSPAN5	212	212	26	2	0.956897	0.977477	9.92244
ZADH2	4	4	22	1	1	1	0
ZDHHC11	7	7	11	2	0.733333	0.818182	0.222222
MARCHF8	204	204	26	2	0.925	0.959459	8.10686
PLEK2	191	191	26	2	0.87747	0.93018	6.86818
YOD1	209	209	26	2	0.944681	0.970721	8.25245
FCRL2	16	16	13	2	0.833333	0.9	1.21206
RNF24	142	142	0	2	0.938272	0.967105	7.77962
TGM3	141	141	0	2	0.932515	0.963816	7.22607
PTGS2	16	16	3	2	0.833333	0.9	0.658905
CERNA2	16	16	13	2	0.833333	0.9	0.979097
CD8B2	234	234	29	2	0.877419	0.930147	12.8163
KIAA1671	244	244	29	2	0.906667	0.948529	15.1501
TBC1D3C	140	140	0	2	0.926829	0.960526	7.02058
WDR45	206	206	26	2	0.932773	0.963964	7.79727
LY6E	76	76	8	2	0.816667	0.887755	3.20028
GNLY	272	272	29	1	1	1	21.1588
PPP2R5B	206	206	26	2	0.932773	0.963964	7.84247
LRRN3	24	24	12	2	0.928571	0.961538	4.69908
E2F2	213	213	26	2	0.961039	0.97973	9.89439
XPO7	210	210	26	2	0.948718	0.972973	8.69069
MAP3K7CL	213	213	26	2	0.961039	0.97973	9.9727
MMP24OS	12	12	17	2	0.928571	0.961538	0.181818
LDLR	252	252	29	2	0.931507	0.963235	18.429
CCL3L1	3	3	28	2	0.8	0.875	0.333333
TRPM6	126	126	0	2	0.853933	0.914474	5.47022
CCDC167	257	257	29	2	0.947735	0.972426	18.7425
H4C14	6	6	5	2	0.8	0.875	0
CARD16	96	96	8	2	0.98	0.989796	5.05049
PSMC3	254	254	29	2	0.937931	0.966912	18.6285
POU2AF1	233	233	29	2	0.874598	0.928309	12.2831
NUDT1	250	250	29	2	0.92517	0.959559	19.003
RNF19B	144	144	0	2	0.95	0.973684	7.33777
TPST1	139	139	0	2	0.921212	0.957237	7.12548
MTARC1	144	144	0	2	0.95	0.973684	7.07173
CRAT	201	201	26	2	0.91358	0.952703	9.0329
RIOK3	211	211	26	2	0.95279	0.975225	9.82005
C5AR1	143	143	0	2	0.944099	0.970395	7.81439
CCNE2	234	234	29	2	0.877419	0.930147	13.7128
INKA2	143	143	0	2	0.944099	0.970395	7.71351
NEXN	88	88	8	2	0.907407	0.94898	4.07898
MXI1	180	180	26	2	0.840909	0.905405	6.46189
SEM1	243	243	29	2	0.903654	0.946691	13.1416
UBE2T	217	217	29	2	0.831804	0.898897	10.2443
NBPF8	2	2	30	2	0.75	0.833333	0
LINC01001	131	131	0	2	0.878613	0.930921	5.59571
ANKRD20A11P	20	20	25	2	0.884615	0.934783	1.0353
P2RY14	19	19	3	2	0.952381	0.975	1.35271
MAF1	197	197	26	2	0.898785	0.943694	7.82701
BSG	204	204	26	2	0.925	0.959459	9.77298
SLC25A39	220	220	26	2	0.991071	0.995495	10.3645
SULT1B1	132	132	0	2	0.883721	0.934211	5.78887
RAB27B	43	43	18	2	0.921569	0.957447	4.5726
C3AR1	92	92	8	2	0.942308	0.969388	4.37672
GZMH	268	268	29	2	0.985507	0.992647	21.0516
OAS2	90	90	8	2	0.924528	0.959184	4.11153
CSF2RB	133	133	0	2	0.888889	0.9375	5.81285
RAB3IL1	188	188	26	2	0.867188	0.923423	6.54548
EOMES	264	264	29	2	0.971429	0.985294	20.9238
CENPW	201	201	29	2	0.793003	0.869485	10.1803
NDC80	234	234	29	2	0.877419	0.930147	13.1478
GPR146	197	197	26	2	0.898785	0.943694	7.30823
OR2W3	202	202	26	2	0.917355	0.954955	8.02938
MAD2L1	236	236	29	2	0.883117	0.933824	13.5135
CACNA1I	15	15	12	2	0.702703	0.788462	0.438967
SPATS2L	87	87	8	2	0.899083	0.943878	4.28146
CRISPLD2	145	145	0	2	0.955975	0.976974	7.91805
DEF8	146	146	0	2	0.962025	0.980263	7.97217
FAM210B	210	210	26	2	0.948718	0.972973	9.39077
CA2	192	192	26	2	0.880952	0.932432	7.44494
ELOF1	174	174	26	2	0.822222	0.891892	6.93565
BCL2L1	220	220	26	2	0.991071	0.995495	10.3505
CKAP2L	267	267	29	2	0.981949	0.990809	20.2711
UHRF1	222	222	29	2	0.84472	0.908088	11.6924
CR1	204	204	26	2	0.925	0.959459	7.88057
CLC	23	23	25	1	1	1	1.77946
HGD	17	17	3	2	0.869565	0.925	1.23506
TCP11L2	13	13	17	1	1	1	0.481818
STK39	262	262	29	2	0.964539	0.981618	20.451
NIBAN3	17	17	13	2	0.869565	0.925	1.60135
GMPPB	212	212	29	2	0.819277	0.889706	9.89408
CES3	179	179	26	2	0.837736	0.903153	6.12286
ATF3	89	89	8	2	0.915888	0.954082	4.36729
CTDSPL	42	42	18	2	0.903846	0.946809	3.42303
IFI44	90	90	8	2	0.924528	0.959184	3.98876
DPEP2	141	141	0	2	0.932515	0.963816	7.726
AKR1C3	4	4	9	1	1	1	0
SERPINE2	35	35	18	2	0.79661	0.87234	1.40257
CCDC102A	229	229	29	2	0.863492	0.920956	13.3869
C2orf88	193	193	26	2	0.884462	0.934685	8.16958
ALYREF	250	250	29	2	0.92517	0.959559	18.6566
HOPX	257	257	29	2	0.947735	0.972426	20.6878
SLC38A5	170	170	26	2	0.810219	0.882883	5.71316
MS4A3	199	199	26	2	0.906122	0.948198	7.57863
RYBP	19	19	3	2	0.952381	0.975	1.2601
CLEC1B	43	43	18	2	0.921569	0.957447	4.65018
DCUN1D1	9	9	11	2	0.846154	0.909091	1.61905
ATG16L2	133	133	0	2	0.888889	0.9375	7.56173
CPA3	19	19	3	2	0.952381	0.975	1.35271
IFNLR1	215	215	29	2	0.826748	0.895221	11.2751
SCGB3A1	2	2	24	1	1	1	0
H2AX	242	242	29	2	0.900662	0.944853	14.2739
CAV1	225	225	29	2	0.852665	0.913603	13.8238
NLRP2	231	231	29	2	0.86901	0.924632	14.0242
HRK	19	19	25	2	0.851852	0.913043	1.10493
ANKDD1A	228	228	29	2	0.860759	0.919118	12.4341
CAVIN2	45	45	18	2	0.959184	0.978723	4.84814
STRADB	217	217	26	2	0.977974	0.988739	10.3413
TSC22D3	150	150	0	2	0.987013	0.993421	8.58594
CDC20	238	238	29	2	0.888889	0.9375	14.1834
CLEC2B	250	250	29	2	0.92517	0.959559	18.5688
FAM104A	210	210	26	2	0.948718	0.972973	9.87541
MBNL3	209	209	26	2	0.944681	0.970721	8.25245
GZMB	266	266	29	2	0.978417	0.988971	21.0364
HBG2	221	221	26	2	0.995516	0.997748	10.369
TMPRSS9	206	206	26	2	0.932773	0.963964	8.37455
TUBB2A	208	208	26	2	0.940678	0.968468	8.49357
S1PR5	258	258	29	2	0.951049	0.974265	20.1502
NOD2	12	12	17	2	0.928571	0.961538	0.3
ADGRE1	20	20	25	2	0.884615	0.934783	1.0353
MS4A1	14	14	13	2	0.769231	0.85	1.0204
UBE2L6	96	96	8	2	0.98	0.989796	5.08722
KIR2DL3	255	255	29	2	0.941176	0.96875	18.526
VWF	43	43	18	2	0.921569	0.957447	3.63871
PARP9	91	91	8	2	0.933333	0.964286	4.03434
AHSP	220	220	26	2	0.991071	0.995495	10.3505
CRYBB2P1	4	4	9	1	1	1	0
MCM4	241	241	29	2	0.89769	0.943015	14.0563
BANK1	5	5	13	2	0.571429	0.625	0.052632
C4BPA	9	9	11	2	0.846154	0.909091	0.507937
GSTA5	222	222	26	1	1	1	10.3781
NPRL3	210	210	26	2	0.948718	0.972973	8.50088
HMBS	204	204	26	2	0.925	0.959459	7.94281
PDE5A	38	38	18	2	0.839286	0.904255	3.25279
TPM1	6	6	4	2	0.8	0.875	0.309524
PADI4	143	143	0	2	0.944099	0.970395	7.91457
RRM1	264	264	29	2	0.971429	0.985294	20.6772
MELK	224	224	29	2	0.85	0.911765	10.9021
ROGDI	199	199	26	2	0.906122	0.948198	7.53746
TANGO2	202	202	26	2	0.917355	0.954955	7.59944
ABCC13	202	202	26	2	0.917355	0.954955	8.63894
CCR3	23	23	25	1	1	1	1.77946
RNF213	90	90	8	2	0.924528	0.959184	4.31351
TMEM158	6	6	4	2	0.8	0.875	0.309524
EPSTI1	92	92	8	2	0.942308	0.969388	4.02197
MIR181A2HG	4	4	22	1	1	1	0
FANCI	244	244	29	2	0.906667	0.948529	16.1819
AP2A1	197	197	26	2	0.898785	0.943694	7.07467
IL11RA	3	3	30	1	1	1	0.5
HAL	135	135	0	2	0.899408	0.944079	5.95892
BACH2	14	14	12	2	0.684211	0.769231	0.789744
FGFBP2	267	267	29	2	0.981949	0.990809	20.9835
CARM1	217	217	26	2	0.977974	0.988739	10.1068
KIF15	228	228	29	2	0.860759	0.919118	13.387
RUNDC3A	192	192	26	2	0.880952	0.932432	7.07214
FOS	140	140	0	2	0.926829	0.960526	7.53947
AIM2	92	92	8	2	0.942308	0.969388	4.13327
CASP5	6	6	5	2	0.8	0.875	0
CDCA7	248	248	29	2	0.918919	0.955882	17.9127
RPGRIP1	136	136	0	2	0.904762	0.947368	6.90684
C17orf97	4	4	16	1	1	1	1
RETN	3	3	28	2	0.8	0.875	0.333333
NFXL1	198	198	26	2	0.902439	0.945946	7.14811
CMPK2	88	88	8	2	0.907407	0.94898	4.20943
PARP14	90	90	8	2	0.924528	0.959184	3.76195
DSC2	3	3	23	1	1	1	0
CD160	240	240	29	2	0.894737	0.941176	16.0533
CD79A	20	20	13	1	1	1	4.9802
NAT8B	32	32	18	2	0.758065	0.840426	0.937537
CLEC4D	7	7	31	1	1	1	1.25
HBQ1	220	220	26	2	0.991071	0.995495	10.3413
ARG1	134	134	0	2	0.894118	0.940789	6.35444
CNPPD1	205	205	26	2	0.92887	0.961712	8.09962
EPB41	187	187	26	2	0.863813	0.921171	7.35098
H2BC9	3	3	16	2	0.8	0.875	0
TUBB	266	266	29	2	0.978417	0.988971	21.0101
MND1	260	260	29	2	0.957746	0.977941	19.6107
CD19	15	15	13	2	0.8	0.875	0.983859
BCL11A	20	20	13	1	1	1	4.9802
XAF1	83	83	8	2	0.867257	0.923469	3.48801
TLR5	137	137	0	2	0.91018	0.950658	6.25563
FRMD3	2	2	16	2	0.666667	0.75	0
TMEM63B	214	214	26	2	0.965217	0.981982	9.40843
LILRA1	2	2	1	1	1	1	0
UBE2O	214	214	26	2	0.965217	0.981982	9.17191
ITGB5	44	44	18	2	0.94	0.968085	4.64791
COL18A1	134	134	0	2	0.894118	0.940789	6.44273
SLC4A1	208	208	26	2	0.940678	0.968468	9.49133

## Sheet: YFV
Id	Degree	modularity_class	Eccentricity	closnesscentrality	harmonicclosnesscentrality	betweenesscentrality
RPS29	1	0	2	0.500257	0.500513	0
IGKC	1	1	2	0.501124	0.502242	0
IGHM	1	1	2	0.501124	0.502242	0
S100A8	1	2	2	0.503704	0.507353	0
LYZ	1	3	2	0.50137	0.502732	0
RPS28	1	4	2	0.500876	0.501748	0
ITGB2	1	0	2	0.500257	0.500513	0
IGHA1	1	1	2	0.501124	0.502242	0
IFITM3	1	5	2	0.502857	0.505682	0
RPL34	1	0	2	0.500257	0.500513	0
S100A9	1	2	2	0.503704	0.507353	0
RPL7A	1	0	2	0.500257	0.500513	0
HLA-C	1	0	2	0.500257	0.500513	0
IER3	1	6	2	0.501193	0.502381	0
TXNIP	1	0	2	0.500257	0.500513	0
CD52	1	4	2	0.500876	0.501748	0
RPL10	1	6	2	0.501193	0.502381	0
HLA-DRB1	1	6	2	0.501193	0.502381	0
JUNB	1	0	2	0.500257	0.500513	0
FTH1	1	0	2	0.500257	0.500513	0
GRN	1	2	2	0.503704	0.507353	0
RPL23	1	0	2	0.500257	0.500513	0
PPP1R15A	1	0	2	0.500257	0.500513	0
NRGN	1	7	2	0.50137	0.502732	0
CEBPB	1	0	2	0.500257	0.500513	0
HBB	1	0	2	0.500257	0.500513	0
IFI27	1	1	2	0.501124	0.502242	0
TYROBP	1	6	2	0.501193	0.502381	0
CTSD	1	2	2	0.503704	0.507353	0
FCN1	1	6	2	0.501193	0.502381	0
JCHAIN	1	1	2	0.501124	0.502242	0
MT2A	1	5	2	0.502857	0.505682	0
ISG15	1	5	2	0.502857	0.505682	0
PLAUR	1	0	2	0.500257	0.500513	0
CST3	1	6	2	0.501193	0.502381	0
MX1	1	5	2	0.502857	0.505682	0
GNLY	1	4	2	0.500876	0.501748	0
RASSF5	1	0	2	0.500257	0.500513	0
CSNK1G2	1	0	2	0.500257	0.500513	0
RPS7	1	0	2	0.500257	0.500513	0
NAMPT	1	3	2	0.50137	0.502732	0
ISG20	1	5	2	0.502857	0.505682	0
ARL8A	1	0	2	0.500257	0.500513	0
MORF4L1	1	0	2	0.500257	0.500513	0
DUSP6	1	0	2	0.500257	0.500513	0
PFKFB3	1	0	2	0.500257	0.500513	0
SPON2	1	4	2	0.500876	0.501748	0
ARPC3	1	0	2	0.500257	0.500513	0
IGLC2	1	1	2	0.501124	0.502242	0
CDC42SE1	1	0	2	0.500257	0.500513	0
CAPG	1	2	2	0.503704	0.507353	0
TMSB4X	1	0	2	0.500257	0.500513	0
CCL5	1	4	2	0.500876	0.501748	0
MT-TL1	1	4	2	0.500876	0.501748	0
MIR23AHG	1	6	2	0.501193	0.502381	0
LY6E	1	5	2	0.502857	0.505682	0
RPL23A	1	0	2	0.500257	0.500513	0
AIF1	1	3	2	0.50137	0.502732	0
PF4	1	7	2	0.50137	0.502732	0
SRF	1	0	2	0.500257	0.500513	0
TAMALIN	1	4	2	0.500876	0.501748	0
MAP2K3	1	0	2	0.500257	0.500513	0
PDIA6	1	0	2	0.500257	0.500513	0
CARD19	1	0	2	0.500257	0.500513	0
HELZ2	1	5	2	0.502857	0.505682	0
LILRB2	1	6	2	0.501193	0.502381	0
ADAM8	1	0	2	0.500257	0.500513	0
AP1S2	1	6	2	0.501193	0.502381	0
PFN1	1	0	2	0.500257	0.500513	0
PLBD1	1	3	2	0.50137	0.502732	0
ACTN4	1	0	2	0.500257	0.500513	0
GNB2	1	0	2	0.500257	0.500513	0
HNRNPF	1	0	2	0.500257	0.500513	0
RGS2	1	0	2	0.500257	0.500513	0
RNASE2	1	5	2	0.502857	0.505682	0
HSPA1A	1	0	2	0.500257	0.500513	0
PRF1	1	4	2	0.500876	0.501748	0
RGS1	1	0	2	0.500257	0.500513	0
CDKN2D	1	0	2	0.500257	0.500513	0
MX2	1	5	2	0.502857	0.505682	0
DUSP2	1	0	2	0.500257	0.500513	0
IL32	1	4	2	0.500876	0.501748	0
CSTA	1	6	2	0.501193	0.502381	0
CD300E	1	6	2	0.501193	0.502381	0
RPL10P9	1	4	2	0.500876	0.501748	0
NR4A2	1	3	2	0.50137	0.502732	0
HSP90B1	1	0	2	0.500257	0.500513	0
S100A12	1	2	2	0.503704	0.507353	0
CCL3L1	1	6	2	0.501193	0.502381	0
IGLC3	1	1	2	0.501124	0.502242	0
NINJ1	1	6	2	0.501193	0.502381	0
RSRP1	1	0	2	0.500257	0.500513	0
IGHG4	1	1	2	0.501124	0.502242	0
RPL4	1	0	2	0.500257	0.500513	0
PLIN2	1	0	2	0.500257	0.500513	0
FCGRT	1	6	2	0.501193	0.502381	0
GRINA	1	2	2	0.503704	0.507353	0
TNFAIP2	1	0	2	0.500257	0.500513	0
SLC43A2	1	3	2	0.50137	0.502732	0
MAFB	1	3	2	0.50137	0.502732	0
CPNE5	1	4	2	0.500876	0.501748	0
ITGB3	1	7	2	0.50137	0.502732	0
CD83	1	6	2	0.501193	0.502381	0
RPL21	1	0	2	0.500257	0.500513	0
HCK	1	0	2	0.500257	0.500513	0
COMMD6	1	0	2	0.500257	0.500513	0
VNN2	1	3	2	0.50137	0.502732	0
MPO	1	1	2	0.501124	0.502242	0
EMP1	1	0	2	0.500257	0.500513	0
IFNGR2	1	0	2	0.500257	0.500513	0
MPEG1	1	6	2	0.501193	0.502381	0
GAB2	1	6	2	0.501193	0.502381	0
HLA-DQB1	1	3	2	0.50137	0.502732	0
TMEM176B	1	6	2	0.501193	0.502381	0
IGHG3	1	1	2	0.501124	0.502242	0
GZMA	1	0	2	0.500257	0.500513	0
MAP3K8	1	0	2	0.500257	0.500513	0
SIGLEC1	1	5	2	0.502857	0.505682	0
PTGER4	1	0	2	0.500257	0.500513	0
MTND1P23	1	0	2	0.500257	0.500513	0
SOD2	1	0	2	0.500257	0.500513	0
PREX1	1	0	2	0.500257	0.500513	0
SUSD6	1	0	2	0.500257	0.500513	0
OAS2	1	5	2	0.502857	0.505682	0
CEBPD	1	3	2	0.50137	0.502732	0
PPIF	1	0	2	0.500257	0.500513	0
OAS3	1	5	2	0.502857	0.505682	0
CD69	1	0	2	0.500257	0.500513	0
YWHAE	1	0	2	0.500257	0.500513	0
MCEMP1	1	2	2	0.503704	0.507353	0
OCIAD1	1	0	2	0.500257	0.500513	0
DNMT1	1	0	2	0.500257	0.500513	0
HBEGF	1	3	2	0.50137	0.502732	0
IFI16	1	0	2	0.500257	0.500513	0
TCF7	1	4	2	0.500876	0.501748	0
VCAN	1	3	2	0.50137	0.502732	0
PRPF8	1	0	2	0.500257	0.500513	0
RCC2	1	0	2	0.500257	0.500513	0
BCL2A1	1	0	2	0.500257	0.500513	0
CLEC7A	1	3	2	0.50137	0.502732	0
SLC7A7	1	0	2	0.500257	0.500513	0
NFAM1	1	6	2	0.501193	0.502381	0
GRAP2	1	7	2	0.50137	0.502732	0
ADM	1	2	2	0.503704	0.507353	0
OAS1	1	5	2	0.502857	0.505682	0
HMOX1	1	2	2	0.503704	0.507353	0
PELI1	1	0	2	0.500257	0.500513	0
CLU	1	2	2	0.503704	0.507353	0
E2F2	1	1	2	0.501124	0.502242	0
GZMB	1	7	2	0.50137	0.502732	0
SLC25A5	1	0	2	0.500257	0.500513	0
PRNP	1	0	2	0.500257	0.500513	0
IFIT3	1	5	2	0.502857	0.505682	0
C9orf78	1	0	2	0.500257	0.500513	0
KLF4	1	0	2	0.500257	0.500513	0
EPSTI1	1	0	2	0.500257	0.500513	0
IFI44L	1	5	2	0.502857	0.505682	0
TGFBI	1	6	2	0.501193	0.502381	0
PPBP	1	7	2	0.50137	0.502732	0
PHLDA2	1	6	2	0.501193	0.502381	0
IL1R2	1	1	2	0.501124	0.502242	0
IGHA2	1	1	2	0.501124	0.502242	0
IRF7	1	5	2	0.502857	0.505682	0
JUP	1	0	2	0.500257	0.500513	0
CFD	1	6	2	0.501193	0.502381	0
PDIA4	1	0	2	0.500257	0.500513	0
TAP2	1	0	2	0.500257	0.500513	0
THBS1	1	0	2	0.500257	0.500513	0
PHC2	1	0	2	0.500257	0.500513	0
CAMK1	1	6	2	0.501193	0.502381	0
JAML	1	6	2	0.501193	0.502381	0
RARA	1	0	2	0.500257	0.500513	0
SLA	1	0	2	0.500257	0.500513	0
CXCL8	1	3	2	0.50137	0.502732	0
C19orf38	1	6	2	0.501193	0.502381	0
LILRA5	1	2	2	0.503704	0.507353	0
CSTB	1	0	2	0.500257	0.500513	0
LST1	1	3	2	0.50137	0.502732	0
JDP2	1	2	2	0.503704	0.507353	0
DYSF	1	2	2	0.503704	0.507353	0
NOP10	1	0	2	0.500257	0.500513	0
FGFBP2	1	7	2	0.50137	0.502732	0
CMPK2	1	5	2	0.502857	0.505682	0
G0S2	1	0	2	0.500257	0.500513	0
RPL22L1	1	0	2	0.500257	0.500513	0
RSAD2	1	5	2	0.502857	0.505682	0
CCR7	1	0	2	0.500257	0.500513	0
HBA2	1	7	2	0.50137	0.502732	0
CD38	1	5	2	0.502857	0.505682	0
COX17	1	0	2	0.500257	0.500513	0
DRAP1	1	0	2	0.500257	0.500513	0
LMNA	1	4	2	0.500876	0.501748	0
GZMK	1	0	2	0.500257	0.500513	0
DAP	1	0	2	0.500257	0.500513	0
EIF4A3	1	0	2	0.500257	0.500513	0
RAB3D	1	6	2	0.501193	0.502381	0
CD79A	1	4	2	0.500876	0.501748	0
CD163	1	1	2	0.501124	0.502242	0
NLRP3	1	6	2	0.501193	0.502381	0
ITGB2-AS1	1	6	2	0.501193	0.502381	0
CXCL16	1	6	2	0.501193	0.502381	0
AHCTF1	1	0	2	0.500257	0.500513	0
PTAFR	1	3	2	0.50137	0.502732	0
CST7	1	4	2	0.500876	0.501748	0
LRP1	1	3	2	0.50137	0.502732	0
SNRPG	1	0	2	0.500257	0.500513	0
CSF1R	1	6	2	0.501193	0.502381	0
FGL2	1	3	2	0.50137	0.502732	0
RRP12	1	6	2	0.501193	0.502381	0
ETFA	1	0	2	0.500257	0.500513	0
SEC61B	1	0	2	0.500257	0.500513	0
ZAP70	1	4	2	0.500876	0.501748	0
HLA-DRB6	1	4	2	0.500876	0.501748	0
POLR2B	1	0	2	0.500257	0.500513	0
CD300A	1	0	2	0.500257	0.500513	0
SEC61G	1	0	2	0.500257	0.500513	0
MID1IP1	1	0	2	0.500257	0.500513	0
RASSF4	1	6	2	0.501193	0.502381	0
CCL4L2	1	0	2	0.500257	0.500513	0
METTL7A	1	0	2	0.500257	0.500513	0
HLA-DRB5	1	6	2	0.501193	0.502381	0
CHMP5	1	0	2	0.500257	0.500513	0
TREM1	1	6	2	0.501193	0.502381	0
CKLF	1	0	2	0.500257	0.500513	0
FARSA	1	4	2	0.500876	0.501748	0
UBE2B	1	0	2	0.500257	0.500513	0
CD48	1	0	2	0.500257	0.500513	0
H1-0	1	1	2	0.501124	0.502242	0
ITGAX	1	0	2	0.500257	0.500513	0
IFI35	1	5	2	0.502857	0.505682	0
RNPS1	1	0	2	0.500257	0.500513	0
RBM5	1	0	2	0.500257	0.500513	0
MZB1	1	1	2	0.501124	0.502242	0
GTF3C1	1	0	2	0.500257	0.500513	0
SOCS3	1	0	2	0.500257	0.500513	0
RASGEF1B	1	3	2	0.50137	0.502732	0
SERPING1	1	5	2	0.502857	0.505682	0
SLC35E2B	1	4	2	0.500876	0.501748	0
RASA3	1	0	2	0.500257	0.500513	0
ACRBP	1	7	2	0.50137	0.502732	0
C1QA	1	5	2	0.502857	0.505682	0
SAMSN1	1	0	2	0.500257	0.500513	0
SMS	1	0	2	0.500257	0.500513	0
CNIH4	1	0	2	0.500257	0.500513	0
RPL6	1	0	2	0.500257	0.500513	0
JAK3	1	4	2	0.500876	0.501748	0
AAMP	1	0	2	0.500257	0.500513	0
LILRA2	1	6	2	0.501193	0.502381	0
FAR1	1	0	2	0.500257	0.500513	0
FAM117A	1	0	2	0.500257	0.500513	0
LILRB3	1	6	2	0.501193	0.502381	0
PTGS2	1	3	2	0.50137	0.502732	0
HES4	1	4	2	0.500876	0.501748	0
SMPD4	1	4	2	0.500876	0.501748	0
MANF	1	0	2	0.500257	0.500513	0
TRAM1	1	0	2	0.500257	0.500513	0
ACSL1	1	0	2	0.500257	0.500513	0
GADD45G	1	6	2	0.501193	0.502381	0
CDA	1	6	2	0.501193	0.502381	0
FAM20C	1	2	2	0.503704	0.507353	0
HOMER3	1	6	2	0.501193	0.502381	0
CD300LB	1	6	2	0.501193	0.502381	0
SELENOS	1	0	2	0.500257	0.500513	0
OTOF	1	1	2	0.501124	0.502242	0
CTTN	1	7	2	0.50137	0.502732	0
IFIT1	1	5	2	0.502857	0.505682	0
HEXB	1	0	2	0.500257	0.500513	0
TNFSF10	1	5	2	0.502857	0.505682	0
HLA-F	1	0	2	0.500257	0.500513	0
IGHG1	1	1	2	0.501124	0.502242	0
APOBEC3A	1	2	2	0.503704	0.507353	0
H1-2	1	0	2	0.500257	0.500513	0
STAB1	1	2	2	0.503704	0.507353	0
SELENOF	1	0	2	0.500257	0.500513	0
CSF3R	1	6	2	0.501193	0.502381	0
MGST3	1	0	2	0.500257	0.500513	0
PIP4K2C	1	0	2	0.500257	0.500513	0
CD5	1	4	2	0.500876	0.501748	0
B4GALT5	1	0	2	0.500257	0.500513	0
SPARC	1	7	2	0.50137	0.502732	0
SMC4	1	0	2	0.500257	0.500513	0
BST1	1	6	2	0.501193	0.502381	0
IL1B	1	0	2	0.500257	0.500513	0
IDH1	1	0	2	0.500257	0.500513	0
SNORD13	1	4	2	0.500876	0.501748	0
RAB8B	1	0	2	0.500257	0.500513	0
ATP2B1-AS1	1	3	2	0.50137	0.502732	0
RRM2	1	1	2	0.501124	0.502242	0
ACAP1	1	4	2	0.500876	0.501748	0
GAS2L1	1	7	2	0.50137	0.502732	0
VDAC1	1	0	2	0.500257	0.500513	0
SYVN1	1	0	2	0.500257	0.500513	0
RWDD1	1	0	2	0.500257	0.500513	0
DDX50	1	0	2	0.500257	0.500513	0
PLXNB2	1	6	2	0.501193	0.502381	0
GZMH	1	4	2	0.500876	0.501748	0
PTGES	1	6	2	0.501193	0.502381	0
ARAP1	1	0	2	0.500257	0.500513	0
IRAK3	1	3	2	0.50137	0.502732	0
C5AR1	1	3	2	0.50137	0.502732	0
STK17A	1	0	2	0.500257	0.500513	0
MYBL2	1	1	2	0.501124	0.502242	0
NR4A3	1	6	2	0.501193	0.502381	0
SNRPF	1	0	2	0.500257	0.500513	0
TUBB1	1	7	2	0.50137	0.502732	0
POU2AF1	1	1	2	0.501124	0.502242	0
PHC3	1	0	2	0.500257	0.500513	0
PROK2	1	0	2	0.500257	0.500513	0
TIGIT	1	4	2	0.500876	0.501748	0
GMPR	1	5	2	0.502857	0.505682	0
ADGRG1	1	0	2	0.500257	0.500513	0
PHLDA1	1	3	2	0.50137	0.502732	0
MCOLN2	1	0	2	0.500257	0.500513	0
TAF1	1	0	2	0.500257	0.500513	0
SELENOT	1	0	2	0.500257	0.500513	0
LTBP3	1	4	2	0.500876	0.501748	0
VSIG4	1	1	2	0.501124	0.502242	0
CTSL	1	0	2	0.500257	0.500513	0
CCDC12	1	0	2	0.500257	0.500513	0
MT-TM	1	4	2	0.500876	0.501748	0
GASK1B	1	3	2	0.50137	0.502732	0
COMT	1	0	2	0.500257	0.500513	0
ATP5F1C	1	0	2	0.500257	0.500513	0
CHKA	1	0	2	0.500257	0.500513	0
MAPRE1	1	0	2	0.500257	0.500513	0
ID3	1	0	2	0.500257	0.500513	0
RRN3	1	0	2	0.500257	0.500513	0
OSCAR	1	2	2	0.503704	0.507353	0
HMGB2	1	0	2	0.500257	0.500513	0
SEC11C	1	0	2	0.500257	0.500513	0
HSPA1B	1	0	2	0.500257	0.500513	0
N4BP2L1	1	0	2	0.500257	0.500513	0
CD300LF	1	6	2	0.501193	0.502381	0
SEM1	1	0	2	0.500257	0.500513	0
PIM1	1	0	2	0.500257	0.500513	0
OCIAD2	1	0	2	0.500257	0.500513	0
SETD2	1	0	2	0.500257	0.500513	0
AURKB	1	1	2	0.501124	0.502242	0
EMC7	1	0	2	0.500257	0.500513	0
HAPLN3	1	4	2	0.500876	0.501748	0
ZNF703	1	6	2	0.501193	0.502381	0
AKT1	1	0	2	0.500257	0.500513	0
ATP2A3	1	4	2	0.500876	0.501748	0
BMF	1	0	2	0.500257	0.500513	0
MNDA	1	0	2	0.500257	0.500513	0
LGALS3BP	1	5	2	0.502857	0.505682	0
ZDHHC20	1	0	2	0.500257	0.500513	0
SMOX	1	2	2	0.503704	0.507353	0
MCM3	1	1	2	0.501124	0.502242	0
TFAM	1	0	2	0.500257	0.500513	0
THAP9-AS1	1	0	2	0.500257	0.500513	0
PRKY	1	0	2	0.500257	0.500513	0
MTCO2P12	1	0	2	0.500257	0.500513	0
PABPC4	1	0	2	0.500257	0.500513	0
FXYD6	1	2	2	0.503704	0.507353	0
GNG11	1	7	2	0.50137	0.502732	0
PLSCR1	1	0	2	0.500257	0.500513	0
TNNT1	1	2	2	0.503704	0.507353	0
RNF144B	1	3	2	0.50137	0.502732	0
FPR1	1	0	2	0.500257	0.500513	0
RUFY4	1	5	2	0.502857	0.505682	0
HLX	1	2	2	0.503704	0.507353	0
MARCO	1	2	2	0.503704	0.507353	0
TSC22D4	1	0	2	0.500257	0.500513	0
MYOM2	1	6	2	0.501193	0.502381	0
HSPA8	1	0	2	0.500257	0.500513	0
CD300C	1	2	2	0.503704	0.507353	0
GSR	1	0	2	0.500257	0.500513	0
LAG3	1	7	2	0.50137	0.502732	0
PILRA	1	0	2	0.500257	0.500513	0
SGK1	1	3	2	0.50137	0.502732	0
KANSL2	1	0	2	0.500257	0.500513	0
LEF1	1	0	2	0.500257	0.500513	0
NCF1C	1	2	2	0.503704	0.507353	0
PTGS1	1	7	2	0.50137	0.502732	0
ZNF706	1	0	2	0.500257	0.500513	0
PDE4B	1	0	2	0.500257	0.500513	0
RALB	1	0	2	0.500257	0.500513	0
ITGB5	1	7	2	0.50137	0.502732	0
PLCH2	1	0	2	0.500257	0.500513	0
LINC00861	1	4	2	0.500876	0.501748	0
PRDX3	1	0	2	0.500257	0.500513	0
FAM193B	1	0	2	0.500257	0.500513	0
TMEM229B	1	4	2	0.500876	0.501748	0
MAP3K7CL	1	7	2	0.50137	0.502732	0
VASH1	1	6	2	0.501193	0.502381	0
RETN	1	5	2	0.502857	0.505682	0
LGALS2	1	6	2	0.501193	0.502381	0
TICAM1	1	0	2	0.500257	0.500513	0
MTA1	1	0	2	0.500257	0.500513	0
MTCO1P12	1	0	2	0.500257	0.500513	0
IL2RB	1	0	2	0.500257	0.500513	0
SLC43A3	1	0	2	0.500257	0.500513	0
CD8B	1	0	2	0.500257	0.500513	0
HLA-DQA1	1	0	2	0.500257	0.500513	0
MS4A7	1	3	2	0.50137	0.502732	0
SERPINA1	1	3	2	0.50137	0.502732	0
IFIT2	1	5	2	0.502857	0.505682	0
RNASE1	1	1	2	0.501124	0.502242	0
C1QB	1	1	2	0.501124	0.502242	0
S100P	1	1	2	0.501124	0.502242	0
IL13RA1	1	3	2	0.50137	0.502732	0
RAB37	1	4	2	0.500876	0.501748	0
MANBA	1	0	2	0.500257	0.500513	0
KDM6B	1	0	2	0.500257	0.500513	0
ITGA2B	1	7	2	0.50137	0.502732	0
GCH1	1	0	2	0.500257	0.500513	0
ARHGEF2	1	0	2	0.500257	0.500513	0
CLEC12A	1	3	2	0.50137	0.502732	0
NCSTN	1	0	2	0.500257	0.500513	0
TSPOAP1	1	0	2	0.500257	0.500513	0
HERC5	1	0	2	0.500257	0.500513	0
IGF2R	1	0	2	0.500257	0.500513	0
MS4A1	1	0	2	0.500257	0.500513	0
ARHGEF10L	1	0	2	0.500257	0.500513	0
TYMS	1	1	2	0.501124	0.502242	0
ANPEP	1	3	2	0.50137	0.502732	0
DAP3	1	0	2	0.500257	0.500513	0
RIPK1	1	0	2	0.500257	0.500513	0
RGCC	1	0	2	0.500257	0.500513	0
H2AC6	1	7	2	0.50137	0.502732	0
NDEL1	1	0	2	0.500257	0.500513	0
PRAM1	1	6	2	0.501193	0.502381	0
CCR2	1	1	2	0.501124	0.502242	0
LDLRAD3	1	0	2	0.500257	0.500513	0
CX3CR1	1	7	2	0.50137	0.502732	0
LYST	1	0	2	0.500257	0.500513	0
TLR2	1	3	2	0.50137	0.502732	0
ADAP1	1	4	2	0.500876	0.501748	0
AQP9	1	3	2	0.50137	0.502732	0
PRDM1	1	0	2	0.500257	0.500513	0
CHPT1	1	0	2	0.500257	0.500513	0
H3C10	1	7	2	0.50137	0.502732	0
GCA	1	0	2	0.500257	0.500513	0
SLC38A5	1	5	2	0.502857	0.505682	0
MPIG6B	1	7	2	0.50137	0.502732	0
ZNF385A	1	6	2	0.501193	0.502381	0
SDC4	1	0	2	0.500257	0.500513	0
SULT1A1	1	0	2	0.500257	0.500513	0
PATL1	1	0	2	0.500257	0.500513	0
CHMP7	1	0	2	0.500257	0.500513	0
UBE2D1	1	0	2	0.500257	0.500513	0
SPATA13	1	0	2	0.500257	0.500513	0
PELATON	1	6	2	0.501193	0.502381	0
GBP5	1	0	2	0.500257	0.500513	0
DMXL2	1	3	2	0.50137	0.502732	0
LILRA6	1	2	2	0.503704	0.507353	0
FBXO46	1	0	2	0.500257	0.500513	0
TGFBR3	1	7	2	0.50137	0.502732	0
ATP5PD	1	0	2	0.500257	0.500513	0
RASSF3	1	0	2	0.500257	0.500513	0
TMEM176A	1	6	2	0.501193	0.502381	0
ASF1B	1	1	2	0.501124	0.502242	0
CCL2	1	0	2	0.500257	0.500513	0
IFNGR1	1	0	2	0.500257	0.500513	0
PADI2	1	3	2	0.50137	0.502732	0
IGHGP	1	1	2	0.501124	0.502242	0
SAMD1	1	0	2	0.500257	0.500513	0
SH2B3	1	0	2	0.500257	0.500513	0
PARP9	1	0	2	0.500257	0.500513	0
PDCD6IP	1	0	2	0.500257	0.500513	0
COP1	1	0	2	0.500257	0.500513	0
CRISPLD2	1	3	2	0.50137	0.502732	0
TRIM58	1	7	2	0.50137	0.502732	0
OSTF1	1	0	2	0.500257	0.500513	0
TCN2	1	2	2	0.503704	0.507353	0
FOLR3	1	6	2	0.501193	0.502381	0
AREG	1	0	2	0.500257	0.500513	0
EOMES	1	4	2	0.500876	0.501748	0
NBL1	1	4	2	0.500876	0.501748	0
LRRC41	1	0	2	0.500257	0.500513	0
LHFPL2	1	6	2	0.501193	0.502381	0
PPP1R16B	1	0	2	0.500257	0.500513	0
NR4A1	1	0	2	0.500257	0.500513	0
ZNF683	1	6	2	0.501193	0.502381	0
HERC6	1	5	2	0.502857	0.505682	0
KLRB1	1	0	2	0.500257	0.500513	0
PNRC2	1	0	2	0.500257	0.500513	0
TMEM230	1	0	2	0.500257	0.500513	0
RFX2	1	6	2	0.501193	0.502381	0
USP30-AS1	1	4	2	0.500876	0.501748	0
MYL9	1	7	2	0.50137	0.502732	0
SDHB	1	0	2	0.500257	0.500513	0
TREML1	1	7	2	0.50137	0.502732	0
DAXX	1	0	2	0.500257	0.500513	0
OSR2	1	0	2	0.500257	0.500513	0
PARP10	1	4	2	0.500876	0.501748	0
PCLAF	1	1	2	0.501124	0.502242	0
PADI4	1	6	2	0.501193	0.502381	0
PNMA3	1	4	2	0.500876	0.501748	0
ICAM1	1	6	2	0.501193	0.502381	0
PI4KA	1	0	2	0.500257	0.500513	0
MT1E	1	0	2	0.500257	0.500513	0
DUSP8	1	4	2	0.500876	0.501748	0
TNFSF12	1	0	2	0.500257	0.500513	0
WRAP73	1	0	2	0.500257	0.500513	0
SMAD7	1	6	2	0.501193	0.502381	0
FGD4	1	3	2	0.50137	0.502732	0
FAF2	1	0	2	0.500257	0.500513	0
U3	1	4	2	0.500876	0.501748	0
OSM	1	0	2	0.500257	0.500513	0
KIFC3	1	0	2	0.500257	0.500513	0
TOP2A	1	1	2	0.501124	0.502242	0
PAX5	1	0	2	0.500257	0.500513	0
EGR2	1	3	2	0.50137	0.502732	0
PRKAR2B	1	7	2	0.50137	0.502732	0
PLXDC2	1	6	2	0.501193	0.502381	0
CD1D	1	3	2	0.50137	0.502732	0
RNASE3	1	5	2	0.502857	0.505682	0
PRR7	1	4	2	0.500876	0.501748	0
MED30	1	0	2	0.500257	0.500513	0
KLRF1	1	4	2	0.500876	0.501748	0
CASP8	1	0	2	0.500257	0.500513	0
EIF2D	1	0	2	0.500257	0.500513	0
ESRRA	1	0	2	0.500257	0.500513	0
UNK	1	0	2	0.500257	0.500513	0
IFI44	1	0	2	0.500257	0.500513	0
HCAR3	1	6	2	0.501193	0.502381	0
RGL1	1	1	2	0.501124	0.502242	0
SAMD9L	1	5	2	0.502857	0.505682	0
NSUN2	1	0	2	0.500257	0.500513	0
ESAM	1	7	2	0.50137	0.502732	0
MT-TI	1	7	2	0.50137	0.502732	0
RASA2	1	0	2	0.500257	0.500513	0
IFI27L1	1	1	2	0.501124	0.502242	0
MMD	1	0	2	0.500257	0.500513	0
CD7	1	4	2	0.500876	0.501748	0
FES	1	2	2	0.503704	0.507353	0
ALDH2	1	3	2	0.50137	0.502732	0
GLT1D1	1	6	2	0.501193	0.502381	0
EED	1	0	2	0.500257	0.500513	0
FAM207A	1	4	2	0.500876	0.501748	0
BCAS4	1	4	2	0.500876	0.501748	0
CEP20	1	0	2	0.500257	0.500513	0
TPX2	1	1	2	0.501124	0.502242	0
FAM118A	1	4	2	0.500876	0.501748	0
LILRA1	1	6	2	0.501193	0.502381	0
FEN1	1	0	2	0.500257	0.500513	0
DHX58	1	0	2	0.500257	0.500513	0
SUCLG2	1	0	2	0.500257	0.500513	0
MS4A4A	1	1	2	0.501124	0.502242	0
DTD1	1	0	2	0.500257	0.500513	0
DTX3	1	0	2	0.500257	0.500513	0
SRC	1	6	2	0.501193	0.502381	0
IMPA2	1	0	2	0.500257	0.500513	0
KIF13A	1	3	2	0.50137	0.502732	0
SLC25A42	1	0	2	0.500257	0.500513	0
MTRNR2L12	1	4	2	0.500876	0.501748	0
SRPRA	1	0	2	0.500257	0.500513	0
DDOST	1	0	2	0.500257	0.500513	0
VSTM1	1	2	2	0.503704	0.507353	0
CLEC4E	1	3	2	0.50137	0.502732	0
TMEM158	1	7	2	0.50137	0.502732	0
METTL17	1	0	2	0.500257	0.500513	0
SIGLEC10	1	3	2	0.50137	0.502732	0
PLK1	1	1	2	0.501124	0.502242	0
SLC35A2	1	0	2	0.500257	0.500513	0
RBP7	1	6	2	0.501193	0.502381	0
H2BC11	1	7	2	0.50137	0.502732	0
HVCN1	1	0	2	0.500257	0.500513	0
GLRX	1	0	2	0.500257	0.500513	0
FFAR2	1	2	2	0.503704	0.507353	0
SNPH	1	4	2	0.500876	0.501748	0
HK2	1	0	2	0.500257	0.500513	0
HNMT	1	0	2	0.500257	0.500513	0
NSMAF	1	0	2	0.500257	0.500513	0
SERPINB2	1	0	2	0.500257	0.500513	0
CAVIN2	1	7	2	0.50137	0.502732	0
HCAR2	1	3	2	0.50137	0.502732	0
NRROS	1	0	2	0.500257	0.500513	0
KDM3A	1	0	2	0.500257	0.500513	0
CLEC1B	1	7	2	0.50137	0.502732	0
MYLK	1	7	2	0.50137	0.502732	0
ST6GALNAC4	1	4	2	0.500876	0.501748	0
IGHD	1	7	2	0.50137	0.502732	0
CD70	1	1	2	0.501124	0.502242	0
DNAJB9	1	0	2	0.500257	0.500513	0
CHURC1	1	0	2	0.500257	0.500513	0
ERLIN1	1	0	2	0.500257	0.500513	0
ELK1	1	0	2	0.500257	0.500513	0
XAF1	1	5	2	0.502857	0.505682	0
CDKN1C	1	6	2	0.501193	0.502381	0
ADGRE2	1	6	2	0.501193	0.502381	0
SLCO4A1	1	1	2	0.501124	0.502242	0
BIRC5	1	1	2	0.501124	0.502242	0
MTMR11	1	3	2	0.50137	0.502732	0
TM7SF3	1	0	2	0.500257	0.500513	0
RPS6KA4	1	4	2	0.500876	0.501748	0
SPATS2L	1	5	2	0.502857	0.505682	0
C11orf96	1	0	2	0.500257	0.500513	0
MT-TV	1	4	2	0.500876	0.501748	0
FCGR1A	1	2	2	0.503704	0.507353	0
MKI67	1	1	2	0.501124	0.502242	0
POC1A	1	1	2	0.501124	0.502242	0
PLPPR2	1	6	2	0.501193	0.502381	0
JAZF1	1	0	2	0.500257	0.500513	0
SEPHS2	1	0	2	0.500257	0.500513	0
FCRL5	1	1	2	0.501124	0.502242	0
CXorf38	1	0	2	0.500257	0.500513	0
KTI12	1	0	2	0.500257	0.500513	0
HBA1	1	7	2	0.50137	0.502732	0
TXN	1	0	2	0.500257	0.500513	0
LINC02035	1	6	2	0.501193	0.502381	0
SIGLEC14	1	0	2	0.500257	0.500513	0
CDC42EP4	1	0	2	0.500257	0.500513	0
MERTK	1	0	2	0.500257	0.500513	0
CPVL	1	0	2	0.500257	0.500513	0
UBE2C	1	1	2	0.501124	0.502242	0
GNPTG	1	0	2	0.500257	0.500513	0
OAT	1	0	2	0.500257	0.500513	0
MCM2	1	0	2	0.500257	0.500513	0
ASRGL1	1	3	2	0.50137	0.502732	0
LONRF1	1	0	2	0.500257	0.500513	0
LTBR	1	2	2	0.503704	0.507353	0
LYPD3	1	4	2	0.500876	0.501748	0
RUVBL1	1	0	2	0.500257	0.500513	0
CYP1B1	1	3	2	0.50137	0.502732	0
HLA-DQA2	1	0	2	0.500257	0.500513	0
CEP95	1	0	2	0.500257	0.500513	0
EPHB2	1	5	2	0.502857	0.505682	0
SIGLEC7	1	6	2	0.501193	0.502381	0
CDT1	1	1	2	0.501124	0.502242	0
GDPD5	1	4	2	0.500876	0.501748	0
CXCL10	1	5	2	0.502857	0.505682	0
IFIH1	1	0	2	0.500257	0.500513	0
VEGFA	1	0	2	0.500257	0.500513	0
MTLN	1	0	2	0.500257	0.500513	0
FBP1	1	3	2	0.50137	0.502732	0
C3AR1	1	0	2	0.500257	0.500513	0
RYK	1	0	2	0.500257	0.500513	0
PRUNE1	1	0	2	0.500257	0.500513	0
RMC1	1	0	2	0.500257	0.500513	0
MTPAP	1	0	2	0.500257	0.500513	0
METTL1	1	4	2	0.500876	0.501748	0
TMEM14A	1	0	2	0.500257	0.500513	0
CXCL3	1	0	2	0.500257	0.500513	0
INTS6L	1	0	2	0.500257	0.500513	0
ADGRE1	1	6	2	0.501193	0.502381	0
TTC14	1	0	2	0.500257	0.500513	0
MRPL16	1	0	2	0.500257	0.500513	0
C2	1	2	2	0.503704	0.507353	0
LRG1	1	2	2	0.503704	0.507353	0
DHRS7	1	0	2	0.500257	0.500513	0
TRIM14	1	0	2	0.500257	0.500513	0
TSPAN9	1	7	2	0.50137	0.502732	0
PTCRA	1	7	2	0.50137	0.502732	0
SULF2	1	6	2	0.501193	0.502381	0
MIR22HG	1	0	2	0.500257	0.500513	0
SH3BGRL2	1	7	2	0.50137	0.502732	0
TMEM71	1	0	2	0.500257	0.500513	0
EVI2A	1	0	2	0.500257	0.500513	0
CTDSPL	1	7	2	0.50137	0.502732	0
MUS81	1	0	2	0.500257	0.500513	0
NDUFB3	1	0	2	0.500257	0.500513	0
CHI3L2	1	7	2	0.50137	0.502732	0
ITGA6	1	0	2	0.500257	0.500513	0
C15orf48	1	0	2	0.500257	0.500513	0
MRPL49	1	0	2	0.500257	0.500513	0
TOB2	1	0	2	0.500257	0.500513	0
PATL2	1	0	2	0.500257	0.500513	0
MARVELD1	1	6	2	0.501193	0.502381	0
BMP6	1	7	2	0.50137	0.502732	0
RB1	1	0	2	0.500257	0.500513	0
THBD	1	3	2	0.50137	0.502732	0
NBPF11	1	0	2	0.500257	0.500513	0
PLAAT2	1	5	2	0.502857	0.505682	0
SNORD13E	1	4	2	0.500876	0.501748	0
MRPL33	1	0	2	0.500257	0.500513	0
C5orf15	1	0	2	0.500257	0.500513	0
CD9	1	0	2	0.500257	0.500513	0
IFIT5	1	0	2	0.500257	0.500513	0
NRIP3	1	6	2	0.501193	0.502381	0
HIC1	1	3	2	0.50137	0.502732	0
RGS18	1	0	2	0.500257	0.500513	0
SEMA6B	1	6	2	0.501193	0.502381	0
HK3	1	0	2	0.500257	0.500513	0
CCNH	1	0	2	0.500257	0.500513	0
RPS29P16	1	0	2	0.500257	0.500513	0
NPL	1	0	2	0.500257	0.500513	0
RHOC	1	4	2	0.500876	0.501748	0
ABCA1	1	0	2	0.500257	0.500513	0
STAG3	1	5	2	0.502857	0.505682	0
DERL3	1	1	2	0.501124	0.502242	0
TNFRSF17	1	1	2	0.501124	0.502242	0
IER5L	1	0	2	0.500257	0.500513	0
HES1	1	0	2	0.500257	0.500513	0
FCRL6	1	4	2	0.500876	0.501748	0
BCOR	1	0	2	0.500257	0.500513	0
CMKLR1	1	7	2	0.50137	0.502732	0
TAL1	1	7	2	0.50137	0.502732	0
EDEM3	1	0	2	0.500257	0.500513	0
IGLL5	1	1	2	0.501124	0.502242	0
LRRK2	1	3	2	0.50137	0.502732	0
DPEP2	1	6	2	0.501193	0.502381	0
TP53INP2	1	0	2	0.500257	0.500513	0
KRT72	1	4	2	0.500876	0.501748	0
ZNF746	1	0	2	0.500257	0.500513	0
FLVCR2	1	0	2	0.500257	0.500513	0
VPREB3	1	4	2	0.500876	0.501748	0
PISD	1	0	2	0.500257	0.500513	0
CHPF	1	5	2	0.502857	0.505682	0
SNRPA1	1	0	2	0.500257	0.500513	0
FKBP11	1	1	2	0.501124	0.502242	0
RPL23AP42	1	0	2	0.500257	0.500513	0
SDHC	1	0	2	0.500257	0.500513	0
FAM214B	1	0	2	0.500257	0.500513	0
F5	1	0	2	0.500257	0.500513	0
PRSS23	1	0	2	0.500257	0.500513	0
CRIP2	1	4	2	0.500876	0.501748	0
SF3B4	1	0	2	0.500257	0.500513	0
IPMK	1	0	2	0.500257	0.500513	0
IFNG	1	0	2	0.500257	0.500513	0
CD79B	1	4	2	0.500876	0.501748	0
OLR1	1	3	2	0.50137	0.502732	0
NPTXR	1	4	2	0.500876	0.501748	0
MRPL32	1	0	2	0.500257	0.500513	0
SERINC2	1	2	2	0.503704	0.507353	0
DDN-AS1	1	6	2	0.501193	0.502381	0
IRF4	1	0	2	0.500257	0.500513	0
FHIT	1	4	2	0.500876	0.501748	0
MGST1	1	0	2	0.500257	0.500513	0
HBD	1	0	2	0.500257	0.500513	0
PTS	1	0	2	0.500257	0.500513	0
LUCAT1	1	6	2	0.501193	0.502381	0
CXCL2	1	0	2	0.500257	0.500513	0
SOCS1	1	0	2	0.500257	0.500513	0
GINS2	1	1	2	0.501124	0.502242	0
MTRNR2L1	1	0	2	0.500257	0.500513	0
QPCT	1	0	2	0.500257	0.500513	0
MRPS22	1	0	2	0.500257	0.500513	0
SLC16A6	1	0	2	0.500257	0.500513	0
DNASE1	1	6	2	0.501193	0.502381	0
SERPINH1	1	0	2	0.500257	0.500513	0
HIKESHI	1	0	2	0.500257	0.500513	0
PLK2	1	0	2	0.500257	0.500513	0
CCDC28B	1	4	2	0.500876	0.501748	0
GGH	1	0	2	0.500257	0.500513	0
PAN2	1	0	2	0.500257	0.500513	0
ENOX2	1	0	2	0.500257	0.500513	0
PANX2	1	2	2	0.503704	0.507353	0
C2orf88	1	7	2	0.50137	0.502732	0
MAD2L1BP	1	0	2	0.500257	0.500513	0
TK1	1	1	2	0.501124	0.502242	0
LATS1	1	0	2	0.500257	0.500513	0
NAAA	1	0	2	0.500257	0.500513	0
ENC1	1	0	2	0.500257	0.500513	0
TSPAN4	1	4	2	0.500876	0.501748	0
B3GAT1	1	7	2	0.50137	0.502732	0
RNF130	1	0	2	0.500257	0.500513	0
GPD1L	1	0	2	0.500257	0.500513	0
SNX9	1	0	2	0.500257	0.500513	0
ZBED5-AS1	1	0	2	0.500257	0.500513	0
CD1C	1	6	2	0.501193	0.502381	0
DHCR24	1	1	2	0.501124	0.502242	0
GCNT4	1	0	2	0.500257	0.500513	0
E2F1	1	1	2	0.501124	0.502242	0
BAG3	1	0	2	0.500257	0.500513	0
GTF2H5	1	0	2	0.500257	0.500513	0
TMEM40	1	7	2	0.50137	0.502732	0
SMIM5	1	7	2	0.50137	0.502732	0
SHTN1	1	3	2	0.50137	0.502732	0
HLA-J	1	0	2	0.500257	0.500513	0
IFITM10	1	6	2	0.501193	0.502381	0
GNAZ	1	7	2	0.50137	0.502732	0
LYSMD2	1	0	2	0.500257	0.500513	0
MRPL13	1	0	2	0.500257	0.500513	0
NEXN	1	5	2	0.502857	0.505682	0
WDR11	1	0	2	0.500257	0.500513	0
CD302	1	3	2	0.50137	0.502732	0
F13A1	1	0	2	0.500257	0.500513	0
TRDC	1	4	2	0.500876	0.501748	0
RNF146	1	0	2	0.500257	0.500513	0
SNAI1	1	0	2	0.500257	0.500513	0
SKA1	1	1	2	0.501124	0.502242	0
NRARP	1	6	2	0.501193	0.502381	0
SLC35B2	1	0	2	0.500257	0.500513	0
ASGR1	1	0	2	0.500257	0.500513	0
CYB5A	1	0	2	0.500257	0.500513	0
SH2D1B	1	7	2	0.50137	0.502732	0
COPS7A	1	0	2	0.500257	0.500513	0
MUC1	1	4	2	0.500876	0.501748	0
PDZK1IP1	1	7	2	0.50137	0.502732	0
LIX1L	1	0	2	0.500257	0.500513	0
P2RY13	1	3	2	0.50137	0.502732	0
IGFBP2	1	1	2	0.501124	0.502242	0
NMUR1	1	4	2	0.500876	0.501748	0
NSUN5P2	1	4	2	0.500876	0.501748	0
DUSP11	1	0	2	0.500257	0.500513	0
CTLA4	1	0	2	0.500257	0.500513	0
UTP6	1	0	2	0.500257	0.500513	0
HSPA6	1	0	2	0.500257	0.500513	0
GFI1B	1	7	2	0.50137	0.502732	0
CXCR5	1	0	2	0.500257	0.500513	0
VIPR1	1	4	2	0.500876	0.501748	0
ALKBH6	1	0	2	0.500257	0.500513	0
SNORD104	1	4	2	0.500876	0.501748	0
RNU4-2	1	4	2	0.500876	0.501748	0
CAVIN3	1	2	2	0.503704	0.507353	0
SLC39A8	1	0	2	0.500257	0.500513	0
RGL4	1	0	2	0.500257	0.500513	0
BRCA1	1	1	2	0.501124	0.502242	0
ELP5	1	0	2	0.500257	0.500513	0
ABCB9	1	1	2	0.501124	0.502242	0
NXF3	1	7	2	0.50137	0.502732	0
LINC00877	1	6	2	0.501193	0.502381	0
STAG3L5P-PVRIG2P-PILRB	1	4	2	0.500876	0.501748	0
INAFM2	1	0	2	0.500257	0.500513	0
RPL34P27	1	0	2	0.500257	0.500513	0
KAT2B	1	0	2	0.500257	0.500513	0
ZBTB32	1	5	2	0.502857	0.505682	0
GP1BA	1	0	2	0.500257	0.500513	0
PDLIM7	1	2	2	0.503704	0.507353	0
DNAAF1	1	0	2	0.500257	0.500513	0
TCIRG1	1	0	2	0.500257	0.500513	0
S1PR5	1	0	2	0.500257	0.500513	0
APEX1	1	0	2	0.500257	0.500513	0
HDHD5	1	0	2	0.500257	0.500513	0
CEP170	1	0	2	0.500257	0.500513	0
LILRA4	1	4	2	0.500876	0.501748	0
TLR8	1	3	2	0.50137	0.502732	0
IGFBP7	1	0	2	0.500257	0.500513	0
UCKL1	1	0	2	0.500257	0.500513	0
TPPP3	1	6	2	0.501193	0.502381	0
LAIR2	1	0	2	0.500257	0.500513	0
SELENOI	1	0	2	0.500257	0.500513	0
IGLC7	1	1	2	0.501124	0.502242	0
STX1A	1	3	2	0.50137	0.502732	0
GPT2	1	1	2	0.501124	0.502242	0
IL15	1	0	2	0.500257	0.500513	0
SNORD3A	1	4	2	0.500876	0.501748	0
CR1	1	3	2	0.50137	0.502732	0
TCL1A	1	4	2	0.500876	0.501748	0
CASP9	1	0	2	0.500257	0.500513	0
PPP2R2B	1	0	2	0.500257	0.500513	0
PRR5L	1	4	2	0.500876	0.501748	0
ZWINT	1	1	2	0.501124	0.502242	0
PF4V1	1	7	2	0.50137	0.502732	0
STAP1	1	5	2	0.502857	0.505682	0
MITD1	1	0	2	0.500257	0.500513	0
TNFRSF13B	1	5	2	0.502857	0.505682	0
BCAT1	1	3	2	0.50137	0.502732	0
ACVRL1	1	5	2	0.502857	0.505682	0
NT5M	1	7	2	0.50137	0.502732	0
AURKA	1	1	2	0.501124	0.502242	0
NAA80	1	4	2	0.500876	0.501748	0
H4C8	1	7	2	0.50137	0.502732	0
PBX4	1	0	2	0.500257	0.500513	0
HSD17B1-AS1	1	4	2	0.500876	0.501748	0
AQP3	1	0	2	0.500257	0.500513	0
ADTRP	1	4	2	0.500876	0.501748	0
ZNF503	1	6	2	0.501193	0.502381	0
FAM20A	1	1	2	0.501124	0.502242	0
SIAH1	1	0	2	0.500257	0.500513	0
PID1	1	3	2	0.50137	0.502732	0
CLEC4D	1	3	2	0.50137	0.502732	0
SRP19	1	0	2	0.500257	0.500513	0
ZNF75D	1	0	2	0.500257	0.500513	0
CARD9	1	6	2	0.501193	0.502381	0
ATP13A3	1	0	2	0.500257	0.500513	0
C1orf174	1	0	2	0.500257	0.500513	0
ABCC3	1	7	2	0.50137	0.502732	0
SSTR3	1	5	2	0.502857	0.505682	0
MTND2P28	1	0	2	0.500257	0.500513	0
MATK	1	4	2	0.500876	0.501748	0
ANKRD22	1	2	2	0.503704	0.507353	0
NCAM1	1	7	2	0.50137	0.502732	0
KLRC1	1	0	2	0.500257	0.500513	0
PDE6D	1	0	2	0.500257	0.500513	0
SLC25A33	1	0	2	0.500257	0.500513	0
PKMYT1	1	1	2	0.501124	0.502242	0
TP53I3	1	2	2	0.503704	0.507353	0
EREG	1	3	2	0.50137	0.502732	0
NCAPG	1	1	2	0.501124	0.502242	0
MYCL	1	3	2	0.50137	0.502732	0
PLEKHG5	1	4	2	0.500876	0.501748	0
RPL34P18	1	0	2	0.500257	0.500513	0
NCR1	1	4	2	0.500876	0.501748	0
IGHG2	1	0	2	0.500257	0.500513	0
EIF4B	1	0	2	0.500257	0.500513	0
PHACTR1	1	6	2	0.501193	0.502381	0
UIMC1	1	0	2	0.500257	0.500513	0
PDGFRB	1	0	2	0.500257	0.500513	0
KCNMA1	1	0	2	0.500257	0.500513	0
MAP2K1	1	0	2	0.500257	0.500513	0
SHROOM1	1	6	2	0.501193	0.502381	0
CDC20	1	1	2	0.501124	0.502242	0
WDR75	1	0	2	0.500257	0.500513	0
CEACAM4	1	2	2	0.503704	0.507353	0
PHGDH	1	1	2	0.501124	0.502242	0
NRG1	1	3	2	0.50137	0.502732	0
CCNB2	1	1	2	0.501124	0.502242	0
MT1G	1	1	2	0.501124	0.502242	0
EMC2	1	0	2	0.500257	0.500513	0
CD101	1	0	2	0.500257	0.500513	0
NCAPG2	1	0	2	0.500257	0.500513	0
PNMA1	1	0	2	0.500257	0.500513	0
CDK1	1	1	2	0.501124	0.502242	0
SHCBP1	1	0	2	0.500257	0.500513	0
PDE2A	1	7	2	0.50137	0.502732	0
ABCC10	1	0	2	0.500257	0.500513	0
PYCR1	1	1	2	0.501124	0.502242	0
KCNE1	1	2	2	0.503704	0.507353	0
EHD3	1	7	2	0.50137	0.502732	0
CDCA3	1	1	2	0.501124	0.502242	0
EIF4EBP1	1	2	2	0.503704	0.507353	0
OLIG1	1	3	2	0.50137	0.502732	0
ABLIM3	1	7	2	0.50137	0.502732	0
TMCC2	1	0	2	0.500257	0.500513	0
SMCO4	1	3	2	0.50137	0.502732	0
ATG4D	1	4	2	0.500876	0.501748	0
SORT1	1	3	2	0.50137	0.502732	0
TSHZ2	1	4	2	0.500876	0.501748	0
CXCL1	1	0	2	0.500257	0.500513	0
TNFRSF18	1	4	2	0.500876	0.501748	0
ABTB2	1	1	2	0.501124	0.502242	0
FPR2	1	0	2	0.500257	0.500513	0
SLC25A22	1	0	2	0.500257	0.500513	0
CISH	1	0	2	0.500257	0.500513	0
FAM216A	1	0	2	0.500257	0.500513	0
ITM2C	1	0	2	0.500257	0.500513	0
CNBD2	1	0	2	0.500257	0.500513	0
PRC1	1	0	2	0.500257	0.500513	0
GARRE1	1	0	2	0.500257	0.500513	0
SIGLEC16	1	2	2	0.503704	0.507353	0
PKD2L1	1	5	2	0.502857	0.505682	0
KDM1B	1	3	2	0.50137	0.502732	0
CLDN5	1	7	2	0.50137	0.502732	0
RTN1	1	3	2	0.50137	0.502732	0
ZNF708	1	0	2	0.500257	0.500513	0
FCGBP	1	4	2	0.500876	0.501748	0
ITGA7	1	2	2	0.503704	0.507353	0
MMP14	1	2	2	0.503704	0.507353	0
C12orf65	1	0	2	0.500257	0.500513	0
TCEAL9	1	0	2	0.500257	0.500513	0
GPR174	1	0	2	0.500257	0.500513	0
C1QC	1	1	2	0.501124	0.502242	0
CCDC149	1	6	2	0.501193	0.502381	0
INTS5	1	0	2	0.500257	0.500513	0
MAP1A	1	7	2	0.50137	0.502732	0
LARGE2	1	4	2	0.500876	0.501748	0
LINC00989	1	7	2	0.50137	0.502732	0
FBXL12	1	0	2	0.500257	0.500513	0
ETV7	1	5	2	0.502857	0.505682	0
LGMN	1	0	2	0.500257	0.500513	0
ALAS1	1	0	2	0.500257	0.500513	0
MIR222HG	1	3	2	0.50137	0.502732	0
NIF3L1	1	0	2	0.500257	0.500513	0
GP9	1	7	2	0.50137	0.502732	0
LAMP3	1	5	2	0.502857	0.505682	0
MAPK7	1	0	2	0.500257	0.500513	0
FRMD3	1	7	2	0.50137	0.502732	0
ABCD4	1	0	2	0.500257	0.500513	0
FAXDC2	1	7	2	0.50137	0.502732	0
NRIR	1	5	2	0.502857	0.505682	0
CDKN3	1	1	2	0.501124	0.502242	0
HJURP	1	1	2	0.501124	0.502242	0
FBXO2	1	4	2	0.500876	0.501748	0
RTP5	1	4	2	0.500876	0.501748	0
SLC2A5	1	1	2	0.501124	0.502242	0
LIPN	1	3	2	0.50137	0.502732	0
NEU4	1	6	2	0.501193	0.502381	0
FANCL	1	0	2	0.500257	0.500513	0
PELI3	1	6	2	0.501193	0.502381	0
C5AR2	1	6	2	0.501193	0.502381	0
SLC1A7	1	4	2	0.500876	0.501748	0
TNFRSF4	1	4	2	0.500876	0.501748	0
IL4I1	1	5	2	0.502857	0.505682	0
BACE1	1	3	2	0.50137	0.502732	0
GPR35	1	4	2	0.500876	0.501748	0
P2RY2	1	6	2	0.501193	0.502381	0
LINC00487	1	5	2	0.502857	0.505682	0
LINC01943	1	2	2	0.503704	0.507353	0
GTPBP2	1	0	2	0.500257	0.500513	0
SPOCD1	1	7	2	0.50137	0.502732	0
HAAO	1	6	2	0.501193	0.502381	0
LINC00937	1	3	2	0.50137	0.502732	0
FBXW9	1	4	2	0.500876	0.501748	0
B4GALT4	1	0	2	0.500257	0.500513	0
KRT1	1	4	2	0.500876	0.501748	0
MTFMT	1	0	2	0.500257	0.500513	0
P2RY1	1	0	2	0.500257	0.500513	0
HGD	1	7	2	0.50137	0.502732	0
C4orf33	1	0	2	0.500257	0.500513	0
TIMD4	1	1	2	0.501124	0.502242	0
KIR3DL2	1	0	2	0.500257	0.500513	0
TTC16	1	4	2	0.500876	0.501748	0
LINC01480	1	1	2	0.501124	0.502242	0
ADD2	1	4	2	0.500876	0.501748	0
IZUMO4	1	4	2	0.500876	0.501748	0
LINC01550	1	4	2	0.500876	0.501748	0
P2RY6	1	5	2	0.502857	0.505682	0
LGALSL	1	7	2	0.50137	0.502732	0
METTL7B	1	1	2	0.501124	0.502242	0
TRPV4	1	2	2	0.503704	0.507353	0
MYC	1	0	2	0.500257	0.500513	0
MCTP1	1	3	2	0.50137	0.502732	0
VTRNA1-3	1	4	2	0.500876	0.501748	0
MYZAP	1	7	2	0.50137	0.502732	0
PARP11-AS1	1	4	2	0.500876	0.501748	0
RASD1	1	0	2	0.500257	0.500513	0
MYO7A	1	5	2	0.502857	0.505682	0
RMI2	1	0	2	0.500257	0.500513	0
MT-TL2	1	4	2	0.500876	0.501748	0
CADM1	1	1	2	0.501124	0.502242	0
PEAR1	1	7	2	0.50137	0.502732	0
CALHM6	1	0	2	0.500257	0.500513	0
DEFB1	1	5	2	0.502857	0.505682	0
IL18RAP	1	0	2	0.500257	0.500513	0
ANG	1	2	2	0.503704	0.507353	0
ZBTB42	1	4	2	0.500876	0.501748	0
NEURL1	1	6	2	0.501193	0.502381	0
CD180	1	0	2	0.500257	0.500513	0
DCK	1	0	2	0.500257	0.500513	0
BCL2L14	1	5	2	0.502857	0.505682	0
CIB2	1	4	2	0.500876	0.501748	0
PTGDS	1	4	2	0.500876	0.501748	0
PDE5A	1	7	2	0.50137	0.502732	0
CNPY4	1	0	2	0.500257	0.500513	0
TRPM2	1	2	2	0.503704	0.507353	0
PDGFA	1	0	2	0.500257	0.500513	0
UCP3	1	4	2	0.500876	0.501748	0
SOCAR	1	2	2	0.503704	0.507353	0
ACP3	1	3	2	0.50137	0.502732	0
CYP27A1	1	3	2	0.50137	0.502732	0
TDRD7	1	0	2	0.500257	0.500513	0
ZBP1	1	0	2	0.500257	0.500513	0
SLC24A4	1	3	2	0.50137	0.502732	0
TMEM121	1	4	2	0.500876	0.501748	0
SLED1	1	0	2	0.500257	0.500513	0
BATF3	1	4	2	0.500876	0.501748	0
TMEM63B	1	0	2	0.500257	0.500513	0
MLF1	1	3	2	0.50137	0.502732	0
KANSL1-AS1	1	3	2	0.50137	0.502732	0
ACVR1	1	0	2	0.500257	0.500513	0
B3GNT5	1	0	2	0.500257	0.500513	0
PAX8-AS1	1	0	2	0.500257	0.500513	0
C16orf91	1	0	2	0.500257	0.500513	0
EGR3	1	6	2	0.501193	0.502381	0
CDC6	1	1	2	0.501124	0.502242	0
TCF20	1	0	2	0.500257	0.500513	0
ZNF697	1	3	2	0.50137	0.502732	0
MYBL1	1	7	2	0.50137	0.502732	0
ARPIN	1	6	2	0.501193	0.502381	0
RINT1	1	0	2	0.500257	0.500513	0
TMEM52B	1	6	2	0.501193	0.502381	0
CDCA8	1	1	2	0.501124	0.502242	0
CDCA7	1	0	2	0.500257	0.500513	0
KIR2DS4	1	0	2	0.500257	0.500513	0
NET1	1	0	2	0.500257	0.500513	0
LINC01503	1	6	2	0.501193	0.502381	0
MAPK11	1	4	2	0.500876	0.501748	0
ALDH18A1	1	0	2	0.500257	0.500513	0
KISS1R	1	4	2	0.500876	0.501748	0
SASH1	1	6	2	0.501193	0.502381	0
GPR153	1	6	2	0.501193	0.502381	0
CENPU	1	0	2	0.500257	0.500513	0
ST3GAL6	1	3	2	0.50137	0.502732	0
SFN	1	4	2	0.500876	0.501748	0
MIR17HG	1	0	2	0.500257	0.500513	0
RTP4	1	5	2	0.502857	0.505682	0
MMP9	1	3	2	0.50137	0.502732	0
ADAMTS2	1	1	2	0.501124	0.502242	0
ARAP3	1	6	2	0.501193	0.502381	0
FCGR1B	1	2	2	0.503704	0.507353	0
FAM157C	1	6	2	0.501193	0.502381	0
RHOBTB1	1	7	2	0.50137	0.502732	0
IL15RA	1	0	2	0.500257	0.500513	0
PBX1	1	0	2	0.500257	0.500513	0
SYN1	1	3	2	0.50137	0.502732	0
CSF2RA	1	3	2	0.50137	0.502732	0
ETV3	1	0	2	0.500257	0.500513	0
NUF2	1	0	2	0.500257	0.500513	0
CCNA2	1	1	2	0.501124	0.502242	0
VENTX	1	6	2	0.501193	0.502381	0
ZNF143	1	0	2	0.500257	0.500513	0
SEC14L2	1	4	2	0.500876	0.501748	0
RAD51	1	1	2	0.501124	0.502242	0
CETP	1	7	2	0.50137	0.502732	0
CCR10	1	5	2	0.502857	0.505682	0
SELP	1	7	2	0.50137	0.502732	0
DMTN	1	7	2	0.50137	0.502732	0
STIL	1	0	2	0.500257	0.500513	0
KIR2DL4	1	0	2	0.500257	0.500513	0
DNAJC13	1	0	2	0.500257	0.500513	0
TGIF2	1	0	2	0.500257	0.500513	0
RAB24	1	6	2	0.501193	0.502381	0
MIR124-1HG	1	0	2	0.500257	0.500513	0
ADGRG3	1	0	2	0.500257	0.500513	0
SHMT1	1	0	2	0.500257	0.500513	0
FCGR3B	1	0	2	0.500257	0.500513	0
GPR42	1	3	2	0.50137	0.502732	0
CYB5R2	1	2	2	0.503704	0.507353	0
DOCK9	1	0	2	0.500257	0.500513	0
CSF2RB	1	0	2	0.500257	0.500513	0
POM121	1	0	2	0.500257	0.500513	0
CXCR2P1	1	0	2	0.500257	0.500513	0
TPST1	1	0	2	0.500257	0.500513	0
DSC2	1	3	2	0.50137	0.502732	0
CCZ1B	1	0	2	0.500257	0.500513	0
MPZL2	1	0	2	0.500257	0.500513	0
RRAGC	1	0	2	0.500257	0.500513	0
CHEK2	1	0	2	0.500257	0.500513	0
PDCD2L	1	0	2	0.500257	0.500513	0
TOMM40	1	0	2	0.500257	0.500513	0
BICRA	1	0	2	0.500257	0.500513	0
MSR1	1	2	2	0.503704	0.507353	0
TXNRD1	1	0	2	0.500257	0.500513	0
MEIS1	1	7	2	0.50137	0.502732	0
NBPF20	1	0	2	0.500257	0.500513	0
GPER1	1	2	2	0.503704	0.507353	0
CCDC184	1	4	2	0.500876	0.501748	0
SERPINE1	1	0	2	0.500257	0.500513	0
TRIM21	1	0	2	0.500257	0.500513	0
CACNA2D2	1	0	2	0.500257	0.500513	0
S100B	1	4	2	0.500876	0.501748	0
SHLD3	1	0	2	0.500257	0.500513	0
COA6	1	0	2	0.500257	0.500513	0
MDGA1	1	7	2	0.50137	0.502732	0
GPBAR1	1	2	2	0.503704	0.507353	0
APPL2	1	0	2	0.500257	0.500513	0
SAP30	1	0	2	0.500257	0.500513	0
TLR7	1	0	2	0.500257	0.500513	0
CRYZ	1	0	2	0.500257	0.500513	0
PLA2G4C	1	4	2	0.500876	0.501748	0
GNE	1	0	2	0.500257	0.500513	0
PARM1	1	1	2	0.501124	0.502242	0
UMAD1	1	0	2	0.500257	0.500513	0
TMEM14B	1	0	2	0.500257	0.500513	0
CLSPN	1	1	2	0.501124	0.502242	0
RRAD	1	6	2	0.501193	0.502381	0
MTARC1	1	3	2	0.50137	0.502732	0
DHX16	1	0	2	0.500257	0.500513	0
TRIT1	1	0	2	0.500257	0.500513	0
CDC25A	1	1	2	0.501124	0.502242	0
RAB27B	1	7	2	0.50137	0.502732	0
SLC7A8	1	0	2	0.500257	0.500513	0
KLF5	1	0	2	0.500257	0.500513	0
CSF1	1	0	2	0.500257	0.500513	0
HIPK1-AS1	1	4	2	0.500876	0.501748	0
ACOT13	1	0	2	0.500257	0.500513	0
LLGL1	1	0	2	0.500257	0.500513	0
ST6GALNAC3	1	0	2	0.500257	0.500513	0
VNN1	1	3	2	0.50137	0.502732	0
LTK	1	4	2	0.500876	0.501748	0
CDC45	1	1	2	0.501124	0.502242	0
PNMA6F	1	4	2	0.500876	0.501748	0
KIF5C	1	4	2	0.500876	0.501748	0
APOLD1	1	1	2	0.501124	0.502242	0
NUP205	1	0	2	0.500257	0.500513	0
SPEG	1	4	2	0.500876	0.501748	0
ORC6	1	0	2	0.500257	0.500513	0
BOLA3	1	0	2	0.500257	0.500513	0
TBXA2R	1	7	2	0.50137	0.502732	0
SCML1	1	0	2	0.500257	0.500513	0
CLEC10A	1	3	2	0.50137	0.502732	0
AMIGO1	1	4	2	0.500876	0.501748	0
FOXP3	1	4	2	0.500876	0.501748	0
LIN7A	1	3	2	0.50137	0.502732	0
GAS6	1	0	2	0.500257	0.500513	0
COL8A2	1	0	2	0.500257	0.500513	0
RAC1P2	1	2	2	0.503704	0.507353	0
SMAD6	1	3	2	0.50137	0.502732	0
RNF217	1	3	2	0.50137	0.502732	0
LGR6	1	7	2	0.50137	0.502732	0
JAG1	1	3	2	0.50137	0.502732	0
YES1	1	0	2	0.500257	0.500513	0
RIDA	1	0	2	0.500257	0.500513	0
PRKAG1	1	4	2	0.500876	0.501748	0
LDB1	1	0	2	0.500257	0.500513	0
PCSK6	1	7	2	0.50137	0.502732	0
BAIAP3	1	4	2	0.500876	0.501748	0
SLC16A5	1	0	2	0.500257	0.500513	0
PAQR8	1	7	2	0.50137	0.502732	0
TEP1	1	0	2	0.500257	0.500513	0
CHUK	1	0	2	0.500257	0.500513	0
TRIM7	1	6	2	0.501193	0.502381	0
HGH1	1	4	2	0.500876	0.501748	0
NCR3	1	4	2	0.500876	0.501748	0
CLCF1	1	0	2	0.500257	0.500513	0
PDK4	1	1	2	0.501124	0.502242	0
XK	1	7	2	0.50137	0.502732	0
HPCAL4	1	4	2	0.500876	0.501748	0
PSMA6	1	4	2	0.500876	0.501748	0
KIF4A	1	1	2	0.501124	0.502242	0
RAMAC	1	0	2	0.500257	0.500513	0
LINC00402	1	4	2	0.500876	0.501748	0
PRTN3	1	1	2	0.501124	0.502242	0
ACTR5	1	0	2	0.500257	0.500513	0
RNY3	1	4	2	0.500876	0.501748	0
PIK3R3	1	7	2	0.50137	0.502732	0
FAM131A	1	0	2	0.500257	0.500513	0
PTPRM	1	0	2	0.500257	0.500513	0
TMEM150A	1	0	2	0.500257	0.500513	0
DTX1	1	4	2	0.500876	0.501748	0
CMTM8	1	0	2	0.500257	0.500513	0
SORBS3	1	4	2	0.500876	0.501748	0
TRGC1	1	0	2	0.500257	0.500513	0
PSAT1	1	5	2	0.502857	0.505682	0
ATXN7L2	1	0	2	0.500257	0.500513	0
ZBTB47	1	2	2	0.503704	0.507353	0
BHLHA15	1	1	2	0.501124	0.502242	0
DLG5	1	0	2	0.500257	0.500513	0
VNN3	1	3	2	0.50137	0.502732	0
FCGR2C	1	6	2	0.501193	0.502381	0
NOP56P1	1	0	2	0.500257	0.500513	0
TRANK1	1	0	2	0.500257	0.500513	0
CHAC1	1	1	2	0.501124	0.502242	0
L3HYPDH	1	0	2	0.500257	0.500513	0
ATOH8	1	6	2	0.501193	0.502381	0
LINC00852	1	0	2	0.500257	0.500513	0
FOXM1	1	1	2	0.501124	0.502242	0
FNDC10	1	4	2	0.500876	0.501748	0
LRRC61	1	4	2	0.500876	0.501748	0
MIR1244-2	1	0	2	0.500257	0.500513	0
SH3PXD2B	1	0	2	0.500257	0.500513	0
KLRC2	1	7	2	0.50137	0.502732	0
SCAMP5	1	5	2	0.502857	0.505682	0
EVI5	1	3	2	0.50137	0.502732	0
KIFC1	1	1	2	0.501124	0.502242	0
BEX1	1	0	2	0.500257	0.500513	0
GBGT1	1	6	2	0.501193	0.502381	0
FAM89A	1	0	2	0.500257	0.500513	0
C8orf31	1	4	2	0.500876	0.501748	0
NCOA5	1	0	2	0.500257	0.500513	0
HBG2	1	1	2	0.501124	0.502242	0
FN1	1	3	2	0.50137	0.502732	0
SLC46A2	1	3	2	0.50137	0.502732	0
PARPBP	1	1	2	0.501124	0.502242	0
USP49	1	0	2	0.500257	0.500513	0
MYBPC3	1	6	2	0.501193	0.502381	0
HBM	1	6	2	0.501193	0.502381	0
EFNA1	1	0	2	0.500257	0.500513	0
TCEAL3	1	0	2	0.500257	0.500513	0
HSD11B1-AS1	1	6	2	0.501193	0.502381	0
CCDC102A	1	4	2	0.500876	0.501748	0
MEFV	1	3	2	0.50137	0.502732	0
PRSS21	1	1	2	0.501124	0.502242	0
GPR84	1	0	2	0.500257	0.500513	0
LINC01882	1	7	2	0.50137	0.502732	0
TOGARAM2	1	0	2	0.500257	0.500513	0
FER1L4	1	1	2	0.501124	0.502242	0
CAMKK1	1	0	2	0.500257	0.500513	0
NOXA1	1	6	2	0.501193	0.502381	0
ZNF558	1	0	2	0.500257	0.500513	0
SMAD1	1	2	2	0.503704	0.507353	0
DFFB	1	0	2	0.500257	0.500513	0
SLITRK4	1	3	2	0.50137	0.502732	0
GAS6-AS1	1	4	2	0.500876	0.501748	0
MOB1B	1	0	2	0.500257	0.500513	0
TMEM14C	1	0	2	0.500257	0.500513	0
SLC29A2	1	4	2	0.500876	0.501748	0
ELOVL7	1	7	2	0.50137	0.502732	0
IL27	1	5	2	0.502857	0.505682	0
IRAG1	1	7	2	0.50137	0.502732	0
HYAL2	1	0	2	0.500257	0.500513	0
DAPK1	1	3	2	0.50137	0.502732	0
CDK8	1	0	2	0.500257	0.500513	0
LINC01220	1	6	2	0.501193	0.502381	0
CLEC5A	1	3	2	0.50137	0.502732	0
KIF2C	1	1	2	0.501124	0.502242	0
NLRP12	1	3	2	0.50137	0.502732	0
C1QBP	1	0	2	0.500257	0.500513	0
U2AF1	1	4	2	0.500876	0.501748	0
PROSER2	1	0	2	0.500257	0.500513	0
SCN3A	1	0	2	0.500257	0.500513	0
CXCL5	1	0	2	0.500257	0.500513	0
ASTL	1	4	2	0.500876	0.501748	0
CMC1	1	0	2	0.500257	0.500513	0
ALDH1A1	1	0	2	0.500257	0.500513	0
BUD13	1	0	2	0.500257	0.500513	0
MDS2	1	4	2	0.500876	0.501748	0
ZNF367	1	0	2	0.500257	0.500513	0
GLB1L	1	6	2	0.501193	0.502381	0
SOWAHC	1	3	2	0.50137	0.502732	0
CA5BP1	1	4	2	0.500876	0.501748	0
CEROX1	1	4	2	0.500876	0.501748	0
INTS14	1	0	2	0.500257	0.500513	0
RPH3A	1	3	2	0.50137	0.502732	0
SLC49A4	1	3	2	0.50137	0.502732	0
ZNF227	1	0	2	0.500257	0.500513	0
KIR2DL1	1	0	2	0.500257	0.500513	0
TNS3	1	0	2	0.500257	0.500513	0
F8A1	1	0	2	0.500257	0.500513	0
UBE2T	1	1	2	0.501124	0.502242	0
SGPP2	1	0	2	0.500257	0.500513	0
PDIA5	1	0	2	0.500257	0.500513	0
TMEM88	1	4	2	0.500876	0.501748	0
MT-TS2	1	4	2	0.500876	0.501748	0
SLAMF6	1	0	2	0.500257	0.500513	0
IARS2	1	0	2	0.500257	0.500513	0
SNCA	1	7	2	0.50137	0.502732	0
LINC02273	1	0	2	0.500257	0.500513	0
ZNF700	1	0	2	0.500257	0.500513	0
BTBD19	1	4	2	0.500876	0.501748	0
AQP10	1	7	2	0.50137	0.502732	0
KIR3DL1	1	0	2	0.500257	0.500513	0
ALOX12	1	7	2	0.50137	0.502732	0
ELOA-AS1	1	4	2	0.500876	0.501748	0
CAPN12	1	0	2	0.500257	0.500513	0
SOCS6	1	0	2	0.500257	0.500513	0
HKDC1	1	0	2	0.500257	0.500513	0
OR52K3P	1	6	2	0.501193	0.502381	0
SAMD3	1	0	2	0.500257	0.500513	0
TPPP	1	4	2	0.500876	0.501748	0
TNFAIP6	1	0	2	0.500257	0.500513	0
TPM2	1	6	2	0.501193	0.502381	0
CDCA5	1	1	2	0.501124	0.502242	0
ZNF646	1	0	2	0.500257	0.500513	0
WNT1	1	6	2	0.501193	0.502381	0
TMEM255B	1	6	2	0.501193	0.502381	0
CPAMD8	1	6	2	0.501193	0.502381	0
SPACA3	1	1	2	0.501124	0.502242	0
TNFRSF8	1	3	2	0.50137	0.502732	0
MT1M	1	1	2	0.501124	0.502242	0
FAM83D	1	0	2	0.500257	0.500513	0
TBC1D27P	1	1	2	0.501124	0.502242	0
ITSN1	1	3	2	0.50137	0.502732	0
U2AF1L5	1	1	2	0.501124	0.502242	0
DBH-AS1	1	4	2	0.500876	0.501748	0
DLL1	1	0	2	0.500257	0.500513	0
VIM-AS1	1	0	2	0.500257	0.500513	0
KIAA1671	1	6	2	0.501193	0.502381	0
COL9A3	1	0	2	0.500257	0.500513	0
CD34	1	3	2	0.50137	0.502732	0
PRSS57	1	6	2	0.501193	0.502381	0
HAMP	1	0	2	0.500257	0.500513	0
OIP5	1	1	2	0.501124	0.502242	0
UPK3A	1	6	2	0.501193	0.502381	0
FOSL1	1	3	2	0.50137	0.502732	0
SMIM1	1	4	2	0.500876	0.501748	0
NBPF26	1	0	2	0.500257	0.500513	0
PSMC3IP	1	0	2	0.500257	0.500513	0
UCHL1	1	1	2	0.501124	0.502242	0
ADAMTS10	1	4	2	0.500876	0.501748	0
GPAT2	1	4	2	0.500876	0.501748	0
RRN3P1	1	0	2	0.500257	0.500513	0
KIR2DL3	1	0	2	0.500257	0.500513	0
KLHL15	1	0	2	0.500257	0.500513	0
NUP37	1	0	2	0.500257	0.500513	0
CTH	1	0	2	0.500257	0.500513	0
PLEKHH3	1	0	2	0.500257	0.500513	0
CFAP36	1	0	2	0.500257	0.500513	0
DEPP1	1	1	2	0.501124	0.502242	0
TLE2	1	4	2	0.500876	0.501748	0
GSTM3	1	4	2	0.500876	0.501748	0
CASP6	1	0	2	0.500257	0.500513	0
PLTP	1	1	2	0.501124	0.502242	0
BLNK	1	0	2	0.500257	0.500513	0
ELANE	1	1	2	0.501124	0.502242	0
SIRPD	1	2	2	0.503704	0.507353	0
FAM24B	1	0	2	0.500257	0.500513	0
ZFHX2-AS1	1	4	2	0.500876	0.501748	0
SMYD5	1	4	2	0.500876	0.501748	0
MB21D2	1	0	2	0.500257	0.500513	0
ARHGEF17	1	2	2	0.503704	0.507353	0
GNAL	1	0	2	0.500257	0.500513	0
DTL	1	1	2	0.501124	0.502242	0
CEACAM3	1	6	2	0.501193	0.502381	0
SLC25A10	1	1	2	0.501124	0.502242	0
PLCD3	1	3	2	0.50137	0.502732	0
AMN	1	4	2	0.500876	0.501748	0
CHRNE	1	4	2	0.500876	0.501748	0
CPM	1	3	2	0.50137	0.502732	0
FGD6	1	6	2	0.501193	0.502381	0
AXL	1	5	2	0.502857	0.505682	0
FSTL3	1	6	2	0.501193	0.502381	0
FSTL1	1	7	2	0.50137	0.502732	0
PTX3	1	0	2	0.500257	0.500513	0
PIGF	1	0	2	0.500257	0.500513	0
IFITM1	1	0	2	0.500257	0.500513	0
CCL7	1	0	2	0.500257	0.500513	0
PTCH1	1	0	2	0.500257	0.500513	0
C9orf139	1	6	2	0.501193	0.502381	0
TM4SF1	1	1	2	0.501124	0.502242	0
CHST14	1	0	2	0.500257	0.500513	0
C12orf29	1	0	2	0.500257	0.500513	0
MT-TD	1	7	2	0.50137	0.502732	0
RPL7AP30	1	0	2	0.500257	0.500513	0
KRT86	1	4	2	0.500876	0.501748	0
CD160	1	4	2	0.500876	0.501748	0
HAL	1	6	2	0.501193	0.502381	0
WDR86-AS1	1	3	2	0.50137	0.502732	0
CLCN5	1	6	2	0.501193	0.502381	0
CCDC146	1	0	2	0.500257	0.500513	0
KDF1	1	4	2	0.500876	0.501748	0
TUBBP5	1	0	2	0.500257	0.500513	0
MAMDC4	1	4	2	0.500876	0.501748	0
MIR646HG	1	3	2	0.50137	0.502732	0
CMTM5	1	7	2	0.50137	0.502732	0
SELENOM	1	4	2	0.500876	0.501748	0
S1PR3	1	3	2	0.50137	0.502732	0
DCHS1	1	4	2	0.500876	0.501748	0
IFNLR1	1	0	2	0.500257	0.500513	0
NECTIN3	1	0	2	0.500257	0.500513	0
LINC02356	1	6	2	0.501193	0.502381	0
MT-TQ	1	0	2	0.500257	0.500513	0
GDF15	1	1	2	0.501124	0.502242	0
SLC14A1	1	6	2	0.501193	0.502381	0
PLEKHB1	1	4	2	0.500876	0.501748	0
ALOX15B	1	0	2	0.500257	0.500513	0
SLC22A15	1	0	2	0.500257	0.500513	0
SDC1	1	1	2	0.501124	0.502242	0
EAF2	1	0	2	0.500257	0.500513	0
CDC25C	1	1	2	0.501124	0.502242	0
ERBB2	1	0	2	0.500257	0.500513	0
DHRS9	1	6	2	0.501193	0.502381	0
GPR162	1	6	2	0.501193	0.502381	0
MLXIPL	1	2	2	0.503704	0.507353	0
SMPDL3A	1	3	2	0.50137	0.502732	0
FAHD2CP	1	4	2	0.500876	0.501748	0
AASS	1	0	2	0.500257	0.500513	0
GABPA	1	0	2	0.500257	0.500513	0
TBC1D12	1	3	2	0.50137	0.502732	0
MCM10	1	1	2	0.501124	0.502242	0
B3GNT7	1	0	2	0.500257	0.500513	0
SVBP	1	0	2	0.500257	0.500513	0
EOLA1	1	3	2	0.50137	0.502732	0
DRAXIN	1	4	2	0.500876	0.501748	0
ZG16B	1	6	2	0.501193	0.502381	0
NID1	1	3	2	0.50137	0.502732	0
C20orf197	1	6	2	0.501193	0.502381	0
PNMA6A	1	1	2	0.501124	0.502242	0
APBB2	1	0	2	0.500257	0.500513	0
UICLM	1	6	2	0.501193	0.502381	0
PDZD4	1	4	2	0.500876	0.501748	0
KIR3DX1	1	7	2	0.50137	0.502732	0
DNAJC14	1	0	2	0.500257	0.500513	0
OLFM1	1	6	2	0.501193	0.502381	0
PLEKHA4	1	0	2	0.500257	0.500513	0
EPHA4	1	0	2	0.500257	0.500513	0
KLHL7	1	0	2	0.500257	0.500513	0
CALHM2	1	0	2	0.500257	0.500513	0
LTF	1	0	2	0.500257	0.500513	0
SNORD3B-1	1	0	2	0.500257	0.500513	0
FRY-AS1	1	6	2	0.501193	0.502381	0
PLAU	1	0	2	0.500257	0.500513	0
MYRF	1	0	2	0.500257	0.500513	0
CORO1A-AS1	1	4	2	0.500876	0.501748	0
PCDH1	1	4	2	0.500876	0.501748	0
VWF	1	7	2	0.50137	0.502732	0
UTS2	1	0	2	0.500257	0.500513	0
RUSC2	1	0	2	0.500257	0.500513	0
HEMGN	1	0	2	0.500257	0.500513	0
MN1	1	3	2	0.50137	0.502732	0
FBN2	1	3	2	0.50137	0.502732	0
FAM157B	1	6	2	0.501193	0.502381	0
CD177	1	0	2	0.500257	0.500513	0
CDCP1	1	3	2	0.50137	0.502732	0
FOLR2	1	6	2	0.501193	0.502381	0
WDR62	1	1	2	0.501124	0.502242	0
WDR19	1	0	2	0.500257	0.500513	0
LYNX1	1	4	2	0.500876	0.501748	0
FBXO5	1	0	2	0.500257	0.500513	0
ANKRD44-AS1	1	6	2	0.501193	0.502381	0
PRIMPOL	1	0	2	0.500257	0.500513	0
PIK3R6	1	6	2	0.501193	0.502381	0
HLA-V	1	0	2	0.500257	0.500513	0
GINS1	1	1	2	0.501124	0.502242	0
MT1H	1	0	2	0.500257	0.500513	0
UBR5-AS1	1	0	2	0.500257	0.500513	0
CCR5	1	0	2	0.500257	0.500513	0
ANLN	1	0	2	0.500257	0.500513	0
HRAT92	1	7	2	0.50137	0.502732	0
SHB	1	0	2	0.500257	0.500513	0
FHL2	1	7	2	0.50137	0.502732	0
SLC22A4	1	3	2	0.50137	0.502732	0
OPRL1	1	6	2	0.501193	0.502381	0
ETNK2	1	4	2	0.500876	0.501748	0
PLCB1	1	3	2	0.50137	0.502732	0
LIMA1	1	0	2	0.500257	0.500513	0
PLIN5	1	2	2	0.503704	0.507353	0
IQCN	1	4	2	0.500876	0.501748	0
MORC4	1	0	2	0.500257	0.500513	0
RNF208	1	7	2	0.50137	0.502732	0
ATRN	1	0	2	0.500257	0.500513	0
LINC01637	1	0	2	0.500257	0.500513	0
SDC2	1	0	2	0.500257	0.500513	0
SNORD3B-2	1	4	2	0.500876	0.501748	0
FCER1A	1	0	2	0.500257	0.500513	0
DNAJB5	1	0	2	0.500257	0.500513	0
IL1R1	1	0	2	0.500257	0.500513	0
KIF19	1	4	2	0.500876	0.501748	0
SPRED2	1	0	2	0.500257	0.500513	0
XIST	1	0	2	0.500257	0.500513	0
TSSK6	1	4	2	0.500876	0.501748	0
TMPRSS3	1	7	2	0.50137	0.502732	0
SMPD3	1	7	2	0.50137	0.502732	0
ADHFE1	1	0	2	0.500257	0.500513	0
DAPK2	1	7	2	0.50137	0.502732	0
NEK3	1	0	2	0.500257	0.500513	0
PPFIBP1	1	0	2	0.500257	0.500513	0
SYTL4	1	7	2	0.50137	0.502732	0
TRGC2	1	0	2	0.500257	0.500513	0
RAD51AP1	1	1	2	0.501124	0.502242	0
PRSS30P	1	7	2	0.50137	0.502732	0
PRR29	1	7	2	0.50137	0.502732	0
CYP2S1	1	6	2	0.501193	0.502381	0
PWP2	1	3	2	0.50137	0.502732	0
LRMDA	1	0	2	0.500257	0.500513	0
ESPL1	1	0	2	0.500257	0.500513	0
AGAP1	1	0	2	0.500257	0.500513	0
LANCL3	1	7	2	0.50137	0.502732	0
ZSCAN32	1	0	2	0.500257	0.500513	0
EGF	1	7	2	0.50137	0.502732	0
TLR10	1	0	2	0.500257	0.500513	0
SPC25	1	1	2	0.501124	0.502242	0
NAT1	1	0	2	0.500257	0.500513	0
CYP19A1	1	1	2	0.501124	0.502242	0
STEAP3	1	0	2	0.500257	0.500513	0
PMP22	1	3	2	0.50137	0.502732	0
ALAS2	1	0	2	0.500257	0.500513	0
LZTS1	1	0	2	0.500257	0.500513	0
TPTEP1	1	7	2	0.50137	0.502732	0
EPHA1-AS1	1	6	2	0.501193	0.502381	0
H1-4	1	0	2	0.500257	0.500513	0
TFB2M	1	0	2	0.500257	0.500513	0
BNC2	1	0	2	0.500257	0.500513	0
FASLG	1	0	2	0.500257	0.500513	0
PVALB	1	7	2	0.50137	0.502732	0
AIFM3	1	6	2	0.501193	0.502381	0
NAT8B	1	7	2	0.50137	0.502732	0
RNU1-1	1	6	2	0.501193	0.502381	0
TNFSF14	1	6	2	0.501193	0.502381	0
TRPT1	1	0	2	0.500257	0.500513	0
ZFP41	1	4	2	0.500876	0.501748	0
LCN2	1	0	2	0.500257	0.500513	0
RNA5SP207	1	6	2	0.501193	0.502381	0
KRT73	1	4	2	0.500876	0.501748	0
SGMS2	1	0	2	0.500257	0.500513	0
CARMIL3	1	7	2	0.50137	0.502732	0
TMEM63C	1	4	2	0.500876	0.501748	0
P2RX5-TAX1BP3	1	5	2	0.502857	0.505682	0
XCL2	1	0	2	0.500257	0.500513	0
SIGLEC12	1	1	2	0.501124	0.502242	0
RPS29P5	1	0	2	0.500257	0.500513	0
BEGAIN	1	6	2	0.501193	0.502381	0
SLC35A5	1	0	2	0.500257	0.500513	0
SCARF1	1	0	2	0.500257	0.500513	0
MT-TW	1	7	2	0.50137	0.502732	0
TMEM121B	1	0	2	0.500257	0.500513	0
HTR7P1	1	3	2	0.50137	0.502732	0
EGR4	1	0	2	0.500257	0.500513	0
ZMYND15	1	6	2	0.501193	0.502381	0
SLC35E4	1	6	2	0.501193	0.502381	0
USP2	1	0	2	0.500257	0.500513	0
MFAP3L	1	7	2	0.50137	0.502732	0
RNVU1-31	1	4	2	0.500876	0.501748	0
GGTA1	1	0	2	0.500257	0.500513	0
KLHDC1	1	0	2	0.500257	0.500513	0
SDS	1	0	2	0.500257	0.500513	0
BRICD5	1	4	2	0.500876	0.501748	0
LOXL3	1	3	2	0.50137	0.502732	0
IGF1	1	1	2	0.501124	0.502242	0
SLC46A1	1	4	2	0.500876	0.501748	0
CDCA2	1	1	2	0.501124	0.502242	0
FLT3	1	0	2	0.500257	0.500513	0
ANKRD50	1	3	2	0.50137	0.502732	0
GIPC3	1	4	2	0.500876	0.501748	0
FCAR	1	6	2	0.501193	0.502381	0
HEXIM2	1	4	2	0.500876	0.501748	0
THOC3	1	0	2	0.500257	0.500513	0
ALS2CL	1	4	2	0.500876	0.501748	0
CLEC12B	1	3	2	0.50137	0.502732	0
ECT2	1	0	2	0.500257	0.500513	0
MIR3926-1	1	4	2	0.500876	0.501748	0
DNM3	1	0	2	0.500257	0.500513	0
MTCO2P22	1	0	2	0.500257	0.500513	0
TRIP13	1	1	2	0.501124	0.502242	0
ANKRD55	1	0	2	0.500257	0.500513	0
FABP5	1	0	2	0.500257	0.500513	0
CENPA	1	1	2	0.501124	0.502242	0
MFSD2B	1	7	2	0.50137	0.502732	0
ENPP2	1	5	2	0.502857	0.505682	0
LINC02728	1	3	2	0.50137	0.502732	0
LINC02812	1	4	2	0.500876	0.501748	0
BFSP1	1	6	2	0.501193	0.502381	0
IRAK2	1	3	2	0.50137	0.502732	0
HSD3B7	1	2	2	0.503704	0.507353	0
HMMR	1	1	2	0.501124	0.502242	0
OR2B6	1	0	2	0.500257	0.500513	0
DTHD1	1	7	2	0.50137	0.502732	0
RPL32P1	1	3	2	0.50137	0.502732	0
TROAP	1	1	2	0.501124	0.502242	0
FBLN7	1	0	2	0.500257	0.500513	0
OLFM4	1	0	2	0.500257	0.500513	0
LINC02158	1	3	2	0.50137	0.502732	0
PTMS	1	5	2	0.502857	0.505682	0
IL1A	1	3	2	0.50137	0.502732	0
TRNP1	1	3	2	0.50137	0.502732	0
ZNF737	1	0	2	0.500257	0.500513	0
POLQ	1	1	2	0.501124	0.502242	0
SKA3	1	1	2	0.501124	0.502242	0
TP73	1	1	2	0.501124	0.502242	0
ARL16	1	0	2	0.500257	0.500513	0
KIAA0895	1	0	2	0.500257	0.500513	0
MELK	1	1	2	0.501124	0.502242	0
HRK	1	6	2	0.501193	0.502381	0
SEMA6C	1	4	2	0.500876	0.501748	0
LINC01146	1	5	2	0.502857	0.505682	0
SOBP	1	5	2	0.502857	0.505682	0
NFE2L1-DT	1	4	2	0.500876	0.501748	0
ZNF175	1	0	2	0.500257	0.500513	0
IER3-AS1	1	3	2	0.50137	0.502732	0
LTBP1	1	7	2	0.50137	0.502732	0
TYMSOS	1	1	2	0.501124	0.502242	0
KCTD14	1	1	2	0.501124	0.502242	0
TACSTD2	1	3	2	0.50137	0.502732	0
SOX13	1	0	2	0.500257	0.500513	0
TMEM45A	1	1	2	0.501124	0.502242	0
PDGFD	1	7	2	0.50137	0.502732	0
TM6SF1	1	0	2	0.500257	0.500513	0
LRFN3	1	4	2	0.500876	0.501748	0
SPATA6	1	3	2	0.50137	0.502732	0
LRRC32	1	6	2	0.501193	0.502381	0
ZDHHC23	1	0	2	0.500257	0.500513	0
SHISA8	1	4	2	0.500876	0.501748	0
C2orf27A	1	0	2	0.500257	0.500513	0
FBLN5	1	4	2	0.500876	0.501748	0
WLS	1	3	2	0.50137	0.502732	0
CARNS1	1	4	2	0.500876	0.501748	0
BUB1	1	1	2	0.501124	0.502242	0
IFI6	1	5	2	0.502857	0.505682	0
PGAM1	1	0	2	0.500257	0.500513	0
EME1	1	1	2	0.501124	0.502242	0
TTK	1	1	2	0.501124	0.502242	0
FRG1GP	1	0	2	0.500257	0.500513	0
CH25H	1	0	2	0.500257	0.500513	0
LINC00892	1	7	2	0.50137	0.502732	0
REPS2	1	6	2	0.501193	0.502381	0
GP6	1	0	2	0.500257	0.500513	0
PROC	1	6	2	0.501193	0.502381	0
FZD6	1	0	2	0.500257	0.500513	0
ZNF571	1	0	2	0.500257	0.500513	0
SAMD14	1	7	2	0.50137	0.502732	0
GUCY1B1	1	7	2	0.50137	0.502732	0
FPR3	1	0	2	0.500257	0.500513	0
DINOL	1	3	2	0.50137	0.502732	0
DNAAF5	1	0	2	0.500257	0.500513	0
TNFRSF9	1	0	2	0.500257	0.500513	0
PCAT1	1	7	2	0.50137	0.502732	0
DPM2	1	4	2	0.500876	0.501748	0
NBPF12	1	0	2	0.500257	0.500513	0
RPL30P4	1	0	2	0.500257	0.500513	0
KIF23	1	0	2	0.500257	0.500513	0
RNU4-1	1	6	2	0.501193	0.502381	0
TDRD9	1	3	2	0.50137	0.502732	0
FOXJ1	1	0	2	0.500257	0.500513	0
ENKUR	1	7	2	0.50137	0.502732	0
RASIP1	1	1	2	0.501124	0.502242	0
CLEC2L	1	7	2	0.50137	0.502732	0
IFI30	1	6	2	0.501193	0.502381	0
FUT5	1	6	2	0.501193	0.502381	0
GLB1L2	1	4	2	0.500876	0.501748	0
CAVIN1	1	1	2	0.501124	0.502242	0
ZNF567	1	0	2	0.500257	0.500513	0
SYNM	1	0	2	0.500257	0.500513	0
PCGF2	1	6	2	0.501193	0.502381	0
PHLDA3	1	4	2	0.500876	0.501748	0
ZSCAN21	1	0	2	0.500257	0.500513	0
ADAMTS14	1	5	2	0.502857	0.505682	0
ANKRD20A11P	1	6	2	0.501193	0.502381	0
PEX3	1	0	2	0.500257	0.500513	0
KCNJ15	1	3	2	0.50137	0.502732	0
LINC01270	1	3	2	0.50137	0.502732	0
GPR141BP	1	3	2	0.50137	0.502732	0
DOCK4	1	0	2	0.500257	0.500513	0
RPL23AP74	1	0	2	0.500257	0.500513	0
CKAP2L	1	0	2	0.500257	0.500513	0
KRT73-AS1	1	4	2	0.500876	0.501748	0
MGC16275	1	6	2	0.501193	0.502381	0
HLA-L	1	4	2	0.500876	0.501748	0
ELOVL3	1	0	2	0.500257	0.500513	0
B3GNT8	1	2	2	0.503704	0.507353	0
RGMA	1	3	2	0.50137	0.502732	0
OSBP2	1	7	2	0.50137	0.502732	0
MAGI3	1	0	2	0.500257	0.500513	0
RBPMS2	1	7	2	0.50137	0.502732	0
IGLV6-57	1	1	2	0.501124	0.502242	0
PAX8	1	6	2	0.501193	0.502381	0
HSPA2	1	0	2	0.500257	0.500513	0
BATF2	1	5	2	0.502857	0.505682	0
FAM86JP	1	4	2	0.500876	0.501748	0
MSC	1	0	2	0.500257	0.500513	0
LARGE1	1	4	2	0.500876	0.501748	0
PLPP2	1	4	2	0.500876	0.501748	0
GTSE1	1	0	2	0.500257	0.500513	0
GPRC5D-AS1	1	0	2	0.500257	0.500513	0
AKAP5	1	0	2	0.500257	0.500513	0
GATA2	1	0	2	0.500257	0.500513	0
SEPTIN4	1	5	2	0.502857	0.505682	0
H4C2	1	1	2	0.501124	0.502242	0
TGM1	1	7	2	0.50137	0.502732	0
SMIM30	1	0	2	0.500257	0.500513	0
C2CD4B	1	1	2	0.501124	0.502242	0
BHLHE41	1	0	2	0.500257	0.500513	0
BUB1B	1	1	2	0.501124	0.502242	0
NR6A1	1	6	2	0.501193	0.502381	0
ANKRD36BP2	1	0	2	0.500257	0.500513	0
EPHB3	1	6	2	0.501193	0.502381	0
AMOTL1	1	0	2	0.500257	0.500513	0
FFAR3	1	0	2	0.500257	0.500513	0
SLPI	1	1	2	0.501124	0.502242	0
CNN1	1	7	2	0.50137	0.502732	0
PPIEL	1	4	2	0.500876	0.501748	0
VTRNA1-1	1	7	2	0.50137	0.502732	0
CLIC3	1	4	2	0.500876	0.501748	0
ZNF667-AS1	1	4	2	0.500876	0.501748	0
OR52N4	1	1	2	0.501124	0.502242	0
PATJ-DT	1	7	2	0.50137	0.502732	0
ASPM	1	1	2	0.501124	0.502242	0
LZTS2	1	0	2	0.500257	0.500513	0
SRGAP2C	1	6	2	0.501193	0.502381	0
CDR2L	1	0	2	0.500257	0.500513	0
RPS17	1	0	2	0.500257	0.500513	0
EPB41L4A	1	7	2	0.50137	0.502732	0
CA2	1	0	2	0.500257	0.500513	0
ZBTB46	1	6	2	0.501193	0.502381	0
DENND2C	1	0	2	0.500257	0.500513	0
MYO10	1	0	2	0.500257	0.500513	0
LINC02610	1	4	2	0.500876	0.501748	0
MYEOV	1	7	2	0.50137	0.502732	0
EPAS1	1	0	2	0.500257	0.500513	0
EPHA1	1	4	2	0.500876	0.501748	0
HOXA9	1	0	2	0.500257	0.500513	0
ZNF559	1	0	2	0.500257	0.500513	0
LINC01451	1	6	2	0.501193	0.502381	0
RIPOR3	1	0	2	0.500257	0.500513	0
SLC7A11	1	0	2	0.500257	0.500513	0
STK32B	1	6	2	0.501193	0.502381	0
PDGFB	1	0	2	0.500257	0.500513	0
CCDC163	1	0	2	0.500257	0.500513	0
STC1	1	0	2	0.500257	0.500513	0
FLT1	1	0	2	0.500257	0.500513	0
CYBRD1	1	3	2	0.50137	0.502732	0
ARHGAP6	1	7	2	0.50137	0.502732	0
ANKEF1	1	4	2	0.500876	0.501748	0
ANKRD34A	1	4	2	0.500876	0.501748	0
SH3TC2	1	3	2	0.50137	0.502732	0
SNHG30	1	0	2	0.500257	0.500513	0
GPR15	1	0	2	0.500257	0.500513	0
ANO7L1	1	5	2	0.502857	0.505682	0
ATAD5	1	0	2	0.500257	0.500513	0
HBQ1	1	7	2	0.50137	0.502732	0
FKTN	1	0	2	0.500257	0.500513	0
GCOM1	1	7	2	0.50137	0.502732	0
ST8SIA6	1	7	2	0.50137	0.502732	0
HEATR9	1	6	2	0.501193	0.502381	0
PTGDR	1	0	2	0.500257	0.500513	0
ABO	1	0	2	0.500257	0.500513	0
PPP4C	1	0	2	0.500257	0.500513	0
MS4A14	1	3	2	0.50137	0.502732	0
CEP55	1	1	2	0.501124	0.502242	0
BPI	1	0	2	0.500257	0.500513	0
RNVU1-34	1	1	2	0.501124	0.502242	0
MEST	1	0	2	0.500257	0.500513	0
MESP1	1	1	2	0.501124	0.502242	0
DLGAP5	1	1	2	0.501124	0.502242	0
SLC24A3	1	7	2	0.50137	0.502732	0
CRTC2	1	0	2	0.500257	0.500513	0
BRMS1L	1	0	2	0.500257	0.500513	0
GUCY1A1	1	7	2	0.50137	0.502732	0
HP	1	0	2	0.500257	0.500513	0
TDRP	1	0	2	0.500257	0.500513	0
COX20P1	1	0	2	0.500257	0.500513	0
TUBAP2	1	1	2	0.501124	0.502242	0
STON2	1	0	2	0.500257	0.500513	0
PRKCI	1	0	2	0.500257	0.500513	0
TRAPPC3L	1	7	2	0.50137	0.502732	0
DHFR	1	1	2	0.501124	0.502242	0
FCER2	1	4	2	0.500876	0.501748	0
RGS6	1	0	2	0.500257	0.500513	0
SCARNA18	1	5	2	0.502857	0.505682	0
MPP2	1	1	2	0.501124	0.502242	0
MAPK8IP1	1	4	2	0.500876	0.501748	0
TASL	1	6	2	0.501193	0.502381	0
LAT	1	4	2	0.500876	0.501748	0
TMEM202-AS1	1	0	2	0.500257	0.500513	0
CA1	1	0	2	0.500257	0.500513	0
LAMA5	1	0	2	0.500257	0.500513	0
ARHGEF37	1	0	2	0.500257	0.500513	0
NEURL1B	1	0	2	0.500257	0.500513	0
IGHE	1	4	2	0.500876	0.501748	0
ARVCF	1	0	2	0.500257	0.500513	0
TMEM37	1	1	2	0.501124	0.502242	0
MAP2	1	7	2	0.50137	0.502732	0
CYP4F29P	1	4	2	0.500876	0.501748	0
HTRA1	1	6	2	0.501193	0.502381	0
CMTM2	1	3	2	0.50137	0.502732	0
KIF20A	1	0	2	0.500257	0.500513	0
LEF1-AS1	1	4	2	0.500876	0.501748	0
USP18	1	5	2	0.502857	0.505682	0
CAV1	1	0	2	0.500257	0.500513	0
MYCT1	1	0	2	0.500257	0.500513	0
LINC02256	1	4	2	0.500876	0.501748	0
HID1	1	1	2	0.501124	0.502242	0
GBP1P1	1	0	2	0.500257	0.500513	0
C2CD5	1	0	2	0.500257	0.500513	0
ZNF280B	1	0	2	0.500257	0.500513	0
TMIGD3	1	2	2	0.503704	0.507353	0
MNAT1	1	0	2	0.500257	0.500513	0
ZNF117	1	0	2	0.500257	0.500513	0
KAZALD1	1	0	2	0.500257	0.500513	0
LINC02754	1	4	2	0.500876	0.501748	0
ZDHHC1	1	6	2	0.501193	0.502381	0
REEP6	1	4	2	0.500876	0.501748	0
AATBC	1	6	2	0.501193	0.502381	0
PLK4	1	0	2	0.500257	0.500513	0
VCAM1	1	0	2	0.500257	0.500513	0
MAP3K4-AS1	1	0	2	0.500257	0.500513	0
ZBTB49	1	0	2	0.500257	0.500513	0
DYRK3	1	0	2	0.500257	0.500513	0
LINC02573	1	3	2	0.50137	0.502732	0
RNF152	1	0	2	0.500257	0.500513	0
ECE1-AS1	1	4	2	0.500876	0.501748	0
MS4A3	1	0	2	0.500257	0.500513	0
CDKL5	1	4	2	0.500876	0.501748	0
VMO1	1	4	2	0.500876	0.501748	0
IDH1-AS1	1	0	2	0.500257	0.500513	0
CTSG	1	1	2	0.501124	0.502242	0
OVCH1-AS1	1	0	2	0.500257	0.500513	0
FOXC1	1	0	2	0.500257	0.500513	0
SEPTIN10	1	0	2	0.500257	0.500513	0
RNF43	1	0	2	0.500257	0.500513	0
SCGB3A1	1	4	2	0.500876	0.501748	0
NME8	1	0	2	0.500257	0.500513	0
RNA5SP221	1	0	2	0.500257	0.500513	0
RND1	1	0	2	0.500257	0.500513	0
TMEM45B	1	0	2	0.500257	0.500513	0
PPP1R13L	1	0	2	0.500257	0.500513	0
CCL19	1	7	2	0.50137	0.502732	0
LONRF3	1	0	2	0.500257	0.500513	0
CYP1B1-AS1	1	0	2	0.500257	0.500513	0
SPRY1	1	0	2	0.500257	0.500513	0
XCL1	1	0	2	0.500257	0.500513	0
CERCAM	1	7	2	0.50137	0.502732	0
SCARNA21	1	4	2	0.500876	0.501748	0
TFPI	1	7	2	0.50137	0.502732	0
KCNN3	1	1	2	0.501124	0.502242	0
FLJ31104	1	1	2	0.501124	0.502242	0
HLA-DQB2	1	0	2	0.500257	0.500513	0
ARHGAP22	1	6	2	0.501193	0.502381	0
LINC01765	1	4	2	0.500876	0.501748	0
PXDC1	1	0	2	0.500257	0.500513	0
LINC01063	1	0	2	0.500257	0.500513	0
LINC02175	1	0	2	0.500257	0.500513	0
MT-TC	1	7	2	0.50137	0.502732	0
MEG3	1	7	2	0.50137	0.502732	0
SPAG4	1	1	2	0.501124	0.502242	0
TRAV30	1	4	2	0.500876	0.501748	0
TICRR	1	0	2	0.500257	0.500513	0
SGO2	1	1	2	0.501124	0.502242	0
ZSWIM3	1	0	2	0.500257	0.500513	0
FAM86C2P	1	5	2	0.502857	0.505682	0
RCAN2	1	1	2	0.501124	0.502242	0
FAM241B	1	0	2	0.500257	0.500513	0
ACSBG1	1	7	2	0.50137	0.502732	0
ST6GALNAC6	1	4	2	0.500876	0.501748	0
LAMB3	1	0	2	0.500257	0.500513	0
UBQLNL	1	4	2	0.500876	0.501748	0
AQP8	1	6	2	0.501193	0.502381	0
NAP1L2	1	0	2	0.500257	0.500513	0
MMP19	1	3	2	0.50137	0.502732	0
LINC01891	1	0	2	0.500257	0.500513	0
KIF18B	1	1	2	0.501124	0.502242	0
CLEC4C	1	7	2	0.50137	0.502732	0
PCYT1B	1	7	2	0.50137	0.502732	0
TRAIP	1	0	2	0.500257	0.500513	0
PKHD1L1	1	0	2	0.500257	0.500513	0
ASAP2	1	0	2	0.500257	0.500513	0
EEF1AKMT4	1	2	2	0.503704	0.507353	0
DIP2C	1	7	2	0.50137	0.502732	0
HEATR5A	1	0	2	0.500257	0.500513	0
DEPDC1B	1	0	2	0.500257	0.500513	0
ZNF439	1	0	2	0.500257	0.500513	0
TMEM255A	1	5	2	0.502857	0.505682	0
DAGLA	1	0	2	0.500257	0.500513	0
PIK3CD-AS2	1	1	2	0.501124	0.502242	0
COL1A1	1	0	2	0.500257	0.500513	0
WASF1	1	0	2	0.500257	0.500513	0
TINAGL1	1	0	2	0.500257	0.500513	0
NEBL	1	0	2	0.500257	0.500513	0
ATP6V0E2-AS1	1	4	2	0.500876	0.501748	0
LINC00900	1	3	2	0.50137	0.502732	0
PEX11G	1	5	2	0.502857	0.505682	0
WNT11	1	0	2	0.500257	0.500513	0
RPL7P24	1	3	2	0.50137	0.502732	0
DDO	1	0	2	0.500257	0.500513	0
PI16	1	4	2	0.500876	0.501748	0
TREX2	1	4	2	0.500876	0.501748	0
SYNPO	1	4	2	0.500876	0.501748	0
RAB6B	1	3	2	0.50137	0.502732	0
TOMM20P2	1	7	2	0.50137	0.502732	0
BCKDHB	1	0	2	0.500257	0.500513	0
KNDC1	1	6	2	0.501193	0.502381	0
PCSK1N	1	4	2	0.500876	0.501748	0
RNY4P34	1	7	2	0.50137	0.502732	0
ENHO	1	4	2	0.500876	0.501748	0
UHRF1	1	0	2	0.500257	0.500513	0
RNU6-1016P	1	4	2	0.500876	0.501748	0
PDCD6IPP2	1	0	2	0.500257	0.500513	0
FLT3LG	1	4	2	0.500876	0.501748	0
RNU1-2	1	6	2	0.501193	0.502381	0
LIM2	1	5	2	0.502857	0.505682	0
VSIG1	1	4	2	0.500876	0.501748	0
SLC16A14	1	1	2	0.501124	0.502242	0
TIMP4	1	1	2	0.501124	0.502242	0
GATD3A	1	6	2	0.501193	0.502381	0
IL18	1	0	2	0.500257	0.500513	0
NDN	1	3	2	0.50137	0.502732	0
NBPF9	1	0	2	0.500257	0.500513	0
NLRP7	1	1	2	0.501124	0.502242	0
LINC02207	1	0	2	0.500257	0.500513	0
COLGALT2	1	0	2	0.500257	0.500513	0
KRT2	1	4	2	0.500876	0.501748	0
BTNL9	1	0	2	0.500257	0.500513	0
OXT	1	4	2	0.500876	0.501748	0
FAM198B-AS1	1	0	2	0.500257	0.500513	0
LINC01918	1	7	2	0.50137	0.502732	0
DPEP3	1	4	2	0.500876	0.501748	0
JAKMIP2	1	4	2	0.500876	0.501748	0
CAV2	1	7	2	0.50137	0.502732	0
WWTR1	1	0	2	0.500257	0.500513	0
P3H3	1	4	2	0.500876	0.501748	0
C1QTNF3	1	0	2	0.500257	0.500513	0
RAMP3	1	7	2	0.50137	0.502732	0
CTC-338M12.4	1	0	2	0.500257	0.500513	0
USP7-AS1	1	4	2	0.500876	0.501748	0
IRX3	1	3	2	0.50137	0.502732	0
RAD54L	1	0	2	0.500257	0.500513	0
SNORD71	1	4	2	0.500876	0.501748	0
TMTC1	1	0	2	0.500257	0.500513	0
MIR503HG	1	1	2	0.501124	0.502242	0
NTSR1	1	3	2	0.50137	0.502732	0
SNRPGP2	1	0	2	0.500257	0.500513	0
NACA3P	1	0	2	0.500257	0.500513	0
PFN2	1	0	2	0.500257	0.500513	0
ARHGAP8	1	4	2	0.500876	0.501748	0
CRYZL2P	1	0	2	0.500257	0.500513	0
COL5A3	1	4	2	0.500876	0.501748	0
RPS7P10	1	0	2	0.500257	0.500513	0
SPON1	1	0	2	0.500257	0.500513	0
TEAD2	1	1	2	0.501124	0.502242	0
DEFA3	1	1	2	0.501124	0.502242	0
DNM1	1	6	2	0.501193	0.502381	0
ZNF366	1	5	2	0.502857	0.505682	0
TM9SF1	1	1	2	0.501124	0.502242	0
STEAP4	1	3	2	0.50137	0.502732	0
SIGLEC17P	1	3	2	0.50137	0.502732	0
F3	1	3	2	0.50137	0.502732	0
SEC14L5	1	7	2	0.50137	0.502732	0
NUGGC	1	1	2	0.501124	0.502242	0
THBS1-IT1	1	0	2	0.500257	0.500513	0
CABP5	1	7	2	0.50137	0.502732	0
PARD3	1	7	2	0.50137	0.502732	0
TEPP	1	4	2	0.500876	0.501748	0
PRCD	1	0	2	0.500257	0.500513	0
TIMP3	1	0	2	0.500257	0.500513	0
ADORA2B	1	3	2	0.50137	0.502732	0
GUSBP2	1	4	2	0.500876	0.501748	0
BEND2	1	3	2	0.50137	0.502732	0
ECHDC3	1	0	2	0.500257	0.500513	0
KLHL35	1	7	2	0.50137	0.502732	0
CALD1	1	7	2	0.50137	0.502732	0
KCNK17	1	6	2	0.501193	0.502381	0
SEMA3G	1	1	2	0.501124	0.502242	0
PPM1K-DT	1	5	2	0.502857	0.505682	0
RN7SL32P	1	4	2	0.500876	0.501748	0
MXRA8	1	4	2	0.500876	0.501748	0
SLC27A2	1	0	2	0.500257	0.500513	0
AUNIP	1	1	2	0.501124	0.502242	0
C9orf64	1	0	2	0.500257	0.500513	0
PODXL	1	0	2	0.500257	0.500513	0
LINC00824	1	4	2	0.500876	0.501748	0
DHX35-DT	1	1	2	0.501124	0.502242	0
REG4	1	4	2	0.500876	0.501748	0
ADGRE3	1	3	2	0.50137	0.502732	0
PIANP	1	0	2	0.500257	0.500513	0
ZNF154	1	0	2	0.500257	0.500513	0
SPNS2	1	0	2	0.500257	0.500513	0
UBXN10	1	1	2	0.501124	0.502242	0
MTND5P11	1	6	2	0.501193	0.502381	0
FAM229B	1	4	2	0.500876	0.501748	0
SPA17	1	1	2	0.501124	0.502242	0
ZNF385D	1	0	2	0.500257	0.500513	0
RBM38-AS1	1	4	2	0.500876	0.501748	0
SLCO2B1	1	1	2	0.501124	0.502242	0
CT70	1	6	2	0.501193	0.502381	0
H1-3	1	0	2	0.500257	0.500513	0
LINC01730	1	6	2	0.501193	0.502381	0
CNIH2	1	1	2	0.501124	0.502242	0
CPA5	1	4	2	0.500876	0.501748	0
PTPRU	1	5	2	0.502857	0.505682	0
KIF14	1	1	2	0.501124	0.502242	0
ESPN	1	4	2	0.500876	0.501748	0
DDX43	1	0	2	0.500257	0.500513	0
NACAD	1	4	2	0.500876	0.501748	0
DSP	1	0	2	0.500257	0.500513	0
SLC4A10	1	0	2	0.500257	0.500513	0
MYL4	1	7	2	0.50137	0.502732	0
[truncated: 224 more rows]
